# Supplementary material for: Analysis of the complete mitogenomes of three high economic value tea plants (Tea-oil Camellia) provide insights into evolution and phylogeny relationship
Source: Front Plant Sci. 2025 Apr 24;16:1549185. doi: 10.3389/fpls.2025.1549185 (PMC12058841; doi:10.3389/fpls.2025.1549185)
Supplement: Supplementary file 1 [file Table1.xlsx]

## Sheet: Table S1
Table S1 Summary of sequence data obtained from the Nanopore platform
	Number of Reads	Number of Bases	Mean Read Length	N50 Read Length
XG	1995353	23173409852	11613	26912
PT	1689540	21315458135	12616	27910

## Sheet: Table S2
Table S2 Summary of sequence data obtained from the Illumina platform
	ReadSum	BaseSum	GC(%)	Q20(%)	Q30(%)
XG	136793447	41038034100	38.89	96.58	91.59
PT	140083000	42024900000	38.88	96.51	91.53

## Sheet: Table S3
Table S3 The protein-coding genes of the mitochondrial genome of C. oleifera and C. meiocarpa
	C. oleifera	C. meiocarpa	C. drupifera
Group of genes	Gene name	Gene name	Gene name
ATP synthase	atp1 atp4 atp6 atp8 atp9	atp1 atp4 atp6 atp8 atp9	atp1 atp4 atp6 atp8 atp9
Cytohrome c biogenesis	ccmB ccmC ccmFc* ccmFn	ccmB ccmC ccmFc* ccmFn	ccmB ccmC ccmFc* ccmFn
Ubiquinol cytochrome c reductase	cob	cob	cob
Cytochrome c oxidase	#cox2 cox1 cox2 cox3	#cox2 cox1 cox2 cox3	#cox2 cox1 cox2 cox3
Maturases	matR	matR	matR
Transport membrane protein	mttB	mttB	mttB
NADH dehydrogenase	nad1**** nad2**** nad3 nad4** nad4L nad5**** nad6 nad7**** nad9	nad1**** nad2**** nad3 nad4** nad4L nad5**** nad6 nad7**** nad9	nad1**** nad2****(2) nad3 nad4** nad4L nad5**** nad6 nad7**** nad9
Ribosomal proteins (LSU)	rpl10 rpl16 rpl2* rpl5	rpl10 rpl16 rpl2* rpl5	rpl10 rpl16 rpl2* rpl5
Ribosomal proteins (SSU)	#rps19 rps1 rps12(2) rps13 rps14 rps19 rps3* rps4 rps7	#rps19 rps1 rps12 rps13 rps14 rps19 rps3* rps4 rps7	#rps19 #rps7 rps1 rps12(2) rps13 rps14 rps19 rps3* rps4 rps7
Succinate dehydrogenase	sdh3 sdh4	sdh3 sdh4	sdh3 sdh4
Ribosomal RNAs	rrn18 rrn26 rrn5	rrn18 rrn26 rrn5	rrn18 rrn26 rrn5
Transfer RNAs	trnA-TGC* trnC-GCA(2) trnD-GTC trnE-TTC trnF-AAA* trnF-GAA trnG-GCC trnH-GTG trnI-GAT*(2) trnK-TTT trnM-CAT(6) trnN-ATT trnN-GTT trnP-TGG(2) trnQ-TTG trnS-CGA trnS-GCT trnS-TGA trnS-TGA* trnT-GGT* trnT-TGT* trnV-GAC trnW-CCA trnY-GTA	trnA-TGC* trnC-GCA(2) trnD-GTC trnE-TTC trnF-AAA* trnF-GAA trnG-GCC trnH-GTG trnI-GAT*(2) trnK-TTT trnM-CAT(6) trnN-ATT trnN-GTT trnP-TGG(2) trnQ-TTG trnS-CGA trnS-GCT trnS-TGA trnS-TGA* trnT-TGT* trnV-GAC trnW-CCA trnY-GTA	trnA-TGC* trnC-GCA(2) trnD-GTC trnE-TTC trnF-AAA* trnF-GAA trnG-GCC trnH-GTG trnI-GAT*(2) trnK-TTT trnM-CAT(6) trnN-ATT trnN-GTT trnP-TGG trnQ-TTG trnS-GCT(2) trnS-TGA trnS-TGA* trnT-GGT* trnT-TGT* trnV-GAC trnW-CCA(2) trnY-GTA
other
Notes:*:intron number;#Gene:Pseudo gene;Gene(2):Number of copies of multi-copy genes;

## Sheet: Table S4
Table S4 The Pi values in genes among three Tea-oil Camellia
No.	Region	Pi	Total Number of mutations	Region length
1	gene1.cox1	0.00042	1	1584
2	gene10.mttB	0	0	348
3	gene11.ccmB	0	0	621
4	gene12.rpl10	0	0	489
5	gene13.rps7	0	0	447
6	gene14.nad2	0	0	1467
7	gene15.nad1	0	0	978
8	gene16.sdh3	0	0	321
9	gene17.cox2	0	0	792
10	gene18.atp9	0	0	225
11	gene19.atp1	0.00044	1	1530
12	gene2.rrn5	0	0	121
13	gene20.rps4	0.00063	1	1059
14	gene21.nad6	0	0	618
15	gene22.nad7	0.00056	1	1185
16	gene23.nad3	0	0	357
17	gene24.rps12	0	0	378
18	gene25.sdh4	0.00154	1	432
19	gene26.cox3	0	0	798
20	gene27.atp8	0.00139	1	480
21	gene28.cob	0	0	1182
22	gene29.rps14	0	0	303
23	gene3.rrn18	0	0	1930
24	gene30.rpl5	0	0	564
25	gene31.rps13	0.0019	1	351
26	gene32.rrn26	0.00113	6	3599
27	gene33.nad4L	0	0	303
28	gene34.atp4	0	0	579
29	gene35.ccmC	0	0	753
30	gene36.ccmFn	0	0	1797
31	gene37.matR	0	0	1968
32	gene38.rps19	0	0	285
33	gene39.nad5	0	0	2013
34	gene4.rpl2	0	0	1008
35	gene40.ccmFc	0	0	1317
36	gene41.nad9	0	0	573
37	gene5.rps3	0.00039	1	1692
38	gene6.rpl16	0	0	435
39	gene7.rps1	0	0	606
40	gene8.nad4	0	0	1488
41	gene9.atp6	0	0	720

## Sheet: Table S5
Table S5 The Ka/Ks values in genes among three Tea-oil Camellia
Kaks	Gene	Vs
NA	atp1	Camellia oleifera vs Camellia_drupifera
NA	atp1	Camellia oleifera vs Camellia meiocarpa
NA	atp1	Camellia meiocarpa vs Camellia_drupifera
NA	atp4	Camellia oleifera vs Camellia_drupifera
NA	atp4	Camellia oleifera vs Camellia meiocarpa
NA	atp4	Camellia meiocarpa vs Camellia_drupifera
NA	atp6	Camellia oleifera vs Camellia_drupifera
NA	atp6	Camellia oleifera vs Camellia meiocarpa
NA	atp6	Camellia meiocarpa vs Camellia_drupifera
NA	atp8	Camellia oleifera vs Camellia_drupifera
NA	atp8	Camellia oleifera vs Camellia meiocarpa
NA	atp8	Camellia meiocarpa vs Camellia_drupifera
NA	atp9	Camellia oleifera vs Camellia_drupifera
NA	atp9	Camellia oleifera vs Camellia meiocarpa
NA	atp9	Camellia meiocarpa vs Camellia_drupifera
NA	ccmB	Camellia oleifera vs Camellia_drupifera
NA	ccmB	Camellia oleifera vs Camellia meiocarpa
NA	ccmB	Camellia meiocarpa vs Camellia_drupifera
NA	ccmC	Camellia oleifera vs Camellia_drupifera
NA	ccmC	Camellia oleifera vs Camellia meiocarpa
NA	ccmC	Camellia meiocarpa vs Camellia_drupifera
NA	ccmFc	Camellia oleifera vs Camellia_drupifera
NA	ccmFc	Camellia oleifera vs Camellia meiocarpa
NA	ccmFc	Camellia meiocarpa vs Camellia_drupifera
NA	ccmFn	Camellia oleifera vs Camellia_drupifera
NA	ccmFn	Camellia oleifera vs Camellia meiocarpa
NA	ccmFn	Camellia meiocarpa vs Camellia_drupifera
NA	cob	Camellia oleifera vs Camellia_drupifera
NA	cob	Camellia oleifera vs Camellia meiocarpa
NA	cob	Camellia meiocarpa vs Camellia_drupifera
0	cox1	Camellia oleifera vs Camellia_drupifera
NA	cox1	Camellia oleifera vs Camellia meiocarpa
0	cox1	Camellia meiocarpa vs Camellia_drupifera
NA	cox2	Camellia oleifera vs Camellia_drupifera
NA	cox2	Camellia oleifera vs Camellia meiocarpa
NA	cox2	Camellia meiocarpa vs Camellia_drupifera
NA	cox3	Camellia oleifera vs Camellia_drupifera
NA	cox3	Camellia oleifera vs Camellia meiocarpa
NA	cox3	Camellia meiocarpa vs Camellia_drupifera
NA	matR	Camellia oleifera vs Camellia_drupifera
NA	matR	Camellia oleifera vs Camellia meiocarpa
NA	matR	Camellia meiocarpa vs Camellia_drupifera
NA	mttB	Camellia oleifera vs Camellia_drupifera
NA	mttB	Camellia oleifera vs Camellia meiocarpa
NA	mttB	Camellia meiocarpa vs Camellia_drupifera
NA	nad1	Camellia oleifera vs Camellia_drupifera
NA	nad1	Camellia oleifera vs Camellia meiocarpa
NA	nad1	Camellia meiocarpa vs Camellia_drupifera
NA	nad2	Camellia oleifera vs Camellia_drupifera
NA	nad2	Camellia oleifera vs Camellia meiocarpa
NA	nad2	Camellia meiocarpa vs Camellia_drupifera
NA	nad3	Camellia oleifera vs Camellia_drupifera
NA	nad3	Camellia oleifera vs Camellia meiocarpa
NA	nad3	Camellia meiocarpa vs Camellia_drupifera
NA	nad4	Camellia oleifera vs Camellia_drupifera
NA	nad4	Camellia oleifera vs Camellia meiocarpa
NA	nad4	Camellia meiocarpa vs Camellia_drupifera
NA	nad4L	Camellia oleifera vs Camellia_drupifera
NA	nad4L	Camellia oleifera vs Camellia meiocarpa
NA	nad4L	Camellia meiocarpa vs Camellia_drupifera
NA	nad5	Camellia oleifera vs Camellia_drupifera
NA	nad5	Camellia oleifera vs Camellia meiocarpa
NA	nad5	Camellia meiocarpa vs Camellia_drupifera
NA	nad6	Camellia oleifera vs Camellia_drupifera
NA	nad6	Camellia oleifera vs Camellia meiocarpa
NA	nad6	Camellia meiocarpa vs Camellia_drupifera
0	nad7	Camellia oleifera vs Camellia_drupifera
NA	nad7	Camellia oleifera vs Camellia meiocarpa
0	nad7	Camellia meiocarpa vs Camellia_drupifera
NA	nad9	Camellia oleifera vs Camellia_drupifera
NA	nad9	Camellia oleifera vs Camellia meiocarpa
NA	nad9	Camellia meiocarpa vs Camellia_drupifera
NA	rpl10	Camellia oleifera vs Camellia_drupifera
NA	rpl10	Camellia oleifera vs Camellia meiocarpa
NA	rpl10	Camellia meiocarpa vs Camellia_drupifera
NA	rpl16	Camellia oleifera vs Camellia_drupifera
NA	rpl16	Camellia oleifera vs Camellia meiocarpa
NA	rpl16	Camellia meiocarpa vs Camellia_drupifera
NA	rpl2	Camellia oleifera vs Camellia_drupifera
NA	rpl2	Camellia oleifera vs Camellia meiocarpa
NA	rpl2	Camellia meiocarpa vs Camellia_drupifera
NA	rpl5	Camellia oleifera vs Camellia_drupifera
NA	rpl5	Camellia oleifera vs Camellia meiocarpa
NA	rpl5	Camellia meiocarpa vs Camellia_drupifera
NA	rps1	Camellia oleifera vs Camellia_drupifera
NA	rps1	Camellia oleifera vs Camellia meiocarpa
NA	rps1	Camellia meiocarpa vs Camellia_drupifera
NA	rps12	Camellia oleifera vs Camellia_drupifera
NA	rps12	Camellia oleifera vs Camellia meiocarpa
NA	rps12	Camellia meiocarpa vs Camellia_drupifera
NA	rps13	Camellia oleifera vs Camellia_drupifera
NA	rps13	Camellia oleifera vs Camellia meiocarpa
NA	rps13	Camellia meiocarpa vs Camellia_drupifera
NA	rps14	Camellia oleifera vs Camellia_drupifera
NA	rps14	Camellia oleifera vs Camellia meiocarpa
NA	rps14	Camellia meiocarpa vs Camellia_drupifera
NA	rps19	Camellia oleifera vs Camellia_drupifera
NA	rps19	Camellia oleifera vs Camellia meiocarpa
NA	rps19	Camellia meiocarpa vs Camellia_drupifera
0.229506	rps3	Camellia oleifera vs Camellia_drupifera
NA	rps3	Camellia oleifera vs Camellia meiocarpa
0.229506	rps3	Camellia meiocarpa vs Camellia_drupifera
NA	rps4	Camellia oleifera vs Camellia_drupifera
NA	rps4	Camellia oleifera vs Camellia meiocarpa
NA	rps4	Camellia meiocarpa vs Camellia_drupifera
NA	rps7	Camellia oleifera vs Camellia_drupifera
NA	rps7	Camellia oleifera vs Camellia meiocarpa
NA	rps7	Camellia meiocarpa vs Camellia_drupifera
NA	sdh3	Camellia oleifera vs Camellia_drupifera
NA	sdh3	Camellia oleifera vs Camellia meiocarpa
NA	sdh3	Camellia meiocarpa vs Camellia_drupifera
NA	sdh4	Camellia oleifera vs Camellia_drupifera
NA	sdh4	Camellia oleifera vs Camellia meiocarpa
NA	sdh4	Camellia meiocarpa vs Camellia_drupifera

## Sheet: Table S6
Table S6 GC content of different positions from PCGs in three main Tea-oil Camellia species
C. drupifera							C. oleifera							C. meiocarpa
Genes	codon No.	GC1	GC2	GC3	GC_all	ENC	Genes	codon No.	GC1	GC2	GC3	GC_all	ENC	Genes	codon No.	GC1	GC2	GC3	GC_all	ENC	GC3s
atp9	75	50.67	54.67	34.67	46.67	33.62	atp1	510	57.84	42.75	34.31	44.97	52.32	atp1	510	57.84	42.75	34.31	44.97	52.32	34.7
rps13	117	47.01	41.03	23.93	37.32	37.62	atp4	193	46.63	43.01	40.41	43.35	61	atp4	193	46.63	43.01	40.41	43.35	61	41.4
sdh3	107	38.32	35.51	39.25	37.69	46.53	atp6	240	45.83	38.33	29.58	37.92	48.09	atp6	240	45.83	38.33	29.58	37.92	48.09	29.7
nad4L	101	39.6	42.57	31.68	37.95	46.62	atp8	160	36.88	38.75	47.5	41.04	50.42	atp8	160	36.88	38.75	47.5	41.04	50.42	47.4
nad3	119	42.02	45.38	33.61	40.34	46.85	atp9	75	50.67	54.67	34.67	46.67	33.62	atp9	75	50.67	54.67	34.67	46.67	33.62	34.7
nad7	395	55.44	44.81	31.9	44.05	46.93	ccmB	207	46.38	45.41	34.3	42.03	54.42	ccmB	207	46.38	45.41	34.3	42.03	54.42	34.5
mttB	116	46.55	41.38	47.41	45.11	47.78	ccmC	251	47.41	48.61	35.46	43.82	48.97	ccmC	251	47.41	48.61	35.46	43.82	48.97	35.7
cox2	264	52.27	39.77	30.3	40.78	48.05	ccmFc	439	49.43	45.33	43.28	46.01	56.14	ccmFc	439	49.43	45.33	43.28	46.01	56.14	43.5
atp6	240	45.83	38.33	29.58	37.92	48.09	ccmFn	599	51.75	48.91	41.24	47.3	53.94	ccmFn	599	51.75	48.91	41.24	47.3	53.94	41
rps19	95	37.89	46.32	33.68	39.3	48.14	cob	394	50.76	41.62	32.49	41.62	50.53	cob	394	50.76	41.62	32.49	41.62	50.53	32.6
rps1	202	46.53	41.09	41.58	43.07	48.29	cox1	528	47.73	45.64	37.69	43.69	53.67	cox1	528	47.73	45.64	37.69	43.69	53.67	37.9
ccmC	251	47.41	48.61	35.46	43.82	48.97	cox2	264	52.27	39.77	30.3	40.78	48.05	cox2	264	52.27	39.77	30.3	40.78	48.05	30
nad2	489	41.31	44.17	34.15	39.88	49.24	cox3	266	53.01	43.61	33.83	43.48	52.12	cox3	266	53.01	43.61	33.83	43.48	52.12	33.6
nad5	671	43.67	43.96	35.92	41.18	50.18	matR	654	52.75	45.87	58.41	52.34	54.69	matR	654	52.75	45.87	58.41	52.34	54.69	58.6
atp8	160	36.88	39.38	47.5	41.25	50.48	mttB	116	46.55	41.38	47.41	45.11	47.78	mttB	116	46.55	41.38	47.41	45.11	47.78	46
nad1	326	53.99	41.41	30.67	42.02	50.5	nad1	326	53.99	41.41	30.67	42.02	50.5	nad1	326	53.99	41.41	30.67	42.02	50.5	30.9
cob	394	50.76	41.62	32.49	41.62	50.53	nad2	489	41.31	44.17	34.15	39.88	49.24	nad2	489	41.31	44.17	34.15	39.88	49.24	33.9
sdh4	144	40.28	36.11	47.22	41.2	51.67	nad3	119	42.02	45.38	33.61	40.34	46.85	nad3	119	42.02	45.38	33.61	40.34	46.85	33.6
cox3	266	53.01	43.61	33.83	43.48	52.12	nad4	496	44.96	38.91	35.69	39.85	52.37	nad4	496	44.96	38.91	35.69	39.85	52.37	36.3
rpl16	145	50.34	55.86	28.28	44.83	52.17	nad4L	101	39.6	42.57	31.68	37.95	46.62	nad4L	101	39.6	42.57	31.68	37.95	46.62	32.3
rpl10	163	47.24	42.94	36.81	42.33	52.2	nad5	671	43.67	43.96	35.92	41.18	50.18	nad5	671	43.67	43.96	35.92	41.18	50.18	36
atp1	510	57.84	42.55	34.31	44.9	52.35	nad6	206	43.2	37.38	39.32	39.97	52.96	nad6	206	43.2	37.38	39.32	39.97	52.96	38.6
nad4	496	44.96	38.91	35.69	39.85	52.37	nad7	395	55.44	44.81	31.65	43.97	46.98	nad7	395	55.44	44.81	31.65	43.97	46.98	31.6
nad6	206	43.2	37.38	39.32	39.97	52.96	nad9	191	51.31	41.36	34.03	42.23	55.85	nad9	191	51.31	41.36	34.03	42.23	55.85	34.4
cox1	528	47.73	45.64	37.88	43.75	53.77	rpl10	163	47.24	42.94	36.81	42.33	52.2	rpl10	163	47.24	42.94	36.81	42.33	52.2	36.9
ccmFn	599	51.75	48.91	41.24	47.3	53.94	rpl16	145	50.34	55.86	28.28	44.83	52.17	rpl16	145	50.34	55.86	28.28	44.83	52.17	29.4
rps12	126	53.97	49.21	30.95	44.71	54.2	rpl2	336	50.3	53.57	49.7	51.19	54.93	rpl2	336	50.3	53.57	49.7	51.19	54.93	50.3
rps14	101	43.56	45.54	35.64	41.58	54.4	rpl5	188	48.94	37.77	41.49	42.73	54.99	rpl5	188	48.94	37.77	41.49	42.73	54.99	41.5
ccmB	207	46.38	45.41	34.3	42.03	54.42	rps1	202	46.53	41.09	41.58	43.07	48.29	rps1	202	46.53	41.09	41.58	43.07	48.29	41.7
matR	656	52.9	45.88	58.38	52.39	54.61	rps12	126	53.97	49.21	30.95	44.71	54.2	rps12	126	53.97	49.21	30.95	44.71	54.2	32.8
rpl2	336	50.3	53.57	49.7	51.19	54.93	rps13	117	47.01	41.03	24.79	37.61	37.79	rps13	117	47.01	41.03	24.79	37.61	37.79	23.9
rpl5	188	48.94	37.77	41.49	42.73	54.99	rps14	101	43.56	45.54	35.64	41.58	54.4	rps14	101	43.56	45.54	35.64	41.58	54.4	36.5
rps4	353	41.08	41.93	35.41	39.47	55.26	rps19	95	37.89	46.32	33.68	39.3	48.14	rps19	95	37.89	46.32	33.68	39.3	48.14	35.6
nad9	191	51.31	41.36	34.03	42.23	55.85	rps3	564	45.21	41.49	43.79	43.5	56.63	rps3	564	45.21	41.49	43.79	43.5	56.63	44.3
ccmFc	439	49.43	45.33	43.28	46.01	56.14	rps4	353	41.08	42.21	35.41	39.57	55.31	rps4	353	41.08	42.21	35.41	39.57	55.31	36
rps3	564	45.04	41.49	43.79	43.44	56.7	rps7	149	51.68	40.27	35.57	42.51	59.99	rps7	149	51.68	40.27	35.57	42.51	59.99	34.8
rps7	149	51.68	40.27	35.57	42.51	59.99	sdh3	107	38.32	35.51	39.25	37.69	46.53	sdh3	107	38.32	35.51	39.25	37.69	46.53	40.4
atp4	193	46.63	43.01	40.41	43.35	61	sdh4	144	40.28	36.81	47.22	41.44	51.63	sdh4	144	40.28	36.81	47.22	41.44	51.63	47.8

## Sheet: Table S7
Table S7 Fragments transferred from chloroplasts to mitochondria in three main Tea-oil Camellia species
Camellia drupifera	Chloroplast	1	99.467	9572	3	11	100337	109890	187302	196843	0	17350	rps12(trans_splicing)(partical:74.81%);trnV-GAC;rrn16;trnI-GAU;trnA-UGC;rrn23;rrn4.5(partical:16.50%)	trnV-GAC;trnI-GAT;trnA-TGC
	Chloroplast	1	99.467	1689	1	1	155251	156939	459958	458278	0	3062	rpl23(partical:46.10%);rpl2
	Chloroplast	1	99.467	1689	1	1	86713	88401	458278	459958	0	3062	rpl2;rpl23(partical:46.10%)
	Chloroplast	1	87.169	982	82	19	66276	67217	266210	265233	0	1075	psbJ;psbL;psbF;psbE
	Chloroplast	1	85.504	1021	85	32	68281	69295	264847	263884	0	1007	petL;petG;trnW-CCA;trnP-UGG	trnW-CCA;trnW-CCA
	Chloroplast	1	81.926	758	99	19	51363	52105	179421	180155	3.25e-172	606	ndhJ;ndhK(partical:23.16%)
	Chloroplast	1	86.337	505	38	9	54541	55027	578532	579023	1.21e-146	521	atpE(partical:90.55%);atpB(partical:8.48%)
	Chloroplast	1	81.971	416	41	18	25898	26287	271794	271387	1.32e-86	322	rpoB(partical:12.14%)
	Chloroplast	1	74.045	890	174	42	139520	140383	456384	455526	2.85e-83	311	rrn16(partical:57.99%)	rrn18(partical:44.51%)
	Chloroplast	1	74.045	890	174	42	103269	104132	455526	456384	2.85e-83	311	rrn16(partical:57.99%)	rrn18(partical:44.51%)
	Chloroplast	1	95.918	147	6	0	36637	36783	550652	550798	1.36e-61	239	psbC(partical:10.34%)
	Chloroplast	1	91.275	149	13	0	31883	32031	109821	109969	4.98e-51	204	trnD-GUC	trnD-GTC
	Chloroplast	1	92.913	127	9	0	154860	154986	60770	60644	1.8e-45	185	trnI-CAU	trnM-CAT
	Chloroplast	1	92.913	127	9	0	88666	88792	60644	60770	1.8e-45	185	trnI-CAU	trnM-CAT
	Chloroplast	1	88.889	126	8	2	149246	149371	728101	727982	6.58e-35	150	ycf2(partical:1.83%)
	Chloroplast	1	88.889	126	8	2	94281	94406	727982	728101	6.58e-35	150	ycf2(partical:1.83%)
	Chloroplast	1	90.517	116	4	1	108480	108595	54779	54671	8.51e-34	147	rrn23(partical:4.13%)
	Chloroplast	1	90.517	116	4	1	135057	135172	54671	54779	8.51e-34	147	rrn23(partical:4.13%)
	Chloroplast	1	96.429	84	2	1	132349	132431	537863	537780	5.12e-31	137	trnN-GUU	trnN-GTT
	Chloroplast	1	96.429	84	2	1	111221	111303	537780	537863	5.12e-31	137	trnN-GUU	trnN-GTT
	Chloroplast	1	97.368	76	2	0	88717	88792	150709	150634	8.57e-29	130	trnI-CAU	ccmC(partical:1.86%);trnM-CAT
	Chloroplast	1	97.368	76	2	0	154860	154935	150634	150709	8.57e-29	130	trnI-CAU	ccmC(partical:1.86%);trnM-CAT
	Chloroplast	1	93.506	77	5	0	54227	54303	547566	547642	2.4e-24	115	trnM-CAU	trnM-CAT
	Chloroplast	1	100	42	0	0	122881	122922	187933	187974	3.15e-13	78.7	ndhA(partical:1.92%)
	Chloroplast	1	90.566	53	5	0	150673	150725	800812	800760	5.27e-11	71.3	ycf2(partical:0.77%)
	Chloroplast	1	90.566	53	5	0	92927	92979	800760	800812	5.27e-11	71.3	ycf2(partical:0.77%)
	Chloroplast	1	97.059	34	1	0	76213	76246	641312	641279	4.1e-07	58.4	psbB(partical:2.23%)
	Chloroplast	1	96.875	32	1	0	31989	32020	808575	808544	5.31e-06	54.7	trnD-GUC(partical:41.89%)
	Chloroplast	2	90.385	52	1	3	155041	155092	15341	15294	2.45e-09	65.8
	Chloroplast	2	90.385	52	1	3	88560	88611	15294	15341	2.45e-09	65.8
	Chloroplast	2	97.297	37	0	1	144192	144228	35727	35692	3.17e-08	62.1
	Chloroplast	2	97.297	37	0	1	99424	99460	35692	35727	3.17e-08	62.1
	Chloroplast	2	97.059	34	1	0	76213	76246	19745	19712	4.1e-07	58.4	psbB(partical:2.23%)
	query-chl	subject-mt	percentage of identical matches	length	number of mismatches	number of gap openings	start of alignment in query	end of alignment in query	start of alignment in subject	end of alignment in subject	expect value	bitscore	gene(cp)	gene(mt)
C. oleifera	Chloroplast	1	100	9572	0	0	133257	142828	776195	766624	0	17677	rps12(trans_splicing)(partical:74.81%);rrn4.5(partical:16.50%);rrn23;trnA-UGC;trnI-GAU;rrn16;trnV-GAC	trnV-GAC;trnI-GAT;trnA-TGC
	Chloroplast	1	100	9572	0	0	99909	109480	766624	776195	0	17677	rps12(trans_splicing)(partical:74.81%);trnV-GAC;rrn16;trnI-GAU;trnA-UGC;rrn23;rrn4.5(partical:16.50%)	trnV-GAC;trnI-GAT;trnA-TGC
	Chloroplast	1	99.941	1689	1	0	86285	87973	21994	20306	0	3114	rpl2;rpl23(partical:46.10%)
	Chloroplast	1	99.941	1689	1	0	154764	156452	20306	21994	0	3114	rpl23(partical:46.10%);rpl2
	Chloroplast	1	89.797	1333	94	24	65837	67146	950071	951384	0	1670	psbJ;psbL;psbF;psbE
	Chloroplast	1	95.247	1052	30	10	67812	68862	951418	952450	0	1648	petL;petG;trnW-CCA;trnP-UGG	trnW-CCA;trnP-TGG
	Chloroplast	1	81.926	758	99	19	50935	51677	758733	759467	3.18e-172	606	ndhJ;ndhK(partical:23.16%)
	Chloroplast	1	86.337	505	38	9	54110	54596	447171	447662	1.18e-146	521	atpE(partical:90.55%);atpB(partical:8.48%)
	Chloroplast	1	81.971	416	41	18	25471	25860	944488	944895	1.29e-86	322	rpoB(partical:12.14%)
	Chloroplast	1	74.045	890	174	42	102859	103722	24744	23886	2.79e-83	311	rrn16(partical:57.99%)	rrn18(partical:44.51%)
	Chloroplast	1	74.045	890	174	42	139015	139878	23886	24744	2.79e-83	311	rrn16(partical:57.99%)	rrn18(partical:44.51%)
	Chloroplast	1	95.918	147	6	0	36219	36365	231290	231436	1.34e-61	239	psbC(partical:10.34%)
	Chloroplast	1	91.275	149	13	0	31456	31604	124235	124087	4.87e-51	204	trnD-GUC	trnD-GTC
	Chloroplast	1	93.701	127	8	0	154373	154499	911256	911130	3.8e-47	191	trnI-CAU	trnM-CAT
	Chloroplast	1	93.701	127	8	0	88238	88364	911130	911256	3.8e-47	191	trnI-CAU	trnM-CAT
	Chloroplast	1	88.889	126	8	2	148759	148884	332777	332658	6.44e-35	150	ycf2(partical:1.83%)
	Chloroplast	1	88.889	126	8	2	93853	93978	332658	332777	6.44e-35	150	ycf2(partical:1.83%)
	Chloroplast	1	90.517	116	4	1	108070	108185	905266	905158	8.33e-34	147	rrn23(partical:4.13%)
	Chloroplast	1	90.517	116	4	1	134552	134667	905158	905266	8.33e-34	147	rrn23(partical:4.13%)
	Chloroplast	1	96.429	84	2	1	110817	110899	258030	257947	5.01e-31	137	trnN-GUU	trnN-GTT
	Chloroplast	1	96.429	84	2	1	131838	131920	257947	258030	5.01e-31	137	trnN-GUU	trnN-GTT
	Chloroplast	1	97.368	76	2	0	88289	88364	730050	729975	8.39e-29	130	trnI-CAU	ccmC(partical:1.86%);trnM-CAT
	Chloroplast	1	97.368	76	2	0	154373	154448	729975	730050	8.39e-29	130	trnI-CAU	ccmC(partical:1.86%);trnM-CAT
	Chloroplast	1	93.506	77	5	0	53796	53872	228218	228294	2.35e-24	115	trnM-CAU	trnM-CAT
	Chloroplast	1	100	42	0	0	122377	122418	767255	767296	3.08e-13	78.7	ndhA(partical:1.92%)
	Chloroplast	1	90.385	52	1	3	154554	154605	724037	723990	2.4e-09	65.8
	Chloroplast	1	90.385	52	1	3	88132	88183	723990	724037	2.4e-09	65.8
	Chloroplast	1	97.297	37	0	1	143705	143741	459134	459099	3.1e-08	62.1
	Chloroplast	1	97.297	37	0	1	98996	99032	459099	459134	3.1e-08	62.1
	Chloroplast	1	97.059	34	1	0	75781	75814	664203	664236	4.02e-07	58.4	psbB(partical:2.23%)
	Chloroplast	1	96.875	32	1	0	31562	31593	380256	380225	5.2e-06	54.7	trnD-GUC(partical:41.89%)
	query-chl	subject-mt	percentage of identical matches	length	number of mismatches	number of gap openings	start of alignment in query	end of alignment in query	start of alignment in subject	end of alignment in subject	expect value	bitscore	gene(cp)	gene(mt)
C. meiocarpa	Chloroplast	1	100	9572	0	0	133257	142828	108886	99315	0	17677	rps12(trans_splicing)(partical:74.81%);rrn4.5(partical:16.50%);rrn23;trnA-UGC;trnI-GAU;rrn16;trnV-GAC	trnV-GAC;trnI-GAT;trnA-TGC
	Chloroplast	1	100	9572	0	0	99909	109480	99315	108886	0	17677	rps12(trans_splicing)(partical:74.81%);trnV-GAC;rrn16;trnI-GAU;trnA-UGC;rrn23;rrn4.5(partical:16.50%)	trnV-GAC;trnI-GAT;trnA-TGC
	Chloroplast	1	86.338	1054	92	28	67815	68862	431062	430055	0	1101	petL;petG;trnW-CCA;trnP-UGG	trnP-TGG;trnW-CCA
	Chloroplast	1	86.182	977	87	23	65837	66778	432382	431419	0	1013	psbJ;psbL;psbF;psbE
	Chloroplast	1	81.926	758	99	19	50935	51677	91424	92158	3.08e-172	606	ndhJ;ndhK(partical:23.16%)
	Chloroplast	1	86.337	505	38	9	54110	54596	182581	183072	1.15e-146	521	atpE(partical:90.55%);atpB(partical:8.48%)
	Chloroplast	1	81.971	416	41	18	25471	25860	437965	437558	1.25e-86	322	rpoB(partical:12.14%)
	Chloroplast	1	93.701	127	8	0	88238	88364	471323	471197	3.67e-47	191	trnI-CAU	trnM-CAT
	Chloroplast	1	93.701	127	8	0	154373	154499	471197	471323	3.67e-47	191	trnI-CAU	trnM-CAT
	Chloroplast	1	88.889	126	8	2	93853	93978	39887	39768	6.23e-35	150	ycf2(partical:1.83%)
	Chloroplast	1	88.889	126	8	2	148759	148884	39768	39887	6.23e-35	150	ycf2(partical:1.83%)
	Chloroplast	1	90.517	116	4	1	134552	134667	477295	477187	8.06e-34	147	rrn23(partical:4.13%)
	Chloroplast	1	90.517	116	4	1	108070	108185	477187	477295	8.06e-34	147	rrn23(partical:4.13%)
	Chloroplast	1	97.368	76	2	0	88289	88364	62741	62666	8.12e-29	130	trnI-CAU	ccmC(partical:1.86%);trnM-CAT
	Chloroplast	1	97.368	76	2	0	154373	154448	62666	62741	8.12e-29	130	trnI-CAU	ccmC(partical:1.86%);trnM-CAT
	Chloroplast	1	100	42	0	0	122377	122418	99946	99987	2.98e-13	78.7	ndhA(partical:1.92%)
	Chloroplast	1	90.385	52	1	3	154554	154605	56728	56681	2.32e-09	65.8
	Chloroplast	1	90.385	52	1	3	88132	88183	56681	56728	2.32e-09	65.8
	Chloroplast	1	93.023	43	2	1	98996	99038	561133	561092	3.01e-08	62.1
	Chloroplast	1	93.023	43	2	1	143699	143741	561092	561133	3.01e-08	62.1
	Chloroplast	1	97.059	34	1	0	75781	75814	577095	577128	3.89e-07	58.4	psbB(partical:2.23%)
	Chloroplast	2	100	1689	0	0	86285	87973	21625	19937	0	3120	rpl2;rpl23(partical:46.10%)
	Chloroplast	2	100	1689	0	0	154764	156452	19937	21625	0	3120	rpl23(partical:46.10%);rpl2
	Chloroplast	2	74.045	890	174	42	102859	103722	24375	23517	2.7e-83	311	rrn16(partical:57.99%)	rrn18(partical:44.51%)
	Chloroplast	2	74.045	890	174	42	139015	139878	23517	24375	2.7e-83	311	rrn16(partical:57.99%)	rrn18(partical:44.51%)
	Chloroplast	2	95.918	147	6	0	36219	36365	305858	305712	1.29e-61	239	psbC(partical:10.34%)
	Chloroplast	2	91.275	149	13	0	31456	31604	131860	131712	4.72e-51	204	trnD-GUC	trnD-GTC
	Chloroplast	2	96.429	84	2	1	131838	131920	279201	279118	4.85e-31	137	trnN-GUU	trnN-GTT
	Chloroplast	2	96.429	84	2	1	110817	110899	279118	279201	4.85e-31	137	trnN-GUU	trnN-GTT
	Chloroplast	2	93.506	77	5	0	53796	53872	308930	308854	2.27e-24	115	trnM-CAU	trnM-CAT
	Chloroplast	2	97.561	41	1	0	150036	150076	70351	70311	4.99e-11	71.3	ycf2(partical:0.60%)
	Chloroplast	2	97.561	41	1	0	92661	92701	70311	70351	4.99e-11	71.3	ycf2(partical:0.60%)

## Sheet: Table S8
TableS8 The accession numbers of Genbank used to infer the phylogenetic trees
	Mitochondrial	Chloroplast
Arabidopsis thaliana	JF729201	MZ323108
Brassica rapa	MT409179	MT726210
Camellia drupifera	PQ041261-PQ041262	PP155502
Camellia gigantocarpa	OP270590	MZ054232
Camellia nitidissima	ON645224	MH382827
Camellia sinensis var. assamica	MK574876-MK574877	OL450397
Camellia sinensis var. assamica	OL989850	OL450397
Camellia sinensis	MH376284	OL450428
Camellia sinensis	OM809792	ON060661
Helianthus annuus	NC023337	NC_007977
Nicotiana tabacum	MN651324	PP354876
Platycodon grandiflorus	NC035958	OP018680
Solanum lycopersicum	NC035963	NC_007898
Solanum tuberosum	MN104801	NC_008096
Stewartia gemmate	OQ948158	OQ948159

## Sheet: Table S9
Table S9 The details of polymorphic sites in three Tea-oil Camellia species
Chr	Pos	Ref	Alt	Camellia meiocarpa	Camellia_drupifera	feature	Regions
Camellia oleifera	649	C	CCTTTTCTTTT	C	CCTTTTCTTTT	INDEL	IGS(nad9,cox1)
Camellia oleifera	995	CGGTCA	C	CGGTCA	C	INDEL	IGS(nad9,cox1)
Camellia oleifera	1094	G	T	G	T	SNP	IGS(nad9,cox1)
Camellia oleifera	1241	CTTTAAT	C	CTTTAAT	C	INDEL	IGS(nad9,cox1)
Camellia oleifera	1747	A	C	A	C	SNP	cox1
Camellia oleifera	3180	C	A	C	A	SNP	IGS(cox1,rrn5)
Camellia oleifera	5055	G	T	G	T	SNP	IGS(cox1,rrn5)
Camellia oleifera	6354	G	GGACTTTA	G	GGACTTTA	INDEL	IGS(cox1,rrn5)
Camellia oleifera	6965	T	TGTATA	T	TGTATA	INDEL	IGS(cox1,rrn5)
Camellia oleifera	15160	T	G	T	G	SNP	IGS(cox1,rrn5)
Camellia oleifera	15173	A	C	A	C	SNP	IGS(cox1,rrn5)
Camellia oleifera	15196	G	T	G	T	SNP	IGS(cox1,rrn5)
Camellia oleifera	17685	A	AGTGAT	A	AGTGAT	INDEL	IGS(cox1,rrn5)
Camellia oleifera	18607	G	T	G	T	SNP	IGS(cox1,rrn5)
Camellia oleifera	19221	T	G	T	G	SNP	IGS(cox1,rrn5)
Camellia oleifera	19308	GGAGAAA	G	GGAGAAA	G	INDEL	IGS(cox1,rrn5)
Camellia oleifera	19532	G	A	G	A	SNP	IGS(cox1,rrn5)
Camellia oleifera	20284	C	T	T	C	SNP	IGS(cox1,rrn5)
Camellia oleifera	20404	A	C	C	A	SNP	IGS(cox1,rrn5)
Camellia oleifera	20839	CTTTGAGTG	C	CTTTGAGTG	C	INDEL	IGS(cox1,rrn5)
Camellia oleifera	22051	G	T	G	T	SNP	IGS(cox1,rrn5)
Camellia oleifera	22272	G	T	G	T	SNP	IGS(cox1,rrn5)
Camellia oleifera	22343	T	G	T	G	SNP	IGS(cox1,rrn5)
Camellia oleifera	22602	G	GCCCCTTT	G	GCCCCTTT	INDEL	IGS(rrn5,rrn18)
Camellia oleifera	22698	C	A	C	A	SNP	IGS(rrn5,rrn18)
Camellia oleifera	26125	C	CTAAACA	C	CTAAACA	INDEL	IGS(rrn18,rpl2)
Camellia oleifera	26520	A	G	A	G	SNP	IGS(rrn18,rpl2)
Camellia oleifera	28427	C	T	C	T	SNP	IGS(rrn18,rpl2)
Camellia oleifera	30199	CTTTAA	C	CTTTAA	C	INDEL	IGS(rrn18,rpl2)
Camellia oleifera	37150	A	ATGGTAC	A	ATGGTAC	INDEL	IGS(rrn18,rpl2)
Camellia oleifera	37632	C	A	C	A	SNP	IGS(rrn18,rpl2)
Camellia oleifera	39332	T	TTATTAA	T	TTATTAA	INDEL	rpl2-intron1
Camellia oleifera	41693	T	A	T	A	SNP	rps3-intron1
Camellia oleifera	42273	CTT	C	CTT	C	INDEL	rps3-intron1
Camellia oleifera	44897	G	A	G	A	SNP	rps3-exon2
Camellia oleifera	45520	T	A	T	A	SNP	IGS(rpl16,rps1)
Camellia oleifera	45526	A	C	A	C	SNP	IGS(rpl16,rps1)
Camellia oleifera	46117	T	G	T	G	SNP	IGS(rpl16,rps1)
Camellia oleifera	46942	C	A	C	A	SNP	IGS(rpl16,rps1)
Camellia oleifera	46943	T	G	T	G	SNP	IGS(rpl16,rps1)
Camellia oleifera	47429	A	AGTGAGT	A	AGTGAGT	INDEL	IGS(rpl16,rps1)
Camellia oleifera	49079	ATATGT	A	ATATGT	A	INDEL	IGS(rpl16,rps1)
Camellia oleifera	50415	C	CTGATATA	C	CTGATATA	INDEL	IGS(rpl16,rps1)
Camellia oleifera	50975	C	A	C	A	SNP	IGS(rpl16,rps1)
Camellia oleifera	51857	TA	T	TA	T	INDEL	IGS(rpl16,rps1)
Camellia oleifera	52499	C	CTTATT	C	CTTATT	INDEL	IGS(rpl16,rps1)
Camellia oleifera	53674	A	C	A	C	SNP	IGS(rpl16,rps1)
Camellia oleifera	53894	A	AC	A	AC	INDEL	IGS(rpl16,rps1)
Camellia oleifera	54729	C	T	C	T	SNP	IGS(rpl16,rps1)
Camellia oleifera	54738	A	C	A	C	SNP	IGS(rpl16,rps1)
Camellia oleifera	54755	C	CAGTATA	C	CAGTATA	INDEL	IGS(rpl16,rps1)
Camellia oleifera	55585	T	G	T	G	SNP	IGS(rpl16,rps1)
Camellia oleifera	57498	G	A	G	A	SNP	IGS(rpl16,rps1)
Camellia oleifera	57523	C	T	C	T	SNP	IGS(rpl16,rps1)
Camellia oleifera	57546	A	G	A	G	SNP	IGS(rpl16,rps1)
Camellia oleifera	57564	A	G	A	G	SNP	IGS(rpl16,rps1)
Camellia oleifera	57631	G	A	G	A	SNP	IGS(rpl16,rps1)
Camellia oleifera	57758	G	A	G	A	SNP	IGS(rpl16,rps1)
Camellia oleifera	57917	C	T	C	T	SNP	IGS(rpl16,rps1)
Camellia oleifera	58042	G	A	G	A	SNP	IGS(rpl16,rps1)
Camellia oleifera	58491	G	A	G	A	SNP	IGS(rpl16,rps1)
Camellia oleifera	58761	C	G	C	G	SNP	IGS(rpl16,rps1)
Camellia oleifera	59068	C	CATATA	C	CATATA	INDEL	IGS(rpl16,rps1)
Camellia oleifera	59126	A	T	A	T	SNP	IGS(rpl16,rps1)
Camellia oleifera	59141	C	T	C	T	SNP	IGS(rpl16,rps1)
Camellia oleifera	59218	C	T	C	T	SNP	IGS(rpl16,rps1)
Camellia oleifera	59248	C	T	C	T	SNP	IGS(rpl16,rps1)
Camellia oleifera	59250	G	A	G	A	SNP	IGS(rpl16,rps1)
Camellia oleifera	59464	G	A	G	A	SNP	IGS(rpl16,rps1)
Camellia oleifera	59484	G	A	G	A	SNP	IGS(rpl16,rps1)
Camellia oleifera	59712	G	A	G	A	SNP	IGS(rpl16,rps1)
Camellia oleifera	59783	G	A	G	A	SNP	IGS(rpl16,rps1)
Camellia oleifera	59930	G	T	G	T	SNP	IGS(rpl16,rps1)
Camellia oleifera	59976	G	T	G	T	SNP	IGS(rpl16,rps1)
Camellia oleifera	60001	C	T	C	T	SNP	IGS(rpl16,rps1)
Camellia oleifera	60010	G	C	G	C	SNP	IGS(rpl16,rps1)
Camellia oleifera	60086	T	C	T	C	SNP	IGS(rpl16,rps1)
Camellia oleifera	60090	C	G	C	G	SNP	IGS(rpl16,rps1)
Camellia oleifera	60240	G	A	G	A	SNP	IGS(rpl16,rps1)
Camellia oleifera	60288	C	T	C	T	SNP	IGS(rpl16,rps1)
Camellia oleifera	60289	T	G	T	G	SNP	IGS(rpl16,rps1)
Camellia oleifera	60306	C	T	C	T	SNP	IGS(rpl16,rps1)
Camellia oleifera	60357	T	C	T	C	SNP	IGS(rpl16,rps1)
Camellia oleifera	60473	G	T	G	T	SNP	IGS(rpl16,rps1)
Camellia oleifera	60486	G	A	G	A	SNP	IGS(rpl16,rps1)
Camellia oleifera	60493	C	T	C	T	SNP	IGS(rpl16,rps1)
Camellia oleifera	60515	C	A	C	A	SNP	IGS(rpl16,rps1)
Camellia oleifera	60527	C	T	C	T	SNP	IGS(rpl16,rps1)
Camellia oleifera	60689	G	T	G	T	SNP	IGS(rpl16,rps1)
Camellia oleifera	60703	C	T	C	T	SNP	IGS(rpl16,rps1)
Camellia oleifera	60777	G	T	G	T	SNP	IGS(rpl16,rps1)
Camellia oleifera	60977	T	C	T	C	SNP	IGS(rpl16,rps1)
Camellia oleifera	61214	G	A	G	A	SNP	IGS(rpl16,rps1)
Camellia oleifera	61221	G	A	G	A	SNP	IGS(rpl16,rps1)
Camellia oleifera	61271	G	T	G	T	SNP	IGS(rpl16,rps1)
Camellia oleifera	61285	C	A	C	A	SNP	IGS(rpl16,rps1)
Camellia oleifera	61299	G	A	G	A	SNP	IGS(rpl16,rps1)
Camellia oleifera	61641	A	G	A	G	SNP	IGS(rpl16,rps1)
Camellia oleifera	61722	G	A	G	A	SNP	IGS(rpl16,rps1)
Camellia oleifera	61856	G	A	G	A	SNP	IGS(rpl16,rps1)
Camellia oleifera	61969	G	T	G	T	SNP	IGS(rpl16,rps1)
Camellia oleifera	62044	G	T	G	T	SNP	IGS(rpl16,rps1)
Camellia oleifera	62132	G	A	G	A	SNP	IGS(rpl16,rps1)
Camellia oleifera	62153	C	T	C	T	SNP	IGS(rpl16,rps1)
Camellia oleifera	62210	C	T	C	T	SNP	IGS(rpl16,rps1)
Camellia oleifera	62305	C	T	C	T	SNP	IGS(rpl16,rps1)
Camellia oleifera	62383	C	T	C	T	SNP	IGS(rpl16,rps1)
Camellia oleifera	62415	C	T	C	T	SNP	IGS(rpl16,rps1)
Camellia oleifera	62443	G	A	G	A	SNP	IGS(rpl16,rps1)
Camellia oleifera	62754	C	G	C	G	SNP	IGS(rpl16,rps1)
Camellia oleifera	62762	G	A	G	A	SNP	IGS(rpl16,rps1)
Camellia oleifera	62793	C	T	C	T	SNP	IGS(rpl16,rps1)
Camellia oleifera	62819	A	C	A	C	SNP	IGS(rpl16,rps1)
Camellia oleifera	62979	C	T	C	T	SNP	IGS(rpl16,rps1)
Camellia oleifera	62998	G	T	G	T	SNP	IGS(rpl16,rps1)
Camellia oleifera	63027	C	T	C	T	SNP	IGS(rpl16,rps1)
Camellia oleifera	63031	C	T	C	T	SNP	IGS(rpl16,rps1)
Camellia oleifera	63052	G	A	G	A	SNP	IGS(rpl16,rps1)
Camellia oleifera	63073	C	T	C	T	SNP	IGS(rpl16,rps1)
Camellia oleifera	63166	G	T	G	T	SNP	IGS(rpl16,rps1)
Camellia oleifera	63583	C	T	C	T	SNP	IGS(rpl16,rps1)
Camellia oleifera	63658	C	CCTTTTA	C	CCTTTTA	INDEL	IGS(rpl16,rps1)
Camellia oleifera	63752	C	A	C	A	SNP	IGS(rpl16,rps1)
Camellia oleifera	63942	G	C	G	C	SNP	IGS(rpl16,rps1)
Camellia oleifera	64046	G	T	G	T	SNP	IGS(rpl16,rps1)
Camellia oleifera	64108	T	C	T	C	SNP	IGS(rpl16,rps1)
Camellia oleifera	64326	C	T	C	T	SNP	IGS(rpl16,rps1)
Camellia oleifera	64353	C	T	C	T	SNP	IGS(rpl16,rps1)
Camellia oleifera	64443	G	A	G	A	SNP	IGS(rpl16,rps1)
Camellia oleifera	64597	T	C	T	C	SNP	IGS(rpl16,rps1)
Camellia oleifera	64698	G	A	G	A	SNP	IGS(rpl16,rps1)
Camellia oleifera	64761	C	T	C	T	SNP	IGS(rpl16,rps1)
Camellia oleifera	64815	CT	C	C	C	INDEL	IGS(rpl16,rps1)
Camellia oleifera	64834	T	G	T	G	SNP	IGS(rpl16,rps1)
Camellia oleifera	65093	C	T	C	T	SNP	IGS(rpl16,rps1)
Camellia oleifera	65138	G	A	G	A	SNP	IGS(rpl16,rps1)
Camellia oleifera	65294	T	C	T	C	SNP	IGS(rpl16,rps1)
Camellia oleifera	65363	G	A	G	A	SNP	IGS(rpl16,rps1)
Camellia oleifera	65986	A	T	A	T	SNP	IGS(rpl16,rps1)
Camellia oleifera	66082	G	A	G	A	SNP	IGS(rpl16,rps1)
Camellia oleifera	66145	GA	G	GA	G	INDEL	IGS(rpl16,rps1)
Camellia oleifera	66177	T	C	T	C	SNP	IGS(rpl16,rps1)
Camellia oleifera	66489	C	G	C	G	SNP	IGS(rpl16,rps1)
Camellia oleifera	66685	G	A	G	A	SNP	IGS(rpl16,rps1)
Camellia oleifera	66957	A	C	A	C	SNP	IGS(rpl16,rps1)
Camellia oleifera	66980	C	T	C	T	SNP	IGS(rpl16,rps1)
Camellia oleifera	67187	C	T	C	T	SNP	IGS(rpl16,rps1)
Camellia oleifera	67283	A	G	A	G	SNP	IGS(rpl16,rps1)
Camellia oleifera	67293	C	T	C	T	SNP	IGS(rpl16,rps1)
Camellia oleifera	67368	CCTTTAT	C	CCTTTAT	C	INDEL	IGS(rpl16,rps1)
Camellia oleifera	67539	TTA	T	TTA	T	INDEL	IGS(rpl16,rps1)
Camellia oleifera	67804	AG	A	AG	A	INDEL	IGS(rpl16,rps1)
Camellia oleifera	67813	G	A	G	A	SNP	IGS(rpl16,rps1)
Camellia oleifera	67841	C	T	C	T	SNP	IGS(rpl16,rps1)
Camellia oleifera	67861	G	A	G	A	SNP	IGS(rpl16,rps1)
Camellia oleifera	68027	C	T	C	T	SNP	IGS(rpl16,rps1)
Camellia oleifera	68235	G	A	G	A	SNP	IGS(rpl16,rps1)
Camellia oleifera	68404	G	A	G	A	SNP	IGS(rpl16,rps1)
Camellia oleifera	68436	G	T	G	T	SNP	IGS(rpl16,rps1)
Camellia oleifera	68623	C	CCAATA	C	CCAATA	INDEL	IGS(rpl16,rps1)
Camellia oleifera	68864	C	T	C	T	SNP	IGS(rpl16,rps1)
Camellia oleifera	68943	G	A	G	A	SNP	IGS(rpl16,rps1)
Camellia oleifera	68945	A	T	A	T	SNP	IGS(rpl16,rps1)
Camellia oleifera	68955	C	T	C	T	SNP	IGS(rpl16,rps1)
Camellia oleifera	68988	C	T	C	T	SNP	IGS(rpl16,rps1)
Camellia oleifera	69159	A	T	A	T	SNP	IGS(rpl16,rps1)
Camellia oleifera	69227	C	T	C	T	SNP	IGS(rpl16,rps1)
Camellia oleifera	69271	C	A	C	A	SNP	IGS(rpl16,rps1)
Camellia oleifera	69294	A	G	A	G	SNP	IGS(rpl16,rps1)
Camellia oleifera	69318	A	G	A	G	SNP	IGS(rpl16,rps1)
Camellia oleifera	69419	C	T	C	T	SNP	IGS(rpl16,rps1)
Camellia oleifera	69420	C	T	C	T	SNP	IGS(rpl16,rps1)
Camellia oleifera	69505	G	A	G	A	SNP	IGS(rpl16,rps1)
Camellia oleifera	69573	G	A	G	A	SNP	IGS(rpl16,rps1)
Camellia oleifera	74030	G	C	G	C	SNP	IGS(rpl16,rps1)
Camellia oleifera	74032	C	T	C	T	SNP	IGS(rpl16,rps1)
Camellia oleifera	74150	C	CTTAAT	C	CTTAAT	INDEL	IGS(rpl16,rps1)
Camellia oleifera	74194	G	A	G	A	SNP	IGS(rpl16,rps1)
Camellia oleifera	74394	C	T	C	T	SNP	IGS(rpl16,rps1)
Camellia oleifera	74509	G	A	G	A	SNP	IGS(rpl16,rps1)
Camellia oleifera	74587	GACTTAAGCCTTTAGTCCTACC	G	GACTTAAGCCTTTAGTCCTACC	G	INDEL	IGS(rpl16,rps1)
Camellia oleifera	74832	G	A	G	A	SNP	IGS(rpl16,rps1)
Camellia oleifera	75107	T	C	T	C	SNP	IGS(rpl16,rps1)
Camellia oleifera	75294	G	C	G	C	SNP	IGS(rpl16,rps1)
Camellia oleifera	75487	C	CCCAAA	C	CCCAAA	INDEL	IGS(rpl16,rps1)
Camellia oleifera	75652	G	A	G	A	SNP	IGS(rpl16,rps1)
Camellia oleifera	75713	C	T	C	T	SNP	IGS(rpl16,rps1)
Camellia oleifera	75722	G	A	G	A	SNP	IGS(rpl16,rps1)
Camellia oleifera	75817	C	T	C	T	SNP	IGS(rpl16,rps1)
Camellia oleifera	75970	C	T	C	T	SNP	IGS(rpl16,rps1)
Camellia oleifera	80200	A	AGTGAT	A	AGTGAT	INDEL	IGS(rpl16,rps1)
Camellia oleifera	80671	A	C	A	C	SNP	IGS(rpl16,rps1)
Camellia oleifera	81525	T	TGTATC	T	TGTATC	INDEL	IGS(rpl16,rps1)
Camellia oleifera	81779	C	CTTGCT	C	CTTGCT	INDEL	IGS(rpl16,rps1)
Camellia oleifera	81929	C	A	C	A	SNP	IGS(rpl16,rps1)
Camellia oleifera	83595	T	G	T	G	SNP	IGS(rpl16,rps1)
Camellia oleifera	85026	ATTAAAATCGCGAATAAAATAAAAT	A	ATTAAAATCGCGAATAAAATAAAAT	A	INDEL	IGS(rpl16,rps1)
Camellia oleifera	85935	A	C	A	C	SNP	IGS(rpl16,rps1)
Camellia oleifera	86739	T	TGTTCC	T	TGTTCC	INDEL	IGS(rpl16,rps1)
Camellia oleifera	86978	T	G	T	G	SNP	IGS(rpl16,rps1)
Camellia oleifera	87040	A	T	A	T	SNP	IGS(rpl16,rps1)
Camellia oleifera	87121	T	G	T	G	SNP	IGS(rpl16,rps1)
Camellia oleifera	87309	C	CTTTTG	C	CTTTTG	INDEL	IGS(rpl16,rps1)
Camellia oleifera	87630	TTAAAG	T	TTAAAG	T	INDEL	IGS(rpl16,rps1)
Camellia oleifera	88631	G	T	G	T	SNP	IGS(rpl16,rps1)
Camellia oleifera	88792	G	T	G	T	SNP	IGS(rpl16,rps1)
Camellia oleifera	88798	T	G	T	G	SNP	IGS(rpl16,rps1)
Camellia oleifera	90868	C	CTTTT	C	CTTTT	INDEL	IGS(rpl16,rps1)
Camellia oleifera	93668	C	A	C	A	SNP	IGS(rps1,nad4)
Camellia oleifera	93909	TTTAAA	T	TTTAAA	T	INDEL	IGS(rps1,nad4)
Camellia oleifera	97028	G	GGTTTAC	G	GGTTTAC	INDEL	IGS(rps1,nad4)
Camellia oleifera	97146	T	G	T	G	SNP	IGS(rps1,nad4)
Camellia oleifera	97147	C	A	C	A	SNP	IGS(rps1,nad4)
Camellia oleifera	99632	TTTTTA	T	TTTTTA	T	INDEL	IGS(rps1,nad4)
Camellia oleifera	100639	T	C	T	C	SNP	IGS(rps1,nad4)
Camellia oleifera	101209	GATATT	G	GATATT	G	INDEL	IGS(rps1,nad4)
Camellia oleifera	101812	T	TCATCA	T	TCATCA	INDEL	IGS(rps1,nad4)
Camellia oleifera	105520	CCAGAA	C	CCAGAA	C	INDEL	IGS(rps1,nad4)
Camellia oleifera	105998	A	C	A	C	SNP	IGS(rps1,nad4)
Camellia oleifera	106313	G	A	G	A	SNP	IGS(rps1,nad4)
Camellia oleifera	109145	G	GGTTAC	G	GGTTAC	INDEL	IGS(rps1,nad4)
Camellia oleifera	110861	C	A	C	A	SNP	IGS(rps1,nad4)
Camellia oleifera	112560	T	G	T	G	SNP	IGS(rps1,nad4)
Camellia oleifera	112780	CTATTAA	C	CTATTAA	C	INDEL	IGS(rps1,nad4)
Camellia oleifera	113208	CAAAGCCAA	C	CAAAGCCAA	C	INDEL	IGS(rps1,nad4)
Camellia oleifera	115463	C	CCAGCT	C	CCAGCT	INDEL	nad4-intron2
Camellia oleifera	121106	C	A	C	A	SNP	IGS(nad4,trnD-GTC)
Camellia oleifera	121338	TGTTTTA	T	TGTTTTA	T	INDEL	IGS(nad4,trnD-GTC)
Camellia oleifera	121607	T	G	T	G	SNP	IGS(nad4,trnD-GTC)
Camellia oleifera	123302	TTAAGTA	T	TTAAGTA	T	INDEL	IGS(nad4,trnD-GTC)
Camellia oleifera	123865	A	C	A	C	SNP	IGS(nad4,trnD-GTC)
Camellia oleifera	123989	CT	C	CT	C	INDEL	IGS(nad4,trnD-GTC)
Camellia oleifera	124076	G	T	G	T	SNP	IGS(nad4,trnD-GTC)
Camellia oleifera	124684	GGTACC	G	GGTACC	G	INDEL	IGS(trnD-GTC,atp6)
Camellia oleifera	126038	T	A	T	A	SNP	IGS(atp6,mttB)
Camellia oleifera	126049	A	ATATCCGC	A	ATATCCGC	INDEL	IGS(atp6,mttB)
Camellia oleifera	126179	A	C	A	C	SNP	IGS(atp6,mttB)
Camellia oleifera	127479	A	T	A	T	SNP	IGS(atp6,mttB)
Camellia oleifera	129290	C	A	C	A	SNP	IGS(atp6,mttB)
Camellia oleifera	130048	T	G	T	G	SNP	IGS(atp6,mttB)
Camellia oleifera	130249	G	T	G	T	SNP	IGS(atp6,mttB)
Camellia oleifera	130684	A	C	A	C	SNP	IGS(atp6,mttB)
Camellia oleifera	131359	AATAT	A	AATAT	A	INDEL	IGS(atp6,mttB)
Camellia oleifera	131373	TATA	T	TATA	T	INDEL	IGS(atp6,mttB)
Camellia oleifera	132043	A	G	A	G	SNP	IGS(atp6,mttB)
Camellia oleifera	132288	G	GAGTTGA	G	GAGTTGA	INDEL	IGS(atp6,mttB)
Camellia oleifera	132335	C	A	C	A	SNP	IGS(atp6,mttB)
Camellia oleifera	132840	A	AACAGT	A	AACAGT	INDEL	IGS(atp6,mttB)
Camellia oleifera	133292	C	A	C	A	SNP	IGS(atp6,mttB)
Camellia oleifera	133347	CTT	C	CTT	C	INDEL	IGS(atp6,mttB)
Camellia oleifera	133584	GC	G	GC	G	INDEL	IGS(atp6,mttB)
Camellia oleifera	133596	TG	T	TG	T	INDEL	IGS(atp6,mttB)
Camellia oleifera	134651	T	G	T	G	SNP	IGS(mttB,trnK-TTT)
Camellia oleifera	135720	AGTTTG	A	AGTTTG	A	INDEL	IGS(mttB,trnK-TTT)
Camellia oleifera	136151	A	ATTAGTT	A	ATTAGTT	INDEL	IGS(mttB,trnK-TTT)
Camellia oleifera	136456	G	GGGTGTT	G	GGGTGTT	INDEL	IGS(mttB,trnK-TTT)
Camellia oleifera	136800	G	T	G	T	SNP	IGS(mttB,trnK-TTT)
Camellia oleifera	136801	A	C	A	C	SNP	IGS(mttB,trnK-TTT)
Camellia oleifera	137166	A	G	A	G	SNP	IGS(mttB,trnK-TTT)
Camellia oleifera	138576	C	CGTGTTG	C	CGTGTTG	INDEL	IGS(mttB,trnK-TTT)
Camellia oleifera	138973	ATGGAAC	A	ATGGAAC	A	INDEL	IGS(mttB,trnK-TTT)
Camellia oleifera	139450	AG	A	AG	A	INDEL	IGS(mttB,trnK-TTT)
Camellia oleifera	139745	G	T	G	T	SNP	IGS(mttB,trnK-TTT)
Camellia oleifera	140377	T	TTTTTGA	T	TTTTTGA	INDEL	IGS(mttB,trnK-TTT)
Camellia oleifera	140530	TAGTAG	T	TAGTAG	T	INDEL	IGS(mttB,trnK-TTT)
Camellia oleifera	142274	CA	C	CA	C	INDEL	IGS(trnK-TTT,ccmB)
Camellia oleifera	142785	AG	A	AG	A	INDEL	IGS(trnK-TTT,ccmB)
Camellia oleifera	147106	AGTGTT	A	AGTGTT	A	INDEL	IGS(rpl10,trnM-CAT)
Camellia oleifera	147208	T	TTCTCACTAA	T	TTCTCACTAA	INDEL	IGS(rpl10,trnM-CAT)
Camellia oleifera	151171	C	CTTATAA	C	CTTATAA	INDEL	IGS(rpl10,trnM-CAT)
Camellia oleifera	151295	G	A	G	A	SNP	IGS(rpl10,trnM-CAT)
Camellia oleifera	151563	G	GGTGTT	G	GGTGTT	INDEL	IGS(rpl10,trnM-CAT)
Camellia oleifera	151826	C	CGCGGTT	C	CGCGGTT	INDEL	IGS(rpl10,trnM-CAT)
Camellia oleifera	152723	C	CT	C	CT	INDEL	IGS(rpl10,trnM-CAT)
Camellia oleifera	152811	AC	A	AC	A	INDEL	IGS(rpl10,trnM-CAT)
Camellia oleifera	152910	T	TCGATA	T	TCGATA	INDEL	IGS(rpl10,trnM-CAT)
Camellia oleifera	153305	GCAATGA	G	GCAATGA	G	INDEL	IGS(rpl10,trnM-CAT)
Camellia oleifera	153621	G	T	G	T	SNP	IGS(trnM-CAT,rps7)
Camellia oleifera	154070	CTAATA	C	CTAATA	C	INDEL	IGS(trnM-CAT,rps7)
Camellia oleifera	154114	G	C	G	C	SNP	IGS(trnM-CAT,rps7)
Camellia oleifera	154139	C	T	C	T	SNP	IGS(trnM-CAT,rps7)
Camellia oleifera	154145	C	A	C	A	SNP	IGS(trnM-CAT,rps7)
Camellia oleifera	154180	C	T	C	T	SNP	IGS(trnM-CAT,rps7)
Camellia oleifera	154233	G	A	G	A	SNP	IGS(trnM-CAT,rps7)
Camellia oleifera	155525	T	G	T	G	SNP	IGS(rps7,nad2)
Camellia oleifera	155814	TTTAATA	T	TTTAATA	T	INDEL	IGS(rps7,nad2)
Camellia oleifera	156087	T	A	T	A	SNP	IGS(rps7,nad2)
Camellia oleifera	158292	C	CGTAAA	C	CGTAAA	INDEL	IGS(rps7,nad2)
Camellia oleifera	160957	C	CCAACA	C	CCAACA	INDEL	IGS(rps7,nad2)
Camellia oleifera	161308	T	TCTAAC	T	TCTAAC	INDEL	IGS(rps7,nad2)
Camellia oleifera	161510	T	A	T	A	SNP	IGS(rps7,nad2)
Camellia oleifera	162388	TATACA	T	TATACA	T	INDEL	IGS(rps7,nad2)
Camellia oleifera	164425	TCCAGA	T	TCCAGA	T	INDEL	IGS(rps7,nad2)
Camellia oleifera	187755	G	T	G	T	SNP	IGS(rps7,nad2)
Camellia oleifera	190397	C	T	C	T	SNP	IGS(rps7,nad2)
Camellia oleifera	190417	C	T	C	T	SNP	IGS(rps7,nad2)
Camellia oleifera	190510	C	T	C	T	SNP	IGS(rps7,nad2)
Camellia oleifera	190529	G	T	G	T	SNP	IGS(rps7,nad2)
Camellia oleifera	191062	G	A	G	A	SNP	IGS(rps7,nad2)
Camellia oleifera	191132	C	T	C	T	SNP	IGS(rps7,nad2)
Camellia oleifera	191369	G	A	G	A	SNP	IGS(rps7,nad2)
Camellia oleifera	191478	C	T	C	T	SNP	IGS(rps7,nad2)
Camellia oleifera	191485	G	A	G	A	SNP	IGS(rps7,nad2)
Camellia oleifera	191574	G	A	G	A	SNP	IGS(rps7,nad2)
Camellia oleifera	191589	G	A	G	A	SNP	IGS(rps7,nad2)
Camellia oleifera	191636	GGTAATT	G	GGTAATT	G	INDEL	IGS(rps7,nad2)
Camellia oleifera	191679	C	T	C	T	SNP	IGS(rps7,nad2)
Camellia oleifera	191793	T	TCAACCA	T	TCAACCA	INDEL	IGS(rps7,nad2)
Camellia oleifera	192779	C	A	C	A	SNP	IGS(rps7,nad2)
Camellia oleifera	192975	A	C	A	C	SNP	IGS(rps7,nad2)
Camellia oleifera	193661	G	A	G	A	SNP	IGS(rps7,nad2)
Camellia oleifera	195335	G	GCCAACA	G	GCCAACA	INDEL	IGS(rps7,nad2)
Camellia oleifera	199811	C	CTTAACA	C	CTTAACA	INDEL	IGS(rps7,nad2)
Camellia oleifera	201156	CG	C	CG	C	INDEL	nad2-intron1
Camellia oleifera	201501	TATTCG	T	TATTCG	T	INDEL	nad2-intron1
Camellia oleifera	201878	AGTTCC	A	AGTTCC	A	INDEL	nad2-intron1
Camellia oleifera	203877	C	CATCAGG	C	CATCAGG	INDEL	IGS(nad2,rps12)
Camellia oleifera	205568	A	T	A	T	SNP	IGS(nad2,rps12)
Camellia oleifera	205569	T	A	T	A	SNP	IGS(nad2,rps12)
Camellia oleifera	206121	A	C	A	C	SNP	IGS(nad2,rps12)
Camellia oleifera	207762	CTT	C	CTT	C	INDEL	IGS(nad2,rps12)
Camellia oleifera	208365	C	CGCTAAT	C	CGCTAAT	INDEL	IGS(nad2,rps12)
Camellia oleifera	210003	AGATAC	A	AGATAC	A	INDEL	IGS(nad2,rps12)
Camellia oleifera	211412	T	G	T	G	SNP	IGS(nad2,rps12)
Camellia oleifera	211913	TCAGAAGG	T	TCAGAAGG	T	INDEL	IGS(nad2,rps12)
Camellia oleifera	212385	T	G	T	G	SNP	IGS(nad2,rps12)
Camellia oleifera	212963	T	TCAAACC	T	TCAAACC	INDEL	IGS(nad2,rps12)
Camellia oleifera	213697	A	C	A	C	SNP	IGS(nad2,rps12)
Camellia oleifera	215441	C	A	C	A	SNP	IGS(nad2,rps12)
Camellia oleifera	215525	G	GTGTAT	G	GTGTAT	INDEL	IGS(nad2,rps12)
Camellia oleifera	216308	CCTATCA	C		C	INDEL	IGS(rps12,trnT-GGT)
Camellia oleifera	216319	T	C		C	SNP	IGS(rps12,trnT-GGT)
Camellia oleifera	216322	T	C		C	SNP	IGS(rps12,trnT-GGT)
Camellia oleifera	216590	T	C		C	SNP	IGS(rps12,trnT-GGT)
Camellia oleifera	216617	G	GA		GA	INDEL	IGS(rps12,trnT-GGT)
Camellia oleifera	216641	T	G		G	SNP	IGS(rps12,trnT-GGT)
Camellia oleifera	216863	CCCGTTT	C		C	INDEL	IGS(rps12,trnT-GGT)
Camellia oleifera	216937	C	T		T	SNP	IGS(rps12,trnT-GGT)
Camellia oleifera	216939	C	G		G	SNP	IGS(rps12,trnT-GGT)
Camellia oleifera	217656	T	A	T	A	SNP	IGS(rps12,trnT-GGT)
Camellia oleifera	219760	C	CGCAAG	C	CGCAAG	INDEL	IGS(rps12,trnT-GGT)
Camellia oleifera	220091	T	G	T	G	SNP	IGS(rps12,trnT-GGT)
Camellia oleifera	220097	C	A	C	A	SNP	IGS(rps12,trnT-GGT)
Camellia oleifera	220117	C	CAATAAA	C	CAATAAA	INDEL	IGS(rps12,trnT-GGT)
Camellia oleifera	222615	G	T	G	T	SNP	IGS(rps12,trnT-GGT)
Camellia oleifera	223299	T	TGGTTC	T	TGGTTC	INDEL	IGS(rps12,trnT-GGT)
Camellia oleifera	224124	C	CTTTTAG	C	CTTTTAG	INDEL	IGS(rps12,trnT-GGT)
Camellia oleifera	224815	A	G		G	SNP	IGS(rps12,trnT-GGT)
Camellia oleifera	225165	A	T		T	SNP	IGS(rps12,trnT-GGT)
Camellia oleifera	225236	C	CAA		CAA	INDEL	IGS(rps12,trnT-GGT)
Camellia oleifera	225459	T	C		C	SNP	IGS(rps12,trnT-GGT)
Camellia oleifera	225468	T	C		C	SNP	IGS(rps12,trnT-GGT)
Camellia oleifera	225593	G	T		T	SNP	IGS(rps12,trnT-GGT)
Camellia oleifera	225597	A	G		G	SNP	IGS(rps12,trnT-GGT)
Camellia oleifera	225604	G	T		T	SNP	IGS(rps12,trnT-GGT)
Camellia oleifera	225619	A	G		G	SNP	IGS(rps12,trnT-GGT)
Camellia oleifera	225634	T	C		C	SNP	IGS(rps12,trnT-GGT)
Camellia oleifera	225635	T	C		C	SNP	IGS(rps12,trnT-GGT)
Camellia oleifera	225647	T	C		C	SNP	IGS(rps12,trnT-GGT)
Camellia oleifera	225756	T	C		C	SNP	IGS(rps12,trnT-GGT)
Camellia oleifera	225782	A	T		T	SNP	IGS(rps12,trnT-GGT)
Camellia oleifera	225832	T	C		C	SNP	IGS(rps12,trnT-GGT)
Camellia oleifera	225908	T	C		C	SNP	IGS(rps12,trnT-GGT)
Camellia oleifera	225909	T	C		C	SNP	IGS(rps12,trnT-GGT)
Camellia oleifera	225955	A	G		G	SNP	IGS(rps12,trnT-GGT)
Camellia oleifera	226017	T	C		C	SNP	IGS(rps12,trnT-GGT)
Camellia oleifera	226023	T	C		C	SNP	IGS(rps12,trnT-GGT)
Camellia oleifera	226030	A	G		G	SNP	IGS(rps12,trnT-GGT)
Camellia oleifera	226033	T	A		A	SNP	IGS(rps12,trnT-GGT)
Camellia oleifera	226042	T	C		C	SNP	IGS(rps12,trnT-GGT)
Camellia oleifera	226049	T	C		C	SNP	IGS(rps12,trnT-GGT)
Camellia oleifera	226069	T	C		C	SNP	IGS(rps12,trnT-GGT)
Camellia oleifera	226095	GAGA	G		G	INDEL	IGS(rps12,trnT-GGT)
Camellia oleifera	226136	A	G		G	SNP	IGS(rps12,trnT-GGT)
Camellia oleifera	226278	A	C		C	SNP	IGS(rps12,trnT-GGT)
Camellia oleifera	226574	G	T	G	T	SNP	IGS(trnT-GGT,trnM-CAT-2)
Camellia oleifera	226578	C	T	C	T	SNP	IGS(trnT-GGT,trnM-CAT-2)
Camellia oleifera	226580	C	T	C	T	SNP	IGS(trnT-GGT,trnM-CAT-2)
Camellia oleifera	226582	C	G	C	G	SNP	IGS(trnT-GGT,trnM-CAT-2)
Camellia oleifera	226643	T	G	T	G	SNP	IGS(trnT-GGT,trnM-CAT-2)
Camellia oleifera	226645	T	G	T	G	SNP	IGS(trnT-GGT,trnM-CAT-2)
Camellia oleifera	227307	CAACTAGT	C	CAACTAGT	C	INDEL	IGS(trnT-GGT,trnM-CAT-2)
Camellia oleifera	228505	CTGAAG	C	CTGAAG	C	INDEL	IGS(trnM-CAT-2,nad1)
Camellia oleifera	228814	C	A	C	A	SNP	IGS(trnM-CAT-2,nad1)
Camellia oleifera	228958	A	C	A	C	SNP	IGS(trnM-CAT-2,nad1)
Camellia oleifera	228959	G	T	G	T	SNP	IGS(trnM-CAT-2,nad1)
Camellia oleifera	229029	A	C	A	C	SNP	IGS(trnM-CAT-2,nad1)
Camellia oleifera	229961	A	AAAAG	A	AAAAG	INDEL	IGS(trnM-CAT-2,nad1)
Camellia oleifera	230072	T	TTTTGTGA	T	TTTTGTGA	INDEL	IGS(trnM-CAT-2,nad1)
Camellia oleifera	230157	A	AGGCAGTTTC	A	AGGCAGTTTC	INDEL	IGS(trnM-CAT-2,nad1)
Camellia oleifera	230185	T	G	T	G	SNP	IGS(trnM-CAT-2,nad1)
Camellia oleifera	236048	A	T	A	T	SNP	IGS(nad1,trnC-GCA)
Camellia oleifera	236049	G	T	G	T	SNP	IGS(nad1,trnC-GCA)
Camellia oleifera	236050	A	C	A	C	SNP	IGS(nad1,trnC-GCA)
Camellia oleifera	237626	C	CGTGCT	C	CGTGCT	INDEL	IGS(nad1,trnC-GCA)
Camellia oleifera	239774	G	GAGTAC	G	GAGTAC	INDEL	IGS(nad1,trnC-GCA)
Camellia oleifera	239918	T	G	T	G	SNP	IGS(nad1,trnC-GCA)
Camellia oleifera	239924	TGTAAA	T	TGTAAA	T	INDEL	IGS(nad1,trnC-GCA)
Camellia oleifera	240963	A	C	A	C	SNP	IGS(nad1,trnC-GCA)
Camellia oleifera	242204	G	GGTTACA	G	GGTTACA	INDEL	IGS(nad1,trnC-GCA)
Camellia oleifera	244086	T	TGTTAAG	T	TGTTAAG	INDEL	IGS(nad1,trnC-GCA)
Camellia oleifera	244463	G	GCAGAA	G	GCAGAA	INDEL	IGS(nad1,trnC-GCA)
Camellia oleifera	244534	CGGGTGA	C	CGGGTGA	C	INDEL	IGS(nad1,trnC-GCA)
Camellia oleifera	247503	T	G	T	G	SNP	IGS(nad1,trnC-GCA)
Camellia oleifera	249797	TCTATAA	T	TCTATAA	T	INDEL	IGS(nad1,trnC-GCA)
Camellia oleifera	250553	TTCTTA	T	TTCTTA	T	INDEL	IGS(nad1,trnC-GCA)
Camellia oleifera	250868	T	A	T	A	SNP	IGS(nad1,trnC-GCA)
Camellia oleifera	252150	T	A	T	A	SNP	IGS(nad1,trnC-GCA)
Camellia oleifera	252720	C	A	C	A	SNP	IGS(nad1,trnC-GCA)
Camellia oleifera	253936	A	ACAAAAC	A	ACAAAAC	INDEL	IGS(nad1,trnC-GCA)
Camellia oleifera	254145	T	G	T	G	SNP	IGS(nad1,trnC-GCA)
Camellia oleifera	254319	TTTATA	T	TTTATA	T	INDEL	IGS(nad1,trnC-GCA)
Camellia oleifera	255176	A	C	A	C	SNP	IGS(nad1,trnC-GCA)
Camellia oleifera	255379	CCAAAA	C	CCAAAA	C	INDEL	IGS(nad1,trnC-GCA)
Camellia oleifera	256116	T	G	T	G	SNP	IGS(trnC-GCA,trnN-GTT)
Camellia oleifera	256562	TG	T	TG	T	INDEL	IGS(trnC-GCA,trnN-GTT)
Camellia oleifera	256829	G	GGGAGA	G	GGGAGA	INDEL	IGS(trnC-GCA,trnN-GTT)
Camellia oleifera	257376	TTAA	T	TTAA	T	INDEL	IGS(trnC-GCA,trnN-GTT)
Camellia oleifera	257429	G	T	G	T	SNP	IGS(trnC-GCA,trnN-GTT)
Camellia oleifera	257766	CAATAT	C	CAATAT	C	INDEL	IGS(trnC-GCA,trnN-GTT)
Camellia oleifera	258170	C	A	C	A	SNP	IGS(trnN-GTT,trnY-GTA)
Camellia oleifera	260543	C	CCGAAA	C	CCGAAA	INDEL	nad2-intron2
Camellia oleifera	261681	G	GTGGTAT	G	GTGGTAT	INDEL	nad2-intron2
Camellia oleifera	262784	CAGTTT	C	CAGTTT	C	INDEL	nad2-intron3
Camellia oleifera	263112	C	A	C	A	SNP	nad2-intron3
Camellia oleifera	263830	CTTTACA	C	CTTTACA	C	INDEL	nad2-intron3
Camellia oleifera	264597	T	TTTTTCA	T	TTTTTCA	INDEL	IGS(nad2,trnS-GCT)
Camellia oleifera	264677	CAATCAA	C	CAATCAA	C	INDEL	IGS(nad2,trnS-GCT)
Camellia oleifera	265655	CGTTAT	C	CGTTAT	C	INDEL	IGS(nad2,trnS-GCT)
Camellia oleifera	265926	G	GCAGTGC	G	GCAGTGC	INDEL	IGS(nad2,trnS-GCT)
Camellia oleifera	267044	T	C	T	C	SNP	IGS(nad2,trnS-GCT)
Camellia oleifera	269254	A	G	A	G	SNP	IGS(nad2,trnS-GCT)
Camellia oleifera	272546	GGTACCC	G	GGTACCC	G	INDEL	IGS(nad2,trnS-GCT)
Camellia oleifera	274176	CAACCAAA	C	CAACCAAA	C	INDEL	IGS(nad2,trnS-GCT)
Camellia oleifera	275154	CCAATAA	C	CCAATAA	C	INDEL	IGS(trnP-TGG,sdh3)
Camellia oleifera	275426	T	TTTTAA	T	TTTTAA	INDEL	IGS(trnP-TGG,sdh3)
Camellia oleifera	275527	GAGTCA	G	GAGTCA	G	INDEL	IGS(trnP-TGG,sdh3)
Camellia oleifera	276265	G	GTTACGC	G	GTTACGC	INDEL	IGS(trnP-TGG,sdh3)
Camellia oleifera	276449	AGTCTT	A	AGTCTT	A	INDEL	IGS(trnP-TGG,sdh3)
Camellia oleifera	276828	A	C	A	C	SNP	IGS(trnP-TGG,sdh3)
Camellia oleifera	276836	CGTGCT	C	CGTGCT	C	INDEL	IGS(trnP-TGG,sdh3)
Camellia oleifera	277260	T	TTATAC	T	TTATAC	INDEL	IGS(trnP-TGG,sdh3)
Camellia oleifera	280961	G	T	G	T	SNP	IGS(trnP-TGG,sdh3)
Camellia oleifera	283573	A	AGTTGC	A	AGTTGC	INDEL	IGS(trnP-TGG,sdh3)
Camellia oleifera	285925	GCTGCA	G	GCTGCA	G	INDEL	IGS(trnP-TGG,sdh3)
Camellia oleifera	292518	CTAAAT	C	CTAAAT	C	INDEL	IGS(trnP-TGG,sdh3)
Camellia oleifera	293495	G	A	G	A	SNP	IGS(trnP-TGG,sdh3)
Camellia oleifera	294274	T	C	T	C	SNP	IGS(sdh3,cox2)
Camellia oleifera	294282	T	A	T	A	SNP	IGS(sdh3,cox2)
Camellia oleifera	300145	G	T	G	T	SNP	IGS(sdh3,cox2)
Camellia oleifera	303035	G	GCTGCAC	G	GCTGCAC	INDEL	IGS(sdh3,cox2)
Camellia oleifera	304505	CTTTAT	C	CTTTAT	C	INDEL	IGS(sdh3,cox2)
Camellia oleifera	305181	C	A		A	SNP	IGS(sdh3,cox2)
Camellia oleifera	305276	A	T		T	SNP	IGS(sdh3,cox2)
Camellia oleifera	305570	T	G		G	SNP	IGS(sdh3,cox2)
Camellia oleifera	305952	T	C		C	SNP	IGS(sdh3,cox2)
Camellia oleifera	306318	G	A		A	SNP	IGS(sdh3,cox2)
Camellia oleifera	306678	T	A		A	SNP	IGS(sdh3,cox2)
Camellia oleifera	306749	T	C		C	SNP	IGS(sdh3,cox2)
Camellia oleifera	306752	A	T		T	SNP	IGS(sdh3,cox2)
Camellia oleifera	306755	G	A		A	SNP	IGS(sdh3,cox2)
Camellia oleifera	306762	C	CAA		CAA	INDEL	IGS(sdh3,cox2)
Camellia oleifera	306965	C	CTTTAT		CTTTAT	INDEL	IGS(sdh3,cox2)
Camellia oleifera	307241	G	A		A	SNP	IGS(sdh3,cox2)
Camellia oleifera	307305	C	T		T	SNP	IGS(sdh3,cox2)
Camellia oleifera	307727	T	C		C	SNP	IGS(sdh3,cox2)
Camellia oleifera	307853	GAAGGCAAC	G		G	INDEL	IGS(sdh3,cox2)
Camellia oleifera	307865	T	C		C	SNP	IGS(sdh3,cox2)
Camellia oleifera	307897	C	A		A	SNP	IGS(sdh3,cox2)
Camellia oleifera	308055	A	G		G	SNP	IGS(sdh3,cox2)
Camellia oleifera	308056	A	C		C	SNP	IGS(sdh3,cox2)
Camellia oleifera	308067	AAAAAGTTCAG	A		A	INDEL	IGS(sdh3,cox2)
Camellia oleifera	308129	T	G		G	SNP	IGS(sdh3,cox2)
Camellia oleifera	308196	CTAATAA	C		C	INDEL	IGS(sdh3,cox2)
Camellia oleifera	308267	TTTAGTAATAA	T		T	INDEL	IGS(sdh3,cox2)
Camellia oleifera	308579	C	A		A	SNP	IGS(sdh3,cox2)
Camellia oleifera	308775	G	A		A	SNP	IGS(sdh3,cox2)
Camellia oleifera	308970	C	T		T	SNP	IGS(sdh3,cox2)
Camellia oleifera	309139	G	C		C	SNP	IGS(sdh3,cox2)
Camellia oleifera	309151	A	C		C	SNP	IGS(sdh3,cox2)
Camellia oleifera	309227	A	C		C	SNP	IGS(sdh3,cox2)
Camellia oleifera	309236	A	C		C	SNP	IGS(sdh3,cox2)
Camellia oleifera	309403	G	A		A	SNP	IGS(sdh3,cox2)
Camellia oleifera	309413	T	A		A	SNP	IGS(sdh3,cox2)
Camellia oleifera	309414	T	A		A	SNP	IGS(sdh3,cox2)
Camellia oleifera	309415	T	A		A	SNP	IGS(sdh3,cox2)
Camellia oleifera	309470	G	A		A	SNP	IGS(sdh3,cox2)
Camellia oleifera	309529	G	A		A	SNP	IGS(sdh3,cox2)
Camellia oleifera	309864	A	G		G	SNP	IGS(sdh3,cox2)
Camellia oleifera	309866	A	ATC		ATC	INDEL	IGS(sdh3,cox2)
Camellia oleifera	310012	A	C		C	SNP	IGS(sdh3,cox2)
Camellia oleifera	310014	C	CT		CT	INDEL	IGS(sdh3,cox2)
Camellia oleifera	310068	A	T		T	SNP	IGS(sdh3,cox2)
Camellia oleifera	310156	C	A		A	SNP	IGS(sdh3,cox2)
Camellia oleifera	310206	T	G		G	SNP	IGS(sdh3,cox2)
Camellia oleifera	310251	G	T		T	SNP	IGS(sdh3,cox2)
Camellia oleifera	310252	G	T		T	SNP	IGS(sdh3,cox2)
Camellia oleifera	310260	T	A		A	SNP	IGS(sdh3,cox2)
Camellia oleifera	310266	T	G		G	SNP	IGS(sdh3,cox2)
Camellia oleifera	310313	G	A		A	SNP	IGS(sdh3,cox2)
Camellia oleifera	310315	G	C		C	SNP	IGS(sdh3,cox2)
Camellia oleifera	310396	C	T		T	SNP	IGS(sdh3,cox2)
Camellia oleifera	310398	G	A		A	SNP	IGS(sdh3,cox2)
Camellia oleifera	310404	A	G		G	SNP	IGS(sdh3,cox2)
Camellia oleifera	310448	C	CT		CT	INDEL	IGS(sdh3,cox2)
Camellia oleifera	310450	G	C		C	SNP	IGS(sdh3,cox2)
Camellia oleifera	310455	G	T		T	SNP	IGS(sdh3,cox2)
Camellia oleifera	310541	G	GGAA		GGAA	INDEL	IGS(sdh3,cox2)
Camellia oleifera	310543	C	A		A	SNP	IGS(sdh3,cox2)
Camellia oleifera	310547	G	A		A	SNP	IGS(sdh3,cox2)
Camellia oleifera	310575	C	A		A	SNP	IGS(sdh3,cox2)
Camellia oleifera	310666	T	TAATA		TAATA	INDEL	IGS(sdh3,cox2)
Camellia oleifera	310761	CG	C		C	INDEL	IGS(sdh3,cox2)
Camellia oleifera	310837	C	A		A	SNP	IGS(sdh3,cox2)
Camellia oleifera	310838	T	A		A	SNP	IGS(sdh3,cox2)
Camellia oleifera	311584	AG	A		A	INDEL	IGS(sdh3,cox2)
Camellia oleifera	311589	TC	T		T	INDEL	IGS(sdh3,cox2)
Camellia oleifera	312279	A	C		C	SNP	IGS(sdh3,cox2)
Camellia oleifera	312280	A	T		T	SNP	IGS(sdh3,cox2)
Camellia oleifera	312281	A	T		T	SNP	IGS(sdh3,cox2)
Camellia oleifera	313331	G	GGTAAC		GGTAAC	INDEL	IGS(sdh3,cox2)
Camellia oleifera	313384	T	C		C	SNP	IGS(sdh3,cox2)
Camellia oleifera	313551	T	TC		TC	INDEL	IGS(sdh3,cox2)
Camellia oleifera	313826	C	T		T	SNP	IGS(sdh3,cox2)
Camellia oleifera	314232	T	TG	T	TG	INDEL	IGS(sdh3,cox2)
Camellia oleifera	314327	T	C	T	C	SNP	IGS(sdh3,cox2)
Camellia oleifera	315069	C	CAGAAGATG	C	CAGAAGATG	INDEL	IGS(sdh3,cox2)
Camellia oleifera	315291	T	G	T	G	SNP	IGS(sdh3,cox2)
Camellia oleifera	316797	T	C	T	C	SNP	IGS(sdh3,cox2)
Camellia oleifera	317051	CTTCTCATT	C	CTTCTCATT	C	INDEL	IGS(sdh3,cox2)
Camellia oleifera	317828	CATAAT	C	CATAAT	C	INDEL	IGS(sdh3,cox2)
Camellia oleifera	318125	T	TGCGACCGGC	T	TGCGACCGGC	INDEL	IGS(sdh3,cox2)
Camellia oleifera	319189	TGTTCAC	T	TGTTCAC	T	INDEL	IGS(sdh3,cox2)
Camellia oleifera	319627	G	T	G	T	SNP	IGS(sdh3,cox2)
Camellia oleifera	319836	GTGTTT	G	GTGTTT	G	INDEL	IGS(sdh3,cox2)
Camellia oleifera	322259	T	C		C	SNP	IGS(sdh3,cox2)
Camellia oleifera	322260	C	G		G	SNP	IGS(sdh3,cox2)
Camellia oleifera	322261	G	T		T	SNP	IGS(sdh3,cox2)
Camellia oleifera	322271	TCAAC	T		T	INDEL	IGS(sdh3,cox2)
Camellia oleifera	323094	A	G		G	SNP	IGS(sdh3,cox2)
Camellia oleifera	323198	A	C		C	SNP	IGS(sdh3,cox2)
Camellia oleifera	323202	T	C		C	SNP	IGS(sdh3,cox2)
Camellia oleifera	323371	T	G		G	SNP	IGS(sdh3,cox2)
Camellia oleifera	323400	A	G		G	SNP	IGS(sdh3,cox2)
Camellia oleifera	323440	T	C		C	SNP	IGS(sdh3,cox2)
Camellia oleifera	323575	T	C		C	SNP	IGS(sdh3,cox2)
Camellia oleifera	323594	T	C		C	SNP	IGS(sdh3,cox2)
Camellia oleifera	323634	T	C		C	SNP	IGS(sdh3,cox2)
Camellia oleifera	323635	C	T		T	SNP	IGS(sdh3,cox2)
Camellia oleifera	323701	T	C		C	SNP	IGS(sdh3,cox2)
Camellia oleifera	323758	A	G		G	SNP	IGS(sdh3,cox2)
Camellia oleifera	323872	A	G		G	SNP	IGS(sdh3,cox2)
Camellia oleifera	324084	C	CT		CT	INDEL	IGS(sdh3,cox2)
Camellia oleifera	324144	T	C		C	SNP	IGS(sdh3,cox2)
Camellia oleifera	324157	T	C		C	SNP	IGS(sdh3,cox2)
Camellia oleifera	324174	A	G		G	SNP	IGS(sdh3,cox2)
Camellia oleifera	324315	G	A		A	SNP	IGS(sdh3,cox2)
Camellia oleifera	324339	T	C		C	SNP	IGS(sdh3,cox2)
Camellia oleifera	324349	T	C		C	SNP	IGS(sdh3,cox2)
Camellia oleifera	324376	T	C		C	SNP	IGS(sdh3,cox2)
Camellia oleifera	324424	T	C		C	SNP	IGS(sdh3,cox2)
Camellia oleifera	324554	T	C		C	SNP	IGS(sdh3,cox2)
Camellia oleifera	324561	G	A		A	SNP	IGS(sdh3,cox2)
Camellia oleifera	324601	G	C		C	SNP	IGS(sdh3,cox2)
Camellia oleifera	324637	T	TCTC		TCTC	INDEL	IGS(sdh3,cox2)
Camellia oleifera	325639	C	CTTTAAA	C	CTTTAAA	INDEL	IGS(sdh3,cox2)
Camellia oleifera	326002	AAAT	A	AAAT	A	INDEL	IGS(sdh3,cox2)
Camellia oleifera	326951	C	CTTTTG	C	CTTTTG	INDEL	IGS(sdh3,cox2)
Camellia oleifera	327773	T	TTTTTCA	T	TTTTTCA	INDEL	IGS(sdh3,cox2)
Camellia oleifera	328884	C	CT	C	CT	INDEL	IGS(sdh3,cox2)
Camellia oleifera	330188	C	A	C	A	SNP	IGS(sdh3,cox2)
Camellia oleifera	330346	TTTCCCG	T	TTTCCCG	T	INDEL	IGS(sdh3,cox2)
Camellia oleifera	330585	C	A	C	A	SNP	IGS(sdh3,cox2)
Camellia oleifera	331058	C	A	C	A	SNP	IGS(sdh3,cox2)
Camellia oleifera	333379	G	T	G	T	SNP	IGS(sdh3,cox2)
Camellia oleifera	334401	T	G	T	G	SNP	IGS(sdh3,cox2)
Camellia oleifera	335514	T	TATTAA	T	TATTAA	INDEL	IGS(sdh3,cox2)
Camellia oleifera	346578	C	A		A	SNP	IGS(cox2,trnS-TGA)
Camellia oleifera	346582	C	G		G	SNP	IGS(cox2,trnS-TGA)
Camellia oleifera	346583	T	G		G	SNP	IGS(cox2,trnS-TGA)
Camellia oleifera	368145	TCGATA	T	TCGATA	T	INDEL	IGS(cox2,trnS-TGA)
Camellia oleifera	368297	C	CAAAT	C	CAAAT	INDEL	IGS(cox2,trnS-TGA)
Camellia oleifera	368975	GGTTTCA	G	GGTTTCA	G	INDEL	IGS(cox2,trnS-TGA)
Camellia oleifera	369949	C	CT	C	CT	INDEL	IGS(cox2,trnS-TGA)
Camellia oleifera	370644	A	G		G	SNP	IGS(cox2,trnS-TGA)
Camellia oleifera	370762	T	A		A	SNP	IGS(cox2,trnS-TGA)
Camellia oleifera	370792	A	G		G	SNP	IGS(cox2,trnS-TGA)
Camellia oleifera	370913	GGTTCAT	G		G	INDEL	IGS(cox2,trnS-TGA)
Camellia oleifera	370938	T	G		G	SNP	IGS(cox2,trnS-TGA)
Camellia oleifera	371234	T	C		C	SNP	IGS(cox2,trnS-TGA)
Camellia oleifera	371422	G	C		C	SNP	IGS(cox2,trnS-TGA)
Camellia oleifera	371437	C	T		T	SNP	IGS(cox2,trnS-TGA)
Camellia oleifera	371813	T	C		C	SNP	IGS(cox2,trnS-TGA)
Camellia oleifera	371914	A	G		G	SNP	IGS(cox2,trnS-TGA)
Camellia oleifera	371947	T	G		G	SNP	IGS(cox2,trnS-TGA)
Camellia oleifera	371951	T	G		G	SNP	IGS(cox2,trnS-TGA)
Camellia oleifera	371964	A	C		C	SNP	IGS(cox2,trnS-TGA)
Camellia oleifera	371971	T	G		G	SNP	IGS(cox2,trnS-TGA)
Camellia oleifera	371972	G	A		A	SNP	IGS(cox2,trnS-TGA)
Camellia oleifera	371981	C	T		T	SNP	IGS(cox2,trnS-TGA)
Camellia oleifera	371982	A	C		C	SNP	IGS(cox2,trnS-TGA)
Camellia oleifera	372027	A	C		C	SNP	IGS(cox2,trnS-TGA)
Camellia oleifera	372029	T	C		C	SNP	IGS(cox2,trnS-TGA)
Camellia oleifera	372090	A	G		G	SNP	IGS(cox2,trnS-TGA)
Camellia oleifera	372240	T	A		A	SNP	IGS(cox2,trnS-TGA)
Camellia oleifera	372318	T	C		C	SNP	IGS(cox2,trnS-TGA)
Camellia oleifera	372327	G	A		A	SNP	IGS(cox2,trnS-TGA)
Camellia oleifera	372496	AC	A		A	INDEL	IGS(cox2,trnS-TGA)
Camellia oleifera	373844	A	G		G	SNP	IGS(cox2,trnS-TGA)
Camellia oleifera	373927	T	G		G	SNP	IGS(cox2,trnS-TGA)
Camellia oleifera	373941	T	C		C	SNP	IGS(cox2,trnS-TGA)
Camellia oleifera	373963	T	C		C	SNP	IGS(cox2,trnS-TGA)
Camellia oleifera	373990	T	C		C	SNP	IGS(cox2,trnS-TGA)
Camellia oleifera	374015	A	G		G	SNP	IGS(cox2,trnS-TGA)
Camellia oleifera	374040	C	A		A	SNP	IGS(cox2,trnS-TGA)
Camellia oleifera	374057	A	G		G	SNP	IGS(cox2,trnS-TGA)
Camellia oleifera	374062	T	C		C	SNP	IGS(cox2,trnS-TGA)
Camellia oleifera	374090	T	G		G	SNP	IGS(cox2,trnS-TGA)
Camellia oleifera	374103	T	C		C	SNP	IGS(cox2,trnS-TGA)
Camellia oleifera	374138	T	C		C	SNP	IGS(cox2,trnS-TGA)
Camellia oleifera	374149	T	C		C	SNP	IGS(cox2,trnS-TGA)
Camellia oleifera	374163	T	C		C	SNP	IGS(cox2,trnS-TGA)
Camellia oleifera	374164	T	C		C	SNP	IGS(cox2,trnS-TGA)
Camellia oleifera	374171	A	G		G	SNP	IGS(cox2,trnS-TGA)
Camellia oleifera	374186	T	C		C	SNP	IGS(cox2,trnS-TGA)
Camellia oleifera	374199	A	G		G	SNP	IGS(cox2,trnS-TGA)
Camellia oleifera	374206	T	C		C	SNP	IGS(cox2,trnS-TGA)
Camellia oleifera	374214	T	C		C	SNP	IGS(cox2,trnS-TGA)
Camellia oleifera	374231	T	C		C	SNP	IGS(cox2,trnS-TGA)
Camellia oleifera	374238	T	C		C	SNP	IGS(cox2,trnS-TGA)
Camellia oleifera	374239	A	G		G	SNP	IGS(cox2,trnS-TGA)
Camellia oleifera	374325	T	C		C	SNP	IGS(cox2,trnS-TGA)
Camellia oleifera	374335	A	G		G	SNP	IGS(cox2,trnS-TGA)
Camellia oleifera	374430	CT	C		C	INDEL	IGS(cox2,trnS-TGA)
Camellia oleifera	374480	GTAGTA	G		G	INDEL	IGS(cox2,trnS-TGA)
Camellia oleifera	374499	T	C		C	SNP	IGS(cox2,trnS-TGA)
Camellia oleifera	374511	A	G		G	SNP	IGS(cox2,trnS-TGA)
Camellia oleifera	374512	A	G		G	SNP	IGS(cox2,trnS-TGA)
Camellia oleifera	374539	A	G		G	SNP	IGS(cox2,trnS-TGA)
Camellia oleifera	374550	A	G		G	SNP	IGS(cox2,trnS-TGA)
Camellia oleifera	374612	C	T		T	SNP	IGS(cox2,trnS-TGA)
Camellia oleifera	374628	A	G		G	SNP	IGS(cox2,trnS-TGA)
Camellia oleifera	374636	A	G		G	SNP	IGS(cox2,trnS-TGA)
Camellia oleifera	374691	T	C		C	SNP	IGS(cox2,trnS-TGA)
Camellia oleifera	374702	C	G		G	SNP	IGS(cox2,trnS-TGA)
Camellia oleifera	374736	T	C		C	SNP	IGS(cox2,trnS-TGA)
Camellia oleifera	374759	A	G		G	SNP	IGS(cox2,trnS-TGA)
Camellia oleifera	374768	A	G		G	SNP	IGS(cox2,trnS-TGA)
Camellia oleifera	374795	T	C		C	SNP	IGS(cox2,trnS-TGA)
Camellia oleifera	374837	A	G		G	SNP	IGS(cox2,trnS-TGA)
Camellia oleifera	374875	A	T		T	SNP	IGS(cox2,trnS-TGA)
Camellia oleifera	375147	A	G		G	SNP	IGS(cox2,trnS-TGA)
Camellia oleifera	375172	T	C		C	SNP	IGS(cox2,trnS-TGA)
Camellia oleifera	375175	A	G		G	SNP	IGS(cox2,trnS-TGA)
Camellia oleifera	375248	T	C		C	SNP	IGS(cox2,trnS-TGA)
Camellia oleifera	375256	A	G		G	SNP	IGS(cox2,trnS-TGA)
Camellia oleifera	375326	T	C		C	SNP	IGS(cox2,trnS-TGA)
Camellia oleifera	375768	A	G		G	SNP	IGS(cox2,trnS-TGA)
Camellia oleifera	375794	A	G		G	SNP	IGS(cox2,trnS-TGA)
Camellia oleifera	375985	A	G		G	SNP	IGS(cox2,trnS-TGA)
Camellia oleifera	376190	G	T		T	SNP	IGS(cox2,trnS-TGA)
Camellia oleifera	376319	T	C		C	SNP	IGS(cox2,trnS-TGA)
Camellia oleifera	376913	A	C		C	SNP	IGS(cox2,trnS-TGA)
Camellia oleifera	376979	T	C		C	SNP	IGS(cox2,trnS-TGA)
Camellia oleifera	376990	A	G		G	SNP	IGS(cox2,trnS-TGA)
Camellia oleifera	377062	A	G		G	SNP	IGS(cox2,trnS-TGA)
Camellia oleifera	377230	AG	A		A	INDEL	IGS(cox2,trnS-TGA)
Camellia oleifera	377405	A	G		G	SNP	IGS(cox2,trnS-TGA)
Camellia oleifera	377409	T	C		C	SNP	IGS(cox2,trnS-TGA)
Camellia oleifera	377424	A	G		G	SNP	IGS(cox2,trnS-TGA)
Camellia oleifera	377478	T	TG		TG	INDEL	IGS(cox2,trnS-TGA)
Camellia oleifera	377499	T	C		C	SNP	IGS(cox2,trnS-TGA)
Camellia oleifera	377505	T	C		C	SNP	IGS(cox2,trnS-TGA)
Camellia oleifera	377585	A	G		G	SNP	IGS(cox2,trnS-TGA)
Camellia oleifera	377597	A	G		G	SNP	IGS(cox2,trnS-TGA)
Camellia oleifera	377614	A	G		G	SNP	IGS(cox2,trnS-TGA)
Camellia oleifera	377651	T	C		C	SNP	IGS(cox2,trnS-TGA)
Camellia oleifera	377666	A	G		G	SNP	IGS(cox2,trnS-TGA)
Camellia oleifera	377683	A	G		G	SNP	IGS(cox2,trnS-TGA)
Camellia oleifera	377902	A	G		G	SNP	IGS(cox2,trnS-TGA)
Camellia oleifera	377909	A	C		C	SNP	IGS(cox2,trnS-TGA)
Camellia oleifera	378024	T	G		G	SNP	IGS(cox2,trnS-TGA)
Camellia oleifera	378206	C	G		G	SNP	IGS(cox2,trnS-TGA)
Camellia oleifera	378232	T	C		C	SNP	IGS(cox2,trnS-TGA)
Camellia oleifera	378317	T	C		C	SNP	IGS(cox2,trnS-TGA)
Camellia oleifera	378320	T	C		C	SNP	IGS(cox2,trnS-TGA)
Camellia oleifera	378356	T	C		C	SNP	IGS(cox2,trnS-TGA)
Camellia oleifera	378394	T	C		C	SNP	IGS(cox2,trnS-TGA)
Camellia oleifera	378398	T	C		C	SNP	IGS(cox2,trnS-TGA)
Camellia oleifera	378427	A	T		T	SNP	IGS(cox2,trnS-TGA)
Camellia oleifera	378465	T	TC		TC	INDEL	IGS(cox2,trnS-TGA)
Camellia oleifera	378467	T	C		C	SNP	IGS(cox2,trnS-TGA)
Camellia oleifera	378625	T	C		C	SNP	IGS(cox2,trnS-TGA)
Camellia oleifera	378641	A	G		G	SNP	IGS(cox2,trnS-TGA)
Camellia oleifera	378701	A	G		G	SNP	IGS(cox2,trnS-TGA)
Camellia oleifera	378734	A	G		G	SNP	IGS(cox2,trnS-TGA)
Camellia oleifera	378794	TCTTCA	T		T	INDEL	IGS(cox2,trnS-TGA)
Camellia oleifera	378895	T	C		C	SNP	IGS(cox2,trnS-TGA)
Camellia oleifera	378924	A	C		C	SNP	IGS(cox2,trnS-TGA)
Camellia oleifera	378926	T	G		G	SNP	IGS(cox2,trnS-TGA)
Camellia oleifera	378934	T	C		C	SNP	IGS(cox2,trnS-TGA)
Camellia oleifera	378935	T	G		G	SNP	IGS(cox2,trnS-TGA)
Camellia oleifera	378944	G	T		T	SNP	IGS(cox2,trnS-TGA)
Camellia oleifera	379022	A	G		G	SNP	IGS(cox2,trnS-TGA)
Camellia oleifera	379026	A	G		G	SNP	IGS(cox2,trnS-TGA)
Camellia oleifera	379035	A	G		G	SNP	IGS(cox2,trnS-TGA)
Camellia oleifera	379077	T	C		C	SNP	IGS(cox2,trnS-TGA)
Camellia oleifera	379079	G	T		T	SNP	IGS(cox2,trnS-TGA)
Camellia oleifera	379084	C	G		G	SNP	IGS(cox2,trnS-TGA)
Camellia oleifera	379240	T	C		C	SNP	IGS(cox2,trnS-TGA)
Camellia oleifera	379248	G	GCTAA		GCTAA	INDEL	IGS(cox2,trnS-TGA)
Camellia oleifera	379305	G	A		A	SNP	IGS(cox2,trnS-TGA)
Camellia oleifera	379332	T	A		A	SNP	IGS(cox2,trnS-TGA)
Camellia oleifera	379500	GGAAAGTTGCAC	G		G	INDEL	IGS(cox2,trnS-TGA)
Camellia oleifera	379560	G	T		T	SNP	IGS(cox2,trnS-TGA)
Camellia oleifera	379605	G	A		A	SNP	IGS(cox2,trnS-TGA)
Camellia oleifera	379617	A	T		T	SNP	IGS(cox2,trnS-TGA)
Camellia oleifera	379746	A	C		C	SNP	IGS(cox2,trnS-TGA)
Camellia oleifera	379755	T	C		C	SNP	IGS(cox2,trnS-TGA)
Camellia oleifera	379823	T	C		C	SNP	IGS(cox2,trnS-TGA)
Camellia oleifera	379864	A	G		G	SNP	IGS(cox2,trnS-TGA)
Camellia oleifera	379866	T	G		G	SNP	IGS(cox2,trnS-TGA)
Camellia oleifera	379872	CT	C		C	INDEL	IGS(cox2,trnS-TGA)
Camellia oleifera	379929	CGTTCCT	C		C	INDEL	IGS(cox2,trnS-TGA)
Camellia oleifera	379956	A	C		C	SNP	IGS(cox2,trnS-TGA)
Camellia oleifera	379966	A	G		G	SNP	IGS(cox2,trnS-TGA)
Camellia oleifera	379976	C	T		T	SNP	IGS(cox2,trnS-TGA)
Camellia oleifera	380035	T	C		C	SNP	IGS(cox2,trnS-TGA)
Camellia oleifera	380060	A	G		G	SNP	IGS(cox2,trnS-TGA)
Camellia oleifera	380074	C	A		A	SNP	IGS(cox2,trnS-TGA)
Camellia oleifera	380080	T	A		A	SNP	IGS(cox2,trnS-TGA)
Camellia oleifera	380081	T	G		G	SNP	IGS(cox2,trnS-TGA)
Camellia oleifera	380203	G	A		A	SNP	IGS(cox2,trnS-TGA)
Camellia oleifera	380774	G	GGTGACC		GGTGACC	INDEL	IGS(cox2,trnS-TGA)
Camellia oleifera	380883	A	G		G	SNP	IGS(cox2,trnS-TGA)
Camellia oleifera	380952	C	CT		CT	INDEL	IGS(cox2,trnS-TGA)
Camellia oleifera	381085	T	A		A	SNP	IGS(cox2,trnS-TGA)
Camellia oleifera	381086	G	T		T	SNP	IGS(cox2,trnS-TGA)
Camellia oleifera	381087	T	G		G	SNP	IGS(cox2,trnS-TGA)
Camellia oleifera	381099	A	T		T	SNP	IGS(cox2,trnS-TGA)
Camellia oleifera	381102	T	G		G	SNP	IGS(cox2,trnS-TGA)
Camellia oleifera	381104	G	C		C	SNP	IGS(cox2,trnS-TGA)
Camellia oleifera	381129	C	T		T	SNP	IGS(cox2,trnS-TGA)
Camellia oleifera	381157	C	T		T	SNP	IGS(cox2,trnS-TGA)
Camellia oleifera	381172	C	T		T	SNP	IGS(cox2,trnS-TGA)
Camellia oleifera	381173	A	G		G	SNP	IGS(cox2,trnS-TGA)
Camellia oleifera	381306	A	AC		AC	INDEL	IGS(cox2,trnS-TGA)
Camellia oleifera	381333	T	C		C	SNP	IGS(cox2,trnS-TGA)
Camellia oleifera	381344	C	T		T	SNP	IGS(cox2,trnS-TGA)
Camellia oleifera	381356	A	G		G	SNP	IGS(cox2,trnS-TGA)
Camellia oleifera	381371	T	C		C	SNP	IGS(cox2,trnS-TGA)
Camellia oleifera	381377	T	C		C	SNP	IGS(cox2,trnS-TGA)
Camellia oleifera	381500	A	C		C	SNP	IGS(cox2,trnS-TGA)
Camellia oleifera	381515	A	G		G	SNP	IGS(cox2,trnS-TGA)
Camellia oleifera	381517	T	G		G	SNP	IGS(cox2,trnS-TGA)
Camellia oleifera	381528	A	G		G	SNP	IGS(cox2,trnS-TGA)
Camellia oleifera	381530	A	G		G	SNP	IGS(cox2,trnS-TGA)
Camellia oleifera	381551	G	A		A	SNP	IGS(cox2,trnS-TGA)
Camellia oleifera	381557	C	A		A	SNP	IGS(cox2,trnS-TGA)
Camellia oleifera	381558	T	C		C	SNP	IGS(cox2,trnS-TGA)
Camellia oleifera	381658	T	C		C	SNP	IGS(cox2,trnS-TGA)
Camellia oleifera	381688	A	G		G	SNP	IGS(cox2,trnS-TGA)
Camellia oleifera	381691	A	C		C	SNP	IGS(cox2,trnS-TGA)
Camellia oleifera	381705	A	G		G	SNP	IGS(cox2,trnS-TGA)
Camellia oleifera	381709	A	G		G	SNP	IGS(cox2,trnS-TGA)
Camellia oleifera	381806	A	G		G	SNP	IGS(cox2,trnS-TGA)
Camellia oleifera	382728	A	ACAACC	A	ACAACC	INDEL	IGS(cox2,trnS-TGA)
Camellia oleifera	383331	TGTGC	T	TGTGC	T	INDEL	IGS(cox2,trnS-TGA)
Camellia oleifera	383968	A	C	A	C	SNP	IGS(trnS-TGA,atp9)
Camellia oleifera	384705	T	TTTAAA	T	TTTAAA	INDEL	IGS(trnS-TGA,atp9)
Camellia oleifera	385993	G	GCATGTCC	G	GCATGTCC	INDEL	IGS(trnS-TGA,atp9)
Camellia oleifera	387384	AAACAAG	A	AAACAAG	A	INDEL	IGS(trnS-TGA,atp9)
Camellia oleifera	388169	GTCCTT	G	GTCCTT	G	INDEL	IGS(trnS-TGA,atp9)
Camellia oleifera	388295	CTTTTAT	C	CTTTTAT	C	INDEL	IGS(trnS-TGA,atp9)
Camellia oleifera	388543	CGTCTT	C	CGTCTT	C	INDEL	IGS(trnS-TGA,atp9)
Camellia oleifera	388635	GTGTAAT	G	GTGTAAT	G	INDEL	IGS(trnS-TGA,atp9)
Camellia oleifera	389345	TCGGAC	T	TCGGAC	T	INDEL	IGS(trnS-TGA,atp9)
Camellia oleifera	389600	A	G	A	G	SNP	IGS(trnS-TGA,atp9)
Camellia oleifera	391274	G	GT		GT	INDEL	IGS(trnS-TGA,atp9)
Camellia oleifera	392583	G	T		T	SNP	IGS(trnS-TGA,atp9)
Camellia oleifera	392607	G	T		T	SNP	IGS(trnS-TGA,atp9)
Camellia oleifera	392630	CCTTAA	C		C	INDEL	IGS(trnS-TGA,atp9)
Camellia oleifera	392814	T	TA		TA	INDEL	IGS(trnS-TGA,atp9)
Camellia oleifera	393129	A	G		G	SNP	IGS(trnS-TGA,atp9)
Camellia oleifera	393286	A	G		G	SNP	IGS(trnS-TGA,atp9)
Camellia oleifera	393393	T	G		G	SNP	IGS(trnS-TGA,atp9)
Camellia oleifera	393539	T	C		C	SNP	IGS(trnS-TGA,atp9)
Camellia oleifera	393593	A	G		G	SNP	IGS(trnS-TGA,atp9)
Camellia oleifera	393706	A	G		G	SNP	IGS(trnS-TGA,atp9)
Camellia oleifera	394046	G	A		A	SNP	IGS(trnS-TGA,atp9)
Camellia oleifera	394329	G	C		C	SNP	IGS(trnS-TGA,atp9)
Camellia oleifera	394367	CAGTAT	C		C	INDEL	IGS(trnS-TGA,atp9)
Camellia oleifera	394425	A	G		G	SNP	IGS(trnS-TGA,atp9)
Camellia oleifera	394641	A	C		C	SNP	IGS(trnS-TGA,atp9)
Camellia oleifera	394863	A	AG		AG	INDEL	IGS(trnS-TGA,atp9)
Camellia oleifera	394868	T	C		C	SNP	IGS(trnS-TGA,atp9)
Camellia oleifera	394911	A	G		G	SNP	IGS(trnS-TGA,atp9)
Camellia oleifera	394946	A	C		C	SNP	IGS(trnS-TGA,atp9)
Camellia oleifera	395194	T	C		C	SNP	IGS(trnS-TGA,atp9)
Camellia oleifera	395216	T	G		G	SNP	IGS(trnS-TGA,atp9)
Camellia oleifera	395217	T	A		A	SNP	IGS(trnS-TGA,atp9)
Camellia oleifera	395362	T	C		C	SNP	IGS(trnS-TGA,atp9)
Camellia oleifera	395659	A	G		G	SNP	IGS(trnS-TGA,atp9)
Camellia oleifera	395753	T	C		C	SNP	IGS(trnS-TGA,atp9)
Camellia oleifera	395800	AC	A		A	INDEL	IGS(trnS-TGA,atp9)
Camellia oleifera	395841	T	C		C	SNP	IGS(trnS-TGA,atp9)
Camellia oleifera	395926	A	G		G	SNP	IGS(trnS-TGA,atp9)
Camellia oleifera	395944	T	C		C	SNP	IGS(trnS-TGA,atp9)
Camellia oleifera	396031	G	C		C	SNP	IGS(trnS-TGA,atp9)
Camellia oleifera	396045	GC	G		G	INDEL	IGS(trnS-TGA,atp9)
Camellia oleifera	396049	CA	C		C	INDEL	IGS(trnS-TGA,atp9)
Camellia oleifera	396177	G	GGTGCTA		GGTGCTA	INDEL	IGS(trnS-TGA,atp9)
Camellia oleifera	396270	A	G		G	SNP	IGS(trnS-TGA,atp9)
Camellia oleifera	396275	A	C		C	SNP	IGS(trnS-TGA,atp9)
Camellia oleifera	396418	C	T		T	SNP	IGS(trnS-TGA,atp9)
Camellia oleifera	396822	T	TAACTA		TAACTA	INDEL	IGS(trnS-TGA,atp9)
Camellia oleifera	396967	T	G		G	SNP	IGS(trnS-TGA,atp9)
Camellia oleifera	397009	T	C		C	SNP	IGS(trnS-TGA,atp9)
Camellia oleifera	397013	A	G		G	SNP	IGS(trnS-TGA,atp9)
Camellia oleifera	397058	C	G		G	SNP	IGS(trnS-TGA,atp9)
Camellia oleifera	397142	G	A		A	SNP	IGS(trnS-TGA,atp9)
Camellia oleifera	397240	T	C		C	SNP	IGS(trnS-TGA,atp9)
Camellia oleifera	397351	A	G		G	SNP	IGS(trnS-TGA,atp9)
Camellia oleifera	397422	T	C		C	SNP	IGS(trnS-TGA,atp9)
Camellia oleifera	397484	G	A		A	SNP	IGS(trnS-TGA,atp9)
Camellia oleifera	397589	T	G		G	SNP	IGS(trnS-TGA,atp9)
Camellia oleifera	398144	C	CAGCAAT		CAGCAAT	INDEL	IGS(trnS-TGA,atp9)
Camellia oleifera	398186	A	G		G	SNP	IGS(trnS-TGA,atp9)
Camellia oleifera	398197	T	C		C	SNP	IGS(trnS-TGA,atp9)
Camellia oleifera	398225	A	G		G	SNP	IGS(trnS-TGA,atp9)
Camellia oleifera	398487	T	G		G	SNP	IGS(trnS-TGA,atp9)
Camellia oleifera	398549	A	C		C	SNP	IGS(trnS-TGA,atp9)
Camellia oleifera	400231	CCCGCCTTT	C	CCCGCCTTT	C	INDEL	IGS(trnS-TGA,atp9)
Camellia oleifera	400306	G	T	G	T	SNP	IGS(trnS-TGA,atp9)
Camellia oleifera	400313	C	CCAAAA	C	CCAAAA	INDEL	IGS(trnS-TGA,atp9)
Camellia oleifera	401332	C	CTTAAAA	C	CTTAAAA	INDEL	IGS(trnS-TGA,atp9)
Camellia oleifera	401730	G	GGTCAA	G	GGTCAA	INDEL	IGS(trnS-TGA,atp9)
Camellia oleifera	402295	T	G	T	G	SNP	IGS(trnS-TGA,atp9)
Camellia oleifera	403675	G	T	G	T	SNP	IGS(trnS-TGA,atp9)
Camellia oleifera	403676	A	T	A	T	SNP	IGS(trnS-TGA,atp9)
Camellia oleifera	403678	A	T	A	T	SNP	IGS(trnS-TGA,atp9)
Camellia oleifera	405003	A	G	A	G	SNP	IGS(trnS-TGA,atp9)
Camellia oleifera	405151	T	G	T	G	SNP	IGS(trnS-TGA,atp9)
Camellia oleifera	405649	GAAGAA	G	GAAGAA	G	INDEL	IGS(trnS-TGA,atp9)
Camellia oleifera	407625	A	C	A	C	SNP	IGS(trnS-TGA,atp9)
Camellia oleifera	408659	T	TCTTATA	T	TCTTATA	INDEL	IGS(trnS-TGA,atp9)
Camellia oleifera	408946	TTATCC	T	TTATCC	T	INDEL	IGS(trnS-TGA,atp9)
Camellia oleifera	410519	C	T	C	T	SNP	IGS(trnS-TGA,atp9)
Camellia oleifera	410708	A	ACTGTGC	A	ACTGTGC	INDEL	IGS(trnS-TGA,atp9)
Camellia oleifera	412756	C	CGTTCT	C	CGTTCT	INDEL	IGS(trnS-TGA,atp9)
Camellia oleifera	413480	C	T	C	T	SNP	IGS(trnS-TGA,atp9)
Camellia oleifera	418440	CCAAAA	C	CCAAAA	C	INDEL	IGS(trnS-TGA,atp9)
Camellia oleifera	420401	G	GGTACT	G	GGTACT	INDEL	IGS(trnS-TGA,atp9)
Camellia oleifera	420473	GAAAGAAA	G	GAAAGAAA	G	INDEL	IGS(trnS-TGA,atp9)
Camellia oleifera	421323	AAGTTTC	A	AAGTTTC	A	INDEL	IGS(atp9,atp1)
Camellia oleifera	422847	G	GGTTGC	G	GGTTGC	INDEL	IGS(atp9,atp1)
Camellia oleifera	422904	C	A	C	A	SNP	IGS(atp9,atp1)
Camellia oleifera	423100	CTTAAAA	C	CTTAAAA	C	INDEL	IGS(atp9,atp1)
Camellia oleifera	423226	C	CCGATAA	C	CCGATAA	INDEL	IGS(atp9,atp1)
Camellia oleifera	424298	G	T	G	T	SNP	IGS(atp9,atp1)
Camellia oleifera	430482	C	A	C	A	SNP	IGS(atp9,atp1)
Camellia oleifera	431536	GGTAATA	G	GGTAATA	G	INDEL	IGS(atp9,atp1)
Camellia oleifera	431796	T	TCTAATA	T	TCTAATA	INDEL	IGS(atp9,atp1)
Camellia oleifera	432818	C	T	C	T	SNP	IGS(atp9,atp1)
Camellia oleifera	437867	C	CTTACA	C	CTTACA	INDEL	IGS(atp9,atp1)
Camellia oleifera	438362	A	ATGAAC	A	ATGAAC	INDEL	IGS(atp9,atp1)
Camellia oleifera	440136	G	GAAGGAT	G	GAAGGAT	INDEL	IGS(atp9,atp1)
Camellia oleifera	440349	C	CTTATA	C	CTTATA	INDEL	IGS(atp9,atp1)
Camellia oleifera	440457	A	C	A	C	SNP	IGS(atp9,atp1)
Camellia oleifera	446066	G	GGGAAGT	G	GGGAAGT	INDEL	IGS(atp9,atp1)
Camellia oleifera	446851	GGAAGA	G	GGAAGA	G	INDEL	IGS(atp9,atp1)
Camellia oleifera	448768	T	A	T	A	SNP	IGS(atp9,atp1)
Camellia oleifera	450302	C	T	C	T	SNP	atp1
Camellia oleifera	450488	C	T	C	T	SNP	IGS(atp1,rps4)
Camellia oleifera	450558	T	G	G	T	SNP	IGS(atp1,rps4)
Camellia oleifera	450582	A	G	A	G	SNP	IGS(atp1,rps4)
Camellia oleifera	450645	A	T		T	SNP	IGS(atp1,rps4)
Camellia oleifera	450685	G	A		A	SNP	IGS(atp1,rps4)
Camellia oleifera	450719	C	T		T	SNP	IGS(atp1,rps4)
Camellia oleifera	450735	C	T		T	SNP	IGS(atp1,rps4)
Camellia oleifera	450959	A	G		G	SNP	IGS(atp1,rps4)
Camellia oleifera	451087	T	C		C	SNP	IGS(atp1,rps4)
Camellia oleifera	451138	C	A		A	SNP	IGS(atp1,rps4)
Camellia oleifera	451254	T	G		G	SNP	IGS(atp1,rps4)
Camellia oleifera	451842	C	T		T	SNP	IGS(atp1,rps4)
Camellia oleifera	451999	A	G		G	SNP	IGS(atp1,rps4)
Camellia oleifera	452237	G	A		A	SNP	IGS(atp1,rps4)
Camellia oleifera	452976	T	C		C	SNP	IGS(atp1,rps4)
Camellia oleifera	453101	T	C		C	SNP	IGS(atp1,rps4)
Camellia oleifera	453424	T	C		C	SNP	IGS(atp1,rps4)
Camellia oleifera	453437	G	A		A	SNP	IGS(atp1,rps4)
Camellia oleifera	453870	A	G		G	SNP	IGS(atp1,rps4)
Camellia oleifera	453953	C	T		T	SNP	IGS(atp1,rps4)
Camellia oleifera	454350	C	T		T	SNP	IGS(atp1,rps4)
Camellia oleifera	456416	A	ACTTT	A	ACTTT	INDEL	IGS(atp1,rps4)
Camellia oleifera	460439	T	TACCAC	T	TACCAC	INDEL	IGS(atp1,rps4)
Camellia oleifera	464544	AAAAC	A	AAAAC	A	INDEL	IGS(atp1,rps4)
Camellia oleifera	465556	A	AAGAAC	A	AAGAAC	INDEL	IGS(atp1,rps4)
Camellia oleifera	465741	T	G	T	G	SNP	IGS(atp1,rps4)
Camellia oleifera	466206	C	CCCTTT	C	CCCTTT	INDEL	IGS(atp1,rps4)
Camellia oleifera	466770	C	G	C	G	SNP	IGS(atp1,rps4)
Camellia oleifera	467129	C	CCATGT	C	CCATGT	INDEL	IGS(atp1,rps4)
Camellia oleifera	467647	CGAAGT	C	CGAAGT	C	INDEL	IGS(atp1,rps4)
Camellia oleifera	468852	G	T	G	T	SNP	rps4
Camellia oleifera	472009	C	CGTGATA	C	CGTGATA	INDEL	IGS(nad6,trnS-TGA-2)
Camellia oleifera	472555	CGGTTAT	C	CGGTTAT	C	INDEL	IGS(nad6,trnS-TGA-2)
Camellia oleifera	472835	TATTAAG	T	TATTAAG	T	INDEL	IGS(nad6,trnS-TGA-2)
Camellia oleifera	473157	A	C	A	C	SNP	IGS(nad6,trnS-TGA-2)
Camellia oleifera	473168	A	C	A	C	SNP	IGS(nad6,trnS-TGA-2)
Camellia oleifera	474094	C	T	C	T	SNP	IGS(nad6,trnS-TGA-2)
Camellia oleifera	474096	C	A	C	A	SNP	IGS(nad6,trnS-TGA-2)
Camellia oleifera	475046	C	A	C	A	SNP	IGS(nad6,trnS-TGA-2)
Camellia oleifera	476316	C	A	C	A	SNP	IGS(nad6,trnS-TGA-2)
Camellia oleifera	476469	T	G	T	G	SNP	IGS(nad6,trnS-TGA-2)
Camellia oleifera	476847	G	GGTTAGGCA	G	GGTTAGGCA	INDEL	IGS(nad6,trnS-TGA-2)
Camellia oleifera	480982	AAGGAAC	A		A	INDEL	IGS(nad6,trnS-TGA-2)
Camellia oleifera	481008	T	G		G	SNP	IGS(nad6,trnS-TGA-2)
Camellia oleifera	481096	G	C		C	SNP	IGS(nad6,trnS-TGA-2)
Camellia oleifera	481313	A	C		C	SNP	IGS(nad6,trnS-TGA-2)
Camellia oleifera	481314	G	T		T	SNP	IGS(nad6,trnS-TGA-2)
Camellia oleifera	481315	C	T		T	SNP	IGS(nad6,trnS-TGA-2)
Camellia oleifera	481689	C	G	C	G	SNP	IGS(nad6,trnS-TGA-2)
Camellia oleifera	481745	G	T	G	T	SNP	IGS(nad6,trnS-TGA-2)
Camellia oleifera	481825	A	G	A	G	SNP	IGS(nad6,trnS-TGA-2)
Camellia oleifera	481981	T	C	T	C	SNP	IGS(nad6,trnS-TGA-2)
Camellia oleifera	482200	T	G	T	G	SNP	IGS(nad6,trnS-TGA-2)
Camellia oleifera	482233	CAGAAA	C	CAGAAA	C	INDEL	IGS(nad6,trnS-TGA-2)
Camellia oleifera	482627	A	AGTCTC	A	AGTCTC	INDEL	IGS(nad6,trnS-TGA-2)
Camellia oleifera	482950	G	T	G	T	SNP	IGS(nad6,trnS-TGA-2)
Camellia oleifera	483844	CTTTTAA	C	CTTTTAA	C	INDEL	IGS(nad6,trnS-TGA-2)
Camellia oleifera	484652	G	T	G	T	SNP	IGS(nad6,trnS-TGA-2)
Camellia oleifera	485773	A	G		G	SNP	IGS(nad6,trnS-TGA-2)
Camellia oleifera	486171	T	C		C	SNP	IGS(nad6,trnS-TGA-2)
Camellia oleifera	486191	A	G		G	SNP	IGS(nad6,trnS-TGA-2)
Camellia oleifera	486247	T	C		C	SNP	IGS(nad6,trnS-TGA-2)
Camellia oleifera	486257	G	A		A	SNP	IGS(nad6,trnS-TGA-2)
Camellia oleifera	486287	A	G		G	SNP	IGS(nad6,trnS-TGA-2)
Camellia oleifera	486374	C	T		T	SNP	IGS(nad6,trnS-TGA-2)
Camellia oleifera	486395	C	T		T	SNP	IGS(nad6,trnS-TGA-2)
Camellia oleifera	486396	A	C		C	SNP	IGS(nad6,trnS-TGA-2)
Camellia oleifera	486464	G	C		C	SNP	IGS(nad6,trnS-TGA-2)
Camellia oleifera	486468	A	G		G	SNP	IGS(nad6,trnS-TGA-2)
Camellia oleifera	486476	T	C		C	SNP	IGS(nad6,trnS-TGA-2)
Camellia oleifera	486478	A	G		G	SNP	IGS(nad6,trnS-TGA-2)
Camellia oleifera	486509	T	A		A	SNP	IGS(nad6,trnS-TGA-2)
Camellia oleifera	486519	T	C		C	SNP	IGS(nad6,trnS-TGA-2)
Camellia oleifera	486535	A	G		G	SNP	IGS(nad6,trnS-TGA-2)
Camellia oleifera	486679	A	G		G	SNP	IGS(nad6,trnS-TGA-2)
Camellia oleifera	486828	T	C		C	SNP	IGS(nad6,trnS-TGA-2)
Camellia oleifera	486844	T	C		C	SNP	IGS(nad6,trnS-TGA-2)
Camellia oleifera	486852	A	G		G	SNP	IGS(nad6,trnS-TGA-2)
Camellia oleifera	486878	T	C		C	SNP	IGS(nad6,trnS-TGA-2)
Camellia oleifera	486925	A	G		G	SNP	IGS(nad6,trnS-TGA-2)
Camellia oleifera	486962	T	C		C	SNP	IGS(nad6,trnS-TGA-2)
Camellia oleifera	487079	A	G		G	SNP	IGS(nad6,trnS-TGA-2)
Camellia oleifera	487090	T	C		C	SNP	IGS(nad6,trnS-TGA-2)
Camellia oleifera	487121	A	G		G	SNP	IGS(nad6,trnS-TGA-2)
Camellia oleifera	487125	C	A		A	SNP	IGS(nad6,trnS-TGA-2)
Camellia oleifera	487131	A	G		G	SNP	IGS(nad6,trnS-TGA-2)
Camellia oleifera	487138	T	C		C	SNP	IGS(nad6,trnS-TGA-2)
Camellia oleifera	487224	T	C		C	SNP	IGS(nad6,trnS-TGA-2)
Camellia oleifera	487230	T	A		A	SNP	IGS(nad6,trnS-TGA-2)
Camellia oleifera	487257	A	G		G	SNP	IGS(nad6,trnS-TGA-2)
Camellia oleifera	487258	A	G		G	SNP	IGS(nad6,trnS-TGA-2)
Camellia oleifera	487265	T	C		C	SNP	IGS(nad6,trnS-TGA-2)
Camellia oleifera	487291	T	G		G	SNP	IGS(nad6,trnS-TGA-2)
Camellia oleifera	487301	A	G		G	SNP	IGS(nad6,trnS-TGA-2)
Camellia oleifera	487306	T	A		A	SNP	IGS(nad6,trnS-TGA-2)
Camellia oleifera	487351	A	AG		AG	INDEL	IGS(nad6,trnS-TGA-2)
Camellia oleifera	487639	T	C		C	SNP	IGS(nad6,trnS-TGA-2)
Camellia oleifera	488085	T	C		C	SNP	IGS(nad6,trnS-TGA-2)
Camellia oleifera	488290	T	C		C	SNP	IGS(nad6,trnS-TGA-2)
Camellia oleifera	488686	A	G		G	SNP	IGS(nad6,trnS-TGA-2)
Camellia oleifera	488950	G	C		C	SNP	IGS(nad6,trnS-TGA-2)
Camellia oleifera	489584	G	A		A	SNP	IGS(nad6,trnS-TGA-2)
Camellia oleifera	489589	T	C		C	SNP	IGS(nad6,trnS-TGA-2)
Camellia oleifera	489597	T	C		C	SNP	IGS(nad6,trnS-TGA-2)
Camellia oleifera	489617	T	C		C	SNP	IGS(nad6,trnS-TGA-2)
Camellia oleifera	489688	T	C		C	SNP	IGS(nad6,trnS-TGA-2)
Camellia oleifera	489689	A	G		G	SNP	IGS(nad6,trnS-TGA-2)
Camellia oleifera	489698	A	C		C	SNP	IGS(nad6,trnS-TGA-2)
Camellia oleifera	489717	C	T		T	SNP	IGS(nad6,trnS-TGA-2)
Camellia oleifera	489804	A	G		G	SNP	IGS(nad6,trnS-TGA-2)
Camellia oleifera	489837	A	G		G	SNP	IGS(nad6,trnS-TGA-2)
Camellia oleifera	489840	A	G		G	SNP	IGS(nad6,trnS-TGA-2)
Camellia oleifera	489874	A	G		G	SNP	IGS(nad6,trnS-TGA-2)
Camellia oleifera	489889	A	G		G	SNP	IGS(nad6,trnS-TGA-2)
Camellia oleifera	489932	T	C		C	SNP	IGS(nad6,trnS-TGA-2)
Camellia oleifera	490043	T	A		A	SNP	IGS(nad6,trnS-TGA-2)
Camellia oleifera	490081	T	G		G	SNP	IGS(nad6,trnS-TGA-2)
Camellia oleifera	490090	C	T		T	SNP	IGS(nad6,trnS-TGA-2)
Camellia oleifera	490092	A	G		G	SNP	IGS(nad6,trnS-TGA-2)
Camellia oleifera	490093	C	A		A	SNP	IGS(nad6,trnS-TGA-2)
Camellia oleifera	490098	A	G		G	SNP	IGS(nad6,trnS-TGA-2)
Camellia oleifera	490175	A	G		G	SNP	IGS(nad6,trnS-TGA-2)
Camellia oleifera	490675	T	C		C	SNP	IGS(nad6,trnS-TGA-2)
Camellia oleifera	490842	T	C		C	SNP	IGS(nad6,trnS-TGA-2)
Camellia oleifera	490898	T	C		C	SNP	IGS(nad6,trnS-TGA-2)
Camellia oleifera	490911	A	C		C	SNP	IGS(nad6,trnS-TGA-2)
Camellia oleifera	490917	A	G		G	SNP	IGS(nad6,trnS-TGA-2)
Camellia oleifera	490942	T	C		C	SNP	IGS(nad6,trnS-TGA-2)
Camellia oleifera	490956	G	A		A	SNP	IGS(nad6,trnS-TGA-2)
Camellia oleifera	490960	A	C		C	SNP	IGS(nad6,trnS-TGA-2)
Camellia oleifera	490966	T	C		C	SNP	IGS(nad6,trnS-TGA-2)
Camellia oleifera	490974	T	C		C	SNP	IGS(nad6,trnS-TGA-2)
Camellia oleifera	491001	T	C		C	SNP	IGS(nad6,trnS-TGA-2)
Camellia oleifera	491010	T	C		C	SNP	IGS(nad6,trnS-TGA-2)
Camellia oleifera	491045	A	G		G	SNP	IGS(nad6,trnS-TGA-2)
Camellia oleifera	491091	A	G		G	SNP	IGS(nad6,trnS-TGA-2)
Camellia oleifera	491297	A	G		G	SNP	IGS(nad6,trnS-TGA-2)
Camellia oleifera	491644	A	G		G	SNP	IGS(nad6,trnS-TGA-2)
Camellia oleifera	492199	T	C		C	SNP	IGS(nad6,trnS-TGA-2)
Camellia oleifera	492268	G	T		T	SNP	IGS(nad6,trnS-TGA-2)
Camellia oleifera	492270	T	C		C	SNP	IGS(nad6,trnS-TGA-2)
Camellia oleifera	492640	A	G		G	SNP	IGS(nad6,trnS-TGA-2)
Camellia oleifera	492645	T	TC		TC	INDEL	IGS(nad6,trnS-TGA-2)
Camellia oleifera	492744	G	T		T	SNP	IGS(nad6,trnS-TGA-2)
Camellia oleifera	493071	A	G		G	SNP	IGS(nad6,trnS-TGA-2)
Camellia oleifera	493471	T	C		C	SNP	IGS(nad6,trnS-TGA-2)
Camellia oleifera	493487	A	G		G	SNP	IGS(nad6,trnS-TGA-2)
Camellia oleifera	493793	C	A		A	SNP	IGS(nad6,trnS-TGA-2)
Camellia oleifera	493826	A	G		G	SNP	IGS(nad6,trnS-TGA-2)
Camellia oleifera	494509	T	C		C	SNP	IGS(nad6,trnS-TGA-2)
Camellia oleifera	494521	A	G		G	SNP	IGS(nad6,trnS-TGA-2)
Camellia oleifera	494593	A	G		G	SNP	IGS(nad6,trnS-TGA-2)
Camellia oleifera	495117	A	C		C	SNP	IGS(nad6,trnS-TGA-2)
Camellia oleifera	495118	G	C		C	SNP	IGS(nad6,trnS-TGA-2)
Camellia oleifera	495365	A	C		C	SNP	IGS(nad6,trnS-TGA-2)
Camellia oleifera	495367	A	G		G	SNP	IGS(nad6,trnS-TGA-2)
Camellia oleifera	495432	G	A		A	SNP	IGS(nad6,trnS-TGA-2)
Camellia oleifera	495524	CA	C		C	INDEL	IGS(nad6,trnS-TGA-2)
Camellia oleifera	495551	T	C		C	SNP	IGS(nad6,trnS-TGA-2)
Camellia oleifera	495699	T	G		G	SNP	IGS(nad6,trnS-TGA-2)
Camellia oleifera	495701	G	T		T	SNP	IGS(nad6,trnS-TGA-2)
Camellia oleifera	496920	T	A	T	A	SNP	IGS(nad6,trnS-TGA-2)
Camellia oleifera	499294	G	GGTAT	G	GGTAT	INDEL	IGS(nad6,trnS-TGA-2)
Camellia oleifera	500512	CAGTAA	C	CAGTAA	C	INDEL	IGS(nad6,trnS-TGA-2)
Camellia oleifera	501086	AAAGAC	A	AAAGAC	A	INDEL	IGS(nad6,trnS-TGA-2)
Camellia oleifera	501323	G	GAAAGGA	G	GAAAGGA	INDEL	IGS(nad6,trnS-TGA-2)
Camellia oleifera	505137	CTTTTA	C	CTTTTA	C	INDEL	IGS(nad6,trnS-TGA-2)
Camellia oleifera	506000	G	GA	G	GA	INDEL	IGS(nad6,trnS-TGA-2)
Camellia oleifera	507259	C	A	C	A	SNP	IGS(nad6,trnS-TGA-2)
Camellia oleifera	507819	A	AGTGATT	A	AGTGATT	INDEL	IGS(nad6,trnS-TGA-2)
Camellia oleifera	508226	G	GTGCGAATA	G	GTGCGAATA	INDEL	IGS(nad6,trnS-TGA-2)
Camellia oleifera	510447	ACTAAT	A	ACTAAT	A	INDEL	IGS(nad6,trnS-TGA-2)
Camellia oleifera	511492	C	A	C	A	SNP	IGS(nad6,trnS-TGA-2)
Camellia oleifera	511493	T	G	T	G	SNP	IGS(nad6,trnS-TGA-2)
Camellia oleifera	511494	T	G	T	G	SNP	IGS(nad6,trnS-TGA-2)
Camellia oleifera	511994	G	GACTAC	G	GACTAC	INDEL	IGS(trnS-TGA-2,trnF-AAA)
Camellia oleifera	512900	GTTGATTTAC	G	GTTGATTTAC	G	INDEL	IGS(trnS-TGA-2,trnF-AAA)
Camellia oleifera	514776	ATTTAC	A	ATTTAC	A	INDEL	IGS(trnS-TGA-2,trnF-AAA)
Camellia oleifera	514892	GGTCACT	G	GGTCACT	G	INDEL	IGS(trnS-TGA-2,trnF-AAA)
Camellia oleifera	514977	C	CCGGCAA	C	CCGGCAA	INDEL	IGS(trnS-TGA-2,trnF-AAA)
Camellia oleifera	515045	C	CTTGAAA	C	CTTGAAA	INDEL	IGS(trnS-TGA-2,trnF-AAA)
Camellia oleifera	515798	A	ACGAACT	A	ACGAACT	INDEL	IGS(trnS-TGA-2,trnF-AAA)
Camellia oleifera	522203	T	TGATCAC	T	TGATCAC	INDEL	IGS(trnF-AAA,nad7)
Camellia oleifera	523404	G	T	G	T	SNP	IGS(trnF-AAA,nad7)
Camellia oleifera	524919	G	T	G	T	SNP	IGS(trnF-AAA,nad7)
Camellia oleifera	524920	A	C	A	C	SNP	IGS(trnF-AAA,nad7)
Camellia oleifera	525410	C	A	C	A	SNP	IGS(trnF-AAA,nad7)
Camellia oleifera	526807	A	AAAATG	A	AAAATG	INDEL	IGS(trnF-AAA,nad7)
Camellia oleifera	527475	A	C	A	C	SNP	nad7-exon1
Camellia oleifera	528254	C	G	C	G	SNP	nad7-intron1
Camellia oleifera	529849	C	CCGAAA	C	CCGAAA	INDEL	nad7-intron2
Camellia oleifera	529912	GGGTTT	G	GGGTTT	G	INDEL	nad7-intron2
Camellia oleifera	531358	CCAAGAA	C	CCAAGAA	C	INDEL	nad7-intron3
Camellia oleifera	533021	T	G	T	G	SNP	nad7-intron4
Camellia oleifera	533022	A	T	A	T	SNP	nad7-intron4
Camellia oleifera	535467	C	CAACAA	C	CAACAA	INDEL	IGS(nad7,nad3)
Camellia oleifera	535650	T	G	T	G	SNP	IGS(nad7,nad3)
Camellia oleifera	553050	T	A	T	A	SNP	IGS(nad7,nad3)
Camellia oleifera	553125	G	GGGTAT	G	GGGTAT	INDEL	IGS(nad7,nad3)
Camellia oleifera	553360	A	C	A	C	SNP	IGS(nad7,nad3)
Camellia oleifera	553682	C	CA	C	CA	INDEL	IGS(nad7,nad3)
Camellia oleifera	554105	A	G	A	G	SNP	IGS(nad7,nad3)
Camellia oleifera	554200	A	G	A	G	SNP	IGS(nad7,nad3)
Camellia oleifera	554269	T	C	T	C	SNP	IGS(nad7,nad3)
Camellia oleifera	554873	A	C	A	C	SNP	IGS(nad7,nad3)
Camellia oleifera	555025	C	CCTGGAA	C	CCTGGAA	INDEL	IGS(nad7,nad3)
Camellia oleifera	556023	T	C	T	C	SNP	IGS(nad7,nad3)
Camellia oleifera	556597	CGCTAA	C	CGCTAA	C	INDEL	IGS(nad7,nad3)
Camellia oleifera	557011	T	TGTTACG	T	TGTTACG	INDEL	IGS(nad7,nad3)
Camellia oleifera	561971	A	AGCGCC	A	AGCGCC	INDEL	IGS(nad7,nad3)
Camellia oleifera	562623	A	AATTTG	A	AATTTG	INDEL	IGS(nad7,nad3)
Camellia oleifera	562777	G	GGTGTT	G	GGTGTT	INDEL	IGS(nad7,nad3)
Camellia oleifera	563537	C	CCCAAT	C	CCCAAT	INDEL	IGS(nad7,nad3)
Camellia oleifera	563705	GCAATGA	G	GCAATGA	G	INDEL	IGS(nad7,nad3)
Camellia oleifera	564551	A	T	A	T	SNP	IGS(nad7,nad3)
Camellia oleifera	565140	A	C	A	C	SNP	IGS(nad7,nad3)
Camellia oleifera	565153	A	AGTCTTAG	A	AGTCTTAG	INDEL	IGS(nad7,nad3)
Camellia oleifera	565227	T	G	T	G	SNP	IGS(nad7,nad3)
Camellia oleifera	569925	A	T	A	T	SNP	IGS(rps12-2,nad5)
Camellia oleifera	569926	A	T	A	T	SNP	IGS(rps12-2,nad5)
Camellia oleifera	570014	A	ACCTATACAT	A	ACCTATACAT	INDEL	IGS(rps12-2,nad5)
Camellia oleifera	571377	A	ATGCCCCAACAGTG	A	ATGCCCCAACAGTG	INDEL	IGS(rps12-2,nad5)
Camellia oleifera	572320	C	A	C	A	SNP	IGS(rps12-2,nad5)
Camellia oleifera	572496	A	C	A	C	SNP	IGS(rps12-2,nad5)
Camellia oleifera	574955	A	C	A	C	SNP	IGS(rps12-2,nad5)
Camellia oleifera	575450	G	T	G	T	SNP	IGS(rps12-2,nad5)
Camellia oleifera	577137	AAGCTAC	A	AAGCTAC	A	INDEL	IGS(rps12-2,nad5)
Camellia oleifera	578828	CATTCGG	C	CATTCGG	C	INDEL	IGS(rps12-2,nad5)
Camellia oleifera	580191	T	G	T	G	SNP	IGS(rps12-2,nad5)
Camellia oleifera	580192	C	A	C	A	SNP	IGS(rps12-2,nad5)
Camellia oleifera	582543	C	A	C	A	SNP	IGS(rps12-2,nad5)
Camellia oleifera	584262	C	CGTCT	C	CGTCT	INDEL	IGS(rps12-2,nad5)
Camellia oleifera	587326	C	CATAAA	C	CATAAA	INDEL	IGS(rps12-2,nad5)
Camellia oleifera	588338	CATAAAA	C	CATAAAA	C	INDEL	IGS(rps12-2,nad5)
Camellia oleifera	589528	T	A	T	A	SNP	IGS(rps12-2,nad5)
Camellia oleifera	589686	G	GGTATA	G	GGTATA	INDEL	IGS(rps12-2,nad5)
Camellia oleifera	593990	G	T	G	T	SNP	IGS(rps12-2,nad5)
Camellia oleifera	597054	A	C	A	C	SNP	IGS(rps12-2,nad5)
Camellia oleifera	597658	T	G	T	G	SNP	IGS(rps12-2,nad5)
Camellia oleifera	598325	G	T	G	T	SNP	IGS(rps12-2,nad5)
Camellia oleifera	598328	T	G	T	G	SNP	IGS(rps12-2,nad5)
Camellia oleifera	598934	A	G		G	SNP	IGS(rps12-2,nad5)
Camellia oleifera	599254	A	G	A	G	SNP	IGS(rps12-2,nad5)
Camellia oleifera	599733	A	AGGTTT	A	AGGTTT	INDEL	IGS(nad5,trnT-TGT)
Camellia oleifera	602040	GTATCAC	G	GTATCAC	G	INDEL	IGS(nad5,trnT-TGT)
Camellia oleifera	602442	AGTTTG	A	AGTTTG	A	INDEL	IGS(nad5,trnT-TGT)
Camellia oleifera	603220	C	CTTAAAG	C	CTTAAAG	INDEL	IGS(nad5,trnT-TGT)
Camellia oleifera	603518	CAAATA	C	CAAATA	C	INDEL	IGS(nad5,trnT-TGT)
Camellia oleifera	603961	A	AGTGAAC	A	AGTGAAC	INDEL	IGS(nad5,trnT-TGT)
Camellia oleifera	604601	GGAAAGA	G	GGAAAGA	G	INDEL	IGS(nad5,trnT-TGT)
Camellia oleifera	604831	G	T	G	T	SNP	IGS(nad5,trnT-TGT)
Camellia oleifera	608385	G	GTTTCTA	G	GTTTCTA	INDEL	IGS(nad5,trnT-TGT)
Camellia oleifera	609265	C	CATAGAAA	C	CATAGAAA	INDEL	IGS(nad5,trnT-TGT)
Camellia oleifera	611589	T	TTGGAA	T	TTGGAA	INDEL	IGS(nad5,trnT-TGT)
Camellia oleifera	612032	C	CAATAAG	C	CAATAAG	INDEL	IGS(nad5,trnT-TGT)
Camellia oleifera	613485	A	AAAAG	A	AAAAG	INDEL	IGS(nad5,trnT-TGT)
Camellia oleifera	614714	GCTTAT	G	GCTTAT	G	INDEL	IGS(nad5,trnT-TGT)
Camellia oleifera	614793	TTTCTTC	T	TTTCTTC	T	INDEL	IGS(nad5,trnT-TGT)
Camellia oleifera	615129	C	A	C	A	SNP	IGS(nad5,trnT-TGT)
Camellia oleifera	615909	A	ACCTGGAAG	A	ACCTGGAAG	INDEL	IGS(trnT-TGT,sdh4)
Camellia oleifera	616198	A	G	A	G	SNP	IGS(trnT-TGT,sdh4)
Camellia oleifera	616416	C	A	C	A	SNP	IGS(trnT-TGT,sdh4)
Camellia oleifera	616971	G	T	G	T	SNP	IGS(trnT-TGT,sdh4)
Camellia oleifera	625205	A	C	A	C	SNP	IGS(trnT-TGT,sdh4)
Camellia oleifera	628073	G	T	G	T	SNP	IGS(trnT-TGT,sdh4)
Camellia oleifera	628086	A	G	A	G	SNP	IGS(trnT-TGT,sdh4)
Camellia oleifera	628136	G	A	G	A	SNP	IGS(trnT-TGT,sdh4)
Camellia oleifera	628149	A	G	A	G	SNP	IGS(trnT-TGT,sdh4)
Camellia oleifera	628173	G	A	G	A	SNP	IGS(trnT-TGT,sdh4)
Camellia oleifera	628180	A	G	A	G	SNP	IGS(trnT-TGT,sdh4)
Camellia oleifera	631377	T	A	T	A	SNP	IGS(trnT-TGT,sdh4)
Camellia oleifera	631576	G	T	G	T	SNP	IGS(trnT-TGT,sdh4)
Camellia oleifera	631997	A	ACTAC	A	ACTAC	INDEL	IGS(trnT-TGT,sdh4)
Camellia oleifera	640139	C	CAGAACA	C	CAGAACA	INDEL	IGS(trnT-TGT,sdh4)
Camellia oleifera	640287	AGTGGCT	A	AGTGGCT	A	INDEL	IGS(trnT-TGT,sdh4)
Camellia oleifera	641094	GGTGTTC	G	GGTGTTC	G	INDEL	IGS(trnT-TGT,sdh4)
Camellia oleifera	641874	T	TCTTTGA	T	TCTTTGA	INDEL	IGS(trnT-TGT,sdh4)
Camellia oleifera	642485	GAAACA	G	GAAACA	G	INDEL	IGS(trnT-TGT,sdh4)
Camellia oleifera	646043	A	T	A	T	SNP	IGS(trnT-TGT,sdh4)
Camellia oleifera	646045	G	T	G	T	SNP	IGS(trnT-TGT,sdh4)
Camellia oleifera	646592	C	CTTTCA	C	CTTTCA	INDEL	IGS(trnT-TGT,sdh4)
Camellia oleifera	647440	A	C	A	C	SNP	IGS(trnT-TGT,sdh4)
Camellia oleifera	650082	C	A	C	A	SNP	IGS(trnT-TGT,sdh4)
Camellia oleifera	655699	TTAATCA	T	TTAATCA	T	INDEL	IGS(trnT-TGT,sdh4)
Camellia oleifera	656189	A	C	A	C	SNP	IGS(trnT-TGT,sdh4)
Camellia oleifera	656310	C	CTGTAT	C	CTGTAT	INDEL	IGS(trnT-TGT,sdh4)
Camellia oleifera	656322	C	A	C	A	SNP	IGS(trnT-TGT,sdh4)
Camellia oleifera	658068	GGTTATCT	G	GGTTATCT	G	INDEL	IGS(trnT-TGT,sdh4)
Camellia oleifera	660142	C	CTAATAG	C	CTAATAG	INDEL	IGS(trnT-TGT,sdh4)
Camellia oleifera	660687	CAATAA	C	CAATAA	C	INDEL	IGS(trnT-TGT,sdh4)
Camellia oleifera	663648	C	A	C	A	SNP	IGS(trnT-TGT,sdh4)
Camellia oleifera	664293	C	CACAACA	C	CACAACA	INDEL	IGS(trnT-TGT,sdh4)
Camellia oleifera	664839	C	A	C	A	SNP	sdh4
Camellia oleifera	666382	TGTTAAG	T	TGTTAAG	T	INDEL	IGS(cox3,atp8)
Camellia oleifera	666739	T	C	T	C	SNP	atp8
Camellia oleifera	670396	TCGCTAA	T	TCGCTAA	T	INDEL	IGS(atp8,trnM-CAT-3)
Camellia oleifera	671863	G	GAGAGATC	G	GAGAGATC	INDEL	IGS(atp8,trnM-CAT-3)
Camellia oleifera	671888	G	T	G	T	SNP	IGS(atp8,trnM-CAT-3)
Camellia oleifera	673316	G	T	G	T	SNP	IGS(atp8,trnM-CAT-3)
Camellia oleifera	673783	TATCAC	T	TATCAC	T	INDEL	IGS(atp8,trnM-CAT-3)
Camellia oleifera	675263	G	GTTAGAA	G	GTTAGAA	INDEL	IGS(atp8,trnM-CAT-3)
Camellia oleifera	676290	GGTTGGTA	G	GGTTGGTA	G	INDEL	IGS(atp8,trnM-CAT-3)
Camellia oleifera	676870	G	GGTTAC	G	GGTTAC	INDEL	IGS(atp8,trnM-CAT-3)
Camellia oleifera	677139	C	T	C	T	SNP	IGS(atp8,trnM-CAT-3)
Camellia oleifera	677569	C	CTTTTAA	C	CTTTTAA	INDEL	IGS(atp8,trnM-CAT-3)
Camellia oleifera	677929	GGTTTT	G	GGTTTT	G	INDEL	IGS(atp8,trnM-CAT-3)
Camellia oleifera	678796	CGCAAA	C	CGCAAA	C	INDEL	IGS(atp8,trnM-CAT-3)
Camellia oleifera	679720	C	CAGTCCA	C	CAGTCCA	INDEL	IGS(atp8,trnM-CAT-3)
Camellia oleifera	680296	TTTTTA	T	TTTTTA	T	INDEL	IGS(atp8,trnM-CAT-3)
Camellia oleifera	683177	GTGGGAC	G	GTGGGAC	G	INDEL	IGS(trnM-CAT-3,cob)
Camellia oleifera	683472	C	CATCCAA	C	CATCCAA	INDEL	IGS(trnM-CAT-3,cob)
Camellia oleifera	684397	A	AACTAT	A	AACTAT	INDEL	IGS(trnM-CAT-3,cob)
Camellia oleifera	685503	C	CATACA	C	CATACA	INDEL	IGS(trnM-CAT-3,cob)
Camellia oleifera	685564	CTTGGT	C	CTTGGT	C	INDEL	IGS(trnM-CAT-3,cob)
Camellia oleifera	686722	C	CCAGTGAT	C	CCAGTGAT	INDEL	IGS(trnM-CAT-3,cob)
Camellia oleifera	688432	A	C	A	C	SNP	IGS(trnM-CAT-3,cob)
Camellia oleifera	688482	G	T	G	T	SNP	IGS(trnM-CAT-3,cob)
Camellia oleifera	688542	A	T	A	T	SNP	IGS(trnM-CAT-3,cob)
Camellia oleifera	688543	C	G	C	G	SNP	IGS(trnM-CAT-3,cob)
Camellia oleifera	688544	A	C	A	C	SNP	IGS(trnM-CAT-3,cob)
Camellia oleifera	688548	A	T	A	T	SNP	IGS(trnM-CAT-3,cob)
Camellia oleifera	688553	T	C	T	C	SNP	IGS(trnM-CAT-3,cob)
Camellia oleifera	688570	T	A	T	A	SNP	IGS(trnM-CAT-3,cob)
Camellia oleifera	690476	GC	G	GC	G	INDEL	IGS(cob,rps14)
Camellia oleifera	691051	A	C	A	C	SNP	IGS(cob,rps14)
Camellia oleifera	692915	A	C	A	C	SNP	IGS(rpl5,nad1)
Camellia oleifera	697066	C	A	C	A	SNP	rps13
Camellia oleifera	697303	T	G	T	G	SNP	IGS(rps13,nad5)
Camellia oleifera	698389	TA	T	TA	T	INDEL	IGS(rps13,nad5)
Camellia oleifera	699763	G	GGGATT	G	GGGATT	INDEL	IGS(rps13,nad5)
Camellia oleifera	700671	G	T	G	T	SNP	IGS(rps13,nad5)
Camellia oleifera	700672	A	T	A	T	SNP	IGS(rps13,nad5)
Camellia oleifera	700673	C	A	C	A	SNP	IGS(rps13,nad5)
Camellia oleifera	702901	C	A	C	A	SNP	IGS(rps13,nad5)
Camellia oleifera	703251	C	CTTGTA	C	CTTGTA	INDEL	IGS(rps13,nad5)
Camellia oleifera	703740	C	A	C	A	SNP	IGS(rps13,nad5)
Camellia oleifera	706628	T	G	T	G	SNP	nad5-intron2
Camellia oleifera	706629	T	A	T	A	SNP	nad5-intron2
Camellia oleifera	706630	A	C	A	C	SNP	nad5-intron2
Camellia oleifera	710524	C	A	C	A	SNP	IGS(nad5,trnM-CAT-4)
Camellia oleifera	710655	ACCTAGGTTC	A	ACCTAGGTTC	A	INDEL	IGS(trnM-CAT-4,rrn26)
Camellia oleifera	713144	A	G	A	G	SNP	rrn26
Camellia oleifera	714259	C	CAATCCA	C	CAATCCA	INDEL	rrn26
Camellia oleifera	714656	A	ACAAAC	A	ACAAAC	INDEL	IGS(rrn26,nad4L)
Camellia oleifera	714927	G	A	G	A	SNP	IGS(rrn26,nad4L)
Camellia oleifera	715853	G	A	G	A	SNP	IGS(rrn26,nad4L)
Camellia oleifera	716689	T	G	T	G	SNP	IGS(rrn26,nad4L)
Camellia oleifera	716762	G	A	G	A	SNP	IGS(rrn26,nad4L)
Camellia oleifera	716915	C	T	C	T	SNP	IGS(rrn26,nad4L)
Camellia oleifera	716932	G	A	G	A	SNP	IGS(rrn26,nad4L)
Camellia oleifera	717020	GGAGCCC	G	GGAGCCC	G	INDEL	IGS(rrn26,nad4L)
Camellia oleifera	717335	G	A	G	A	SNP	IGS(rrn26,nad4L)
Camellia oleifera	717378	G	A	G	A	SNP	IGS(rrn26,nad4L)
Camellia oleifera	717447	G	A	G	A	SNP	IGS(rrn26,nad4L)
Camellia oleifera	717557	A	G	A	G	SNP	IGS(rrn26,nad4L)
Camellia oleifera	717590	G	A	G	A	SNP	IGS(rrn26,nad4L)
Camellia oleifera	717646	CT	C	CT	C	INDEL	IGS(rrn26,nad4L)
Camellia oleifera	717941	G	A	G	A	SNP	IGS(rrn26,nad4L)
Camellia oleifera	718067	T	C	T	C	SNP	IGS(rrn26,nad4L)
Camellia oleifera	718204	GC	G	GC	G	INDEL	IGS(rrn26,nad4L)
Camellia oleifera	718480	G	A	G	A	SNP	IGS(rrn26,nad4L)
Camellia oleifera	718484	G	A	G	A	SNP	IGS(rrn26,nad4L)
Camellia oleifera	718492	GT	G	GT	G	INDEL	IGS(rrn26,nad4L)
Camellia oleifera	718610	A	C	A	C	SNP	IGS(rrn26,nad4L)
Camellia oleifera	718642	C	T	C	T	SNP	IGS(rrn26,nad4L)
Camellia oleifera	718746	C	T	C	T	SNP	IGS(rrn26,nad4L)
Camellia oleifera	718755	G	A	G	A	SNP	IGS(rrn26,nad4L)
Camellia oleifera	718912	C	G	C	G	SNP	IGS(rrn26,nad4L)
Camellia oleifera	718920	G	T	G	T	SNP	IGS(rrn26,nad4L)
Camellia oleifera	718945	A	T	A	T	SNP	IGS(rrn26,nad4L)
Camellia oleifera	719025	A	G	A	G	SNP	IGS(rrn26,nad4L)
Camellia oleifera	719150	G	A	G	A	SNP	IGS(rrn26,nad4L)
Camellia oleifera	719220	G	A	G	A	SNP	IGS(rrn26,nad4L)
Camellia oleifera	719344	C	T	C	T	SNP	IGS(rrn26,nad4L)
Camellia oleifera	719483	G	A	G	A	SNP	IGS(rrn26,nad4L)
Camellia oleifera	719734	TC	T	TC	T	INDEL	IGS(rrn26,nad4L)
Camellia oleifera	720193	C	G	C	G	SNP	IGS(rrn26,nad4L)
Camellia oleifera	720215	C	T	C	T	SNP	IGS(rrn26,nad4L)
Camellia oleifera	720297	A	T	A	T	SNP	IGS(rrn26,nad4L)
Camellia oleifera	720480	A	C	A	C	SNP	IGS(rrn26,nad4L)
Camellia oleifera	722165	C	G	C	G	SNP	IGS(rrn26,nad4L)
Camellia oleifera	725202	T	G	T	G	SNP	IGS(rrn26,nad4L)
Camellia oleifera	725383	A	C	A	C	SNP	IGS(rrn26,nad4L)
Camellia oleifera	725439	C	T	C	T	SNP	IGS(rrn26,nad4L)
Camellia oleifera	725440	A	T	A	T	SNP	IGS(rrn26,nad4L)
Camellia oleifera	725443	T	G	T	G	SNP	IGS(rrn26,nad4L)
Camellia oleifera	725478	C	T	C	T	SNP	IGS(rrn26,nad4L)
Camellia oleifera	729156	G	T	G	T	SNP	IGS(atp4,ccmC)
Camellia oleifera	733465	CATGCAAATA	C	CATGCAAATA	C	INDEL	IGS(trnM-CAT-5,ccmFn)
Camellia oleifera	735111	CCTTTAA	C	CCTTTAA	C	INDEL	IGS(trnM-CAT-5,ccmFn)
Camellia oleifera	742154	A	AACTAC	A	AACTAC	INDEL	IGS(trnM-CAT-5,ccmFn)
Camellia oleifera	742418	A	C	A	C	SNP	IGS(trnM-CAT-5,ccmFn)
Camellia oleifera	744822	AAAAAAC	A	AAAAAAC	A	INDEL	IGS(trnM-CAT-5,ccmFn)
Camellia oleifera	753229	C	A	C	A	SNP	IGS(ccmFn,trnI-GAT)
Camellia oleifera	754506	G	GATTACA	G	GATTACA	INDEL	IGS(ccmFn,trnI-GAT)
Camellia oleifera	754871	T	TCGATA	T	TCGATA	INDEL	IGS(ccmFn,trnI-GAT)
Camellia oleifera	755000	GGTTAA	G	GGTTAA	G	INDEL	IGS(ccmFn,trnI-GAT)
Camellia oleifera	755354	T	G	T	G	SNP	IGS(ccmFn,trnI-GAT)
Camellia oleifera	756370	CCAAAA	C	CCAAAA	C	INDEL	IGS(ccmFn,trnI-GAT)
Camellia oleifera	757939	A	AGGTTT	A	AGGTTT	INDEL	IGS(ccmFn,trnI-GAT)
Camellia oleifera	763974	TGTTTC	T	TGTTTC	T	INDEL	IGS(trnI-GAT,trnV-GAC)
Camellia oleifera	764877	G	T	G	T	SNP	IGS(trnI-GAT,trnV-GAC)
Camellia oleifera	765495	T	A	T	A	SNP	IGS(trnI-GAT,trnV-GAC)
Camellia oleifera	765501	T	A	T	A	SNP	IGS(trnI-GAT,trnV-GAC)
Camellia oleifera	765828	T	A	T	A	SNP	IGS(trnI-GAT,trnV-GAC)
Camellia oleifera	765829	C	A	C	A	SNP	IGS(trnI-GAT,trnV-GAC)
Camellia oleifera	766568	A	C	A	C	SNP	IGS(trnI-GAT,trnV-GAC)
Camellia oleifera	767647	T	A	T	A	SNP	IGS(trnI-GAT,trnV-GAC)
Camellia oleifera	767648	T	A	T	A	SNP	IGS(trnI-GAT,trnV-GAC)
Camellia oleifera	768504	AGTTAAT	A	AGTTAAT	A	INDEL	IGS(trnI-GAT,trnV-GAC)
Camellia oleifera	768554	G	A	G	A	SNP	IGS(trnI-GAT,trnV-GAC)
Camellia oleifera	769792	GGTATCT	G	GGTATCT	G	INDEL	IGS(trnV-GAC,trnI-GAT-2)
Camellia oleifera	770566	GCGATC	G	GCGATC	G	INDEL	IGS(trnV-GAC,trnI-GAT-2)
Camellia oleifera	771046	GC	G	GC	G	INDEL	IGS(trnV-GAC,trnI-GAT-2)
Camellia oleifera	771073	GA	G	GA	G	INDEL	IGS(trnV-GAC,trnI-GAT-2)
Camellia oleifera	771415	CG	C	CG	C	INDEL	IGS(trnI-GAT-2,trnA-TGC)
Camellia oleifera	771617	CT	C	CT	C	INDEL	IGS(trnI-GAT-2,trnA-TGC)
Camellia oleifera	773007	CG	C	CG	C	INDEL	IGS(trnA-TGC,nad1)
Camellia oleifera	773135	C	T	C	T	SNP	IGS(trnA-TGC,nad1)
Camellia oleifera	774870	CAGGAAAA	C	CAGGAAAA	C	INDEL	IGS(trnA-TGC,nad1)
Camellia oleifera	775431	CG	C	CG	C	INDEL	IGS(trnA-TGC,nad1)
Camellia oleifera	776937	C	A	C	A	SNP	IGS(trnA-TGC,nad1)
Camellia oleifera	777591	TCTTGAA	T	TCTTGAA	T	INDEL	IGS(trnA-TGC,nad1)
Camellia oleifera	778471	C	CTTTTGA	C	CTTTTGA	INDEL	IGS(trnA-TGC,nad1)
Camellia oleifera	778708	C	A	C	A	SNP	IGS(trnA-TGC,nad1)
Camellia oleifera	780860	G	GTTATA	G	GTTATA	INDEL	IGS(trnA-TGC,nad1)
Camellia oleifera	782235	G	GGTAAC	G	GGTAAC	INDEL	IGS(trnA-TGC,nad1)
Camellia oleifera	784155	C	A	C	A	SNP	IGS(trnA-TGC,nad1)
Camellia oleifera	786221	TA	T	TA	T	INDEL	IGS(trnA-TGC,nad1)
Camellia oleifera	788468	C	CGGCAAG	C	CGGCAAG	INDEL	nad1-intron2,matR
Camellia oleifera	790393	TA	T	TA	T	INDEL	IGS(nad1,trnN-ATT)
Camellia oleifera	791207	TTTTAAA	T	TTTTAAA	T	INDEL	IGS(nad1,trnN-ATT)
Camellia oleifera	792098	A	C	A	C	SNP	IGS(nad1,trnN-ATT)
Camellia oleifera	793163	T	TTTTATTTTAAG	T	TTTTATTTTAAG	INDEL	IGS(nad1,trnN-ATT)
Camellia oleifera	793802	G	GGTTTA	G	GGTTTA	INDEL	IGS(nad1,trnN-ATT)
Camellia oleifera	794584	T	G	T	G	SNP	IGS(nad1,trnN-ATT)
Camellia oleifera	794668	C	T	C	T	SNP	IGS(nad1,trnN-ATT)
Camellia oleifera	795740	T	G	T	G	SNP	IGS(nad1,trnN-ATT)
Camellia oleifera	796052	G	GAAGGAAA	G	GAAGGAAA	INDEL	IGS(nad1,trnN-ATT)
Camellia oleifera	796256	A	C	A	C	SNP	IGS(nad1,trnN-ATT)
Camellia oleifera	796579	G	A	G	A	SNP	IGS(nad1,trnN-ATT)
Camellia oleifera	796716	CGGTTT	C	CGGTTT	C	INDEL	IGS(nad1,trnN-ATT)
Camellia oleifera	797375	T	G	T	G	SNP	IGS(nad1,trnN-ATT)
Camellia oleifera	798016	AGTATT	A	AGTATT	A	INDEL	IGS(nad1,trnN-ATT)
Camellia oleifera	799135	GT	G	GT	G	INDEL	IGS(nad1,trnN-ATT)
Camellia oleifera	799590	GTGAAAA	G	GTGAAAA	G	INDEL	IGS(nad1,trnN-ATT)
Camellia oleifera	799729	G	T	G	T	SNP	IGS(nad1,trnN-ATT)
Camellia oleifera	800025	GCTAGAT	G	GCTAGAT	G	INDEL	IGS(nad1,trnN-ATT)
Camellia oleifera	800338	C	CTTAAAA	C	CTTAAAA	INDEL	IGS(nad1,trnN-ATT)
Camellia oleifera	802463	T	TGCCAC	T	TGCCAC	INDEL	IGS(nad1,trnN-ATT)
Camellia oleifera	803325	AACACT	A	AACACT	A	INDEL	IGS(trnN-ATT,rps19)
Camellia oleifera	803485	G	GGTAAC	G	GGTAAC	INDEL	IGS(trnN-ATT,rps19)
Camellia oleifera	803808	CGTTTT	C	CGTTTT	C	INDEL	IGS(trnN-ATT,rps19)
Camellia oleifera	804186	G	GA	G	GA	INDEL	IGS(trnN-ATT,rps19)
Camellia oleifera	805329	TATTTA	T	TATTTA	T	INDEL	IGS(trnN-ATT,rps19)
Camellia oleifera	805493	CTAATT	C	CTAATT	C	INDEL	IGS(trnN-ATT,rps19)
Camellia oleifera	805834	GGTAATT	G	GGTAATT	G	INDEL	IGS(trnN-ATT,rps19)
Camellia oleifera	807931	G	GGAAAC	G	GGAAAC	INDEL	IGS(trnN-ATT,rps19)
Camellia oleifera	808243	GCATAA	G	GCATAA	G	INDEL	IGS(trnN-ATT,rps19)
Camellia oleifera	811043	T	G	T	G	SNP	IGS(trnN-ATT,rps19)
Camellia oleifera	811728	GAACCA	G	GAACCA	G	INDEL	IGS(trnN-ATT,rps19)
Camellia oleifera	812476	G	T	G	T	SNP	IGS(trnN-ATT,rps19)
Camellia oleifera	812765	A	ATAAAG	A	ATAAAG	INDEL	IGS(trnN-ATT,rps19)
Camellia oleifera	814399	A	G	A	G	SNP	IGS(trnN-ATT,rps19)
Camellia oleifera	814404	G	T	G	T	SNP	IGS(trnN-ATT,rps19)
Camellia oleifera	817023	G	T	G	T	SNP	IGS(rps19,trnE-TTC)
Camellia oleifera	818246	A	C	A	C	SNP	IGS(rps19,trnE-TTC)
Camellia oleifera	818477	C	A	C	A	SNP	IGS(rps19,trnE-TTC)
Camellia oleifera	820588	GGCCTTT	G	GGCCTTT	G	INDEL	IGS(rps19,trnE-TTC)
Camellia oleifera	820879	GATATA	G	GATATA	G	INDEL	IGS(rps19,trnE-TTC)
Camellia oleifera	821467	G	T	G	T	SNP	IGS(rps19,trnE-TTC)
Camellia oleifera	826994	G	T	G	T	SNP	IGS(rps19,trnE-TTC)
Camellia oleifera	826995	A	C	A	C	SNP	IGS(rps19,trnE-TTC)
Camellia oleifera	829600	A	C	A	C	SNP	IGS(rps19,trnE-TTC)
Camellia oleifera	832742	T	TATTTG	T	TATTTG	INDEL	IGS(trnE-TTC,trnH-GTG)
Camellia oleifera	832979	A	C	A	C	SNP	IGS(trnE-TTC,trnH-GTG)
Camellia oleifera	834293	TTGAGAAA	T	TTGAGAAA	T	INDEL	IGS(trnE-TTC,trnH-GTG)
Camellia oleifera	834567	CAAAGCT	C	CAAAGCT	C	INDEL	IGS(trnE-TTC,trnH-GTG)
Camellia oleifera	835495	CTAAAAG	C	CTAAAAG	C	INDEL	IGS(trnH-GTG,trnS-CGA)
Camellia oleifera	835676	TTTTTC	T	TTTTTC	T	INDEL	IGS(trnH-GTG,trnS-CGA)
Camellia oleifera	835823	AAGTAC	A	AAGTAC	A	INDEL	IGS(trnH-GTG,trnS-CGA)
Camellia oleifera	836872	G	GATACC	G	GATACC	INDEL	IGS(trnH-GTG,trnS-CGA)
Camellia oleifera	837398	T	G	T	G	SNP	IGS(trnH-GTG,trnS-CGA)
Camellia oleifera	838612	A	C	A	C	SNP	IGS(trnH-GTG,trnS-CGA)
Camellia oleifera	839228	A	AACACAC	A	AACACAC	INDEL	IGS(trnH-GTG,trnS-CGA)
Camellia oleifera	840443	A	AC	AC	AC	INDEL	IGS(trnH-GTG,trnS-CGA)
Camellia oleifera	840862	G	GTAAGAAA	G	GTAAGAAA	INDEL	IGS(trnH-GTG,trnS-CGA)
Camellia oleifera	841126	A	ACAAACC	A	ACAAACC	INDEL	IGS(trnH-GTG,trnS-CGA)
Camellia oleifera	841650	G	T	G	T	SNP	IGS(trnH-GTG,trnS-CGA)
Camellia oleifera	851360	AAAAC	A	AAAAC	A	INDEL	IGS(nad5,ccmFc)
Camellia oleifera	855937	AAAATC	A	AAAATC	A	INDEL	IGS(nad5,ccmFc)
Camellia oleifera	856222	G	T	G	T	SNP	IGS(nad5,ccmFc)
Camellia oleifera	856931	G	GATCATA	G	GATCATA	INDEL	IGS(nad5,ccmFc)
Camellia oleifera	876145	C	CTGTAGT	C	CTGTAGT	INDEL	IGS(nad5,ccmFc)
Camellia oleifera	876636	CAATCCA	C	CAATCCA	C	INDEL	IGS(nad5,ccmFc)
Camellia oleifera	878834	A	C	A	C	SNP	IGS(nad5,ccmFc)
Camellia oleifera	879050	GGTGTTA	G	GGTGTTA	G	INDEL	IGS(nad5,ccmFc)
Camellia oleifera	880628	A	AGTTTG	A	AGTTTG	INDEL	IGS(nad5,ccmFc)
Camellia oleifera	883566	T	G	T	G	SNP	IGS(nad5,ccmFc)
Camellia oleifera	885198	G	T	G	T	SNP	IGS(nad5,ccmFc)
Camellia oleifera	888930	T	C	T	C	SNP	IGS(nad5,ccmFc)
Camellia oleifera	889339	CTAAAG	C	CTAAAG	C	INDEL	IGS(nad5,ccmFc)
Camellia oleifera	889661	C	A	C	A	SNP	IGS(nad5,ccmFc)
Camellia oleifera	891519	T	C	T	C	SNP	IGS(nad5,ccmFc)
Camellia oleifera	893654	CGCGACT	C	CGCGACT	C	INDEL	IGS(nad5,ccmFc)
Camellia oleifera	893937	C	A	C	A	SNP	IGS(nad5,ccmFc)
Camellia oleifera	897604	T	TATAATA	T	TATAATA	INDEL	IGS(ccmFc,trnM-CAT-6)
Camellia oleifera	902049	T	TCAAAC	T	TCAAAC	INDEL	IGS(ccmFc,trnM-CAT-6)
Camellia oleifera	902149	A	T	A	T	SNP	IGS(ccmFc,trnM-CAT-6)
Camellia oleifera	908288	T	G	T	G	SNP	IGS(ccmFc,trnM-CAT-6)
Camellia oleifera	908642	T	TTTTAA	T	TTTTAA	INDEL	IGS(ccmFc,trnM-CAT-6)
Camellia oleifera	909436	A	C	A	C	SNP	IGS(ccmFc,trnM-CAT-6)
Camellia oleifera	909968	AACAC	A	AACAC	A	INDEL	IGS(ccmFc,trnM-CAT-6)
Camellia oleifera	911244	C	G	C	G	SNP	trnM-CAT-6
Camellia oleifera	912476	C	A	C	A	SNP	IGS(trnM-CAT-6,trnC-GCA-2)
Camellia oleifera	915456	A	C	A	C	SNP	IGS(trnM-CAT-6,trnC-GCA-2)
Camellia oleifera	915746	A	C	A	C	SNP	IGS(trnM-CAT-6,trnC-GCA-2)
Camellia oleifera	917791	A	AATGGTT	A	AATGGTT	INDEL	IGS(trnM-CAT-6,trnC-GCA-2)
Camellia oleifera	919721	G	T	G	T	SNP	IGS(trnM-CAT-6,trnC-GCA-2)
Camellia oleifera	919727	A	C	A	C	SNP	IGS(trnM-CAT-6,trnC-GCA-2)
Camellia oleifera	921681	GGTTTTT	G	GGTTTTT	G	INDEL	IGS(trnC-GCA-2,trnQ-TTG)
Camellia oleifera	922310	T	C	T	C	SNP	IGS(trnC-GCA-2,trnQ-TTG)
Camellia oleifera	924987	A	T	A	T	SNP	IGS(trnC-GCA-2,trnQ-TTG)
Camellia oleifera	925561	A	C	A	C	SNP	IGS(trnC-GCA-2,trnQ-TTG)
Camellia oleifera	927325	G	T	G	T	SNP	IGS(trnC-GCA-2,trnQ-TTG)
Camellia oleifera	930275	TTTTTG	T	TTTTTG	T	INDEL	IGS(trnC-GCA-2,trnQ-TTG)
Camellia oleifera	931879	T	A	T	A	SNP	IGS(trnC-GCA-2,trnQ-TTG)
Camellia oleifera	933611	A	T	A	T	SNP	IGS(trnC-GCA-2,trnQ-TTG)
Camellia oleifera	933612	A	T	A	T	SNP	IGS(trnC-GCA-2,trnQ-TTG)
Camellia oleifera	935206	CTGTAAT	C	CTGTAAT	C	INDEL	IGS(trnC-GCA-2,trnQ-TTG)
Camellia oleifera	936497	GATTGAT	G	GATTGAT	G	INDEL	IGS(trnC-GCA-2,trnQ-TTG)
Camellia oleifera	938777	G	GGTTGGATA	G	GGTTGGATA	INDEL	IGS(trnQ-TTG,trnG-GCC)
Camellia oleifera	939715	TCCAGTTTGAA	T	TCCAGTTTGAA	T	INDEL	IGS(trnQ-TTG,trnG-GCC)
Camellia oleifera	939964	A	C	A	C	SNP	IGS(trnQ-TTG,trnG-GCC)
Camellia oleifera	941337	GTACTA	G	GTACTA	G	INDEL	IGS(trnG-GCC,trnW-CCA)
Camellia oleifera	942826	AATTAG	A	AATTAG	A	INDEL	IGS(trnG-GCC,trnW-CCA)
Camellia oleifera	942948	AGTGAT	A	AGTGAT	A	INDEL	IGS(trnG-GCC,trnW-CCA)
Camellia oleifera	943177	T	TTTAAA	T	TTTAAA	INDEL	IGS(trnG-GCC,trnW-CCA)
Camellia oleifera	943397	ATTGGT	A	ATTGGT	A	INDEL	IGS(trnG-GCC,trnW-CCA)
Camellia oleifera	945974	C	CATCAAT	C	CATCAAT	INDEL	IGS(trnG-GCC,trnW-CCA)
Camellia oleifera	948947	TTAAAA	T	TTAAAA	T	INDEL	IGS(trnG-GCC,trnW-CCA)
Camellia oleifera	949276	GCTTAA	G	GCTTAA	G	INDEL	IGS(trnG-GCC,trnW-CCA)
Camellia oleifera	950590	G	T	G	T	SNP	IGS(trnG-GCC,trnW-CCA)
Camellia oleifera	950687	A	AATGGAATTC	A	AATGGAATTC	INDEL	IGS(trnG-GCC,trnW-CCA)
Camellia oleifera	950735	A	C	C	C	SNP	IGS(trnG-GCC,trnW-CCA)
Camellia oleifera	950736	C	T	T	T	SNP	IGS(trnG-GCC,trnW-CCA)
Camellia oleifera	950741	T	G	G	G	SNP	IGS(trnG-GCC,trnW-CCA)
Camellia oleifera	950745	C	A	A	A	SNP	IGS(trnG-GCC,trnW-CCA)
Camellia oleifera	950749	G	A	A	A	SNP	IGS(trnG-GCC,trnW-CCA)
Camellia oleifera	950761	A	G	G	G	SNP	IGS(trnG-GCC,trnW-CCA)
Camellia oleifera	950774	G	C	C	C	SNP	IGS(trnG-GCC,trnW-CCA)
Camellia oleifera	951182	G	A		A	SNP	IGS(trnG-GCC,trnW-CCA)
Camellia oleifera	951202	C	T		T	SNP	IGS(trnG-GCC,trnW-CCA)
Camellia oleifera	951203	A	G		G	SNP	IGS(trnG-GCC,trnW-CCA)
Camellia oleifera	951209	A	G		G	SNP	IGS(trnG-GCC,trnW-CCA)
Camellia oleifera	951215	A	G		G	SNP	IGS(trnG-GCC,trnW-CCA)
Camellia oleifera	951218	T	C		C	SNP	IGS(trnG-GCC,trnW-CCA)
Camellia oleifera	951222	A	G	G	G	SNP	IGS(trnG-GCC,trnW-CCA)
Camellia oleifera	951436	G	T		T	SNP	IGS(trnG-GCC,trnW-CCA)
Camellia oleifera	951437	C	T		T	SNP	IGS(trnG-GCC,trnW-CCA)
Camellia oleifera	951440	A	T		T	SNP	IGS(trnG-GCC,trnW-CCA)
Camellia oleifera	951443	T	C		C	SNP	IGS(trnG-GCC,trnW-CCA)
Camellia oleifera	951444	C	T		T	SNP	IGS(trnG-GCC,trnW-CCA)
Camellia oleifera	951453	A	C		C	SNP	IGS(trnG-GCC,trnW-CCA)
Camellia oleifera	951491	C	A	A	A	SNP	IGS(trnG-GCC,trnW-CCA)
Camellia oleifera	951496	G	A	A	A	SNP	IGS(trnG-GCC,trnW-CCA)
Camellia oleifera	951513	T	C	C	C	SNP	IGS(trnG-GCC,trnW-CCA)
Camellia oleifera	951515	G	C	C	C	SNP	IGS(trnG-GCC,trnW-CCA)
Camellia oleifera	951526	C	T	T	T	SNP	IGS(trnG-GCC,trnW-CCA)
Camellia oleifera	951559	T	C	C	C	SNP	IGS(trnG-GCC,trnW-CCA)
Camellia oleifera	951564	A	G	G	G	SNP	IGS(trnG-GCC,trnW-CCA)
Camellia oleifera	951572	T	C	C	C	SNP	IGS(trnG-GCC,trnW-CCA)
Camellia oleifera	951575	T	C	C	C	SNP	IGS(trnG-GCC,trnW-CCA)
Camellia oleifera	951581	C	G	G	G	SNP	IGS(trnG-GCC,trnW-CCA)
Camellia oleifera	951583	T	C	C	C	SNP	IGS(trnG-GCC,trnW-CCA)
Camellia oleifera	951622	T	C	C	C	SNP	IGS(trnG-GCC,trnW-CCA)
Camellia oleifera	951666	G	T	G	T	SNP	IGS(trnG-GCC,trnW-CCA)
Camellia oleifera	951675	A	C	C	C	SNP	IGS(trnG-GCC,trnW-CCA)
Camellia oleifera	951680	G	A	A	A	SNP	IGS(trnG-GCC,trnW-CCA)
Camellia oleifera	951686	T	C	C	C	SNP	IGS(trnG-GCC,trnW-CCA)
Camellia oleifera	951687	G	A	A	A	SNP	IGS(trnG-GCC,trnW-CCA)
Camellia oleifera	951688	T	G	G	G	SNP	IGS(trnG-GCC,trnW-CCA)
Camellia oleifera	951689	A	G	G	G	SNP	IGS(trnG-GCC,trnW-CCA)
Camellia oleifera	951702	A	C	C	C	SNP	IGS(trnG-GCC,trnW-CCA)
Camellia oleifera	951706	A	C	C	C	SNP	IGS(trnG-GCC,trnW-CCA)
Camellia oleifera	951707	T	C	C	C	SNP	IGS(trnG-GCC,trnW-CCA)
Camellia oleifera	951710	T	C	C	C	SNP	IGS(trnG-GCC,trnW-CCA)
Camellia oleifera	951741	T	C	C	C	SNP	IGS(trnG-GCC,trnW-CCA)
Camellia oleifera	951747	A	G	G	G	SNP	IGS(trnG-GCC,trnW-CCA)
Camellia oleifera	951756	T	G	G	G	SNP	IGS(trnG-GCC,trnW-CCA)
Camellia oleifera	951757	A	T	T	T	SNP	IGS(trnG-GCC,trnW-CCA)
Camellia oleifera	951758	A	T	T	T	SNP	IGS(trnG-GCC,trnW-CCA)
Camellia oleifera	951767	T	G	G	G	SNP	IGS(trnG-GCC,trnW-CCA)
Camellia oleifera	951803	T	C	C	C	SNP	IGS(trnG-GCC,trnW-CCA)
Camellia oleifera	951842	C	T	T	T	SNP	IGS(trnG-GCC,trnW-CCA)
Camellia oleifera	951899	T	C	C	C	SNP	IGS(trnG-GCC,trnW-CCA)
Camellia oleifera	951932	C	T		T	SNP	IGS(trnG-GCC,trnW-CCA)
Camellia oleifera	951934	C	T		T	SNP	IGS(trnG-GCC,trnW-CCA)
Camellia oleifera	951936	T	C		C	SNP	IGS(trnG-GCC,trnW-CCA)
Camellia oleifera	951942	G	A		A	SNP	IGS(trnG-GCC,trnW-CCA)
Camellia oleifera	951943	A	C		C	SNP	IGS(trnG-GCC,trnW-CCA)
Camellia oleifera	951968	A	G	G	G	SNP	IGS(trnG-GCC,trnW-CCA)
Camellia oleifera	951977	C	A	A	A	SNP	IGS(trnG-GCC,trnW-CCA)
Camellia oleifera	951983	C	A		A	SNP	IGS(trnG-GCC,trnW-CCA)
Camellia oleifera	951986	A	G		G	SNP	IGS(trnG-GCC,trnW-CCA)
Camellia oleifera	952002	A	G	G	G	SNP	IGS(trnG-GCC,trnW-CCA)
Camellia oleifera	952008	C	T	T	T	SNP	IGS(trnG-GCC,trnW-CCA)
Camellia oleifera	952010	T	A	A	A	SNP	IGS(trnG-GCC,trnW-CCA)
Camellia oleifera	952016	G	T	T	T	SNP	IGS(trnG-GCC,trnW-CCA)
Camellia oleifera	952018	C	G	G	G	SNP	IGS(trnG-GCC,trnW-CCA)
Camellia oleifera	952019	G	T	T	T	SNP	IGS(trnG-GCC,trnW-CCA)
Camellia oleifera	952024	C	A	A	A	SNP	IGS(trnG-GCC,trnW-CCA)
Camellia oleifera	952027	T	C	C	C	SNP	IGS(trnG-GCC,trnW-CCA)
Camellia oleifera	952031	C	A	A	A	SNP	IGS(trnG-GCC,trnW-CCA)
Camellia oleifera	952038	G	C	C	C	SNP	IGS(trnG-GCC,trnW-CCA)
Camellia oleifera	952305	TTTTTTA	T	TTTTTTA	T	INDEL	trnP-TGG-2
Camellia oleifera	953028	G	T	G	T	SNP	IGS(trnP-TGG-2,nad9)

## Sheet: Table S10
Table S10 The details in primers
Primer_ID	FPr1(5'-3')	Tm	Size	RPr1(5'-3')	Tm	Size	PSize	Start	End	FPr2(5'-3')	Tm	Size	RPr2(5'-3')	Tm	Size	PSize	Start	End	FPr3(5'-3')	Tm	Size	RPr3(5'-3')	Tm	Size	PSize	Start	End
PT-995-1000	CCAGCCCTTTGTCATCCTTA	60.066	20	AAGCCATCTGAACTCGTGCT	60.02	20	196	878	1073	CCAGCCCTTTGTCATCCTTA	60.066	20	CGTCCCCAGCGATCTATTTA	60.053	20	259	878	1136	GGGAGTCTTCTCCCATTTCC	59.874	20	ATTCTTAGGCGGACCAACCT	59.962	20	257	971	1227
PT-1094-1094	CATGCAGAATCAGCACGAGT	60.016	20	ATTCTTAGGCGGACCAACCT	59.962	20	185	1043	1227	AGCACGAGTTCAGATGGCTT	60.02	20	ATTCTTAGGCGGACCAACCT	59.962	20	174	1054	1227	CATGCAGAATCAGCACGAGT	60.016	20	TCATTCTTAGGCGGACCAAC	60.074	20	187	1043	1229
PT-1241-1247	AGGTTGGTCCGCCTAAGAAT	59.962	20	GTGTAGGTCGGGGTTGAGAA	59.966	20	152	1208	1359	TAAATAGATCGCTGGGGACG	60.053	20	GTGTAGGTCGGGGTTGAGAA	59.966	20	243	1117	1359	GTTGGTCCGCCTAAGAATGA	60.074	20	GTGTAGGTCGGGGTTGAGAA	59.966	20	150	1210	1359
PT-1747-1747	ACGACAAATCCCAACTACGG	59.853	20	TGTGGTTGCACATTTCCATT	59.823	20	286	1609	1894	AAACTGCTAAGGGCATTCCA	59.708	20	TTCTATGGGAGCCGTTTTTG	60.067	20	225	1643	1867	TGCATAGGAAAGAAGGTCGG	60.206	20	TGTGGTTGCACATTTCCATT	59.823	20	171	1724	1894
PT-3180-3180	ATTCCAATACCGACAGCAGC	60.103	20	AAGAGAGAGCGTCACCCAAA	59.989	20	278	3127	3404	ATTCCAATACCGACAGCAGC	60.103	20	ATGGGGAAGGAAGAGAGAGC	59.778	20	288	3127	3414	ATTCCAATACCGACAGCAGC	60.103	20	TTTCTAACGGAGTTCCGCAC	60.249	20	224	3127	3350
PT-5055-5055	TGGCATGAGCTTGTGAAGTC	59.992	20	TTCCCAGCGAGAAAGAGAAA	60.066	20	244	5010	5253	TGGCATGAGCTTGTGAAGTC	59.992	20	TTTCCCAGCGAGAAAGAGAA	60.066	20	245	5010	5254	TGGCATGAGCTTGTGAAGTC	59.992	20	TTTTCCCAGCGAGAAAGAGA	60.066	20	246	5010	5255
PT-6354-6361	AATCAAGCCTCATTGCAACC	60.081	20	AAAGAAGCGGATACGAGCAA	59.982	20	259	6185	6443	CGACGTCTAACAGTGGCAAA	59.904	20	AAAGAAGCGGATACGAGCAA	59.982	20	277	6167	6443	AATCAAGCCTCATTGCAACC	60.081	20	GCGCATATTCATCAAGCAAA	59.809	20	288	6185	6472
PT-6965-6970	AAGCGTATTTTGCAGCAACC	60.272	20	CAAGCATGCGCTTCTGATTA	60.118	20	297	6893	7189	GTTCTCGCCTTCACGTCTTC	59.997	20	GATCTTGAGATTGAGGCGCT	59.537	20	270	6828	7097	GTTCTCGCCTTCACGTCTTC	59.997	20	TCTTTGAAGATCTGGCCTCG	60.474	20	235	6828	7062
PT-15160-15196	TCTACCAGAGCCGGGACTAA	59.83	20	TTTCTGGGAGAGAATGCACC	60.195	20	255	15054	15308	TTCTACCAGAGCCGGGACTA	59.83	20	TTTCTGGGAGAGAATGCACC	60.195	20	256	15053	15308	AGGATGGGAAGAGGTTTGGT	59.795	20	TTTCTGGGAGAGAATGCACC	60.195	20	293	15016	15308
PT-17685-17690	GGAGGAGACCGGTAAAAAGG	59.934	20	AGCCTGCACCCATATCTTTG	60.096	20	181	17546	17726	GGAGGAGACCGGTAAAAAGG	59.934	20	TTTGAAGTTGCAAATCGACG	59.849	20	226	17546	17771	GCAGCTCATGGATTAGAGGG	59.797	20	AGCCTGCACCCATATCTTTG	60.096	20	210	17517	17726
PT-18607-18607	TGCTATCATCCTCTTCGCCT	59.939	20	TTTCACTCCCTCTCCCATTG	60.042	20	282	18540	18821	GCTATCATCCTCTTCGCCTG	59.939	20	TTTCACTCCCTCTCCCATTG	60.042	20	281	18541	18821	CTGCTATCATCCTCTTCGCC	59.939	20	TTTCACTCCCTCTCCCATTG	60.042	20	283	18539	18821
PT-19221-19221	AGGTTGAAGCTGAAGCCAAA	59.993	20	TGTATTCGGAAGGAGTTGCC	60.074	20	260	19198	19457	AAGGTTGAAGCTGAAGCCAA	59.993	20	TGTATTCGGAAGGAGTTGCC	60.074	20	261	19197	19457	ATTGATTACGGCTGCTCCAG	60.235	20	CCAATCACTTATGGTCGGCT	59.955	20	253	19081	19333
PT-19308-19314	AGGTTGAAGCTGAAGCCAAA	59.993	20	TGTATTCGGAAGGAGTTGCC	60.074	20	260	19198	19457	AAGGTTGAAGCTGAAGCCAA	59.993	20	TGTATTCGGAAGGAGTTGCC	60.074	20	261	19197	19457	AAGGTTGAAGCTGAAGCCAA	59.993	20	ATCCTTCCAAACTTGGGGTT	59.668	20	240	19197	19436
PT-19532-19532	CGTAGCTCCGATCCTGATTC	59.797	20	CCACCCAGTGAGCCATAACT	59.989	20	285	19500	19784	CGTAGCTCCGATCCTGATTC	59.797	20	AGACAGGTGGGCAAGCTCTA	60.012	20	262	19500	19761	CGTAGCTCCGATCCTGATTC	59.797	20	ACCACCCAGTGAGCCATAAC	59.851	20	286	19500	19785
PT-20284-20284	GCCGGACAGAGACTAGAACG	60.012	20	GGTCCCATTCGTCTACCCTT	60.19	20	281	20064	20344	ACTAATTCCCTCCGTTCGCT	60.096	20	AGGTCCCATTCGTCTACCCT	59.817	20	212	20134	20345	ACTAATTCCCTCCGTTCGCT	60.096	20	GGTCCCATTCGTCTACCCTT	60.19	20	211	20134	20344
PT-20404-20404	AGGGTAGACGAATGGGACCT	59.817	20	CTATGCCCTGCGGTAATGAT	59.945	20	283	20326	20608	AAGGGTAGACGAATGGGACC	60.19	20	CTATGCCCTGCGGTAATGAT	59.945	20	284	20325	20608	AGGGTAGACGAATGGGACCT	59.817	20	TCCTCTGGCATTACGACCTT	59.694	20	263	20326	20588
PT-20839-20847	ATTTTACATCCCAGAGGGGC	60.152	20	TCAATCACTTGCTGCCGTTA	60.401	20	235	20757	20991	ATTTTACATCCCAGAGGGGC	60.152	20	CAATCACTTGCTGCCGTTAC	59.347	20	234	20757	20990	TTTACATCCCAGAGGGGCTA	59.523	20	TCAATCACTTGCTGCCGTTA	60.401	20	233	20759	20991
PT-22051-22051	GGGTTATCCTGCACTTGGAA	59.933	20	TTTTCACCCCATTCACCTTC	59.767	20	242	21867	22108	ACTCCTTGGGGTTATCCTGC	60.328	20	TTTTCACCCCATTCACCTTC	59.767	20	250	21859	22108	GGGTTATCCTGCACTTGGAA	59.933	20	CCACCAAGTTGTATGTGCGT	59.49	20	270	21867	22136
PT-22272-22272	GAAGGTGAATGGGGTGAAAA	59.767	20	AGCCTGCCTGACTGTGCTAT	60.043	20	217	22089	22305	GAAGGTGAATGGGGTGAAAA	59.767	20	AGATTGTTCGGGAGACATGG	59.927	20	296	22089	22384	GAAGGTGAATGGGGTGAAAA	59.767	20	TTCTGCTCGTGAGCGTAATG	60.157	20	242	22089	22330
PT-22343-22343	ATAGCACAGTCAGGCAGGCT	60.043	20	GAGACGTGAAAACACCCGAT	59.973	20	166	22286	22451	ATAGCACAGTCAGGCAGGCT	60.043	20	GCACTACGGTGAGACGTGAA	59.905	20	176	22286	22461	GAAGGTGAATGGGGTGAAAA	59.767	20	AGATTGTTCGGGAGACATGG	59.927	20	296	22089	22384
PT-22602-22609	ATCGGGTGTTTTCACGTCTC	59.973	20	TGGGCTTGAATGCTTACCTT	59.708	20	208	22432	22639	GATCGGGTGTTTTCACGTCT	59.973	20	TGGGCTTGAATGCTTACCTT	59.708	20	209	22431	22639	CCATGTCTCCCGAACAATCT	59.927	20	TGGGCTTGAATGCTTACCTT	59.708	20	275	22365	22639
PT-22698-22698	AGCTAGCCCCCTATGTTGGT	59.983	20	AAAGGCCCTGCAATCTTTCT	60.208	20	286	22581	22866	AGCTAGCCCCCTATGTTGGT	59.983	20	AATCCGTTGCTTGTTGCTTT	59.752	20	215	22581	22795	AGCTAGCCCCCTATGTTGGT	59.983	20	ATCCGTTGCTTGTTGCTTTC	60.257	20	214	22581	22794
PT-26125-26131	TCTTGAGCAACAGGACGATG	59.984	20	CTTCAGCCCTTGATTCGTGT	60.255	20	290	25913	26202	ACCAAAAGCGGGAGAATCTT	60.074	20	CTTCAGCCCTTGATTCGTGT	60.255	20	212	25991	26202	GAGAACCCAAAGGGAAAAGG	59.912	20	AACATCGTCTGCACATCGTC	59.714	20	262	26081	26342
PT-26520-26520	CCAGATTCCTTCATCCCAAA	59.864	20	CGATCTCTCGCTGGTTCTTC	60.096	20	177	26435	26611	CCAGATTCCTTCATCCCAAA	59.864	20	TCGATCTCTCGCTGGTTCTT	60.096	20	178	26435	26612	CCAGATTCCTTCATCCCAAA	59.864	20	CTCGAAGTCGATCTCTCGCT	59.851	20	185	26435	26619
PT-28427-28427	GGGAAATAGAAGCACAGCCA	60.214	20	AAAGCCCATTTATCGCACTG	60.096	20	270	28388	28657	GGGAAATAGAAGCACAGCCA	60.214	20	GGATGCTTTTCCTCTAGCCC	60.173	20	234	28388	28621	GGGAAATAGAAGCACAGCCA	60.214	20	CTCAAAAGCCCATTTATCGC	59.682	20	274	28388	28661
PT-30199-30204	TAGCCCCTCAAGTGAGGAAA	59.807	20	GCTGTGTCAACGGTCCACTA	59.751	20	227	30027	30253	TAGCCCCTCAAGTGAGGAAA	59.807	20	GAGAACTCGCTGTGTCAACG	59.622	20	235	30027	30261	CAAGTCAGCAAAGCGCTACA	60.338	20	GCTGTGTCAACGGTCCACTA	59.751	20	257	29997	30253
PT-37150-37156	AGTGGTAGTTGATCCAGCGG	60.134	20	TAGATGAAGTGAGCTCGGGG	60.353	20	265	36931	37195	GGTTTACCCCTCCCTCAAAA	60.159	20	TAGATGAAGTGAGCTCGGGG	60.353	20	201	36995	37195	TGTTGAGATTGGGTTGGGTT	60.21	20	TAGATGAAGTGAGCTCGGGG	60.353	20	217	36979	37195
PT-37632-37632	TTGGATTAGAATGGGTGGGA	60.126	20	CCTCTTTCATCGTCGTTGGT	60.111	20	156	37595	37750	TTGGATTAGAATGGGTGGGA	60.126	20	CTTTCATCGTCGTTGGTCCT	60.111	20	153	37595	37747	CGATTCGGAAGATACCTCCA	60.029	20	GCTGTCAGCTACCTCTGCCT	59.775	20	274	37421	37694
PT-39332-39338	CCAGCGGCTTATGTAGTGGT	60.154	20	GCAAATGAAGGGAGGCATTA	60.038	20	173	39267	39439	GCTTAGCAACGAATGAAGGG	59.845	20	GCAAATGAAGGGAGGCATTA	60.038	20	214	39226	39439	GGCTTAGCAACGAATGAAGG	59.845	20	GCAAATGAAGGGAGGCATTA	60.038	20	215	39225	39439
PT-41693-41693	GTCACCGAATGGGTCAGTCT	59.969	20	TCTTTCACGACATGCTCTGG	59.984	20	156	41649	41804	AGTCACCGAATGGGTCAGTC	59.969	20	TCTTTCACGACATGCTCTGG	59.984	20	157	41648	41804	CACCGAATGGGTCAGTCTTT	59.966	20	TCTTTCACGACATGCTCTGG	59.984	20	154	41651	41804
PT-42273-42275	CCTAAAGCGCACTATGCTCC	60.003	20	CGGTCGGTAGCTGCTTAGTC	60.037	20	230	42117	42346	CACTATGCTCCGCTTCAACA	60.011	20	CGGTCGGTAGCTGCTTAGTC	60.037	20	221	42126	42346	TGAGAGTTTTCGGTGGAACC	60.088	20	CGGTCGGTAGCTGCTTAGTC	60.037	20	199	42148	42346
PT-44897-44897	AAATCGATTATGCTCCTGCG	60.196	20	TGCTTCAATGGCTCGATATG	59.792	20	240	44814	45053	AAATCGATTATGCTCCTGCG	60.196	20	CGGTTTGCAACCCCTACTAC	59.494	20	159	44814	44972	AAATCGATTATGCTCCTGCG	60.196	20	AGTTGTGTACCGTCCGGTTT	59.377	20	173	44814	44986
PT-45520-45526	GATTCAAAAGAATTGGGCGA	60.016	20	CCCATAAAGCTTCCTTTCCC	59.903	20	240	45370	45609	ATTGGGCGAAGTGTTTGTTC	59.978	20	CCCATAAAGCTTCCTTTCCC	59.903	20	229	45381	45609	GAATTGGGCGAAGTGTTTGT	59.978	20	CCCATAAAGCTTCCTTTCCC	59.903	20	231	45379	45609
PT-46117-46117	CTCTTAGGAGCCGGTCACTG	60.005	20	TAAGCCAGCTCTTCGTTGGT	60.015	20	172	46018	46189	CTCTTAGGAGCCGGTCACTG	60.005	20	GTAAGCCAGCTCTTCGTTGG	60.015	20	173	46018	46190	CTCTTAGGAGCCGGTCACTG	60.005	20	GTCCGCTGATCCATCATTCT	60.042	20	291	46018	46308
PT-46942-46943	GAGCTCCCAACTACGTCGAG	60.012	20	CGCTAATGCCCTTAGAGTCG	59.996	20	156	46830	46985	GCTCAGAGCTCCCAACTACG	60.156	20	CGCTAATGCCCTTAGAGTCG	59.996	20	161	46825	46985	CTACGTCGAGCGAGTCAACA	60.199	20	GTACTCGCGAACCTCGTAGC	60.044	20	295	46840	47134
PT-47429-47435	GCGAGAGTTCTTGATGAGGG	59.95	20	AGGATAGGGTGCTCTCGGAT	60.059	20	202	47359	47560	CGAGAGTTCTTGATGAGGGC	59.95	20	AGGATAGGGTGCTCTCGGAT	60.059	20	201	47360	47560	GGCGAGAGTTCTTGATGAGG	59.95	20	AGGATAGGGTGCTCTCGGAT	60.059	20	203	47358	47560
PT-49079-49084	AAGTTTTGACCAGGGCAATG	59.971	20	TGACCCTGAAAGGGAGTTTG	60.081	20	151	49003	49153	AAGTTTTGACCAGGGCAATG	59.971	20	TTGGGAATGGAAGAACTTGG	59.903	20	246	49003	49248	AAGTTTTGACCAGGGCAATG	59.971	20	ATGGAAGAACTTGGGCACAG	60.111	20	240	49003	49242
PT-50415-50422	GTTCAGTTCAAAGGCGAAGC	60	20	AGACGGGGTCCAGAGACTTT	60.111	20	268	50311	50578	GTTCAGTTCAAAGGCGAAGC	60	20	ACCAAGTAGGCAAGCAGGAA	59.875	20	244	50311	50554	AAACGGCTGATCCAACTACG	60.132	20	TTCAAAGCCTAGAGCACCGT	60.015	20	288	50169	50456
PT-50975-50975	GCGTCCCCCGTATTAAACTT	60.204	20	ATGTCCAGCGCTTCCATATC	60.066	20	162	50854	51015	TTGATGAGGAGGTGGAAAGC	60.195	20	GCGCTTCCATATCACCTTGT	60.103	20	251	50758	51008	GCGTCCCCCGTATTAAACTT	60.204	20	GCGCTTCCATATCACCTTGT	60.103	20	155	50854	51008
PT-51857-51858	ATCATTCCACTGAGGGCTTG	60.073	20	TCGTCAACCCTCGTAACTCC	60.111	20	270	51796	52065	CCACTGAGGGCTTGAGGTAG	59.861	20	TCGTCAACCCTCGTAACTCC	60.111	20	264	51802	52065	ATCATTCCACTGAGGGCTTG	60.073	20	AGGAAGCGTCTTTCTTCCGT	60.382	20	236	51796	52031
PT-52499-52504	CTTGGCTTTACGGCTTTACG	59.904	20	ATGTTCTTCCCGAGCAAATG	60.074	20	231	52468	52698	GCAATAACAGCAGACGCAGA	60.165	20	ATGTTCTTCCCGAGCAAATG	60.074	20	282	52417	52698	CTTGGCTTTACGGCTTTACG	59.904	20	TCCCGAGCAAATGTTCTTCT	59.813	20	224	52468	52691
PT-53674-53674	GGGAGCACAGCAATAGGAAG	59.836	20	TCAAGCCGGTAAACAAATCC	59.938	20	287	53560	53846	TACACTTTGCCTTGGCTCCT	59.875	20	CGGTAAGTGTGGGTCTGGTT	59.884	20	228	53507	53734	GGGAGCACAGCAATAGGAAG	59.836	20	CGGTAAGTGTGGGTCTGGTT	59.884	20	175	53560	53734
PT-53894-53895	GGATTTGTTTACCGGCTTGA	59.938	20	ACACAAGGGGGATTCCTACC	60.052	20	257	53827	54083	TCGAAAGAGGGAGCAGAAAA	60.066	20	GGGATTCCTACCGTAAAGCC	59.799	20	294	53782	54075	TCGAAAGAGGGAGCAGAAAA	60.066	20	GGGGATTCCTACCGTAAAGC	59.799	20	295	53782	54076
PT-54729-54761	GGCCTGTCAAAATACCCTCA	59.933	20	ACAATACAAGGCGGTTAGCG	60.152	20	280	54536	54815	TAAGCCAGGTTAAGTCCCCC	60.312	20	GCCGAAAACCAATCAAAGAA	60.053	20	278	54625	54902	GGCCTGTCAAAATACCCTCA	59.933	20	CGAGGAGCATTCCTTACCAC	59.694	20	298	54536	54833
PT-55585-55585	TTTTGATGGCCAGGTAAAGG	59.931	20	CATGCCTACCCTTGCTTTGT	60.132	20	224	55455	55678	TTTTGATGGCCAGGTAAAGG	59.931	20	CATGGCACTAGCACGAGAGA	60.16	20	196	55455	55650	TTTTGATGGCCAGGTAAAGG	59.931	20	TCATGGCACTAGCACGAGAG	60.16	20	197	55455	55651
PT-57498-57564	CGGTTAGGGCAGGTCTGTTA	60.125	20	CCGTTTCCTATTGGACTGGA	59.926	20	270	57398	57667	CGGTTAGGGCAGGTCTGTTA	60.125	20	TCCGTTTCCTATTGGACTGG	59.926	20	271	57398	57668	ATCAGGTTCGAGATGGCAAG	60.218	20	CCGTTTCCTATTGGACTGGA	59.926	20	292	57376	57667
PT-57631-57631	CGGTTAGGGCAGGTCTGTTA	60.125	20	CCGTTTCCTATTGGACTGGA	59.926	20	270	57398	57667	CGGTTAGGGCAGGTCTGTTA	60.125	20	TCCGTTTCCTATTGGACTGG	59.926	20	271	57398	57668	ATCAGGTTCGAGATGGCAAG	60.218	20	CCGTTTCCTATTGGACTGGA	59.926	20	292	57376	57667
PT-57758-57758	CCAGTCCAATAGGAAACGGA	59.926	20	CGGACTTAGAGTGAAAGCGG	60.008	20	189	57649	57837	CCAGTCCAATAGGAAACGGA	59.926	20	CCGGACTTAGAGTGAAAGCG	60.008	20	190	57649	57838	TCCAGTCCAATAGGAAACGG	59.926	20	CGGACTTAGAGTGAAAGCGG	60.008	20	190	57648	57837
PT-57917-57917	CCGCTTTCACTCTAAGTCCG	60.008	20	GCGAAGAAGCTTAGTCCCCT	59.983	20	253	57818	58070	CCGCTTTCACTCTAAGTCCG	60.008	20	CCCTGAGCTCTAGCGAAGAA	59.853	20	265	57818	58082	CCGCTTTCACTCTAAGTCCG	60.008	20	CCTGAGCGTAAGCGAAGAAG	60.284	20	226	57818	58043
PT-58042-58042	CCGCTTTCACTCTAAGTCCG	60.008	20	GCGAAGAAGCTTAGTCCCCT	59.983	20	253	57818	58070	CCGCTTTCACTCTAAGTCCG	60.008	20	CCCTGAGCTCTAGCGAAGAA	59.853	20	265	57818	58082	TCCGGATGTAGACAAACCGT	60.375	20	GCGAAGAAGCTTAGTCCCCT	59.983	20	237	57834	58070
PT-58491-58491	TTCGAAGATCCTCTGGTGCT	59.95	20	TGCTGGTACTCCATGCAAAG	59.864	20	281	58389	58669	TCGAAGATCCTCTGGTGCTT	59.95	20	TGCTGGTACTCCATGCAAAG	59.864	20	280	58390	58669	TTCGAAGATCCTCTGGTGCT	59.95	20	CAAAGGTTCAACGCAAAGGT	60.147	20	266	58389	58654
PT-58761-58761	ACCTTTGCGTTGAACCTTTG	60.147	20	CGAGGGATGAGAGAAACCAA	60.187	20	279	58635	58913	ACGATAATAAACCCCCGCTT	59.701	20	CGAGGGATGAGAGAAACCAA	60.187	20	216	58698	58913	ACCTTTGCGTTGAACCTTTG	60.147	20	ATGAACCGAGGGATGAGAGA	59.612	20	285	58635	58919
PT-59068-59073	TGAGTCCTCTATCCCGGTTC	59.09	20	CTGCTCTCTTCTAATGGCGG	60.11	20	240	59028	59267	GAGTCCTCTATCCCGGTTCG	60.979	20	CTGCTCTCTTCTAATGGCGG	60.11	20	239	59029	59267	TTGGTTTCTCTCATCCCTCG	60.187	20	CGCAGGTCTGCTATAGTGGC	60.955	20	298	58894	59191
PT-59126-59141	TGAGTCCTCTATCCCGGTTC	59.09	20	CTGCTCTCTTCTAATGGCGG	60.11	20	240	59028	59267	GAGTCCTCTATCCCGGTTCG	60.979	20	CTGCTCTCTTCTAATGGCGG	60.11	20	239	59029	59267	TTGGTTTCTCTCATCCCTCG	60.187	20	CGCAGGTCTGCTATAGTGGC	60.955	20	298	58894	59191
PT-59218-59250	GCAGACCTGCGTGAAATAGG	60.796	20	TACACTCTTCCTTGGGACCG	60.103	20	251	59181	59431	GCAGACCTGCGTGAAATAGG	60.796	20	CCTGCAAGTAACCAACCCAT	59.853	20	180	59181	59360	GCAGACCTGCGTGAAATAGG	60.796	20	TTTGGTAGGACTAGCCGGAA	59.702	20	299	59181	59479
PT-59464-59484	CGGTCCCAAGGAAGAGTGTA	60.103	20	CGGATTGGCTTAACGACTTC	59.708	20	262	59412	59673	AAGGTCCCGTAGTTTGGAGG	60.353	20	CGGATTGGCTTAACGACTTC	59.708	20	282	59392	59673	CCGCCATTAGAAGAGAGCAG	60.11	20	ATTCCTTGGGAACCTAACCC	59.148	20	260	59248	59507
PT-59712-59712	CCGTACGGTTTCTTCCTTGA	60.103	20	TCGCTTGAAGAGGACCAAGT	59.989	20	174	59671	59844	TCCGTACGGTTTCTTCCTTG	60.103	20	TCGCTTGAAGAGGACCAAGT	59.989	20	175	59670	59844	TCCGTACGGTTTCTTCCTTG	60.103	20	CGCTTGAAGAGGACCAAGTC	59.989	20	174	59670	59843
PT-59783-59783	CCGTACGGTTTCTTCCTTGA	60.103	20	TCGCTTGAAGAGGACCAAGT	59.989	20	174	59671	59844	TCCGTACGGTTTCTTCCTTG	60.103	20	TCGCTTGAAGAGGACCAAGT	59.989	20	175	59670	59844	TCCGTACGGTTTCTTCCTTG	60.103	20	CGCTTGAAGAGGACCAAGTC	59.989	20	174	59670	59843
PT-59930-59930	ACTTGGTCCTCTTCAAGCGA	59.989	20	CGTGCTTGCATCCCTTTTAT	60.096	20	213	59825	60037	TGGTCCTCTTCAAGCGATCT	59.95	20	CGTGCTTGCATCCCTTTTAT	60.096	20	210	59828	60037	GGCAGCTGTCTGATGAGTGA	60.146	20	CGTGCTTGCATCCCTTTTAT	60.096	20	179	59859	60037
PT-59976-60010	ACTTGGTCCTCTTCAAGCGA	59.989	20	CGTGCTTGCATCCCTTTTAT	60.096	20	213	59825	60037	TGGTCCTCTTCAAGCGATCT	59.95	20	CGTGCTTGCATCCCTTTTAT	60.096	20	210	59828	60037	GGCAGCTGTCTGATGAGTGA	60.146	20	CGTGCTTGCATCCCTTTTAT	60.096	20	179	59859	60037
PT-60086-60090	GCTGATAGGCCTGGAATCAG	59.797	20	TGAGCTAGCTTGGAATGCCT	60.118	20	300	59923	60222	ATGCAAGCACGGAATCCTAT	59.556	20	TGAGCTAGCTTGGAATGCCT	60.118	20	196	60027	60222	CGCCTTCCGATTGTCTTAGT	59.336	20	TGAGCTAGCTTGGAATGCCT	60.118	20	167	60056	60222
PT-60240-60240	ATAAAAGGGATGCAAGCACG	60.096	20	TCCAGAGCTTGACTAGGGACA	59.997	21	266	60018	60283	GGCATTCCAAGCTAGCTCAT	59.439	20	TTAGTTCTCGCCAAAGACCC	59.312	20	276	60204	60479	ATGCAAGCACGGAATCCTAT	59.556	20	TCCAGAGCTTGACTAGGGACA	59.997	21	257	60027	60283
PT-60288-60306	GATAAGGCCGACCTTTTTGA	59.158	20	CCAGACCAGCTCTTTGCTTT	59.615	20	300	60231	60530	GGCATTCCAAGCTAGCTCAT	59.439	20	TTAGTTCTCGCCAAAGACCC	59.312	20	276	60204	60479	CGCCTTCCGATTGTCTTAGT	59.336	20	CCCGCACCTTCAATACGATA	60.846	20	286	60056	60341
PT-60357-60357	TATCGTATTGAAGGTGCGGG	60.846	20	TTCCGGAAATGAAAAGATGC	60.016	20	233	60322	60554	TATCGTATTGAAGGTGCGGG	60.846	20	AAAAGATGCACGACCAGACC	60.119	20	222	60322	60543	GATAAGGCCGACCTTTTTGA	59.158	20	CCAGACCAGCTCTTTGCTTT	59.615	20	300	60231	60530
PT-60473-60527	CGGATCTGCTAATGGTAGCG	60.752	20	TTCCGGAAATGAAAAGATGC	60.016	20	186	60369	60554	ACTGTCTGAAAGTGGCAGGC	60.453	20	AGATGAGCGATTCCAGATGC	60.335	20	231	60436	60666	TATCGTATTGAAGGTGCGGG	60.846	20	TTCCGGAAATGAAAAGATGC	60.016	20	233	60322	60554
PT-60689-60703	GGTCTGGTCGTGCATCTTTT	60.119	20	GAGAGGCCTAATACCCGGAC	59.925	20	269	60524	60792	GGTCTGGTCGTGCATCTTTT	60.119	20	AATACCCGGACCTATTCGCT	59.82	20	260	60524	60783	GGTCTGGTCGTGCATCTTTT	60.119	20	AGGCCTAATACCCGGACCTA	59.814	20	266	60524	60789
PT-60777-60777	GCATCTGGAATCGCTCATCT	60.335	20	ATTGACCAGCGATGATAGCC	60.066	20	193	60647	60839	GCATCTGGAATCGCTCATCT	60.335	20	AAGGTTTTCATTGACCAGCG	60.11	20	202	60647	60848	TCAGGACGTTCTATTCCCGT	59.55	20	GGTTTTCATTGACCAGCGAT	59.939	20	237	60610	60846
PT-60977-60977	CCCCTTCTTCCTCGAGTTCT	59.811	20	TTACCGGATTCCAACCTTGA	60.301	20	262	60899	61160	CCCCTTCTTCCTCGAGTTCT	59.811	20	TGCGCCTATTTATTACCGGA	60.424	20	274	60899	61172	GTCCCCTTCTTCCTCGAGTT	59.676	20	TTACCGGATTCCAACCTTGA	60.301	20	264	60897	61160
PT-61214-61221	AGGCGCATATAGGCCTTCTT	60.211	20	AGAAGCAAGCAACGGACAGT	60.058	20	168	61166	61333	AGGCGCATATAGGCCTTCTT	60.211	20	AAGCAAGCAACGGACAGTTT	59.92	20	166	61166	61331	TCAAGGTTGGAATCCGGTAA	60.301	20	AGAAGCAAGCAACGGACAGT	60.058	20	193	61141	61333
PT-61271-61299	AGGCGCATATAGGCCTTCTT	60.211	20	AGAAGCAAGCAACGGACAGT	60.058	20	168	61166	61333	AGGCGCATATAGGCCTTCTT	60.211	20	AAGCAAGCAACGGACAGTTT	59.92	20	166	61166	61331	TCAAGGTTGGAATCCGGTAA	60.301	20	AGAAGCAAGCAACGGACAGT	60.058	20	193	61141	61333
PT-61641-61641	AAGCAAAGAAGTAGGCGCAG	59.791	20	GAATCTTTCTTGCCTGCTCG	60.096	20	280	61429	61708	GGGAATGGTTTAGCTCGGTT	60.32	20	TCGATCTTCCTCTCTCCGAA	60.027	20	277	61596	61872	AAGCAAAGAAGTAGGCGCAG	59.791	20	CGAAAGGGTGAGTTGATGCT	60.255	20	240	61429	61668
PT-61722-61722	TAAGGCACCACCCTAGCATC	60.096	20	TCGATCTTCCTCTCTCCGAA	60.027	20	238	61635	61872	TCGAGCAGGCAAGAAAGATT	60.096	20	TCGATCTTCCTCTCTCCGAA	60.027	20	185	61688	61872	CGAGCAGGCAAGAAAGATTC	60.096	20	TCGATCTTCCTCTCTCCGAA	60.027	20	184	61689	61872
PT-61856-61856	TAAGGCACCACCCTAGCATC	60.096	20	TAAGTGGTCAAACCATCCCC	59.647	20	293	61635	61927	TCGAGCAGGCAAGAAAGATT	60.096	20	TAAGTGGTCAAACCATCCCC	59.647	20	240	61688	61927	CGAGCAGGCAAGAAAGATTC	60.096	20	TAAGTGGTCAAACCATCCCC	59.647	20	239	61689	61927
PT-61969-61969	CTAGCCAACCAAAGTGGAGG	59.728	20	TGGTCCCCTTTGAAGACAAG	60.081	20	198	61873	62070	CTAGCCAACCAAAGTGGAGG	59.728	20	CTGGTCCCCTTTGAAGACAA	60.081	20	199	61873	62071	CTAGCCAACCAAAGTGGAGG	59.728	20	GGAGGCTCTCGCTTTTTCTT	60.096	20	282	61873	62154
PT-62044-62044	CAGAGGGAGTTGATTCCCAA	60.042	20	GGAGGCTCTCGCTTTTTCTT	60.096	20	161	61994	62154	CTAGCCAACCAAAGTGGAGG	59.728	20	TGGTCCCCTTTGAAGACAAG	60.081	20	198	61873	62070	CTAGCCAACCAAAGTGGAGG	59.728	20	CTGGTCCCCTTTGAAGACAA	60.081	20	199	61873	62071
PT-62132-62153	TTGTCTTCAAAGGGGACCAG	60.081	20	GGCGGAGCTTACTTAGCCTT	60.007	20	257	62052	62308	CTTGTCTTCAAAGGGGACCA	60.081	20	GGCGGAGCTTACTTAGCCTT	60.007	20	258	62051	62308	ATGGGGAAGAAAAGAATGCC	60.265	20	GGCGGAGCTTACTTAGCCTT	60.007	20	207	62102	62308
PT-62210-62210	TTGTCTTCAAAGGGGACCAG	60.081	20	GGCGGAGCTTACTTAGCCTT	60.007	20	257	62052	62308	CTTGTCTTCAAAGGGGACCA	60.081	20	GGCGGAGCTTACTTAGCCTT	60.007	20	258	62051	62308	AAGAAAAAGCGAGAGCCTCC	60.096	20	TCGCCCAGAAGAATGGTATC	60.036	20	288	62135	62422
PT-62305-62305	AAGAAAAAGCGAGAGCCTCC	60.096	20	TCGCCCAGAAGAATGGTATC	60.036	20	288	62135	62422	AAGAAAAAGCGAGAGCCTCC	60.096	20	AAGAATGGTATCGTCCGCAG	60.096	20	280	62135	62414	AAGAAAAAGCGAGAGCCTCC	60.096	20	TTTCTGGAGCGAGAAGCATT	60.096	20	246	62135	62380
PT-62383-62383	AAGGCTAAGTAAGCTCCGCC	60.007	20	CAGCCTTGCGGTTTCTACTC	60.015	20	285	62289	62573	AAGGCTAAGTAAGCTCCGCC	60.007	20	TGATGCATCTGGCTTCTTTG	59.948	20	167	62289	62455	AAGAAAAAGCGAGAGCCTCC	60.096	20	TCGCCCAGAAGAATGGTATC	60.036	20	288	62135	62422
PT-62415-62443	AAGGCTAAGTAAGCTCCGCC	60.007	20	CAGCCTTGCGGTTTCTACTC	60.015	20	285	62289	62573	AAGGCTAAGTAAGCTCCGCC	60.007	20	CTTGCGGTTTCTACTCCCAC	59.734	20	281	62289	62569	AAGGCTAAGTAAGCTCCGCC	60.007	20	GGTCGGGAAAATGGTATTGA	59.622	20	254	62289	62542
PT-62754-62762	ATAGATGGCTGTCACTCCCG	60.096	20	TTTGCTTGCCGTTCTTTTCT	59.996	20	261	62671	62931	CTGTCACTCCCGTGGAGAAT	60.112	20	TTTGCTTGCCGTTCTTTTCT	59.996	20	253	62679	62931	ATAGATGGCTGTCACTCCCG	60.096	20	TTAGGTCTCTCGGGGAGGTT	60.067	20	296	62671	62966
PT-62793-62819	ATAGATGGCTGTCACTCCCG	60.096	20	TTTGCTTGCCGTTCTTTTCT	59.996	20	261	62671	62931	CTGTCACTCCCGTGGAGAAT	60.112	20	TTTGCTTGCCGTTCTTTTCT	59.996	20	253	62679	62931	ATAGATGGCTGTCACTCCCG	60.096	20	TTAGGTCTCTCGGGGAGGTT	60.067	20	296	62671	62966
PT-62979-63073	AGAAAAGAACGGCAAGCAAA	59.996	20	TGAGAGTAGACCGGGAAGGA	59.797	20	235	62912	63146	AACCTCCCCGAGAGACCTAA	60.067	20	TGAGAGTAGACCGGGAAGGA	59.797	20	200	62947	63146	AGGCCAAGCCCTTCATTATT	59.93	20	TGAGAGTAGACCGGGAAGGA	59.797	20	294	62853	63146
PT-63166-63166	CCCAAACGAAGTCACAAGGT	60.005	20	CTTAAGACCACGTCTTCCGC	59.875	20	228	63075	63302	CCCAAACGAAGTCACAAGGT	60.005	20	TACCGGCTTAAGACCACGTC	60.132	20	234	63075	63308	AACCTCCCCGAGAGACCTAA	60.067	20	TCCTTCCTTTGTGAAGACCG	60.224	20	266	62947	63212
PT-63583-63583	AAAGGGCAAGAGACAAGCAA	59.993	20	GTCTACAGAGGACCCCTCCC	59.929	20	177	63462	63638	AAAGGGCAAGAGACAAGCAA	59.993	20	TTTTCAAGGACCCACTCCTG	60.081	20	280	63462	63741	AAAGGGCAAGAGACAAGCAA	59.993	20	TGGAATTTTCAAGGACCCAC	59.767	20	285	63462	63746
PT-63658-63664	AAAGGGCAAGAGACAAGCAA	59.993	20	TTTTCAAGGACCCACTCCTG	60.081	20	280	63462	63741	AAAGGGCAAGAGACAAGCAA	59.993	20	TGGAATTTTCAAGGACCCAC	59.767	20	285	63462	63746	AAAGGGCAAGAGACAAGCAA	59.993	20	TTGGAATTTTCAAGGACCCA	60.28	20	286	63462	63747
PT-63752-63752	CAGGAGTGGGTCCTTGAAAA	60.081	20	TGCTTGAGCATAGCTTGGTG	60.157	20	265	63722	63986	GGGAGGGGTCCTCTGTAGAC	59.929	20	CAGAACAGGGGGCATACAAC	60.375	20	284	63619	63902	CAGGAGTGGGTCCTTGAAAA	60.081	20	CAGAACAGGGGGCATACAAC	60.375	20	181	63722	63902
PT-63942-63942	CAGGAGTGGGTCCTTGAAAA	60.081	20	TGCTTGAGCATAGCTTGGTG	60.157	20	265	63722	63986	GTTGTATGCCCCCTGTTCTG	60.375	20	TAAACCCTTTTTGCCCAATG	59.805	20	155	63883	64037	GTTGTATGCCCCCTGTTCTG	60.375	20	TATTTGACCGCGATTTACCC	59.795	20	277	63883	64159
PT-64046-64046	TGCACCAAGCTATGCTCAAG	60.157	20	TATTTGACCGCGATTTACCC	59.795	20	195	63965	64159	TGCACCAAGCTATGCTCAAG	60.157	20	TACGCTTGTTCGAAAGTCCC	60.249	20	293	63965	64257	CATTGGGCAAAAAGGGTTTA	59.805	20	TACGCTTGTTCGAAAGTCCC	60.249	20	240	64018	64257
PT-64108-64108	TGCACCAAGCTATGCTCAAG	60.157	20	TATTTGACCGCGATTTACCC	59.795	20	195	63965	64159	TGCACCAAGCTATGCTCAAG	60.157	20	TACGCTTGTTCGAAAGTCCC	60.249	20	293	63965	64257	CATTGGGCAAAAAGGGTTTA	59.805	20	TACGCTTGTTCGAAAGTCCC	60.249	20	240	64018	64257
PT-64326-64353	GGGTAAATCGCGGTCAAATA	59.795	20	CCGGAGGAAGGAATGGAATA	61.135	20	252	64140	64391	GGGACTTTCGAACAAGCGTA	60.249	20	CCGGAGGAAGGAATGGAATA	61.135	20	154	64238	64391	GGGTAAATCGCGGTCAAATA	59.795	20	AATTCAGTTTAGCTAGCCCCG	59.765	21	270	64140	64409
PT-64443-64443	AAGCCGTCTAGCCCTTTTTC	59.856	20	AGACACCAATCACCAGTCCC	59.817	20	299	64322	64620	AAGCCGTCTAGCCCTTTTTC	59.856	20	GACACCAATCACCAGTCCCT	59.817	20	298	64322	64619	AGCCGTCTAGCCCTTTTTCT	59.504	20	AGACACCAATCACCAGTCCC	59.817	20	298	64323	64620
PT-64597-64597	AAGCCGTCTAGCCCTTTTTC	59.856	20	AGACACCAATCACCAGTCCC	59.817	20	299	64322	64620	CGGACAAGTGGTCCATTCTT	59.966	20	ATTGGAAAGCTGCGAAGTTG	60.386	20	155	64507	64661	AGCCGTCTAGCCCTTTTTCT	59.504	20	AGACACCAATCACCAGTCCC	59.817	20	298	64323	64620
PT-64698-64698	CCTTAGGTCAGCAACTTCGC	60.015	20	CGGAAGCTAGTAAGCAAGCG	60.298	20	198	64631	64828	CCCTTAGGTCAGCAACTTCG	59.869	20	CGGAAGCTAGTAAGCAAGCG	60.298	20	199	64630	64828	CCTTAGGTCAGCAACTTCGC	60.015	20	TCTAAAGAAGAGATCGGGCG	59.546	20	216	64631	64846
PT-64761-64761	CCTTAGGTCAGCAACTTCGC	60.015	20	CGGAAGCTAGTAAGCAAGCG	60.298	20	198	64631	64828	CCCTTAGGTCAGCAACTTCG	59.869	20	CGGAAGCTAGTAAGCAAGCG	60.298	20	199	64630	64828	CCTTAGGTCAGCAACTTCGC	60.015	20	TCTAAAGAAGAGATCGGGCG	59.546	20	216	64631	64846
PT-64815-64834	TGCAGTCCGTCGAGTAGTCA	60.616	20	TCGATTCAATGGGGGAATAA	60.088	20	298	64721	65018	CCGTCGAGTAGTCAATGTCG	59.314	20	TCGATTCAATGGGGGAATAA	60.088	20	292	64727	65018	TGCAGTCCGTCGAGTAGTCA	60.616	20	CTCGATTCAATGGGGGAATA	59.717	20	299	64721	65019
PT-65093-65093	TTGAATCGAGACTGGCAATG	59.799	20	TAAAAGGAAGGCATGTTGGC	60.074	20	236	65010	65245	CATTGAATCGAGACTGGCAA	59.799	20	TAAAAGGAAGGCATGTTGGC	60.074	20	238	65008	65245	AGGACCGTCAACTCCAACAG	60.151	20	AGCATTCACCGAAGGTAACG	60.132	20	160	65061	65220
PT-65138-65138	TTGAATCGAGACTGGCAATG	59.799	20	TAAAAGGAAGGCATGTTGGC	60.074	20	236	65010	65245	CATTGAATCGAGACTGGCAA	59.799	20	TAAAAGGAAGGCATGTTGGC	60.074	20	238	65008	65245	AGGACCGTCAACTCCAACAG	60.151	20	AGCATTCACCGAAGGTAACG	60.132	20	160	65061	65220
PT-65294-65294	ACGTTACCTTCGGTGAATGC	60	20	GTGTGCATCCCCTTTTCAGT	59.973	20	180	65200	65379	ACGTTACCTTCGGTGAATGC	60	20	TTCGACCAGTCCCTCCATAG	60.065	20	298	65200	65497	ACGTTACCTTCGGTGAATGC	60	20	CTTCGACCAGTCCCTCCATA	60.065	20	299	65200	65498
PT-65363-65363	ACGTTACCTTCGGTGAATGC	60	20	TTCGACCAGTCCCTCCATAG	60.065	20	298	65200	65497	ACGTTACCTTCGGTGAATGC	60	20	CTTCGACCAGTCCCTCCATA	60.065	20	299	65200	65498	GCCAACATGCCTTCCTTTTA	60.074	20	TTCGACCAGTCCCTCCATAG	60.065	20	272	65226	65497
PT-65986-65986	TGCATAAACCTGATAGCCCC	59.923	20	GTGGGAACTCGCTTTGAATC	59.676	20	299	65778	66076	TTACTACCCTCGGTCCCTCA	59.545	20	TCTCTCGTCGAGTGGGAACT	59.986	20	248	65840	66087	CCTTACTACCCTCGGTCCCT	59.457	20	TCTCTCGTCGAGTGGGAACT	59.986	20	250	65838	66087
PT-66082-66082	GCGATTGCGATTCAATACCT	60.067	20	TGAACTGGCAATTCTTTCCC	60.051	20	202	66032	66233	GATTCAAAGCGAGTTCCCAC	59.676	20	TGAACTGGCAATTCTTTCCC	60.051	20	177	66057	66233	GCGATTGCGATTCAATACCT	60.067	20	CAATTCTTTCCCAATCGCTC	59.645	20	194	66032	66225
PT-66145-66146	GCGATTGCGATTCAATACCT	60.067	20	TGAACTGGCAATTCTTTCCC	60.051	20	202	66032	66233	GATTCAAAGCGAGTTCCCAC	59.676	20	TGAACTGGCAATTCTTTCCC	60.051	20	177	66057	66233	GCGATTGCGATTCAATACCT	60.067	20	CAATTCTTTCCCAATCGCTC	59.645	20	194	66032	66225
PT-66177-66177	GCGATTGCGATTCAATACCT	60.067	20	TGAACTGGCAATTCTTTCCC	60.051	20	202	66032	66233	GATTCAAAGCGAGTTCCCAC	59.676	20	TGAACTGGCAATTCTTTCCC	60.051	20	177	66057	66233	GCGATTGCGATTCAATACCT	60.067	20	CAATTCTTTCCCAATCGCTC	59.645	20	194	66032	66225
PT-66489-66489	ACCCGGGCCTTCTACTAAGA	60.089	20	GAGAAGAGGCTCCGAAAGGT	59.957	20	294	66403	66696	ACCCGGGCCTTCTACTAAGA	60.089	20	AGAGAAGAGGCTCCGAAAGG	60.088	20	295	66403	66697	ACCCGGGCCTTCTACTAAGA	60.089	20	GCTCCGAAAGGTTTAGGCTT	59.856	20	286	66403	66688
PT-66685-66685	AGGGATATTGCCTCAAGCCT	60.06	20	ACCTTCTCCGGTCTGTGATG	60.112	20	292	66655	66946	AGGGATATTGCCTCAAGCCT	60.06	20	GTGACTTGCCTTCTCCCTTG	59.844	20	152	66655	66806	TGCTTACACCGACAACCGTA	60.172	20	GTGACTTGCCTTCTCCCTTG	59.844	20	190	66617	66806
PT-66957-66980	CAAGGGAGAAGGCAAGTCAC	59.844	20	TCATGCTCCGGAATTAGGAT	59.486	20	239	66787	67025	CTTAAGCCCAAGGGAGAAGG	60.193	20	TCATGCTCCGGAATTAGGAT	59.486	20	247	66779	67025	CCTTAAGCCCAAGGGAGAAG	60.193	20	TCATGCTCCGGAATTAGGAT	59.486	20	248	66778	67025
PT-67187-67187	AAGCCTTGTAGCAGGTGTGG	60.312	20	AGAACCCACAATATGCCAGC	59.962	20	269	67132	67400	GCATCCTGCTGGAGTCTTTT	59.434	20	TCAGAACCCACAATATGCCA	59.924	20	252	67151	67402	GATAAGACCCCAAGACGCAA	60.074	20	GGGATTTCAAACAAGATCGG	59.363	20	257	66963	67219
PT-67283-67293	AAGCCTTGTAGCAGGTGTGG	60.312	20	AGAACCCACAATATGCCAGC	59.962	20	269	67132	67400	GCATCCTGCTGGAGTCTTTT	59.434	20	TCAGAACCCACAATATGCCA	59.924	20	252	67151	67402	CCGATCTTGTTTGAAATCCC	59.363	20	AGAACCCACAATATGCCAGC	59.962	20	201	67200	67400
PT-67368-67374	AAGCCTTGTAGCAGGTGTGG	60.312	20	AGAACCCACAATATGCCAGC	59.962	20	269	67132	67400	GCATCCTGCTGGAGTCTTTT	59.434	20	TCAGAACCCACAATATGCCA	59.924	20	252	67151	67402	CCGATCTTGTTTGAAATCCC	59.363	20	AGAACCCACAATATGCCAGC	59.962	20	201	67200	67400
PT-67539-67541	GCTGGCATATTGTGGGTTCT	59.962	20	AGCATAGTGCTTAGGCCGAG	59.637	20	269	67381	67649	TGGCATATTGTGGGTTCTGA	59.924	20	AGCATAGTGCTTAGGCCGAG	59.637	20	267	67383	67649	TGGCATATTGTGGGTTCTGA	59.924	20	GGTAGCTCGGAGAAAGCAAA	59.592	20	195	67383	67577
PT-67804-67861	CGCCTGCTAACTATTCTCGG	59.996	20	CTTAATGGCTCGAGCAGGAC	59.978	20	297	67769	68065	CGCCTGCTAACTATTCTCGG	59.996	20	GCAGGACAAGCAATCTCCTC	59.957	20	284	67769	68052	CGCCTGCTAACTATTCTCGG	59.996	20	GAGCAGGACAAGCAATCTCC	59.957	20	286	67769	68054
PT-68027-68027	CGCCTGCTAACTATTCTCGG	59.996	20	CTTAATGGCTCGAGCAGGAC	59.978	20	297	67769	68065	CGCCTGCTAACTATTCTCGG	59.996	20	GCAGGACAAGCAATCTCCTC	59.957	20	284	67769	68052	CGCCTGCTAACTATTCTCGG	59.996	20	GAGCAGGACAAGCAATCTCC	59.957	20	286	67769	68054
PT-68235-68235	GTCCTGCTCGAGCCATTAAG	59.978	20	TCAGGCATTATGAGTGCAGC	59.979	20	272	68046	68317	GGAGATTGCTTGTCCTGCTC	59.957	20	TCAGGCATTATGAGTGCAGC	59.979	20	283	68035	68317	GAGGAGATTGCTTGTCCTGC	59.957	20	TCAGGCATTATGAGTGCAGC	59.979	20	285	68033	68317
PT-68404-68404	GCTGCACTCATAATGCCTGA	59.979	20	TTTAGGTACGCACCTTTGGC	60.131	20	227	68298	68524	CGGCCACTTCCTGGTTAATA	59.953	20	TTTAGGTACGCACCTTTGGC	60.131	20	156	68369	68524	CGGCCACTTCCTGGTTAATA	59.953	20	GCAAGAGTGGAAGGCTTCTG	60.134	20	234	68369	68602
PT-68436-68436	GCTGCACTCATAATGCCTGA	59.979	20	TTTAGGTACGCACCTTTGGC	60.131	20	227	68298	68524	CGGCCACTTCCTGGTTAATA	59.953	20	TTTAGGTACGCACCTTTGGC	60.131	20	156	68369	68524	CGGCCACTTCCTGGTTAATA	59.953	20	GCAAGAGTGGAAGGCTTCTG	60.134	20	234	68369	68602
PT-68623-68628	TCGCTCCTTACGAGCAATTT	59.982	20	ATCGAATTGTGGATTTGGGA	60.133	20	248	68452	68699	TCGCTCCTTACGAGCAATTT	59.982	20	CGAATTGTGGATTTGGGAAC	60.17	20	246	68452	68697	CAGAAGCCTTCCACTCTTGC	60.134	20	GTTTCGTTTCAGGGTAGCCA	60.11	20	196	68583	68778
PT-68864-68864	GGCTACCCTGAAACGAAACA	60.11	20	CCGGATACCATTCCTGCTAA	59.916	20	217	68760	68976	TGGCTACCCTGAAACGAAAC	60.11	20	CCGGATACCATTCCTGCTAA	59.916	20	218	68759	68976	TCCCAAATCCACAATTCGAT	60.133	20	CCGGATACCATTCCTGCTAA	59.916	20	297	68680	68976
PT-68943-68955	TCCTTCGCGAGGAAATAAGA	59.916	20	GCCTTTAAACAAACCAGGCA	60.11	20	234	68902	69135	GGCTACCCTGAAACGAAACA	60.11	20	TTGGAATGCACGTTCTGGTA	60.111	20	245	68760	69004	TGGCTACCCTGAAACGAAAC	60.11	20	TTGGAATGCACGTTCTGGTA	60.111	20	246	68759	69004
PT-68988-68988	TCCTTCGCGAGGAAATAAGA	59.916	20	GCCTTTAAACAAACCAGGCA	60.11	20	234	68902	69135	GAGAGCGGAGTTGAAAGTCG	60.134	20	GCCTTTAAACAAACCAGGCA	60.11	20	199	68937	69135	AGTTGGTTTGAGCGCTTAGG	59.517	20	GCCTTTAAACAAACCAGGCA	60.11	20	284	68852	69135
PT-69159-69159	TACCAGAACGTGCATTCCAA	60.111	20	AGCCAGAGCAGAGTAGACGC	59.921	20	276	68985	69260	TGCCTGGTTTGTTTAAAGGC	60.11	20	AGGAAGAGAAGCCAGAAGCC	60.096	20	161	69116	69276	TACCAGAACGTGCATTCCAA	60.111	20	AGGAAGAGAAGCCAGAAGCC	60.096	20	292	68985	69276
PT-69227-69227	TACCAGAACGTGCATTCCAA	60.111	20	AGCCAGAGCAGAGTAGACGC	59.921	20	276	68985	69260	TGCCTGGTTTGTTTAAAGGC	60.11	20	AGGAAGAGAAGCCAGAAGCC	60.096	20	161	69116	69276	TACCAGAACGTGCATTCCAA	60.111	20	AGGAAGAGAAGCCAGAAGCC	60.096	20	292	68985	69276
PT-69271-69318	GCGTCTACTCTGCTCTGGCT	59.921	20	CCTCATAGCCTTTCCAGCAG	59.971	20	263	69241	69503	AGCGTCTACTCTGCTCTGGC	59.921	20	CCTCATAGCCTTTCCAGCAG	59.971	20	264	69240	69503	GCGTCTACTCTGCTCTGGCT	59.921	20	GCTATCCGTGGGGAGGTTAT	60.173	20	191	69241	69431
PT-69419-69420	GCGTCTACTCTGCTCTGGCT	59.921	20	CCTCATAGCCTTTCCAGCAG	59.971	20	263	69241	69503	AGCGTCTACTCTGCTCTGGC	59.921	20	CCTCATAGCCTTTCCAGCAG	59.971	20	264	69240	69503	GGCTTCTGGCTTCTCTTCCT	60.096	20	CCTCATAGCCTTTCCAGCAG	59.971	20	247	69257	69503
PT-69505-69505	CCTCTGCTGGAAAGGCTATG	59.971	20	TCATTGCCCTTTTCTCTTGG	60.184	20	214	69481	69694	CCTCTGCTGGAAAGGCTATG	59.971	20	CATTGCCCTTTTCTCTTGGA	60.184	20	213	69481	69693	CCTCTGCTGGAAAGGCTATG	59.971	20	GCTCGGGGTACTGTCTTTGA	60.255	20	281	69481	69761
PT-69573-69573	CTGCTGGAAAGGCTATGAGG	59.971	20	TCATTGCCCTTTTCTCTTGG	60.184	20	211	69484	69694	CTGCTGGAAAGGCTATGAGG	59.971	20	CATTGCCCTTTTCTCTTGGA	60.184	20	210	69484	69693	CCTCTGCTGGAAAGGCTATG	59.971	20	TCATTGCCCTTTTCTCTTGG	60.184	20	214	69481	69694
PT-74030-74032	TACTATGAGGGGTTCCGGTG	59.807	20	TTTCAATTCCTCTCGGGTTG	60.044	20	193	73903	74095	TACTATGAGGGGTTCCGGTG	59.807	20	CTTTCAAAGAGCGGATCTGG	59.948	20	168	73903	74070	TTGGTGCCGTTGTTAGAGTG	59.758	20	TTTCAATTCCTCTCGGGTTG	60.044	20	276	73820	74095
PT-74150-74155	CAACCCGAGAGGAATTGAAA	60.044	20	GATTGGTTCACGCACCTTCT	60.119	20	216	74076	74291	GCTTCAGTGCCTCTGTCTCC	60.143	20	GATTGGTTCACGCACCTTCT	60.119	20	270	74022	74291	GGCTTCAGTGCCTCTGTCTC	60.143	20	GATTGGTTCACGCACCTTCT	60.119	20	271	74021	74291
PT-74194-74194	CAACCCGAGAGGAATTGAAA	60.044	20	GATTGGTTCACGCACCTTCT	60.119	20	216	74076	74291	GCTTCAGTGCCTCTGTCTCC	60.143	20	GATTGGTTCACGCACCTTCT	60.119	20	270	74022	74291	GGCTTCAGTGCCTCTGTCTC	60.143	20	GATTGGTTCACGCACCTTCT	60.119	20	271	74021	74291
PT-74394-74394	AGAAGGTGCGTGAACCAATC	60.119	20	GAAGGAATGCCCTCTTAGGC	60.173	20	186	74272	74457	AGAAGGTGCGTGAACCAATC	60.119	20	TGCAGTGAATGAAGGAATGC	59.805	20	196	74272	74467	CTGCGCTGGTAGTGAAGTGA	60.199	20	GAAGGAATGCCCTCTTAGGC	60.173	20	212	74246	74457
PT-74509-74509	CGAATAGGGCTGTTAGCGAG	59.996	20	TCGCCCGCAGTTAGTTAGTT	59.904	20	188	74385	74572	CGAATAGGGCTGTTAGCGAG	59.996	20	TCTTAGTATCGCCCGCAGTT	59.867	20	196	74385	74580	CGAATAGGGCTGTTAGCGAG	59.996	20	GCTGCCCTTTCGAATATGAG	59.807	20	264	74385	74648
PT-74587-74608	AACTAACTAACTGCGGGCGA	59.904	20	CTCGGGATAGAGCACTCTGG	59.966	20	150	74553	74702	CGAATAGGGCTGTTAGCGAG	59.996	20	GCTGCCCTTTCGAATATGAG	59.807	20	264	74385	74648	AACTAACTAACTGCGGGCGA	59.904	20	GCCCTGAGCTCCCTTCTATT	59.811	20	277	74553	74829
PT-74832-74832	CCAGAGTGCTCTATCCCGAG	59.966	20	TCCTTGCGTCCTTGTATTCC	60.074	20	274	74683	74956	CCAGAGTGCTCTATCCCGAG	59.966	20	CGTCCTTGCGTCCTTGTATT	60.132	20	276	74683	74958	CCAGAGTGCTCTATCCCGAG	59.966	20	TCCGATTGTTCTTACCGAGC	60.214	20	257	74683	74939
PT-75107-75107	GGAGGACAAAGAAGAGCACG	59.989	20	AGTGATTTGGGGCACAGAAG	60.111	20	164	75035	75198	GGAGGACAAAGAAGAGCACG	59.989	20	AGAAGTGATTTGGGGCACAG	60.111	20	167	75035	75201	TGAGGGAGGAAATAGCCCTT	60.032	20	AGAAGTGATTTGGGGCACAG	60.111	20	210	74992	75201
PT-75294-75294	CTGTGCCCCAAATCACTTCT	60.111	20	TCTTATTTTGCTGGTTCCCG	60.067	20	196	75182	75377	CTTCTGTGCCCCAAATCACT	60.111	20	TCTTATTTTGCTGGTTCCCG	60.067	20	199	75179	75377	CTTCTGTGCCCCAAATCACT	60.111	20	GTTCCCGCCTAAGAAGAAGG	60.2	20	186	75179	75364
PT-75487-75492	CGGGAACCAGCAAAATAAGA	60.067	20	GTCCGTGGATTTGCTTGTCT	60.119	20	171	75358	75528	CGGGAACCAGCAAAATAAGA	60.067	20	AGTCCGTGGATTTGCTTGTC	60.119	20	172	75358	75529	CGGGAACCAGCAAAATAAGA	60.067	20	AACTCCAACAAGGTCGTGCT	59.769	20	300	75358	75657
PT-75652-75652	AGACAAGCAAATCCACGGAC	60.119	20	ATGGGATTGAGTTTGATGGC	59.756	20	184	75509	75692	TGAAATGGGCTCAAAGGAAG	60.184	20	ATGGGATTGAGTTTGATGGC	59.756	20	202	75491	75692	ATGGGCTCAAAGGAAGACAA	59.67	20	ATGGGATTGAGTTTGATGGC	59.756	20	198	75495	75692
PT-75713-75722	TTGTTGGAGTTCAACCCTCC	59.943	20	ATTGGCTCAAAACCCCTTCT	59.94	20	239	75647	75885	CCTCCAGGTTAGCCATCAAA	60.066	20	ATTGGCTCAAAACCCCTTCT	59.94	20	224	75662	75885	TTGTTGGAGTTCAACCCTCC	59.943	20	TCTCACTTGGGCAAGGAATC	60.195	20	277	75647	75923
PT-75817-75817	TTGTTGGAGTTCAACCCTCC	59.943	20	ATTGGCTCAAAACCCCTTCT	59.94	20	239	75647	75885	CCTCCAGGTTAGCCATCAAA	60.066	20	ATTGGCTCAAAACCCCTTCT	59.94	20	224	75662	75885	TTGTTGGAGTTCAACCCTCC	59.943	20	TCTCACTTGGGCAAGGAATC	60.195	20	277	75647	75923
PT-75970-75970	AGAAGGGGTTTTGAGCCAAT	59.94	20	CTGAGAGGGATTCTCATGCC	59.761	20	252	75866	76117	AGAAGGGGTTTTGAGCCAAT	59.94	20	AGGCGTAATCTAGGCTTCCC	59.709	20	288	75866	76153	AGAAGGGGTTTTGAGCCAAT	59.94	20	GGCGTAATCTAGGCTTCCCT	59.709	20	287	75866	76152
PT-80200-80205	CACCGAGGAGCAATTACCAT	59.955	20	CATCTGTCATAATGCACCCG	59.948	20	213	80035	80247	TTCACCGAGGAGCAATTACC	60.074	20	CATCTGTCATAATGCACCCG	59.948	20	215	80033	80247	CACCGAGGAGCAATTACCAT	59.955	20	CGCATCTGTCATAATGCACC	60.104	20	215	80035	80249
PT-80671-80671	GGCAGAGCGTTTTTGATCTC	59.962	20	CGGCAGATGGGTCTAGAGAA	60.353	20	259	80632	80890	CTCTCTAGACCCAACCACGG	59.715	20	CAAGGAGGATCCGTTGAAGA	60.187	20	186	80575	80760	CTCTCTAGACCCAACCACGG	59.715	20	TCAAGGAGGATCCGTTGAAG	60.187	20	187	80575	80761
PT-81525-81530	CTTGCTCGGTGATCAGTCAA	59.984	20	ATACGCGTGAGCCTAGGAGA	60	20	278	81494	81771	CTTGCTCGGTGATCAGTCAA	59.984	20	GATACGCGTGAGCCTAGGAG	60	20	279	81494	81772	CTTGCTCGGTGATCAGTCAA	59.984	20	TACGCGTGAGCCTAGGAGAT	60	20	277	81494	81770
PT-81779-81784	TCTCCTAGGCTCACGCGTAT	60	20	TCAGACTCGAAGGAAGGGAA	59.92	20	160	81752	81911	ATTATGCGCCAAAGAAGGAA	59.682	20	AGTCCTAAGCCTGAGAGGGC	59.979	20	272	81615	81886	ATTATGCGCCAAAGAAGGAA	59.682	20	GTCCTAAGCCTGAGAGGGCT	59.979	20	271	81615	81885
PT-81929-81929	AGCCCTCTCAGGCTTAGGAC	59.979	20	ATGGCGGCTACAAATAATGC	59.956	20	192	81866	82057	TTCCCTTCCTTCGAGTCTGA	59.92	20	ATGGCGGCTACAAATAATGC	59.956	20	166	81892	82057	GCTTAGGACTTCCCATTCCC	59.903	20	ATGGCGGCTACAAATAATGC	59.956	20	181	81877	82057
PT-83595-83595	AGGCACCAGCTTGAAGAGAG	59.745	20	GGTCTTTTCGGTCTATGGCA	60.074	20	266	83452	83717	GGCACCAGCTTGAAGAGAGT	59.604	20	GGTCTTTTCGGTCTATGGCA	60.074	20	265	83453	83717	AGGCACCAGCTTGAAGAGAG	59.745	20	GGCAAACTTTCCAATTGCTC	59.691	20	250	83452	83701
PT-85026-85050	ACGGATTGAAGTGCGTTTTC	60.118	20	TAATTGTGAACGAAGCAGCG	60.014	20	266	84937	85202	ACGGATTGAAGTGCGTTTTC	60.118	20	TCCATCCAATCACCATAGCA	59.883	20	150	84937	85086	AAGTGCGTTTTCGGGATAGA	59.708	20	TAATTGTGAACGAAGCAGCG	60.014	20	258	84945	85202
PT-85935-85935	CACTTCTGGCAGTCAGACCA	60.022	20	AAAGCCATAATGCCCTCCTT	59.93	20	230	85737	85966	CCAAGGAATCGAACCCTGTA	59.926	20	AAAGCCATAATGCCCTCCTT	59.93	20	275	85692	85966	AACTCTGCCATTGAACCCAG	60.111	20	AAAGCCATAATGCCCTCCTT	59.93	20	256	85711	85966
PT-86739-86744	CCCCTAAGGGTTAGTCCTCG	59.949	20	AAACTGGTGAGGATCCATGC	59.934	20	270	86500	86769	CCCCTAAGGGTTAGTCCTCG	59.949	20	AGCCCAATTAAGCGGAAGTT	60.095	20	300	86500	86799	CCCTAAGGGTTAGTCCTCGC	60.089	20	AAACTGGTGAGGATCCATGC	59.934	20	269	86501	86769
PT-86978-86978	GCTGTTCAGTTCAGCATGGA	59.992	20	CTTGGAGCAGTGTTGGTTGA	59.873	20	266	86737	87002	GCATGGATCCTCACCAGTTT	59.934	20	CTTGGAGCAGTGTTGGTTGA	59.873	20	253	86750	87002	AACTTCCGCTTAATTGGGCT	60.095	20	CTTGGAGCAGTGTTGGTTGA	59.873	20	223	86780	87002
PT-87040-87040	TGCTCCAAGTAGCAGAGCAA	59.888	20	GGCTGATCAGGAAAAGTCCA	60.195	20	276	86994	87269	TGCTCCAAGTAGCAGAGCAA	59.888	20	TGGCTGATCAGGAAAAGTCC	60.195	20	277	86994	87270	TCAACCAACACTGCTCCAAG	59.873	20	GGCTGATCAGGAAAAGTCCA	60.195	20	287	86983	87269
PT-87121-87121	TGCTCCAAGTAGCAGAGCAA	59.888	20	GGCTGATCAGGAAAAGTCCA	60.195	20	276	86994	87269	TGCTCCAAGTAGCAGAGCAA	59.888	20	TGGCTGATCAGGAAAAGTCC	60.195	20	277	86994	87270	TCAACCAACACTGCTCCAAG	59.873	20	GGCTGATCAGGAAAAGTCCA	60.195	20	287	86983	87269
PT-87309-87314	GTTCCTCCCTCTCCTGTGGT	60.504	20	GCTTCTTGGGTGGTGTCACT	60.159	20	248	87158	87405	GTTCCTCCCTCTCCTGTGGT	60.504	20	TGTCAATCGATGCTTCTTGG	59.799	20	259	87158	87416	TAGCGCTCCAACCAAATCAT	60.606	20	TGTCAGTCACTCGTTGGGAG	59.864	20	300	87284	87583
PT-87630-87635	CTACGCTCTGGCTTGGATTC	59.978	20	GCTCACCAACTTATCTGCCC	59.7	20	157	87596	87752	CTACGCTCTGGCTTGGATTC	59.978	20	GGCTCACCAACTTATCTGCC	59.7	20	158	87596	87753	AGAAGCTACGCTCTGGCTTG	59.92	20	GCTCACCAACTTATCTGCCC	59.7	20	162	87591	87752
PT-88631-88631	TGGTAGAGGGGTGAGATTCG	60.065	20	CCAATGCACAGCTACGAGAA	60.011	20	274	88497	88770	TGGTAGAGGGGTGAGATTCG	60.065	20	TTCCAATGCACAGCTACGAG	60.011	20	276	88497	88772	TGGTAGAGGGGTGAGATTCG	60.065	20	AGATGCGAGTCCATACCACC	59.957	20	170	88497	88666
PT-88792-88798	GGTGGTATGGACTCGCATCT	59.957	20	CCGCTCTCAAGGAAAGTGTC	59.989	20	229	88647	88875	AGGTGGTATGGACTCGCATC	59.957	20	CCGCTCTCAAGGAAAGTGTC	59.989	20	230	88646	88875	TTCTCGTAGCTGTGCATTGG	60.011	20	AGGAAGGGAGGACGAGATGT	60.073	20	275	88751	89025
PT-90868-90872	GCTGGCATAAATCGAAGGAG	59.807	20	AGACTAAAGGCCCTACCCCC	60.675	20	277	90697	90973	CAATAAGGGGCTTTGCTTTG	59.715	20	TGAAGCACAGGAAAGGAACA	59.415	20	201	90802	91002	CAATAAGGGGCTTTGCTTTG	59.715	20	AGACTAAAGGCCCTACCCCC	60.675	20	172	90802	90973
PT-93668-93668	TACAAATTCTGGGGGTTCCA	60.162	20	TATTCCATGCCCCAAGACTC	59.894	20	294	93489	93782	TACAAATTCTGGGGGTTCCA	60.162	20	ATTGTATTCCATGCCCCAAG	59.645	20	298	93489	93786	TACAAATTCTGGGGGTTCCA	60.162	20	TCCCATGCCTTTCTTGGTTA	60.439	20	276	93489	93764
PT-93909-93914	GAGTCTTGGGGCATGGAATA	59.894	20	CAGCTTAATCAAGCCTTCCG	59.975	20	297	93763	94059	GTACGAGACACGACCGATGA	59.707	20	CAGCTTAATCAAGCCTTCCG	59.975	20	191	93869	94059	TACGAGACACGACCGATGAC	59.707	20	CAGCTTAATCAAGCCTTCCG	59.975	20	190	93870	94059
PT-97028-97034	GTATTGATCGAAGCGGGTGT	59.962	20	TGCGTTCGAGAAAAGAACCT	59.993	20	190	96950	97139	GAGTTCCCCAACTGATCGAA	60.05	20	TGCGTTCGAGAAAAGAACCT	59.993	20	167	96973	97139	TCCTATCCGAGCAAGCCTAA	59.938	20	TGCGTTCGAGAAAAGAACCT	59.993	20	238	96902	97139
PT-97146-97147	GTATTGATCGAAGCGGGTGT	59.962	20	GGTTGGGTACTCAATGTGCC	60.24	20	253	96950	97202	GAGTTCCCCAACTGATCGAA	60.05	20	GGTTGGGTACTCAATGTGCC	60.24	20	230	96973	97202	GTGAGGGATTGAAAGCAAGC	59.82	20	GGTTGGGTACTCAATGTGCC	60.24	20	179	97024	97202
PT-99632-99637	TTCTATCAAGGGCGTAACGG	60.089	20	TAAACAGGGTCTTCGATGGG	59.926	20	244	99488	99731	CTTCCGACGCCCACTTATTA	60.089	20	TCCCTGCCAACATATGACAA	59.924	20	234	99464	99697	TTCTATCAAGGGCGTAACGG	60.089	20	TCCCTGCCAACATATGACAA	59.924	20	210	99488	99697
PT-100639-100639	GCTCCTGATCCCGATGATAA	59.998	20	TGTTGCTAACAGTGGGATGG	59.566	20	270	100409	100678	CGAAGCTCCTAAGCTCCTGA	59.853	20	TGTTGCTAACAGTGGGATGG	59.566	20	282	100397	100678	TCGAAGCTCCTAAGCTCCTG	59.853	20	TGTTGCTAACAGTGGGATGG	59.566	20	283	100396	100678
PT-101209-101214	TTCGAGCCGGAATAGAGAGA	60.051	20	GACTTGCCTTTCTGACGGAG	59.989	20	245	101077	101321	TTCGAGCCGGAATAGAGAGA	60.051	20	TGACGTGACTTGCCTTTCTG	60.025	20	251	101077	101327	TATCGGATCGGAAGTAACGG	59.916	20	GACTTGCCTTTCTGACGGAG	59.989	20	267	101055	101321
PT-101812-101817	GAGATAGGGCTCCTCCCATC	59.999	20	ATGGCAACGCAGGATAAAAG	60.096	20	287	101656	101942	CCATCTTATGCCCCTACCCT	60.166	20	ATGGCAACGCAGGATAAAAG	60.096	20	272	101671	101942	AGGGCTCCTCCCATCTTATG	60.422	20	ATGGCAACGCAGGATAAAAG	60.096	20	282	101661	101942
PT-105520-105525	ACATCCATCCGGATCCAATA	59.975	20	ATGGATAGTGCGGTAGTGGG	59.836	20	208	105491	105698	CATCCATCCGGATCCAATAC	59.975	20	GGCCACTGAGTCCTATCTCG	59.827	20	260	105492	105751	ACATCCATCCGGATCCAATA	59.975	20	GGCCACTGAGTCCTATCTCG	59.827	20	261	105491	105751
PT-105998-105998	ATTGCACCTTTTGACCCAAG	59.971	20	TAACTTCCCGAAGCTGATCG	60.344	20	250	105793	106042	TTTGACCCAAGGAAGACGAC	60.088	20	TAACTTCCCGAAGCTGATCG	60.344	20	241	105802	106042	CTTTTGACCCAAGGAAGACG	59.705	20	TAACTTCCCGAAGCTGATCG	60.344	20	243	105800	106042
PT-106313-106313	TTTCCTCGTCGAGACAAAGC	60.517	20	CTCTTCGGAGGTGAAAGTCG	59.982	20	150	106276	106425	TTTCCTCGTCGAGACAAAGC	60.517	20	CCCAAAATACCTGGTCATGG	60.044	20	268	106276	106543	TCCTCGTCGAGACAAAGCAT	60.945	20	CCCAAAATACCTGGTCATGG	60.044	20	266	106278	106543
PT-109145-109150	TGCATTCCCATCAAGTTCAA	60.049	20	GATTGTTTTTCCTGCTTGCC	59.691	20	263	108943	109205	CGCCTGTTTTCTGCCTAAAG	60.011	20	GCCCACCTCTTCAGAAGCTA	59.574	20	284	108905	109188	TGCATTCCCATCAAGTTCAA	60.049	20	GCCCACCTCTTCAGAAGCTA	59.574	20	246	108943	109188
PT-110861-110861	GCCGTCCTCTGAAGTGAGTC	59.993	20	GCTGAAGACAGGAAAGTGGC	59.997	20	260	110779	111038	ATAAACTCGCCGTCCTCTGA	59.836	20	GCTGAAGACAGGAAAGTGGC	59.997	20	268	110771	111038	TCAATAAACTCGCCGTCCTC	60.214	20	GCTGAAGACAGGAAAGTGGC	59.997	20	271	110768	111038
PT-112560-112560	TCCTCGGTCAGGTAATCTCG	60.21	20	ATGGGCTAGTGCAAACCATC	59.962	20	279	112458	112736	CTCGTTCCTCGGTCAGGTAA	60.246	20	ATGGGCTAGTGCAAACCATC	59.962	20	284	112453	112736	TCCTCGGTCAGGTAATCTCG	60.21	20	AACCATCCCTGTGGTTGAAG	59.82	20	266	112458	112723
PT-112780-112786	TCATAACTCGGGATGGAAGC	60.036	20	ACTAAGGGGGATTGGGATTG	60.011	20	162	112743	112904	GATGGTTTGCACTAGCCCAT	59.962	20	ACTAAGGGGGATTGGGATTG	60.011	20	188	112717	112904	TCATAACTCGGGATGGAAGC	60.036	20	GACTATCAGCGACATGCCAA	59.83	20	201	112743	112943
PT-113208-113216	ATGCGGCAATCTATGAAACC	59.929	20	GTAGTCTTCTGGCGTGCTCC	60.02	20	233	113152	113384	GAAGACGGCACTTCCGAATA	60.214	20	GTAGTCTTCTGGCGTGCTCC	60.02	20	201	113184	113384	ACGATGCGAGGATCAATAGG	60.059	20	CGAGGCAGGTTTTCATTCTC	59.813	20	233	113055	113287
PT-115463-115468	GGTCTGCCAGCTCTTAGTGG	60.012	20	ACCGTTCTCGCTCAGTGTTT	59.914	20	221	115273	115493	CGATAGGCTTCGCTTCTACG	60.131	20	TTCATTCTCTATTTGGCCCG	60.031	20	251	115434	115684	CGATAGGCTTCGCTTCTACG	60.131	20	TCGCATTCCTAATCCGGTAG	60.053	20	152	115434	115585
PT-121106-121106	GCTGAACACCGTGATTGATG	60.12	20	ATTTCGGCTATGACCAATGC	59.929	20	296	120840	121135	TGATGAGTGGGTAGGTGGGT	60.238	20	ATTTCGGCTATGACCAATGC	59.929	20	281	120855	121135	ACCGTGATTGATGAGTGGGT	60.246	20	ATTTCGGCTATGACCAATGC	59.929	20	289	120847	121135
PT-121338-121344	TCCTTTTGTTTGTGCTTCCA	59.293	20	ATGATGCTAAACCGAGACCG	60.096	20	284	121302	121585	TCCTTTTGTTTGTGCTTCCA	59.293	20	ATGCTAAACCGAGACCGAGA	59.836	20	281	121302	121582	TCCTTTTGTTTGTGCTTCCA	59.293	20	GATGCTAAACCGAGACCGAG	59.836	20	282	121302	121583
PT-121607-121607	GGGCAGCCCTCTCTCTCTAT	59.942	20	CGGGCCCGTAAAAATAAAAT	60.037	20	175	121544	121718	CGGTCTCGGTTTAGCATCAT	60.096	20	CGGGCCCGTAAAAATAAAAT	60.037	20	153	121566	121718	CTCGGTCTCGGTTTAGCATC	59.836	20	CGGGCCCGTAAAAATAAAAT	60.037	20	155	121564	121718
PT-123302-123308	TGAGCAACATCCAACAGCTC	59.992	20	CAATGCAAGAGGTCGGAAAT	60.074	20	254	123254	123507	ACGCAGAGCTTTTTGGTTGT	59.92	20	CAATGCAAGAGGTCGGAAAT	60.074	20	290	123218	123507	TGAGCAACATCCAACAGCTC	59.992	20	TAATGCAATGCAAGAGGTCG	59.833	20	259	123254	123512
PT-123865-123865	AGGAAGACTTTGGCGATTCA	59.813	20	GCCTGGCGAGTAGTTGTTTT	59.383	20	180	123803	123982	GGAAGACTTTGGCGATTCAT	59.129	20	GCCTGGCGAGTAGTTGTTTT	59.383	20	179	123804	123982	TTCGGATCTGATTGGAACAA	59.049	20	GCCTGGCGAGTAGTTGTTTT	59.383	20	209	123774	123982
PT-123989-123990	GCCCCAGGACATAAAATATGAA	60.042	22	GGTGCTCTGACCGATTGAAC	60.667	20	275	123853	124127	GCCCCAGGACATAAAATATGA	58.774	21	GGTGCTCTGACCGATTGAAC	60.667	20	275	123853	124127	TCTATGCCCCAGGACATAAAAT	59.701	22	GGTGCTCTGACCGATTGAAC	60.667	20	280	123848	124127
PT-124076-124076	GCCAGGCGGTTACCTTTT	60.074	18	AAATAAAGATCCCCCGTTGG	60.013	20	290	123976	124265	GCCAGGCGGTTACCTTTT	60.074	18	CTGTCCCCCTTTTCACAGAA	60.081	20	253	123976	124228	TACTCGCCAGGCGGTTAC	59.823	18	AAATAAAGATCCCCCGTTGG	60.013	20	295	123971	124265
PT-124684-124689	GGCTTACCCCATTGGAAAAT	60.02	20	TGCTTTTTGATCGTGCGTAG	60.014	20	154	124617	124770	GACATCTGGAGGGAGTTGGA	60.048	20	TGCTTTTTGATCGTGCGTAG	60.014	20	235	124536	124770	GGCTTACCCCATTGGAAAAT	60.02	20	GTGCTTTTTGATCGTGCGTA	59.879	20	155	124617	124771
PT-126038-126056	CGAAGTGAAGGAGCGAGAAC	60.134	20	ATGGATCGTCCAACTGGAAA	60.317	20	259	125918	126176	ACGAAGTGAAGGAGCGAGAA	60.134	20	GGATCGTCCAACTGGAAATG	60.317	20	258	125917	126174	ACGAAGTGAAGGAGCGAGAA	60.134	20	ATGGATCGTCCAACTGGAAA	60.317	20	260	125917	126176
PT-126179-126179	TTTTGCACAGGGTTCTTCAA	59.293	20	AGCTCAAGATCAGGAGCCAA	60.096	20	264	126041	126304	TTTTGCACAGGGTTCTTCAA	59.293	20	GACTCCACAAGCCTGAGGTC	59.841	20	294	126041	126334	AAAGATTCCGAGCACGTCTG	60.397	20	CGACAGCCAAAAATGGAAAG	60.608	20	265	125959	126223
PT-127479-127479	GTGTACTGATCGATCCGCCT	60.104	20	AGCAGGACAAGCGTAGGAAA	60.015	20	289	127415	127703	GTGTACTGATCGATCCGCCT	60.104	20	TCACAGCAGGACAAGCGTAG	60.199	20	293	127415	127707	CGATCCGCCTTTAGTATTGG	59.564	20	AGCAGGACAAGCGTAGGAAA	60.015	20	279	127425	127703
PT-129290-129290	AAAGACGTTAGCTGCTCCCA	60.015	20	AAAGGGACAGGTCATTGCAG	60.111	20	164	129194	129357	CAAAGACGTTAGCTGCTCCC	60.015	20	AAAGGGACAGGTCATTGCAG	60.111	20	165	129193	129357	TCTGTTACTTGGTGCAAGCG	60.05	20	GGCAGTAAAGGGACAGGTCA	60.111	20	261	129103	129363
PT-130048-130048	TTGCTCTTTTCCCCCTTTTT	60.048	20	TGCCGCAGATGACTACTTTG	60.011	20	261	129823	130083	TGCCCTTCTCCCTCGTAGTA	59.83	20	TGCCGCAGATGACTACTTTG	60.011	20	284	129800	130083	AGTAGCTTCCCGTCCTTGCT	60.403	20	TGCCGCAGATGACTACTTTG	60.011	20	232	129852	130083
PT-130249-130249	ACCTTCTGAAGCGAGACCAA	59.989	20	AACCTCGGAGTTGAAAGGGT	59.972	20	246	130191	130436	CCTTCTGAAGCGAGACCAAC	59.989	20	AACCTCGGAGTTGAAAGGGT	59.972	20	245	130192	130436	CTTCTGAAGCGAGACCAACC	59.989	20	AACCTCGGAGTTGAAAGGGT	59.972	20	244	130193	130436
PT-130684-130684	TTTATCCCAGGCCTGTCTTG	60.066	20	TTATAAGGCCCGTCTTGTGG	59.953	20	270	130464	130733	CAGGGTCGGAAAACCATAGA	59.926	20	TTATAAGGCCCGTCTTGTGG	59.953	20	246	130488	130733	TTTATCCCAGGCCTGTCTTG	60.066	20	TCTGATGGATCTGTTGAGCG	59.942	20	290	130464	130753
PT-131359-131376	GGTTCATGCCTGGGCTAATA	59.923	20	GGCGAATGAATCGCATTAGT	60.067	20	294	131212	131505	AAAGGCTTGGCTTTGTTTCA	59.861	20	GGCGAATGAATCGCATTAGT	60.067	20	234	131272	131505	AAAGGCTTGGCTTTGTTTCA	59.861	20	GTCGCCCTAGCCCTAGTCTT	59.87	20	287	131272	131558
PT-132043-132043	GAAGCTGGCTCATTCATGCT	60.514	20	TTGGGGAGGAGACAAAACAC	59.943	20	157	131953	132109	TGTTGAGGTCGCAAGTCTGT	59.467	20	TTGGGGAGGAGACAAAACAC	59.943	20	203	131907	132109	GAAGCTGGCTCATTCATGCT	60.514	20	CTTGGGGAGGAGACAAAACA	60.081	20	158	131953	132110
PT-132288-132294	GGCGATCCCTGTCTTGTTTA	60.074	20	CGTCAGGCTAACTTGGGTGT	60.171	20	289	132127	132415	CCAGCTAGCTTTTCTCCGTG	60.147	20	CGTCAGGCTAACTTGGGTGT	60.171	20	268	132148	132415	CAGCTAGCTTTTCTCCGTGG	60.147	20	CGTCAGGCTAACTTGGGTGT	60.171	20	267	132149	132415
PT-132335-132335	GGCGATCCCTGTCTTGTTTA	60.074	20	CGTCAGGCTAACTTGGGTGT	60.171	20	289	132127	132415	CCAGCTAGCTTTTCTCCGTG	60.147	20	CGTCAGGCTAACTTGGGTGT	60.171	20	268	132148	132415	CAGCTAGCTTTTCTCCGTGG	60.147	20	CGTCAGGCTAACTTGGGTGT	60.171	20	267	132149	132415
PT-132840-132845	TTGCCATCTCTTATGACCCC	59.894	20	AGAAGGGCTGACTTGGTTGA	59.844	20	269	132698	132966	TTCCACATGACAGCACCATT	59.967	20	GGCTGACTTGGTTGAAGTCC	59.703	20	282	132680	132961	CAATTCCACATGACAGCACC	59.967	20	GGCTGACTTGGTTGAAGTCC	59.703	20	285	132677	132961
PT-133292-133292	TTGGGCTAGACTTTGGTTGG	60.103	20	GCTCTTGGACGGGTAGTTGA	60.255	20	189	133133	133321	ACTTTGGTTGGGCAATGGTA	60.227	20	GCTCTTGGACGGGTAGTTGA	60.255	20	180	133142	133321	ACAGAGAGACTTTCCGGCAG	59.598	20	GCTCTTGGACGGGTAGTTGA	60.255	20	212	133110	133321
PT-133347-133349	TTGGGCTAGACTTTGGTTGG	60.103	20	CGATCGAGCGACAACTTCTA	59.174	20	278	133133	133410	GTCCAAGAGCATTTGGCTTC	59.82	20	CGCGAAGAGCTAAGCCACTA	60.802	20	186	133312	133497	TTGGGCTAGACTTTGGTTGG	60.103	20	TTTCGATCGAGCGACAACTT	60.914	20	281	133133	133413
PT-133584-133597	GTCGCTCGATCGAAAGGATA	60.318	20	CCATCAAGAGAAAGGAGGCA	60.331	20	239	133399	133637	GTCGCTCGATCGAAAGGATA	60.318	20	TGGAGCTCGGGTATTGTTTT	59.569	20	262	133399	133660	GTCGCTCGATCGAAAGGATA	60.318	20	TCCATCAAGAGAAAGGAGGC	59.361	20	240	133399	133638
PT-134651-134651	ATAGTTTCCGGTGCGAAATG	59.96	20	TATGCCCTATACCCACCCAA	60.031	20	273	134585	134857	GAATAGTTTCCGGTGCGAAA	60.074	20	TATGCCCTATACCCACCCAA	60.031	20	275	134583	134857	ATAGTTTCCGGTGCGAAATG	59.96	20	GCCCTATACCCACCCAATTT	59.909	20	270	134585	134854
PT-135720-135725	AAGGAGAGAGCAAGCAGCAG	60.035	20	ACAGTTACCGGATCCCCTCT	59.817	20	278	135519	135796	AAGGAGAGAGCAAGCAGCAG	60.035	20	AACAGTTACCGGATCCCCTC	60.19	20	279	135519	135797	CCACAACCTAGGAGGGGTTT	60.218	20	GTCTATTCTGCACTCCCCCA	60.073	20	278	135605	135882
PT-136151-136157	AACGTCAGCAGAAAGGAGGA	59.989	20	TTGGTCTGATTCGATAGGGC	60.036	20	181	136028	136208	AACGTCAGCAGAAAGGAGGA	59.989	20	TGCCCTTTTTGGTCTGATTC	60.051	20	189	136028	136216	GATGCTGGGAGTTCGGATAA	60.036	20	GTCAACCGGTGTTCTCCCTA	59.966	20	292	136108	136399
PT-136456-136462	TCGAATCAGACCAAAAAGGG	60.044	20	ATGGACTCTTCCACCACGTC	59.969	20	297	136195	136491	GAATCAGACCAAAAAGGGCA	60.051	20	ATGGACTCTTCCACCACGTC	59.969	20	295	136197	136491	TAGGGAGAACACCGGTTGAC	59.966	20	TTAAAGCTACGGCATCCCAC	60.096	20	185	136380	136564
PT-136800-136801	TGCAACACTCTTCCGACTTG	60.025	20	CACTTGACGTCGGATCTCCT	60.261	20	175	136652	136826	AGCTTTAAGAGAGAGGGGCG	60.11	20	CACTTGACGTCGGATCTCCT	60.261	20	270	136557	136826	AAGTACCGGCTGGATTACCC	60.208	20	GAGCTAGTCAAGCAGGCGTT	59.786	20	200	136691	136890
PT-137166-137166	AAAACTTTCGGAGACGGGAT	59.94	20	ACCTGGTTCCATCTGTCCTG	59.962	20	151	137107	137257	AAAACTTTCGGAGACGGGAT	59.94	20	CTCACCCTCCTTCCAATCAA	60.042	20	242	137107	137348	GAGTAAGGGGGTTTTCTGGG	59.799	20	TGAATGAGGGAATTAAGGCG	60.031	20	180	137060	137239
PT-138576-138582	ATGTCCACCCCTATTCCCTC	60.015	20	ACTGTATCTGCCGCAGGTCT	59.898	20	292	138425	138716	GATGTCCACCCCTATTCCCT	60.015	20	ACTGTATCTGCCGCAGGTCT	59.898	20	293	138424	138716	AGATGTCCACCCCTATTCCC	60.015	20	ACTGTATCTGCCGCAGGTCT	59.898	20	294	138423	138716
PT-138973-138979	TTTCTAGTGGATTGGAGCGG	60.206	20	CCCCGATAGTAGCGATCAAA	60.053	20	189	138866	139054	CTTCGCTATCCCATGCAAGT	60.235	20	CCCCGATAGTAGCGATCAAA	60.053	20	169	138886	139054	CTGCCATGAGACAGACAAGC	59.577	20	CCCCGATAGTAGCGATCAAA	60.053	20	284	138771	139054
PT-139450-139451	CAGCCCGGTATTACCAGAAA	59.953	20	CCCCGCCCTATAGAATGAAT	60.13	20	203	139326	139528	CAGCCCGGTATTACCAGAAA	59.953	20	TAAGCCCTTTTGCTGGATTG	60.202	20	234	139326	139559	ATCTGCCGCCGCTAGTATAA	59.859	20	CCCCGCCCTATAGAATGAAT	60.13	20	286	139243	139528
PT-139745-139745	ACCAACAATCCAGCAAAAGG	59.971	20	CGGCGAAATCTATTTGTGGT	59.96	20	259	139535	139793	ACCAACAATCCAGCAAAAGG	59.971	20	ACTCTATCCAATCCATGCGG	59.917	20	276	139535	139810	ATTCATTCTATAGGGCGGGG	60.13	20	CGGCGAAATCTATTTGTGGT	59.96	20	285	139509	139793
PT-140377-140383	GGGTGAGCGGTGGTTAGATA	59.955	20	AATGGTCGCAGGTTCAAGTC	60.119	20	285	140303	140587	AATATGTGATCGGGGTGAGC	59.78	20	AATGGTCGCAGGTTCAAGTC	60.119	20	297	140291	140587	GGAGTTAGGAGGAGGGAACG	60.067	20	GATAGCGAATCCCGAACTTG	59.668	20	282	140138	140419
PT-140530-140535	GGGTGAGCGGTGGTTAGATA	59.955	20	AATGGTCGCAGGTTCAAGTC	60.119	20	285	140303	140587	CCTTGTCACTTAAAGGGCGA	60.241	20	CTTTTCCGCACCAATCCTTA	60.067	20	224	140446	140669	AATATGTGATCGGGGTGAGC	59.78	20	AATGGTCGCAGGTTCAAGTC	60.119	20	297	140291	140587
PT-142274-142275	GGTCGATAGTTGGCAAGGAA	60.074	20	CTGAGCGATTTCGATCACCT	60.362	20	191	142240	142430	AAGGAGGCCTTGCCATAGTT	60.096	20	CTGAGCGATTTCGATCACCT	60.362	20	287	142144	142430	GGTCGATAGTTGGCAAGGAA	60.074	20	CCTCACTGACCTGAGCGATT	60.408	20	201	142240	142440
PT-142785-142786	CCTCTCTTCCGCTACTGGTG	60.005	20	AGGCCAGCGTGAAACTAAGA	60.015	20	294	142608	142901	CTCTCTTCCGCTACTGGTGG	60.005	20	AGGCCAGCGTGAAACTAAGA	60.015	20	293	142609	142901	AGCCAAGAAGGTACGAACGA	59.875	20	AGGCCAGCGTGAAACTAAGA	60.015	20	159	142743	142901
PT-147106-147111	GCGAGCTGAGGTATTTGAGG	59.978	20	TGGACCCTAGAGGCAGAAAA	59.807	20	300	147075	147374	ATTGCCCAACAGCAAGTTTC	60.118	20	GTAGTGCAAGCGCTACGACA	60.225	20	211	146945	147155	CGAGCTGAGGTATTTGAGGG	59.83	20	TGGACCCTAGAGGCAGAAAA	59.807	20	299	147076	147374
PT-147208-147217	GCGAGCTGAGGTATTTGAGG	59.978	20	TGGACCCTAGAGGCAGAAAA	59.807	20	300	147075	147374	CGAGCTGAGGTATTTGAGGG	59.83	20	TGGACCCTAGAGGCAGAAAA	59.807	20	299	147076	147374	GCGAGCTGAGGTATTTGAGG	59.978	20	TTGGGATAGGTGCAGTCCTT	59.55	20	182	147075	147256
PT-151171-151177	GCTACGAGCTGAGGTTGGTC	60.02	20	AGGCCGAGTGCTTGCTATAA	60.003	20	283	150958	151240	GCTACGAGCTGAGGTTGGTC	60.02	20	TAAGGCCGAGTGCTTGCTAT	60.003	20	285	150958	151242	GCTACGAGCTGAGGTTGGTC	60.02	20	GGCCGAGTGCTTGCTATAAG	60.003	20	282	150958	151239
PT-151295-151295	TTATAGCAAGCACTCGGCCT	60.003	20	GCGCTTATGTCCTGTGTGAA	59.871	20	158	151221	151378	ATAGCAAGCACTCGGCCTTA	60.003	20	GCGCTTATGTCCTGTGTGAA	59.871	20	156	151223	151378	TATAGCAAGCACTCGGCCTT	60.003	20	GCGCTTATGTCCTGTGTGAA	59.871	20	157	151222	151378
PT-151563-151568	GAGCTCGAACGTGGGATTTA	60.214	20	GGGCCTCTATAACGCCTTTC	60.061	20	300	151425	151724	GCGCTCTTGGTGGGTTAATA	60.096	20	GATTTCCGGTTTCCGTTTCT	60.299	20	220	151375	151594	ATCTTTCCTCCTTCAACCCG	60.434	20	GGGCCTCTATAACGCCTTTC	60.061	20	257	151468	151724
PT-151826-151832	AGGCGTTATAGAGGCCCAGT	60.117	20	TCGACCCAACTTGAAACTCC	60.088	20	167	151708	151874	AGGCGTTATAGAGGCCCAGT	60.117	20	GGCCAATCCTCTGTCTTGAA	60.195	20	204	151708	151911	TGTCAGACTCTGCTGAGGGA	59.685	20	GGGATCCGAAAGAGAGGTTC	60.015	20	300	151784	152083
PT-152723-152724	TCAACCTTCCCTTTTGTTGG	59.942	20	CATCTGCTCAGTATGCCCCT	60.24	20	256	152618	152873	TGGGACAAGTAAAGAAGGCG	60.241	20	GGACCAGCAGAAGATGGGTA	60.073	20	231	152682	152912	TCAACCTTCCCTTTTGTTGG	59.942	20	TCTGCTCAGTATGCCCCTTC	60.362	20	254	152618	152871
PT-152811-152812	AGCTAGCGAAGCGACTCAAC	59.927	20	GGACCAGCAGAAGATGGGTA	60.073	20	204	152709	152912	TCAACCTTCCCTTTTGTTGG	59.942	20	CATCTGCTCAGTATGCCCCT	60.24	20	256	152618	152873	AGCTAGCGAAGCGACTCAAC	59.927	20	CATCTGCTCAGTATGCCCCT	60.24	20	165	152709	152873
PT-152910-152915	AGCTAGCGAAGCGACTCAAC	59.927	20	GCTCATCCTTTGGTTTTTGC	59.691	20	252	152709	152960	GAAGGGGCATACTGAGCAGA	60.362	20	AAACCATGCCGCAGAATTAG	60.096	20	292	152852	153143	TGGGACAAGTAAAGAAGGCG	60.241	20	GCTCATCCTTTGGTTTTTGC	59.691	20	279	152682	152960
PT-153305-153311	TAAGCCAGGGAAAGCCCTAT	60.055	20	CGCTTCTTCCCCTTCTCTTT	59.955	20	169	153237	153405	AAGGAACCTAAGCCAGGGAA	60.068	20	CGCTTCTTCCCCTTCTCTTT	59.955	20	177	153229	153405	AGGAACCTAAGCCAGGGAAA	60.068	20	CGCTTCTTCCCCTTCTCTTT	59.955	20	176	153230	153405
PT-153621-153621	AAAGAGAAGGGGAAGAAGCG	59.955	20	AGCGGAGAATAGGGTGGAAC	60.464	20	260	153386	153645	TATTCACCGGGATACAAGGC	59.784	20	AGCGGAGAATAGGGTGGAAC	60.464	20	156	153490	153645	AAAGAGAAGGGGAAGAAGCG	59.955	20	TAGAGCGGAGAATAGGGTGG	59.288	20	263	153386	153648
PT-154070-154075	GCCTTGACAGTAGCCTTTGC	60.022	20	AGATCTCCAAATCCCCCATC	60.096	20	293	154018	154310	GCCTTGACAGTAGCCTTTGC	60.022	20	GAGATCTCCAAATCCCCCAT	60.096	20	294	154018	154311	GCCTTGACAGTAGCCTTTGC	60.022	20	CTGGGCGTACACTTCGTCTT	60.312	20	259	154018	154276
PT-154114-154145	GCCTTGACAGTAGCCTTTGC	60.022	20	AGATCTCCAAATCCCCCATC	60.096	20	293	154018	154310	GCCTTGACAGTAGCCTTTGC	60.022	20	GAGATCTCCAAATCCCCCAT	60.096	20	294	154018	154311	GCCTTGACAGTAGCCTTTGC	60.022	20	CTGGGCGTACACTTCGTCTT	60.312	20	259	154018	154276
PT-154180-154180	GCCTTGACAGTAGCCTTTGC	60.022	20	AGATCTCCAAATCCCCCATC	60.096	20	293	154018	154310	GCCTTGACAGTAGCCTTTGC	60.022	20	GAGATCTCCAAATCCCCCAT	60.096	20	294	154018	154311	GCCTTGACAGTAGCCTTTGC	60.022	20	CTGGGCGTACACTTCGTCTT	60.312	20	259	154018	154276
PT-154233-154233	GCCTTGACAGTAGCCTTTGC	60.022	20	AGATCTCCAAATCCCCCATC	60.096	20	293	154018	154310	GCCTTGACAGTAGCCTTTGC	60.022	20	GAGATCTCCAAATCCCCCAT	60.096	20	294	154018	154311	GCCTTGACAGTAGCCTTTGC	60.022	20	CTGGGCGTACACTTCGTCTT	60.312	20	259	154018	154276
PT-155525-155525	GTTTCCCATGTTGGTATGGC	60.059	20	CGACGCTCTTTCCCTATCTG	59.971	20	271	155339	155609	GGTTTCCCATGTTGGTATGG	59.91	20	CGACGCTCTTTCCCTATCTG	59.971	20	272	155338	155609	GTTTCCCATGTTGGTATGGC	60.059	20	ATCTCGAGCTTCATTTCCGA	59.917	20	291	155339	155629
PT-155814-155820	ATCCCCCGGAACAATAGAAG	60.145	20	TTGAGTTTGCTATCGGGCTT	59.845	20	197	155703	155899	AAAGAAAGGAGTCAACCGCA	59.853	20	TTGAGTTTGCTATCGGGCTT	59.845	20	238	155662	155899	ATCCCCCGGAACAATAGAAG	60.145	20	TTTGCTATCGGGCTTGATTC	60.175	20	192	155703	155894
PT-156087-156087	AAGCCCGATAGCAAACTCAA	59.845	20	ACTTCACGAGCTGCCTTTGT	60.058	20	283	155880	156162	TCGCTTACAGGTGCTAGGGT	59.898	20	GCAGCCTGCTCTTATTCTGG	60.118	20	300	156054	156353	GAATCAAGCCCGATAGCAAA	60.175	20	ACTTCACGAGCTGCCTTTGT	60.058	20	288	155875	156162
PT-158292-158297	CCACTTCATACTAGGGGGCA	59.948	20	AAAGCGCTCCACCTGAGTTA	60.015	20	244	158215	158458	CCACTTCATACTAGGGGGCA	59.948	20	GCGCTCCACCTGAGTTAGAC	60.02	20	241	158215	158455	ACAGGTGCTTTTGTGGCTCT	59.914	20	GAAGCTCTTCAAATGCCAGG	59.955	20	249	158086	158334
PT-160957-160962	AACACAAGTCCAATCCCAGC	59.973	20	CAGTCCTATCGGGAAGGTCA	60.065	20	251	160872	161122	AACACAAGTCCAATCCCAGC	59.973	20	CTATCGCCGATCTCTTAGCG	60.096	20	161	160872	161032	TAAGCTCGTGGATTCCCATC	60.036	20	CTATCGCCGATCTCTTAGCG	60.096	20	295	160738	161032
PT-161308-161313	TGACCTTCCCGATAGGACTG	60.065	20	GCAAACCAACCGTTCATTCT	59.978	20	271	161103	161373	TGACCTTCCCGATAGGACTG	60.065	20	CCGAATCCTCATTGGGAGTA	59.887	20	237	161103	161339	GTGGGAGAGCATAGTTTGCC	59.7	20	GCAAACCAACCGTTCATTCT	59.978	20	199	161175	161373
PT-161510-161510	AGAATGAACGGTTGGTTTGC	59.978	20	ATAACGGACATGCCTCATCC	59.78	20	246	161354	161599	CCCAATGAGGATTCGGTAGA	59.887	20	ATAACGGACATGCCTCATCC	59.78	20	276	161324	161599	TCCCAATGAGGATTCGGTAG	59.887	20	ATAACGGACATGCCTCATCC	59.78	20	277	161323	161599
PT-162388-162393	ATACGCTGGGAGATGACCAC	59.957	20	AAATCCCCATAACCTCCGTC	60.017	20	258	162364	162621	ACCATACGCTGGGAGATGAC	59.957	20	AAATCCCCATAACCTCCGTC	60.017	20	261	162361	162621	ACTGACCTCATCCAAGCAGG	60.261	20	AAATCCCCATAACCTCCGTC	60.017	20	287	162335	162621
PT-164425-164430	CAAATCAAGCCAAGCAGACA	59.988	20	TTCCAGGCTTGAAAGCAGTT	59.993	20	230	164343	164572	TCAAATTCTTTTGGCTCGCT	59.96	20	TTCCAGGCTTGAAAGCAGTT	59.993	20	205	164368	164572	TCAAGCCAAGCAGACAGAGA	59.855	20	TTCCAGGCTTGAAAGCAGTT	59.993	20	226	164347	164572
PT-187755-187755	CCGTTGCTTGTTCCGTATCT	60.132	20	CAAAATGGGGAAGCTCAAAA	60.046	20	267	187598	187864	CCGTTGCTTGTTCCGTATCT	60.132	20	CCAGACGCTAACCTTTTTGC	59.883	20	228	187598	187825	ACGGACCAAATCCTTCCTTC	60.306	20	CGAAGTCATGTGGCAGCTTA	60.011	20	245	187656	187900
PT-190397-190417	CGACTGAAAGGGAATCGTGT	60.111	20	AGGGCAGGGAAAGCTAACTC	59.848	20	154	190363	190516	CGACTGAAAGGGAATCGTGT	60.111	20	CACTTGACGAGCTAACAGCG	59.805	20	234	190363	190596	CGACTGAAAGGGAATCGTGT	60.111	20	AAAGGGCAGGGAAAGCTAAC	59.725	20	156	190363	190518
PT-190510-190529	GCCTTCCCCTATGGAGTTTC	59.903	20	GGGCAGTTCAAGACCGATTA	60.074	20	277	190420	190696	GCCTTCCCCTATGGAGTTTC	59.903	20	CACTTGACGAGCTAACAGCG	59.805	20	177	190420	190596	CGACTGAAAGGGAATCGTGT	60.111	20	CACTTGACGAGCTAACAGCG	59.805	20	234	190363	190596
PT-191062-191062	GCTTAAAGGCAAGAGCATGG	59.982	20	TGGCTGCGTACCATATACCA	59.976	20	226	190912	191137	TAGGTTGTTCCTCCGTGTCC	59.966	20	TGGCTGCGTACCATATACCA	59.976	20	162	190976	191137	GGTTGTTCCTCCGTGTCCTA	59.966	20	TGGCTGCGTACCATATACCA	59.976	20	160	190978	191137
PT-191132-191132	GGTTGTTCCTCCGTGTCCTA	59.966	20	TGGCATAGCTGAAGCTCCTT	60.118	20	300	190978	191277	AGCGGAGAAGCGTAAGTCAA	60.154	20	GCTCCTTTTCAGGACGACTG	59.989	20	206	191059	191264	GCGGAGAAGCGTAAGTCAAG	60.154	20	GCTCCTTTTCAGGACGACTG	59.989	20	205	191060	191264
PT-191369-191369	GCTTCCGTTGGACATTCTGT	60.119	20	AAAGCCTCACTCTCGGTGAA	59.989	20	293	191338	191630	CCCTCCCTTAACAGGAAAGC	60.068	20	CAGAATAAGCCGATGCGAGT	60.374	20	283	191307	191589	CCCTCCCTTAACAGGAAAGC	60.068	20	ACAGAATAAGCCGATGCGAG	60.374	20	284	191307	191590
PT-191478-191485	GTCAGTGCGCTGTCGAAATA	60.019	20	AAAGCCTCACTCTCGGTGAA	59.989	20	219	191412	191630	GTCAGTGCGCTGTCGAAATA	60.019	20	TTCAATTACCGTGGGAAAGC	59.938	20	234	191412	191645	GTCAGTGCGCTGTCGAAATA	60.019	20	AGCTCTTTCCTCCAGCATGA	60.096	20	291	191412	191702
PT-191574-191589	GTCAGTGCGCTGTCGAAATA	60.019	20	AAAGCCTCACTCTCGGTGAA	59.989	20	219	191412	191630	GTCAGTGCGCTGTCGAAATA	60.019	20	TTCAATTACCGTGGGAAAGC	59.938	20	234	191412	191645	GTCAGTGCGCTGTCGAAATA	60.019	20	AGCTCTTTCCTCCAGCATGA	60.096	20	291	191412	191702
PT-191636-191642	GTCAGTGCGCTGTCGAAATA	60.019	20	AGCTCTTTCCTCCAGCATGA	60.096	20	291	191412	191702	TTCACCGAGAGTGAGGCTTT	59.989	20	GCGCTAAGTGGAGGATGAAC	59.843	20	271	191611	191881	TTCACCGAGAGTGAGGCTTT	59.989	20	CTTTCCGATGACTGTGACGA	59.831	20	224	191611	191834
PT-191679-191679	GCTTTCCCACGGTAATTGAA	59.938	20	AGCGCTAAGTGGAGGATGAA	59.978	20	257	191626	191882	GCTTTCCCACGGTAATTGAA	59.938	20	AAGCGCTAAGTGGAGGATGA	59.978	20	258	191626	191883	GTCAGTGCGCTGTCGAAATA	60.019	20	AGCTCTTTCCTCCAGCATGA	60.096	20	291	191412	191702
PT-191793-191799	GCTTTCCCACGGTAATTGAA	59.938	20	AGCGCTAAGTGGAGGATGAA	59.978	20	257	191626	191882	GCTTTCCCACGGTAATTGAA	59.938	20	AAGCGCTAAGTGGAGGATGA	59.978	20	258	191626	191883	TTCACCGAGAGTGAGGCTTT	59.989	20	GCGCTAAGTGGAGGATGAAC	59.843	20	271	191611	191881
PT-192779-192779	AGGAGTTCCCTAGCCCTTCA	60.204	20	TCAGCAATCGACGTAACAGG	59.864	20	221	192654	192874	AGGAGTTCCCTAGCCCTTCA	60.204	20	CAGGTTCAGCAATCGACGTA	59.864	20	226	192654	192879	CCGATCGACCCTAACTCTCA	60.21	20	TCAGCAATCGACGTAACAGG	59.864	20	263	192612	192874
PT-192975-192975	TTGGCTCTGGCTTGTCCTAT	59.836	20	CTGCAGCAAAGGGGTCTTAG	60.008	20	261	192902	193162	GTTGGCTCTGGCTTGTCCTA	60.397	20	CTGCAGCAAAGGGGTCTTAG	60.008	20	262	192901	193162	CCTGTTACGTCGATTGCTGA	59.864	20	GGTCTATTGCTTGACGGGAG	59.694	20	289	192855	193143
PT-193661-193661	GGAAATAGGCCATCCTCTCC	59.866	20	GGTCGGCTCTCTCACTCATC	59.952	20	289	193556	193844	GGAAATAGGCCATCCTCTCC	59.866	20	CAAGAGAAGAGGGCAAGCAG	60.269	20	204	193556	193759	TCTCGCCAATGAATTTCCTC	60.155	20	CAAGAGAAGAGGGCAAGCAG	60.269	20	288	193472	193759
PT-195335-195341	ACAAGAGAACTCCCCCGAAT	59.935	20	GCTTCCCCTACTTCCTGAGC	60.349	20	295	195075	195369	TAACTAGAACCCGGAACCGA	59.564	20	GCAACTGCTGGGTTAGCTTC	60.022	20	216	195169	195384	AGAGATCTTGTCCTGCTCGG	59.555	20	GCAACTGCTGGGTTAGCTTC	60.022	20	290	195095	195384
PT-199811-199817	ACCGACCTTTGAGATCGAGA	59.803	20	GACCTACTCCCCTTCCTTGG	59.928	20	268	199661	199928	GACCGACCTTTGAGATCGAG	59.803	20	GACCTACTCCCCTTCCTTGG	59.928	20	269	199660	199928	GTTAGATCGAATGTGCCGCT	60.243	20	GACCTACTCCCCTTCCTTGG	59.928	20	220	199709	199928
PT-201156-201157	GATCACCAGGCAGCTCTTTC	59.957	20	TTTCTTTCCTCCCGGCTATT	60.034	20	184	201123	201306	CTATGTTGAATGTGCGACCG	60.134	20	GGTTGCCGGTGCTATAGGTA	59.982	20	251	201001	201251	TGAGTCCGAACGCTATGTTG	59.864	20	GGTTGCCGGTGCTATAGGTA	59.982	20	263	200989	201251
PT-201501-201506	AATAGCCGGGAGGAAAGAAA	60.034	20	CAGGTGCCGTAGGTAAGCTC	59.898	20	275	201287	201561	TACCTATAGCACCGGCAACC	59.982	20	AGCATTGATTCCCCATAACG	59.784	20	298	201232	201529	AATAGCCGGGAGGAAAGAAA	60.034	20	AGCATTGATTCCCCATAACG	59.784	20	243	201287	201529
PT-201878-201883	GCTACACTCCCACTCCAAGC	59.874	20	GACCGATCACTAAGTGGGGA	59.927	20	286	201647	201932	GATGCATTGCGATTTCCTCT	60.185	20	GACCGATCACTAAGTGGGGA	59.927	20	250	201683	201932	AGATGCATTGCGATTTCCTC	60.185	20	GACCGATCACTAAGTGGGGA	59.927	20	251	201682	201932
PT-203877-203883	CCCATGGTCTGCTTTGATTT	59.933	20	ACCAAGTCACAATGGCAACA	60.008	20	213	203842	204054	GACACCCGTCGCATTAGTTT	60	20	ATATGAGGACGTGCTGGAGG	60.096	20	276	203718	203993	ACACCCGTCGCATTAGTTTC	60	20	ATATGAGGACGTGCTGGAGG	60.096	20	275	203719	203993
PT-205568-205569	CAGTGCCTGGAGACTGAACA	60.022	20	GGCTTTGAAGATTGCTTTCG	59.96	20	232	205411	205642	CAGTGCCTGGAGACTGAACA	60.022	20	AGCCAAAAACTGGCTTTGAA	59.861	20	243	205411	205653	CAGTGCCTGGAGACTGAACA	60.022	20	AAGCCAAAAACTGGCTTTGA	59.861	20	244	205411	205654
PT-206121-206121	AAGCAAGACCTAACAGCGGA	60.015	20	TGACTTTGCAATTCAGCCAC	59.847	20	224	206061	206284	AAGCAAGACCTAACAGCGGA	60.015	20	CTTTCAACGAAGACTTCCCG	59.846	20	155	206061	206215	CCATCCGGACTGAGAAGAAG	59.797	20	TCCTAGCCTGCCAACTCCTA	59.971	20	234	205936	206169
PT-207762-207764	TTTGTTTGTCCTTTCCCTCG	60.081	20	GTCCTTCAGCAGCCAACTTC	59.997	20	270	207667	207936	TTTGTTTGTCCTTTCCCTCG	60.081	20	TTCAGCAGCCAACTTCAATG	59.988	20	266	207667	207932	TTTGTTTGTCCTTTCCCTCG	60.081	20	TCTGTACGGACCTTAACCCG	59.986	20	244	207667	207910
PT-208365-208371	TCATTACTCCTGCCCCTGAG	60.21	20	CACTTTCAACCGACAAAGCA	59.881	20	268	208278	208545	GGTGGGGAGTAGGAGGAATC	59.755	20	CACTTTCAACCGACAAAGCA	59.881	20	296	208250	208545	GGACTTCCATTCTCTGCTGC	59.957	20	AAAGCAAGGAAAGTCCGCTT	60.373	20	274	208125	208398
PT-210003-210008	TTCCAGATTCGACGATAGGG	60.029	20	CTCTTCTGAAGCCATACCGC	59.978	20	278	209832	210109	TTCCAGATTCGACGATAGGG	60.029	20	TCTGGTAAACGGTCGGAATC	59.933	20	245	209832	210076	TTCCAGATTCGACGATAGGG	60.029	20	CTTCTGGTAAACGGTCGGAA	60.103	20	247	209832	210078
PT-211412-211412	ATCCTCCATAACCGCATCTG	59.917	20	TACACCCATCTTCAAAGCCC	59.933	20	256	211361	211616	ATCCTCCATAACCGCATCTG	59.917	20	CCCGTCCCAATGTTGATAAG	60.184	20	239	211361	211599	CCGAATCAGAATCATCAGCA	59.756	20	GGAAGAGGCTGATCTGTTGC	59.957	20	264	211188	211451
PT-211913-211920	TTTTATGCTAGCAGGGGTGG	60.089	20	CCTATAGCAATGCCGCTCTC	59.967	20	224	211794	212017	TTTTATGCTAGCAGGGGTGG	60.089	20	CTATAGCAATGCCGCTCTCC	59.967	20	223	211794	212016	TTTTATGCTAGCAGGGGTGG	60.089	20	TATAGCAATGCCGCTCTCCT	59.967	20	222	211794	212015
PT-212385-212385	ATAGTCGGCTAACGAAGCCA	59.867	20	TCGCTGACAAGTCCTTTCCT	59.989	20	159	212335	212493	ATAGTCGGCTAACGAAGCCA	59.867	20	TTCGTGTGCTTTTATCGCTG	60.014	20	173	212335	212507	ATAGTCGGCTAACGAAGCCA	59.867	20	CTCATTCATCACGGTTGACG	60.112	20	270	212335	212604
PT-212963-212969	GTGGCATGATCAGAGCAGAA	59.95	20	CCTATTTCCCCAAAAGAGGC	59.903	20	298	212869	213166	GTGGCATGATCAGAGCAGAA	59.95	20	TAGCGGGAAAACCAGTCAAC	60.11	20	249	212869	213117	GTCCGGTCAGTCAGGAGAAG	59.835	20	GTGTTGTCTCGCCTATGGGT	59.997	20	293	212907	213199
PT-213697-213697	TCCCTCTCGATTTCGTTCAC	60.195	20	AGTATAGAGCAGGCAGCCCA	60	20	209	213558	213766	CTAGCATCCATGCTCTTCCC	59.797	20	AGTATAGAGCAGGCAGCCCA	60	20	225	213542	213766	GCTAGCATCCATGCTCTTCC	59.946	20	TATAGAGCAGGCAGCCCATT	59.829	20	224	213541	213764
PT-215441-215441	TCCAGAGCATCCGTATAGGC	60.199	20	AGTTTTCAATCATCCGGCAC	59.939	20	264	215364	215627	TCCAGAGCATCCGTATAGGC	60.199	20	GTTTTCAATCATCCGGCACT	59.939	20	263	215364	215626	TAATGGCTTGTCCCGTTAGG	59.953	20	ATCGAGAAATTGGGGGAGTT	59.766	20	300	215228	215527
PT-215525-215530	TCCAGAGCATCCGTATAGGC	60.199	20	AGTTTTCAATCATCCGGCAC	59.939	20	264	215364	215627	TCCAGAGCATCCGTATAGGC	60.199	20	GTTTTCAATCATCCGGCACT	59.939	20	263	215364	215626	TCCAGAGCATCCGTATAGGC	60.199	20	GGTCTTCACCCTTCCAGTGA	60.088	20	207	215364	215570
PT-216308-216322	TGTAGGCATCGCTCTTTCCT	59.978	20	CTCTCGGAGCCTACCCTTTC	60.34	20	209	216265	216473	TGTAGGCATCGCTCTTTCCT	59.978	20	CCAAATCCAAAACTGGGGTA	59.657	20	177	216265	216441	GCATCGCTCTTTCCTTTGTC	59.962	20	CTCTCGGAGCCTACCCTTTC	60.34	20	204	216270	216473
PT-216590-216641	GGGTACCCCAGTTTTGGATT	59.919	20	GCGGTTATCTCTGTCCTTCG	59.836	20	247	216419	216665	TCTCAAAGCGCCCATTATCT	59.807	20	GCGGTTATCTCTGTCCTTCG	59.836	20	288	216378	216665	CTCTCAAAGCGCCCATTATC	59.807	20	GCGGTTATCTCTGTCCTTCG	59.836	20	289	216377	216665
PT-216863-216869	GTTGAACGGGAGGATTCAGA	60.05	20	GTTGGGCTGTACCTTCCTCA	60.111	20	237	216781	217017	GTTGAACGGGAGGATTCAGA	60.05	20	TTGGGCTGTACCTTCCTCAG	60.246	20	236	216781	217016	GTTGAACGGGAGGATTCAGA	60.05	20	GGCTGTACCTTCCTCAGGTG	59.721	20	233	216781	217013
PT-216937-216939	GTTGAACGGGAGGATTCAGA	60.05	20	GTTGGGCTGTACCTTCCTCA	60.111	20	237	216781	217017	GTTGAACGGGAGGATTCAGA	60.05	20	TTGGGCTGTACCTTCCTCAG	60.246	20	236	216781	217016	GACGATAAACGCCGAAAAGA	60.209	20	GTTGGGCTGTACCTTCCTCA	60.111	20	176	216842	217017
PT-217656-217656	GTTCTGCTGCATCACAAGGA	59.992	20	CTCTTCGGAGCTGTAATGCC	59.978	20	217	217525	217741	GTTCTGCTGCATCACAAGGA	59.992	20	GCTCTTCGGAGCTGTAATGC	60.125	20	218	217525	217742	TTCTGCTGCATCACAAGGAG	60.136	20	CTCTTCGGAGCTGTAATGCC	59.978	20	216	217526	217741
PT-219760-219765	CCATTGCGATTGAAAAGGTT	59.938	20	GGGCGGGAGGTAGAGAATAG	60.053	20	172	219672	219843	CCATTGCGATTGAAAAGGTT	59.938	20	AGCCTTTTGGAGGGGTAAGA	60.068	20	278	219672	219949	TGAGGCGAGAAACAAAACCT	59.853	20	GGGCGGGAGGTAGAGAATAG	60.053	20	296	219548	219843
PT-220091-220123	ACAGCAAGCAGGACTGGACT	60.057	20	CGGGGATTTGCTCTCAGTTA	60.206	20	279	220004	220282	GCAGGACTGGACTAACCAGC	59.874	20	CGGGGATTTGCTCTCAGTTA	60.206	20	272	220011	220282	ACAGCAAGCAGGACTGGACT	60.057	20	CTCTAAAAGGCGGGAAGGTT	59.72	20	188	220004	220191
PT-222615-222615	CAACGTTCCCCCTAGTCGTA	59.986	20	AATGGGAGCTGGATTGACTG	60.073	20	211	222457	222667	CAGAGAAAGATGCTCCGTCC	59.95	20	CTCGGGCATGATTGGATAGT	59.917	20	261	222579	222839	AGAGAAAGATGCTCCGTCCA	59.95	20	CTCGGGCATGATTGGATAGT	59.917	20	260	222580	222839
PT-223299-223304	CCCAGTAGCGTCTCGTAAGC	60.037	20	AATATGCCGCTCTCCTCTGA	59.939	20	276	223212	223487	CCGCCTTAACTAATAGGGGC	59.95	20	AATATGCCGCTCTCCTCTGA	59.939	20	242	223246	223487	GCCGCCTTAACTAATAGGGG	59.95	20	AATATGCCGCTCTCCTCTGA	59.939	20	243	223245	223487
PT-224124-224130	GGGGAAACAAGAAAGAAGGC	60.053	20	CGTCCCAGGTAGCTTGTCTC	59.867	20	248	223927	224174	CCATGAATGGCCGTTAAATC	60.153	20	CGTCCCAGGTAGCTTGTCTC	59.867	20	199	223976	224174	CCATGAATGGCCGTTAAATC	60.153	20	AAGCTCCGGGTTGCTCTATT	60.228	20	288	223976	224263
PT-224815-224815	CCTTATCTCTCGGCAAGGCT	60.856	20	GGCAGCTATCGAAGAGCGTA	60.647	20	197	224791	224987	CCTTATCTCTCGGCAAGGC	59.925	19	GGCAGCTATCGAAGAGCGTA	60.647	20	197	224791	224987	CCCTTATCTCTCGGCAAGG	59.776	19	GGCAGCTATCGAAGAGCGTA	60.647	20	198	224790	224987
PT-225165-225165	CTAAATCTGCGTCTGCTCCC	59.978	20	AATCTCTTGATGGAATGCGG	60.036	20	236	225139	225374	CCTAAATCTGCGTCTGCTCC	59.978	20	AATCTCTTGATGGAATGCGG	60.036	20	237	225138	225374	CCTAAATCTGCGTCTGCTCC	59.978	20	TCCAACAAAATGGGCTTCTC	60.051	20	162	225138	225299
PT-225236-225238	CTAAATCTGCGTCTGCTCCC	59.978	20	AATCTCTTGATGGAATGCGG	60.036	20	236	225139	225374	CCTAAATCTGCGTCTGCTCC	59.978	20	AATCTCTTGATGGAATGCGG	60.036	20	237	225138	225374	CCTAAATCTGCGTCTGCTCC	59.978	20	TCCAACAAAATGGGCTTCTC	60.051	20	162	225138	225299
PT-225459-225468	GTACGGACTGCTCTTCCTGC	60.02	20	TCTCTCGGATCTCTCGGAAA	60.027	20	279	225433	225711	CCGCATTCCATCAAGAGATT	60.036	20	CGTCAAGCTAGGCCTGAAAC	60.015	20	150	225355	225504	GAGAAGCCCATTTTGTTGGA	60.051	20	CGTCAAGCTAGGCCTGAAAC	60.015	20	225	225280	225504
PT-225593-225647	GTTTCAGGCCTAGCTTGACG	60.015	20	TCTCTCGGATCTCTCGGAAA	60.027	20	227	225485	225711	GTACGGACTGCTCTTCCTGC	60.02	20	TCTCTCGGATCTCTCGGAAA	60.027	20	279	225433	225711	GGTACGGACTGCTCTTCCTG	59.867	20	TCTCTCGGATCTCTCGGAAA	60.027	20	280	225432	225711
PT-225756-225782	TTTCCGAGAGATCCGAGAGA	60.027	20	ATTGTGCAAAGAGGCGATTC	60.221	20	195	225692	225886	TGGTGCACTATCCTTCTCCC	60.073	20	CTTCCCCTTTTTGGTTGGTT	60.193	20	283	225726	226008	GGTGCACTATCCTTCTCCCA	60.073	20	CTTCCCCTTTTTGGTTGGTT	60.193	20	282	225727	226008
PT-225832-225832	TTTCCGAGAGATCCGAGAGA	60.027	20	ATTGTGCAAAGAGGCGATTC	60.221	20	195	225692	225886	TGGTGCACTATCCTTCTCCC	60.073	20	CTTCCCCTTTTTGGTTGGTT	60.193	20	283	225726	226008	GGTGCACTATCCTTCTCCCA	60.073	20	CTTCCCCTTTTTGGTTGGTT	60.193	20	282	225727	226008
PT-225908-225909	TGGTGCACTATCCTTCTCCC	60.073	20	CTTCCCCTTTTTGGTTGGTT	60.193	20	283	225726	226008	GGTGCACTATCCTTCTCCCA	60.073	20	CTTCCCCTTTTTGGTTGGTT	60.193	20	282	225727	226008	TTTCCGAGAGATCCGAGAGA	60.027	20	AGGGGGCGTGGAACTACTAC	60.382	20	286	225692	225977
PT-225955-225955	TGGTGCACTATCCTTCTCCC	60.073	20	CTTCCCCTTTTTGGTTGGTT	60.193	20	283	225726	226008	GGTGCACTATCCTTCTCCCA	60.073	20	CTTCCCCTTTTTGGTTGGTT	60.193	20	282	225727	226008	GAATCGCCTCTTTGCACAAT	60.221	20	GATCATTTTCAGAAAGCGCC	59.791	20	161	225867	226027
PT-226017-226098	AACCAACCAAAAAGGGGAAG	60.193	20	TGGTTTTTCGATCCGATCTC	60.014	20	218	225989	226206	GTAGTAGTTCCACGCCCCCT	60.382	20	TGGTTTTTCGATCCGATCTC	60.014	20	249	225958	226206	AGTAGTAGTTCCACGCCCCC	60.382	20	TGGTTTTTCGATCCGATCTC	60.014	20	250	225957	226206
PT-226136-226136	AAGGCGCTTTCTGAAAATGA	59.96	20	TGGTTTTTCGATCCGATCTC	60.014	20	201	226006	226206	AAGGCGCTTTCTGAAAATGA	59.96	20	CACTTTTTGGCGATGGTTTT	59.975	20	214	226006	226219	AACCAACCAAAAAGGGGAAG	60.193	20	TGGTTTTTCGATCCGATCTC	60.014	20	218	225989	226206
PT-226278-226278	GAGATCGGATCGAAAAACCA	60.014	20	GAGGAGGGGGATTCTAGCAC	60.037	20	293	226187	226479	AAAACCATCGCCAAAAAGTG	59.975	20	GAGGAGGGGGATTCTAGCAC	60.037	20	280	226200	226479	GAGATCGGATCGAAAAACCA	60.014	20	ACCGGGTAAACAAAGTCACG	59.891	20	227	226187	226413
PT-226574-226582	GTGCTAGAATCCCCCTCCTC	60.037	20	CAGCGTGCTGTAGATTCTGG	59.615	20	249	226460	226708	TTAAGACGGCTACGGCTTGT	59.904	20	CAGCGTGCTGTAGATTCTGG	59.615	20	217	226492	226708	GTTAAGACGGCTACGGCTTG	59.904	20	CAGCGTGCTGTAGATTCTGG	59.615	20	218	226491	226708
PT-226643-226645	GTGCTAGAATCCCCCTCCTC	60.037	20	CAGCGTGCTGTAGATTCTGG	59.615	20	249	226460	226708	TTAAGACGGCTACGGCTTGT	59.904	20	CAGCGTGCTGTAGATTCTGG	59.615	20	217	226492	226708	GTTAAGACGGCTACGGCTTG	59.904	20	CAGCGTGCTGTAGATTCTGG	59.615	20	218	226491	226708
PT-227307-227314	GGTCTTTCGTTCGCTATTCG	59.845	20	TGGGTTCGTTAGGAATCGAC	59.933	20	175	227236	227410	AAAGACGGAGGAAATGGGAT	59.766	20	GGAGAGATCAACGACGAAGC	59.957	20	157	227193	227349	AAGACGGAGGAAATGGGATT	59.766	20	GGAGAGATCAACGACGAAGC	59.957	20	156	227194	227349
PT-228505-228510	CCCGAATAGACGAACAGGAA	60.066	20	GGTCGCCTGGTATCTTGAAA	60.074	20	220	228481	228700	CCCGAATAGACGAACAGGAA	60.066	20	CACTTGGTCGCCTGGTATCT	60.134	20	225	228481	228705	AGGTAAAACCGACCGAAACC	60.221	20	ACTTGTGGAAGAGGGGAGGT	59.968	20	280	228286	228565
PT-228814-228814	GGTTTCAAGATACCAGGCGA	60.074	20	TGTCATCACCTCATTGGTCG	60.534	20	184	228679	228862	TTTCAAGATACCAGGCGACC	60.074	20	GCATGCATGTGTCATCACCT	60.578	20	191	228681	228871	AGATACCAGGCGACCAAGTG	60.134	20	GCATGCATGTGTCATCACCT	60.578	20	186	228686	228871
PT-228958-228959	TTCCAAACCTAGGTGGCACT	59.592	20	GATAAAAACCACGCGGAATG	60.323	20	273	228898	229170	TTCCAAACCTAGGTGGCACT	59.592	20	GGCGAACCCTCGAGATACTT	60.599	20	198	228898	229095	CGACCAATGAGGTGATGACA	60.534	20	GGCGAACCCTCGAGATACTT	60.599	20	253	228843	229095
PT-229029-229029	TTCCAAACCTAGGTGGCACT	59.592	20	GATAAAAACCACGCGGAATG	60.323	20	273	228898	229170	TTCCAAACCTAGGTGGCACT	59.592	20	GGCGAACCCTCGAGATACTT	60.599	20	198	228898	229095	CGACCAATGAGGTGATGACA	60.534	20	GGCGAACCCTCGAGATACTT	60.599	20	253	228843	229095
PT-229961-229965	TAGGCCAGAAGCCAGAAAGA	60.088	20	CGTCATTCTGAGGAAGAGCC	59.95	20	246	229813	230058	TAGGCCAGAAGCCAGAAAGA	60.088	20	TTGGCCAACTTTCTTCATCC	60.051	20	293	229813	230105	GCCAGAAGCCAGAAAGACAG	60.134	20	CGTCATTCTGAGGAAGAGCC	59.95	20	243	229816	230058
PT-230072-230079	TAGGCCAGAAGCCAGAAAGA	60.088	20	TTGGCCAACTTTCTTCATCC	60.051	20	293	229813	230105	GCCAGAAGCCAGAAAGACAG	60.134	20	TTGGCCAACTTTCTTCATCC	60.051	20	290	229816	230105	AGTATTCGTCAACGATGGGG	59.813	20	TTGGCCAACTTTCTTCATCC	60.051	20	181	229925	230105
PT-230157-230185	TGTGTGAGTTGCTGGGGATA	60.112	20	CCACACTCTGACCGAAGACA	59.864	20	216	230060	230275	GACGATGTGTGAGTTGCTGG	60.319	20	CCACACTCTGACCGAAGACA	59.864	20	221	230055	230275	ATGTGTGAGTTGCTGGGGAT	60.395	20	CCACACTCTGACCGAAGACA	59.864	20	217	230059	230275
PT-236048-236050	GATGGCCTACCAAACGAAGA	60.074	20	AAAAAGAAGGCCGGGATAGA	60.034	20	295	235976	236270	GATGGCCTACCAAACGAAGA	60.074	20	AAGGCCGGGATAGATTCAGT	59.925	20	289	235976	236264	AAAACGGAAGGAGCAAGTCA	59.853	20	AAAAAGAAGGCCGGGATAGA	60.034	20	276	235995	236270
PT-237626-237631	CCAAGCTTTCGACAGTAGGC	60.015	20	GAGGAGGTGCCCTCTATTCC	60.037	20	208	237537	237744	CCAAGCTTTCGACAGTAGGC	60.015	20	GATTCAAGGCTTCGCTTTTG	59.96	20	287	237537	237823	CTTTGACCGGATTTGATGCT	60.074	20	GAGGAGGTGCCCTCTATTCC	60.037	20	268	237477	237744
PT-239774-239779	CGACACAGGGAGAACAACAA	59.72	20	GCAAAACTCTTTGTATGGGCA	60.124	21	295	239662	239956	CGACACAGGGAGAACAACAA	59.72	20	TCTATAAGCCCTCCTGCTTCC	59.828	21	173	239662	239834	TACTCGATGTGGGAGTGTGC	59.707	20	TCTATAAGCCCTCCTGCTTCC	59.828	21	205	239630	239834
PT-239918-239929	CGAACGTTTGAAAGGGCTAA	60.236	20	GCTGTGTTCGGTCGGTACTT	60.179	20	296	239866	240161	CGAACGTTTGAAAGGGCTAA	60.236	20	TTCGGTCGGTACTTTCCTGT	59.592	20	290	239866	240155	CGAACGTTTGAAAGGGCTAA	60.236	20	GTTCGGTCGGTACTTTCCTG	59.592	20	291	239866	240156
PT-240963-240963	ACAGGAAAGGTGATGTTGCC	59.973	20	AGACAACTGTCCGAACCCAC	60.009	20	156	240897	241052	ACAGGAAAGGTGATGTTGCC	59.973	20	CGCCGTTGAAGAAAGAAAAG	59.99	20	174	240897	241070	ACAGGAAAGGTGATGTTGCC	59.973	20	TCCTTATGCCTTTCCATTCG	60.031	20	192	240897	241088
PT-242204-242210	CCCTGGATGCTTTCTTTTGA	60.184	20	AGGGACGATGTTCCAACAAG	59.966	20	183	242125	242307	GGGGGTGTCAACAGTGAGTT	59.859	20	AGCGCTAAAGGAAAGAAGGC	60.116	20	279	241976	242254	ACAGTGAGTTTCACAGGGGC	60.159	20	AGCGCTAAAGGAAAGAAGGC	60.116	20	269	241986	242254
PT-244086-244092	CCTTCTCGGTGAAGCAAATC	59.813	20	GTATCTCCTCCCGGATTGGT	60.154	20	218	243999	244216	TCCTTCTCGGTGAAGCAAAT	59.813	20	GTATCTCCTCCCGGATTGGT	60.154	20	219	243998	244216	CCTTCCAGAACGGAGATTCA	60.187	20	GTATCTCCTCCCGGATTGGT	60.154	20	188	244029	244216
PT-244463-244468	CTTCTGCGGGATTCAGAGAG	60.088	20	TCATTGCTTTTGTGTGGGAA	60.088	20	257	244355	244611	TCTGCGGGATTCAGAGAGAT	59.91	20	TCATTGCTTTTGTGTGGGAA	60.088	20	255	244357	244611	CTTCTGCGGGATTCAGAGAG	60.088	20	CATTTCGTACCCTGATCGGT	59.813	20	285	244355	244639
PT-244534-244540	CTTCTGCGGGATTCAGAGAG	60.088	20	TCATTGCTTTTGTGTGGGAA	60.088	20	257	244355	244611	TCTGCGGGATTCAGAGAGAT	59.91	20	TCATTGCTTTTGTGTGGGAA	60.088	20	255	244357	244611	GCTAGTCACAACTAGCCGCC	60.044	20	CATTTCGTACCCTGATCGGT	59.813	20	161	244479	244639
PT-247503-247503	CGGACTTCTATGCCTTCCTG	59.83	20	CATTCCAAGCAGGAAATTGG	60.439	20	275	247265	247539	CGGACTTCTATGCCTTCCTG	59.83	20	CAGGAAATTGGGCGATAGTG	60.46	20	266	247265	247530	AAGGGATGGACATAGCAAGC	59.154	20	AGTCCAAGTTGCAACCATCC	59.973	20	231	247411	247641
PT-249797-249803	GGCCGTGGATTGAATAGAGA	60.036	20	AAGAGCCTCGCCTAAAGGAC	59.983	20	192	249734	249925	GGCCGTGGATTGAATAGAGA	60.036	20	ACAAGATCGAAAGCGCAACT	60.022	20	155	249734	249888	GGCCGTGGATTGAATAGAGA	60.036	20	TGGGCATGAACTGTAACCAA	59.964	20	273	249734	250006
PT-250553-250558	GCGTGTGTGTAATTCATGGC	60.003	20	TGACAACCCCACAACAAAGA	59.976	20	223	250497	250719	TTCCTCTAGCCGAGCCACTA	60.11	20	TGACAACCCCACAACAAAGA	59.976	20	246	250474	250719	GCCACTACTTGCGTGTGTGT	59.826	20	TGACAACCCCACAACAAAGA	59.976	20	233	250487	250719
PT-250868-250868	CCATTCCTTCCGGATAACCT	60.145	20	ATATCTTCCCACCTCCGGTC	60.154	20	297	250796	251092	CCATTCCTTCCGGATAACCT	60.145	20	CGGGATCCAGAGAAAGACAG	59.797	20	207	250796	251002	GGCCATACGGATAGGGAAGT	60.173	20	CGGGATCCAGAGAAAGACAG	59.797	20	273	250730	251002
PT-252150-252150	AAGGAAGAAAGAAGGAGCCG	59.955	20	CCAAAAAGTCAAGCCACCAT	59.971	20	267	252000	252266	GGAAAACCCGCTTTCTTACC	59.945	20	CCAAAAAGTCAAGCCACCAT	59.971	20	293	251974	252266	GGGAAAACCCGCTTTCTTAC	59.945	20	CCAAAAAGTCAAGCCACCAT	59.971	20	294	251973	252266
PT-252720-252720	GAACGAGACACAGGGGGTTA	59.966	20	TGAATCAAGAAGGGGTCAGC	60.195	20	230	252634	252863	TGAAGCATTTGAATTTCCCC	59.878	20	TGAATCAAGAAGGGGTCAGC	60.195	20	206	252658	252863	GAACGAGACACAGGGGGTTA	59.966	20	AGGAATTGACCAAGCAGGAA	59.67	20	299	252634	252932
PT-253936-253942	TCTCGCTTTCGCTCTTTCTC	59.978	20	ATTTATCCCCGGGTTCAGAC	60.017	20	284	253866	254149	TCTCGCTTTCGCTCTTTCTC	59.978	20	GTTCCGTTTGACCGAGATGT	59.973	20	215	253866	254080	TCTCGCTTTCGCTCTTTCTC	59.978	20	CCTGAATGCCATACCTTGCT	60.096	20	264	253866	254129
PT-254145-254145	ACATCTCGGTCAAACGGAAC	59.973	20	CCGGTTAGGTTGACTTTGGA	59.964	20	212	254061	254272	TATACCGAGAAGGTCACGGG	59.948	20	CCGGTTAGGTTGACTTTGGA	59.964	20	237	254036	254272	ACATCTCGGTCAAACGGAAC	59.973	20	TAAGGACCGGGTGAAGAATG	59.926	20	184	254061	254244
PT-254319-254324	GTCTGAACCCGGGGATAAAT	60.017	20	GCGATTCTGTTCATGCTTCA	59.955	20	269	254130	254398	CATTCTTCACCCGGTCCTTA	59.926	20	GCGATTCTGTTCATGCTTCA	59.955	20	174	254225	254398	TTTTCATTCTTCACCCGGTC	59.91	20	GCGATTCTGTTCATGCTTCA	59.955	20	178	254221	254398
PT-255176-255176	CACGTTGACTGCCTTCGATA	59.864	20	GAAGGGCGAGTTCCTTTCTT	59.827	20	207	255005	255211	ACGGCAAGCGAGATAAAGAA	59.982	20	GCCCATCTGGTTAGTTCAGC	59.7	20	283	255093	255375	AACGGCAAGCGAGATAAAGA	59.982	20	GCCCATCTGGTTAGTTCAGC	59.7	20	284	255092	255375
PT-255379-255384	CCTTCGACACCAAGGGATAA	59.926	20	GCAGCTGAAAAACGTAAGCC	60.025	20	295	255207	255501	CCTTCGACACCAAGGGATAA	59.926	20	CATTTTGTGATCCTCCGCTT	60.074	20	262	255207	255468	CCTTCGACACCAAGGGATAA	59.926	20	TAAGCCCCTTTTTGTGTTGC	60.11	20	281	255207	255487
PT-256116-256116	ATCTCAGGGCTGACACAACC	60.12	20	ATCCCCGACCCTAATGAATC	59.981	20	250	256085	256334	CAATCTCAGGGCTGACACAA	59.831	20	ATCCCCGACCCTAATGAATC	59.981	20	252	256083	256334	ATCTCAGGGCTGACACAACC	60.12	20	TTAGTGGGTGGGGTGGTAAA	60.081	20	158	256085	256242
PT-256562-256563	ACTGTAGCAAACCCTCCCCT	59.994	20	TGGGCGAGCTAGAATCCTTA	59.938	20	246	256495	256740	ACTGTAGCAAACCCTCCCCT	59.994	20	AAGCCCAGACCCATTCTTCT	60.074	20	168	256495	256662	GGAGGAGTTTTGAGCGTGAG	59.989	20	AAGCCCAGACCCATTCTTCT	60.074	20	249	256414	256662
PT-256829-256834	AGCGGCACTCGACATCTATT	59.866	20	GAGTACGCATCCAGTCAGCA	60.016	20	276	256774	257049	AAGCGGCACTCGACATCTAT	59.866	20	GAGTACGCATCCAGTCAGCA	60.016	20	277	256773	257049	TAAGGATTCTAGCTCGCCCA	59.938	20	ATTCGGTCAAAGTCTCCACG	60.111	20	236	256721	256956
PT-257376-257379	TATAGGGTTCCAAACCTGCG	59.953	20	GGCGTTAGCGCTTTAGTTTG	60.041	20	150	257335	257484	TATAGGGTTCCAAACCTGCG	59.953	20	AGCGCTAACGAGCAAGAGAG	60.059	20	188	257335	257522	ATCATCGAGAGGGACACCAC	59.928	20	GGCGTTAGCGCTTTAGTTTG	60.041	20	196	257289	257484
PT-257429-257429	TATAGGGTTCCAAACCTGCG	59.953	20	GGCGTTAGCGCTTTAGTTTG	60.041	20	150	257335	257484	TATAGGGTTCCAAACCTGCG	59.953	20	AGCGCTAACGAGCAAGAGAG	60.059	20	188	257335	257522	ATCATCGAGAGGGACACCAC	59.928	20	GGCGTTAGCGCTTTAGTTTG	60.041	20	196	257289	257484
PT-257766-257771	TAGTTCCAGCCTTTGTTGCC	60.249	20	TCTCGTTCTTTGGACCAACC	60.088	20	239	257692	257930	TAGTTCCAGCCTTTGTTGCC	60.249	20	CCGGGAGAAAGGGTTATGAT	60.145	20	176	257692	257867	TAGTTCCAGCCTTTGTTGCC	60.249	20	CCGACTCTCGTTCTTTGGAC	59.844	20	244	257692	257935
PT-258170-258170	CGCTTTTCTGACCTAGCGAC	60.154	20	GGAGACTAATTCCTTCCGGC	60.039	20	215	258039	258253	GGTTGGTCCAAAGAACGAGA	60.088	20	TCATTCCCAGTGGATCCTTC	59.862	20	294	257911	258204	CGCTTTTCTGACCTAGCGAC	60.154	20	TCATTCCCAGTGGATCCTTC	59.862	20	166	258039	258204
PT-260543-260548	GGATTGGATTCAGTCAGCGT	60.081	20	CACTTCAATTCAAGCGCAAA	59.992	20	220	260409	260628	GGCAAAGCTAAAGTGGTTCG	59.883	20	CACTTCAATTCAAGCGCAAA	59.992	20	299	260330	260628	TTGGATTCAGTCAGCGTCAC	59.837	20	CACTTCAATTCAAGCGCAAA	59.992	20	217	260412	260628
PT-261681-261687	TCTGAAGGGAACACGCTTTT	59.853	20	AGCTACATGGACCCCTTCCT	59.957	20	172	261652	261823	AAACCCACCCCCTATTTGAG	60.046	20	CGAAGGCTGCTATCCCAATA	60.188	20	282	261456	261737	AGGAAAACGCTTTCGGAGAT	60.208	20	AGCTACATGGACCCCTTCCT	59.957	20	255	261569	261823
PT-262784-262789	TCTATTTGTTCTTCGCCGCT	59.982	20	TGTCGCAACTGATTCGGTAA	60.257	20	176	262674	262849	TCTATTTGTTCTTCGCCGCT	59.982	20	GTGTCGCAACTGATTCGGTA	59.722	20	177	262674	262850	GTGGGGCTTACTTCCTAGCC	60.096	20	GTGTCGCAACTGATTCGGTA	59.722	20	150	262701	262850
PT-263112-263112	AAGATGAAGGGCCCAAAAGT	59.94	20	TTGATTTGGCCAGGAAAGAC	60.051	20	292	263077	263368	AAGATGAAGGGCCCAAAAGT	59.94	20	ATTCTTCATTGGACGGTTCG	59.933	20	151	263077	263227	AAGATGAAGGGCCCAAAAGT	59.94	20	CTTGATTTGGCCAGGAAAGA	60.184	20	293	263077	263369
PT-263830-263836	GGGGCTTCAATCCTTACTCC	59.903	20	TCCCGTGTTTGATCTCTTCC	60.05	20	200	263706	263905	GGGGGCTTCAATCCTTACTC	59.903	20	TCCCGTGTTTGATCTCTTCC	60.05	20	201	263705	263905	GGGGCTTCAATCCTTACTCC	59.903	20	TTGTCCACTTTCTCCATCCC	59.903	20	264	263706	263969
PT-264597-264603	GGTGGGCCATTGATAAAGAA	59.762	20	TGCTGCTTGATTGAACGAAC	59.995	20	220	264470	264689	GGTGGGCCATTGATAAAGAA	59.762	20	GCTGCTTGATTGAACGAACA	59.995	20	219	264470	264688	GGTGGGCCATTGATAAAGAA	59.762	20	TTCCGTTCATAGGTCCCAAG	59.926	20	290	264470	264759
PT-264677-264683	GGTGGGCCATTGATAAAGAA	59.762	20	TTCCGTTCATAGGTCCCAAG	59.926	20	290	264470	264759	GGTGGGCCATTGATAAAGAA	59.762	20	AGGTCCCAAGCCCTTCTTAG	59.707	20	280	264470	264749	GGTGGGCCATTGATAAAGAA	59.762	20	GTTCATAGGTCCCAAGCCCT	60.328	20	286	264470	264755
PT-265655-265660	AACATGATGGGCTTGCCTAC	59.962	20	ATGGTCAGGAAGTGGATTCG	59.927	20	256	265571	265826	AACATGATGGGCTTGCCTAC	59.962	20	TCACATGGTCAGGAAGTGGA	60.088	20	260	265571	265830	GCTGACCGGGTTATCTTTGA	60.074	20	ATGGTCAGGAAGTGGATTCG	59.927	20	292	265535	265826
PT-265926-265932	CGAATCCACTTCCTGACCAT	59.927	20	GTGCCGTAGACTGCTTGTCA	60.056	20	159	265807	265965	CGAATCCACTTCCTGACCAT	59.927	20	AGGTGCCGTAGACTGCTTGT	59.937	20	161	265807	265967	TCCACTTCCTGACCATGTGA	60.088	20	GTGCCGTAGACTGCTTGTCA	60.056	20	155	265811	265965
PT-267044-267044	AACTTGGTTGTGGCATCCTC	59.973	20	GGATACCAAGGATGGTCGTG	60.195	20	232	266887	267118	AACTTGGTTGTGGCATCCTC	59.973	20	GATACCAAGGATGGTCGTGG	60.195	20	231	266887	267117	AACTTGGTTGTGGCATCCTC	59.973	20	ATACCAAGGATGGTCGTGGA	60.195	20	230	266887	267116
PT-269254-269254	TGAGTTGATAGGGGCCTTTG	60.066	20	ATGCAAGACCCGTCGATAAG	60.096	20	289	269033	269321	TGAGTTGATAGGGGCCTTTG	60.066	20	CTAATGCAAGACCCGTCGAT	60.096	20	292	269033	269324	GATAGGGGCCTTTGGCTAAC	59.93	20	ATGCAAGACCCGTCGATAAG	60.096	20	283	269039	269321
PT-272546-272552	GTATGCTCCTCAGCTGCTCC	60.127	20	CGACCCACTCTAACTCCAGC	59.867	20	297	272427	272723	CCTCAGCTGCTCCTACCAAG	60.149	20	CGACCCACTCTAACTCCAGC	59.867	20	290	272434	272723	GTATGCTCCTCAGCTGCTCC	60.127	20	AAACCATTGGAAAATGCCAG	59.801	20	212	272427	272638
PT-274176-274183	ATCATTCAGTGGTGGGGTGT	60.096	20	ACCTCCAAGTTGTTGATCGG	59.966	20	197	274028	274224	TGACCGTGTGTTCTCTCCTG	59.864	20	ACCTCCAAGTTGTTGATCGG	59.966	20	248	273977	274224	CAACGAGTGGCAGATTTTGA	59.84	20	ACCTCCAAGTTGTTGATCGG	59.966	20	155	274070	274224
PT-275154-275160	TGAACATCCATCGACCGTTA	59.924	20	TCGATTTTCAAAAATTCCGC	60.019	20	245	274944	275188	TCAGCGCTTTCTTTAGGCTC	59.867	20	CTTCCGAAATCCATCCTTGA	60.006	20	237	275091	275327	TCTCAGCGCTTTCTTTAGGC	59.867	20	CTTCCGAAATCCATCCTTGA	60.006	20	239	275089	275327
PT-275426-275431	TCAAGGATGGATTTCGGAAG	60.006	20	GAGACAGAGTTGACTCCCGC	59.993	20	235	275308	275542	AAGATCGATGGCAATCAAGG	60.036	20	GAGACAGAGTTGACTCCCGC	59.993	20	249	275294	275542	AAGATCGATGGCAATCAAGG	60.036	20	GGCCATTCCCTCTTTCTTTC	60.017	20	162	275294	275455
PT-275527-275532	TCCCGAAAGAAAGAGGGAAT	60.011	20	AGCTTCTGCACAGCAGACAA	59.929	20	234	275432	275665	CTGGGCTTTCTCCCTCTTCT	59.95	20	AGCTTCTGCACAGCAGACAA	59.929	20	174	275492	275665	CTGGGCTTTCTCCCTCTTCT	59.95	20	TTGCCCGAGGAATCAGTTAC	60.074	20	278	275492	275769
PT-276265-276271	TGAATCACTGACAGTTCGGG	59.676	20	CAAACCTAGGGCATGTCGAT	59.955	20	297	276045	276341	CGCTTCACTTTGAGTTGGCT	60.571	20	ACCCGTTGAAGATCCTTGTG	59.966	20	298	276146	276443	CGCTTCACTTTGAGTTGGCT	60.571	20	CAAACCTAGGGCATGTCGAT	59.955	20	196	276146	276341
PT-276449-276454	ATCGACATGCCCTAGGTTTG	59.955	20	TTTCGGCCTATCGAAATCAC	60.038	20	238	276322	276559	AAAAGATCCCGGAATTGGTC	60.131	20	TTTCGGCCTATCGAAATCAC	60.038	20	191	276369	276559	CACAAGGATCTTCAACGGGT	59.966	20	GTTGGGAAGGCAGCATAAGA	60.214	20	258	276424	276681
PT-276828-276841	TGCTCCGTTACTGGCTCTCT	60.156	20	TATCCTCTTGATTCACCGCC	60.036	20	222	276803	277024	CTTGGAAAGGATGCCACTGT	60.111	20	CCACTAGGGACAGACCCAGA	60.104	20	170	276707	276876	ACTTGGAAAGGATGCCACTG	60.111	20	CCACTAGGGACAGACCCAGA	60.104	20	171	276706	276876
PT-277260-277265	ACCGGTGCTTATTTGACTGG	59.993	20	CTTGACCCAGTGGACCTTGT	60.002	20	172	277122	277293	GGCGGTGAATCAAGAGGATA	60.036	20	CTTGACCCAGTGGACCTTGT	60.002	20	289	277005	277293	ATGGCTCTCGATCTGGCTTA	59.939	20	CTTGACCCAGTGGACCTTGT	60.002	20	255	277039	277293
PT-280961-280961	AGAAGAAGCAGCAGCCTCAG	60.035	20	ATGGGTCGAATCGTGAAGAG	60.073	20	263	280795	281057	GATGAGGAGATGGCCAAAGA	60.158	20	ATGGGTCGAATCGTGAAGAG	60.073	20	244	280814	281057	AGAAGAAGCAGCAGCCTCAG	60.035	20	GGTCGAATCGTGAAGAGGAA	60.195	20	260	280795	281054
PT-283573-283578	CGATGCCAACAATACGACAC	59.995	20	CGAGTAAGATCAAGCGGGAG	59.971	20	288	283543	283830	CGATGCCAACAATACGACAC	59.995	20	CATGCCGAGGAAACTCCTTA	60.206	20	237	283543	283779	CGATGCCAACAATACGACAC	59.995	20	ATCTTTAGTGCGGAGGGTCA	59.694	20	255	283543	283797
PT-285925-285930	TGAACTGGTAGCTTCGTCCC	60.255	20	TTGAGCTTAGTCACCCGAGG	60.388	20	287	285730	286016	GTAGCTTCGTCCCTTCCCTC	60.212	20	GTTTCATAGTTCGATGCGGG	60.469	20	232	285737	285968	GTAGCTTCGTCCCTTCCCTC	60.212	20	GGTTTCATAGTTCGATGCGG	60.469	20	233	285737	285969
PT-292518-292523	GAAATCCCGGCAGTTCCTAT	60.286	20	ATTATTGGGAGGGGGAAATG	59.846	20	296	292392	292687	GGGATTGGTTTCACAGCTTC	59.532	20	ATTATTGGGAGGGGGAAATG	59.846	20	225	292463	292687	GGATTGGTTTCACAGCTTCC	59.532	20	ATTATTGGGAGGGGGAAATG	59.846	20	224	292464	292687
PT-293495-293495	TTTATCTGAGGCGCAGGTTT	59.845	20	TCGAGAGAAAGGGTTTGGAA	59.784	20	187	293336	293522	CGGTTAGAGCAAAGCCCATA	60.223	20	TCGAGAGAAAGGGTTTGGAA	59.784	20	275	293248	293522	GCCAGTTGTTCCAGTTGTCA	59.726	20	TCGAGAGAAAGGGTTTGGAA	59.784	20	209	293314	293522
PT-294274-294282	AGGTGAAGCAAATCAAACCG	60.11	20	CAAGAGTCACGCTCTAGCCC	60.156	20	281	294047	294327	CGCATAGGTGAAGCAAATCA	59.833	20	CAAGAGTCACGCTCTAGCCC	60.156	20	286	294042	294327	TCGAAGTGAGCTGTGGCTTA	59.74	20	CAAGAGTCACGCTCTAGCCC	60.156	20	182	294146	294327
PT-300145-300145	TGTCACCAGCTTCGAGATTG	59.984	20	CCAGCTGTTCAGGGTTGATT	60.111	20	260	300076	300335	TGTCACCAGCTTCGAGATTG	59.984	20	TCGGAAGCTCTAGAACCAGC	59.717	20	275	300076	300350	TGTCACCAGCTTCGAGATTG	59.984	20	GCTCTTGGTCGGAAGCTCTA	59.717	20	283	300076	300358
PT-303035-303041	GCTAGATCTGGGCTACCACG	59.859	20	GTTGTCAACCGGCCTAAAAA	59.975	20	159	302980	303138	GCTAGATCTGGGCTACCACG	59.859	20	AAATGGCTATACCTCCGCCT	59.951	20	222	302980	303201	GCTAGATCTGGGCTACCACG	59.859	20	CCGGCCTAAAAATGCTCATA	60.054	20	151	302980	303130
PT-304505-304510	CAACTACGCCTGCAAGATCA	60.011	20	CGAACAACAACAGGAGAGCA	60.025	20	220	304343	304562	GAGACCGACCAAGGAAACAA	60.088	20	CGAACAACAACAGGAGAGCA	60.025	20	248	304315	304562	CAACTACGCCTGCAAGATCA	60.011	20	GCTGTGCACAAAGGTTTGAA	59.888	20	256	304343	304598
PT-305181-305181	GTGCCCCTCTTTGATCATGT	59.934	20	GTACGCTCCTTGCCATTTGT	60.14	20	152	305141	305292	GTGCCCCTCTTTGATCATGT	59.934	20	CTTTCCTTCTTTAGGGCGGT	59.72	20	204	305141	305344	GTGCCCCTCTTTGATCATGT	59.934	20	ACTCTGCACCCACTCCAGTC	60.315	20	172	305141	305312
PT-305276-305276	GTGCCCCTCTTTGATCATGT	59.934	20	CTTTCCTTCTTTAGGGCGGT	59.72	20	204	305141	305344	GTGCCCCTCTTTGATCATGT	59.934	20	ACTCTGCACCCACTCCAGTC	60.315	20	172	305141	305312	GTGCCCCTCTTTGATCATGT	59.934	20	TATAAGGTTCCAGACGCCCA	60.46	20	279	305141	305419
PT-305570-305570	TTGTGCAAAAAGCCAGACAG	60.027	20	GTGGTGTGGTGCTAGTTCCC	60.431	20	153	305493	305645	CTTGTGCAAAAAGCCAGACA	60.027	20	GTGGTGTGGTGCTAGTTCCC	60.431	20	154	305492	305645	TTGTGCAAAAAGCCAGACAG	60.027	20	GGTGTGGTGCTAGTTCCCAG	60.567	20	151	305493	305643
PT-305952-305952	GAGCCGATGAGAAGACAAGG	59.95	20	CGTACCCATACAGGAACGCT	60.015	20	279	305829	306107	CCGATGAGAAGACAAGGGAG	59.797	20	CGTACCCATACAGGAACGCT	60.015	20	276	305832	306107	GAGCCGATGAGAAGACAAGG	59.95	20	TGAGATGGGAATACCCCTGA	60.272	20	223	305829	306051
PT-306318-306318	GCTGTTGCTTTAACCGAAGG	59.883	20	AAGAGCAGCAGGTTTTTCCA	59.993	20	174	306280	306453	GCTGTTGCTTTAACCGAAGG	59.883	20	AGAGCAGCAGGTTTTTCCAA	59.993	20	173	306280	306452	GGCTGTTGCTTTAACCGAAG	59.883	20	AAGAGCAGCAGGTTTTTCCA	59.993	20	175	306279	306453
PT-306678-306678	CCCTGTCTGTCTTGATGGGT	59.962	20	TCAAGAGGAGTCGCTTGGTT	59.989	20	234	306650	306883	CCCTGTCTGTCTTGATGGGT	59.962	20	CAACCTACGTCTGCGGGTAT	60.015	20	187	306650	306836	CCCTGTCTGTCTTGATGGGT	59.962	20	AGTCGCTTGGTTACGCAGTT	59.943	20	226	306650	306875
PT-306749-306764	CCCTGTCTGTCTTGATGGGT	59.962	20	TCAAGAGGAGTCGCTTGGTT	59.989	20	234	306650	306883	CCCTGTCTGTCTTGATGGGT	59.962	20	CAACCTACGTCTGCGGGTAT	60.015	20	187	306650	306836	CCCTGTCTGTCTTGATGGGT	59.962	20	AGTCGCTTGGTTACGCAGTT	59.943	20	226	306650	306875
PT-306965-306970	AACCAAGCGACTCCTCTTGA	59.989	20	GCGAGCAGAGCGTAAGAGTT	59.927	20	218	306864	307081	AACCAAGCGACTCCTCTTGA	59.989	20	TTCAGTCCACCCTTCAATCC	59.903	20	246	306864	307109	AACCAAGCGACTCCTCTTGA	59.989	20	TTACAGCCTTCAGTCCACCC	60.111	20	254	306864	307117
PT-307241-307241	AACTCTTACGCTCTGCTCGC	59.927	20	ATGCGGATTCGAACTTTGTT	59.574	20	229	307062	307290	GGATTGAAGGGTGGACTGAA	59.903	20	ATGCGGATTCGAACTTTGTT	59.574	20	201	307090	307290	GGGTGGACTGAAGGCTGTAA	60.111	20	ATGCGGATTCGAACTTTGTT	59.574	20	193	307098	307290
PT-307305-307305	AAAGTTCGAATCCGCATGAT	59.533	20	AATCCTTTTGTTCGTGTGGG	59.83	20	289	307274	307562	TCAGTCTAGGGCCCAAAAGA	59.807	20	GCCAAGTTCCTCCTCGGTAT	60.464	20	260	307194	307453	TAGGGCCCAAAAGAGGGTAT	59.793	20	GCCAAGTTCCTCCTCGGTAT	60.464	20	254	307200	307453
PT-307727-307727	CCCACACGAACAAAAGGATT	59.83	20	TGTTCCTCAGGTCCGTCTTC	60.238	20	237	307543	307779	AGATAGCCCTTATGCCGACC	60.439	20	ACTGTACACGGGTTGCCTTC	60.035	20	231	307642	307872	AGATAGCCCTTATGCCGACC	60.439	20	GACTGTACACGGGTTGCCTT	60.035	20	232	307642	307873
PT-307853-307865	AGGCCTAAAGGAGGAACGAG	59.842	20	TTCACTCCACCCTTCAATCC	59.903	20	155	307792	307946	GAAGACGGACCTGAGGAACA	60.238	20	TTCACTCCACCCTTCAATCC	59.903	20	187	307760	307946	GGCCTAAAGGAGGAACGAGT	59.713	20	TTCACTCCACCCTTCAATCC	59.903	20	154	307793	307946
PT-307897-307897	AAGGCAACCCGTGTACAGTC	60.035	20	TATTCCCAACCCATTTTCCA	59.988	20	252	307854	308105	GCAACCCGTGTACAGTCCTT	60.035	20	TATTCCCAACCCATTTTCCA	59.988	20	249	307857	308105	GAAGGCAACCCGTGTACAGT	60.035	20	TATTCCCAACCCATTTTCCA	59.988	20	253	307853	308105
PT-308055-308077	AAGGCAACCCGTGTACAGTC	60.035	20	TATTCCCAACCCATTTTCCA	59.988	20	252	307854	308105	GCAACCCGTGTACAGTCCTT	60.035	20	TATTCCCAACCCATTTTCCA	59.988	20	249	307857	308105	GAAGGCAACCCGTGTACAGT	60.035	20	TATTCCCAACCCATTTTCCA	59.988	20	253	307853	308105
PT-308129-308129	TGGAAAATGGGTTGGGAATA	59.988	20	GCGTTCAGCTTTGGATCTTT	59.457	20	250	308086	308335	TGGAAAATGGGTTGGGAATA	59.988	20	CTTGTGAAGGCGTTCAGCTT	60.571	20	259	308086	308344	TGGAAAATGGGTTGGGAATA	59.988	20	CTGTGGATTTCCCCAATGAA	60.692	20	294	308086	308379
PT-308196-308202	TGGAAAATGGGTTGGGAATA	59.988	20	GCGTTCAGCTTTGGATCTTT	59.457	20	250	308086	308335	TGGAAAATGGGTTGGGAATA	59.988	20	CTTGTGAAGGCGTTCAGCTT	60.571	20	259	308086	308344	TGGAAAATGGGTTGGGAATA	59.988	20	CTGTGGATTTCCCCAATGAA	60.692	20	294	308086	308379
PT-308267-308277	TGGAAAATGGGTTGGGAATA	59.988	20	GCGTTCAGCTTTGGATCTTT	59.457	20	250	308086	308335	TGGAAAATGGGTTGGGAATA	59.988	20	CTTGTGAAGGCGTTCAGCTT	60.571	20	259	308086	308344	TGGAAAATGGGTTGGGAATA	59.988	20	CTGTGGATTTCCCCAATGAA	60.692	20	294	308086	308379
PT-308579-308579	ACGGATGGATCCAATACCAA	60.014	20	ACGATTAGCTTGAACACCCG	60.132	20	298	308537	308834	ACGGATGGATCCAATACCAA	60.014	20	TAGCTTGAACACCCGACCTC	60.255	20	293	308537	308829	ACGGATGGATCCAATACCAA	60.014	20	TTAGCTTGAACACCCGACCT	59.734	20	294	308537	308830
PT-308775-308775	ACGGATGGATCCAATACCAA	60.014	20	ACGATTAGCTTGAACACCCG	60.132	20	298	308537	308834	TCTCGAGAGAGTCCCAGCAT	60.096	20	ACGATTAGCTTGAACACCCG	60.132	20	230	308605	308834	CCCCTAGCTAGTGCGTTCAC	59.898	20	ACGATTAGCTTGAACACCCG	60.132	20	168	308667	308834
PT-308970-308970	TCGAAAGGACCAATTGAAGG	60.044	20	CGGCAACTAAAGAGGTAGCG	60.032	20	210	308786	308995	CGGGTGTTCAAGCTAATCGT	60.132	20	CGGCAACTAAAGAGGTAGCG	60.032	20	181	308815	308995	CGGGTGTTCAAGCTAATCGT	60.132	20	GCTGCTTCTCCTTCATCGTC	60.104	20	262	308815	309076
PT-309139-309151	GACGATGAAGGAGAAGCAGC	60.104	20	AATATTCCCACGGTTCACCA	60.051	20	240	309057	309296	AAGGACCAACGACGATGAAG	60.111	20	AATATTCCCACGGTTCACCA	60.051	20	250	309047	309296	GAAAGAAGGACCAACGACGA	60.232	20	AATATTCCCACGGTTCACCA	60.051	20	255	309042	309296
PT-309227-309236	GACGATGAAGGAGAAGCAGC	60.104	20	AATATTCCCACGGTTCACCA	60.051	20	240	309057	309296	AAGGACCAACGACGATGAAG	60.111	20	AATATTCCCACGGTTCACCA	60.051	20	250	309047	309296	GAAAGAAGGACCAACGACGA	60.232	20	AATATTCCCACGGTTCACCA	60.051	20	255	309042	309296
PT-309403-309415	GCTTTATGGCTCGTCTTTGG	59.845	20	GGACGATTATGGGTGGAATG	60.014	20	268	309341	309608	GCTTTATGGCTCGTCTTTGG	59.845	20	CATTCATATGATCCCCGTCC	59.975	20	217	309341	309557	GCTTTATGGCTCGTCTTTGG	59.845	20	ATTCATATGATCCCCGTCCA	59.975	20	216	309341	309556
PT-309470-309470	GCTTTATGGCTCGTCTTTGG	59.845	20	GGACGATTATGGGTGGAATG	60.014	20	268	309341	309608	GCTTTATGGCTCGTCTTTGG	59.845	20	CATTCATATGATCCCCGTCC	59.975	20	217	309341	309557	GCTTTATGGCTCGTCTTTGG	59.845	20	ATTCATATGATCCCCGTCCA	59.975	20	216	309341	309556
PT-309529-309529	GCTTTATGGCTCGTCTTTGG	59.845	20	GGACGATTATGGGTGGAATG	60.014	20	268	309341	309608	ATCACCAATGGCAAGAAAGG	59.933	20	CGTCCTTTGTGAGGACGATT	60.111	20	160	309461	309620	GCTTTATGGCTCGTCTTTGG	59.845	20	CATTCATATGATCCCCGTCC	59.975	20	217	309341	309557
PT-309864-309868	CATACGCAGGAAAGTGGGAT	59.955	20	ATCCGCTTGTCAATTCTTGG	60.074	20	241	309685	309925	ATCATATGTATGGGCCGGAA	60.001	20	TGAAACTTATGCGCACCTTG	59.872	20	218	309783	310000	AATCATATGTATGGGCCGGA	60.001	20	TGAAACTTATGCGCACCTTG	59.872	20	219	309782	310000
PT-310012-310015	CAAGGTGCGCATAAGTTTCA	59.872	20	AAATTTCTTGGAACGGGGTC	60.166	20	226	309981	310206	GACAAGCGGATGACTTTCGT	60.263	20	AAATTTCTTGGAACGGGGTC	60.166	20	292	309915	310206	AAGCGGATGACTTTCGTGAG	60.397	20	AAATTTCTTGGAACGGGGTC	60.166	20	289	309918	310206
PT-310068-310068	CAAGGTGCGCATAAGTTTCA	59.872	20	AAATTTCTTGGAACGGGGTC	60.166	20	226	309981	310206	GACAAGCGGATGACTTTCGT	60.263	20	AAATTTCTTGGAACGGGGTC	60.166	20	292	309915	310206	AAGCGGATGACTTTCGTGAG	60.397	20	AAATTTCTTGGAACGGGGTC	60.166	20	289	309918	310206
PT-310156-310156	CAAGGTGCGCATAAGTTTCA	59.872	20	AAATTTCTTGGAACGGGGTC	60.166	20	226	309981	310206	GACAAGCGGATGACTTTCGT	60.263	20	AAATTTCTTGGAACGGGGTC	60.166	20	292	309915	310206	AAGCGGATGACTTTCGTGAG	60.397	20	AAATTTCTTGGAACGGGGTC	60.166	20	289	309918	310206
PT-310206-310206	CCATGGGAGCTACCTTTTCA	60.066	20	TCTCTTTTGATTGCGTGCAG	60.134	20	275	310155	310429	CCATGGGAGCTACCTTTTCA	60.066	20	ATAGGCGAGCTTTCATCCCT	60.194	20	240	310155	310394	CCATGGGAGCTACCTTTTCA	60.066	20	AGCTTTCATCCCTTGTGACG	60.255	20	233	310155	310387
PT-310251-310266	CCATGGGAGCTACCTTTTCA	60.066	20	TCTCTTTTGATTGCGTGCAG	60.134	20	275	310155	310429	CCATGGGAGCTACCTTTTCA	60.066	20	ATAGGCGAGCTTTCATCCCT	60.194	20	240	310155	310394	CCATGGGAGCTACCTTTTCA	60.066	20	AGCTTTCATCCCTTGTGACG	60.255	20	233	310155	310387
PT-310313-310315	CCATGGGAGCTACCTTTTCA	60.066	20	TCTCTTTTGATTGCGTGCAG	60.134	20	275	310155	310429	CCATGGGAGCTACCTTTTCA	60.066	20	ATAGGCGAGCTTTCATCCCT	60.194	20	240	310155	310394	CCATGGGAGCTACCTTTTCA	60.066	20	AGCTTTCATCCCTTGTGACG	60.255	20	233	310155	310387
PT-310396-310404	CCATGGGAGCTACCTTTTCA	60.066	20	TCTCTTTTGATTGCGTGCAG	60.134	20	275	310155	310429	GACTCTGATTCGGGTTCGTC	59.661	20	TGAGCTAGTGGCATGAATCG	59.972	20	218	310352	310569	GACTCTGATTCGGGTTCGTC	59.661	20	GTGGGACTTGAGCTAGTGGC	59.874	20	226	310352	310577
PT-310448-310455	TGCACGCAATCAAAAGAGAG	60.134	20	TGAGCTAGTGGCATGAATCG	59.972	20	159	310411	310569	CTGCACGCAATCAAAAGAGA	60.134	20	TGAGCTAGTGGCATGAATCG	59.972	20	160	310410	310569	CGCCTATGCGGAAGAAATAA	60.185	20	TGAGCTAGTGGCATGAATCG	59.972	20	182	310388	310569
PT-310541-310575	TTCTACGCTGAAAGCGGACT	60.154	20	GAAATTGGCCAGTGTGAGGT	59.973	20	289	310511	310799	TTCTACGCTGAAAGCGGACT	60.154	20	ATTGGCCAGTGTGAGGTTTC	59.973	20	286	310511	310796	TTCTACGCTGAAAGCGGACT	60.154	20	TGAGGTTTCCCTTTCTGTGG	60.081	20	275	310511	310785
PT-310666-310670	CGATTCATGCCACTAGCTCA	59.972	20	TGAGGTTTCCCTTTCTGTGG	60.081	20	236	310550	310785	GCCACTAGCTCAAGTCCCAC	59.874	20	ATTGGCCAGTGTGAGGTTTC	59.973	20	239	310558	310796	GCCACTAGCTCAAGTCCCAC	59.874	20	GAAATTGGCCAGTGTGAGGT	59.973	20	242	310558	310799
PT-310761-310762	CGATTCATGCCACTAGCTCA	59.972	20	TGAGGTTTCCCTTTCTGTGG	60.081	20	236	310550	310785	GCCACTAGCTCAAGTCCCAC	59.874	20	ATTGGCCAGTGTGAGGTTTC	59.973	20	239	310558	310796	GCCACTAGCTCAAGTCCCAC	59.874	20	GAAATTGGCCAGTGTGAGGT	59.973	20	242	310558	310799
PT-310837-310838	CACACTGGCCAATTTCACAC	60.008	20	CATAGCGGAAGGGAATCAAA	60.031	20	224	310784	311007	CCACAGAAAGGGAAACCTCA	60.081	20	CATAGCGGAAGGGAATCAAA	60.031	20	242	310766	311007	CACACTGGCCAATTTCACAC	60.008	20	GGCGATCGTAGTGAGGTGTT	60.142	20	258	310784	311041
PT-311584-311590	TATTCCCATTGGACCGGTAA	60.009	20	ATAAGACCGACCACGCAATC	59.962	20	300	311379	311678	GGTAAACTGATTCGAGCCCA	60.074	20	ACAAATAAGACCGACCACGC	60	20	247	311436	311682	GGTAAACTGATTCGAGCCCA	60.074	20	ATAAGACCGACCACGCAATC	59.962	20	243	311436	311678
PT-312279-312281	TTCGTGCGAGAAATGACTTG	59.988	20	CATTCCGGGTAGTGAGGAGA	60.065	20	232	312142	312373	TTCGTGCGAGAAATGACTTG	59.988	20	GACATTCCGGGTAGTGAGGA	59.927	20	234	312142	312375	ACCCTATCGAAAGGCGATCT	60.06	20	CATTCCGGGTAGTGAGGAGA	60.065	20	201	312173	312373
PT-313331-313336	CCTGGACCACCTGATTCACT	59.962	20	CGGTAAGGCTAACGGTGGTA	60.011	20	300	313204	313503	ACCATCTGGTTAGTGCGAGG	60.134	20	CGGTAAGGCTAACGGTGGTA	60.011	20	280	313224	313503	ACGTAGCTTGCTTGCCTCAC	60.602	20	CGGTAAGGCTAACGGTGGTA	60.011	20	238	313266	313503
PT-313384-313384	CCTGGACCACCTGATTCACT	59.962	20	CGGTAAGGCTAACGGTGGTA	60.011	20	300	313204	313503	ACCATCTGGTTAGTGCGAGG	60.134	20	CGGTAAGGCTAACGGTGGTA	60.011	20	280	313224	313503	ACGTAGCTTGCTTGCCTCAC	60.602	20	CGGTAAGGCTAACGGTGGTA	60.011	20	238	313266	313503
PT-313551-313552	TGGGGCTTTTCTTAAGCTGT	58.973	20	ACGTGAGAGGCGAGCTATGT	60.043	20	291	313509	313799	GTGGGGCTTTTCTTAAGCTG	58.973	20	ACGTGAGAGGCGAGCTATGT	60.043	20	292	313508	313799	CACTACCGTCTGGTTCTAGCG	59.944	21	TGGGAAGGTGTCAGGTAAGG	59.959	20	237	313348	313584
PT-313826-313826	TCCCTATCCCCTAACAAGCC	60.278	20	TGTCCCAGTTCGAGTTGTTG	59.72	20	272	313618	313889	TCCCTATCCCCTAACAAGCC	60.278	20	TCGAGTTGTTGGTCCAGTTG	59.72	20	263	313618	313880	TCCCTATCCCCTAACAAGCC	60.278	20	GCTGTCCCAGTTCGAGTTGT	60.307	20	274	313618	313891
PT-314232-314233	ACCACCGAAATAGCTGATGC	60.103	20	CAAAGGCAAGGCAGTAGGAG	60.008	20	240	314053	314292	ACGATGTCCCTATGTCCCAG	59.803	20	CAAAGGCAAGGCAGTAGGAG	60.008	20	173	314120	314292	ACCACCGAAATAGCTGATGC	60.103	20	TTGTGGAAGATGCTGCAGAG	60.136	20	264	314053	314316
PT-314327-314327	CTCCTACTGCCTTGCCTTTG	60.008	20	AAAATGGGGCAATTTAAGGC	60.148	20	205	314273	314477	TCTGCAGCATCTTCCACAAC	59.992	20	AAAATGGGGCAATTTAAGGC	60.148	20	180	314298	314477	CTCCTACTGCCTTGCCTTTG	60.008	20	CGGAGATCTGGTCAGGAAAA	60.187	20	221	314273	314493
PT-315069-315077	TGCCTTTCCTAAACAGGTCG	60.241	20	AACGGAAAGCAAGCAAGAAA	59.996	20	154	314954	315107	GAGGGATGGAATAGAGTGCG	59.653	20	AACGGAAAGCAAGCAAGAAA	59.996	20	232	314876	315107	CGAGGGATGGAATAGAGTGC	59.653	20	AACGGAAAGCAAGCAAGAAA	59.996	20	233	314875	315107
PT-315291-315291	TTTCTTGCTTGCTTTCCGTT	59.996	20	CTGCTTCCTCTCCCAGACTC	59.127	20	227	315088	315314	TCTTGCTTGCTTTCCGTTCT	60.132	20	CTGCTTCCTCTCCCAGACTC	59.127	20	225	315090	315314	TTTCTTGCTTGCTTTCCGTT	59.996	20	ACTGCTTCCTCTCCCAGACTC	60.006	21	228	315088	315315
PT-316797-316797	TTTTTCGCCAGGTTTCATTC	60.053	20	TGGTGAGGAGGCAGCTTAGT	60.012	20	283	316749	317031	TTTTTCGCCAGGTTTCATTC	60.053	20	GTGGTGAGGAGGCAGCTTAG	60.012	20	284	316749	317032	TCACTTCTTTTTCGCCAGGT	59.853	20	TGGTGAGGAGGCAGCTTAGT	60.012	20	290	316742	317031
PT-317051-317059	CTAAGCTGCCTCCTCACCAC	60.012	20	ATTGTTGACATCTCCCGAGG	59.927	20	265	317013	317277	ACTAAGCTGCCTCCTCACCA	60.012	20	ATTGTTGACATCTCCCGAGG	59.927	20	266	317012	317277	CGGGGAGCTATCACAGAGAC	59.827	20	ATTGTTGACATCTCCCGAGG	59.927	20	284	316994	317277
PT-317828-317833	GAAGGACAGTCCAATTCCGA	60.05	20	GACTCTGGCCTGAGACTTGC	60.143	20	295	317725	318019	GAAGGACAGTCCAATTCCGA	60.05	20	CTCTGGCCTGAGACTTGCTC	60.284	20	293	317725	318017	GAAGGACAGTCCAATTCCGA	60.05	20	TGGCCTGAGACTTGCTCATA	59.547	20	290	317725	318014
PT-318125-318134	CCAGTTTGAAGTGGTCAGCA	59.873	20	TTCTATTGCCGGGAGCATAC	60.06	20	172	318020	318191	GCCAGAGTCCCAGTTTGAAG	59.844	20	TTCTATTGCCGGGAGCATAC	60.06	20	181	318011	318191	CCAGTTTGAAGTGGTCAGCA	59.873	20	ATCCATTCTTCGGAGGGAGT	59.896	20	243	318020	318262
PT-319189-319195	CTTCTTGTGAGGAAAAGCCG	59.986	20	AACCCCCGAGTACCAATTTC	60.053	20	266	319040	319305	CTTCTTGTGAGGAAAAGCCG	59.986	20	GAACCCCCGAGTACCAATTT	60.053	20	267	319040	319306	CTTCTTGTGAGGAAAAGCCG	59.986	20	CGAAGAGGTCTCAAACGACC	59.844	20	200	319040	319239
PT-319627-319627	CTCTCGATTGCATCCCCTTA	60.17	20	TGCTAGTAGACACCCACCCC	59.989	20	242	319475	319716	GGAATGTGGTCTTGCACTGA	59.682	20	TGCTAGTAGACACCCACCCC	59.989	20	288	319429	319716	AAAGTGGGTGGAATGTGGTC	59.679	20	TGCTAGTAGACACCCACCCC	59.989	20	297	319420	319716
PT-319836-319841	GATTCCTGCCCCATTGTAAA	59.762	20	TGCGGGAATTTAATAAGCCA	60.405	20	281	319620	319900	AGGTGCAATGATCTGGGAAA	60.461	20	CCTGGGTGGGGTTTAGTTCT	60.218	20	283	319749	320031	AGGTGCAATGATCTGGGAAA	60.461	20	AAGCACCATTCTGACTTCCG	60.255	20	197	319749	319945
PT-322259-322275	AGCCGAACTAAAGCTCCACA	60.015	20	GCTCTTCACGGAAAGGAGTG	59.989	20	199	322236	322434	AGCCGAACTAAAGCTCCACA	60.015	20	TGCTCTTCACGGAAAGGAGT	59.989	20	200	322236	322435	CAGTGGGATCACCGTTTTCT	59.966	20	GCTCTTCACGGAAAGGAGTG	59.989	20	295	322140	322434
PT-323094-323094	TTCAATAGCGTTTGCGTGAG	60.014	20	CCTCTCAATCTTAAGGGGGC	60.032	20	231	322900	323130	TGCGAAACTTGACTGACCTG	60.025	20	CCTCTCAATCTTAAGGGGGC	60.032	20	151	322980	323130	TTCAATAGCGTTTGCGTGAG	60.014	20	CCCTATCCGAGTTAGCCCTC	60.053	20	247	322900	323146
PT-323198-323202	GAGGGCTAACTCGGATAGGG	60.053	20	AGAAGATGGATCCGTTGCC	60.026	19	247	323127	323373	ACTCGGATAGGGCGGATAGT	59.947	20	AGAAGATGGATCCGTTGCC	60.026	19	239	323135	323373	GAGGGCTAACTCGGATAGGG	60.053	20	GATCCGTTGCCACTTTCATAA	59.952	21	239	323127	323365
PT-323371-323400	GGGGGAACTTAACGTTGCTA	59.087	20	GGCCATCCTTTGCTAGTTCA	60.214	20	279	323188	323466	GGGGGAACTTAACGTTGCTA	59.087	20	TAGCTCAAGGCCATCCTTTG	60.344	20	287	323188	323474	GGGGGAACTTAACGTTGCTA	59.087	20	CTCAAGGCCATCCTTTGCTA	60.344	20	284	323188	323471
PT-323440-323440	GGGGGAACTTAACGTTGCTA	59.087	20	GGCCATCCTTTGCTAGTTCA	60.214	20	279	323188	323466	GGGGGAACTTAACGTTGCTA	59.087	20	TAGCTCAAGGCCATCCTTTG	60.344	20	287	323188	323474	GGGGGAACTTAACGTTGCTA	59.087	20	CTCAAGGCCATCCTTTGCTA	60.344	20	284	323188	323471
PT-323575-323594	GCGGATTCCTCCTCTCCTTA	60.673	20	TGACCTCTTTCCTTGTGGCT	59.844	20	294	323480	323773	AACAGCGGATTCCTCCTCTC	60.735	20	TGACCTCTTTCCTTGTGGCT	59.844	20	298	323476	323773	AGAACAGCGGATTCCTCCTC	60.735	20	TGACCTCTTTCCTTGTGGCT	59.844	20	300	323474	323773
PT-323634-323635	GCGGATTCCTCCTCTCCTTA	60.673	20	TGACCTCTTTCCTTGTGGCT	59.844	20	294	323480	323773	AAGAAAGCATTTGACCCTGC	59.316	20	TGACCTCTTTCCTTGTGGCT	59.844	20	170	323604	323773	AACAGCGGATTCCTCCTCTC	60.735	20	TGACCTCTTTCCTTGTGGCT	59.844	20	298	323476	323773
PT-323701-323701	CGGCAACTCCTTCCTTTCTA	59.448	20	TCATTCAATTCTTCCTCGCC	60.155	20	282	323623	323904	CGGCAACTCCTTCCTTTCTA	59.448	20	TGACCTCTTTCCTTGTGGCT	59.844	20	151	323623	323773	CGGCAACTCCTTCCTTTCTA	59.448	20	TTGACCTCTTTCCTTGTGGC	60.232	20	152	323623	323774
PT-323758-323758	TCTGAGTTCAGAGTCGCCAA	59.701	20	GTCAACCGAAGCAGTTCCAT	60.119	20	251	323735	323985	TCTGAGTTCAGAGTCGCCAA	59.701	20	AAAGAAGGTCAACCGAAGCA	59.853	20	258	323735	323992	TCTGAGTTCAGAGTCGCCAA	59.701	20	CGAAAGAAGGTCAACCGAAG	59.846	20	260	323735	323994
PT-323872-323872	AGCCACAAGGAAAGAGGTCA	59.844	20	GTCAACCGAAGCAGTTCCAT	60.119	20	232	323754	323985	AGCCACAAGGAAAGAGGTCA	59.844	20	AAAGAAGGTCAACCGAAGCA	59.853	20	239	323754	323992	AGCCACAAGGAAAGAGGTCA	59.844	20	CGAAAGAAGGTCAACCGAAG	59.846	20	241	323754	323994
PT-324084-324085	ATGGAACTGCTTCGGTTGAC	60.119	20	GTTTCCGGTGTAAGGCTCAA	60.11	20	293	323966	324258	TTTCCTTCTTCTCTCGCTGC	59.836	20	ACTTTCGGAAGGCCAAGAAT	60.074	20	272	324020	324291	TGCTTCGGTTGACCTTCTTT	59.853	20	GTTTCCGGTGTAAGGCTCAA	60.11	20	286	323973	324258
PT-324144-324174	ATGGAACTGCTTCGGTTGAC	60.119	20	GTTTCCGGTGTAAGGCTCAA	60.11	20	293	323966	324258	TTTCCTTCTTCTCTCGCTGC	59.836	20	ACTTTCGGAAGGCCAAGAAT	60.074	20	272	324020	324291	TGCTTCGGTTGACCTTCTTT	59.853	20	GTTTCCGGTGTAAGGCTCAA	60.11	20	286	323973	324258
PT-324315-324376	TTGAGCCTTACACCGGAAAC	60.11	20	GCGGGTTGAAGGAATGAATA	59.901	20	287	324239	324525	CCGAAAGTGACTGCCCTAAG	59.869	20	GCGGGTTGAAGGAATGAATA	59.901	20	242	324284	324525	CTTGAGCCTTACACCGGAAA	60.241	20	GCGGGTTGAAGGAATGAATA	59.901	20	288	324238	324525
PT-324424-324424	CTTGAGGGCTTCTCCCTTCT	59.95	20	GCGGGTTGAAGGAATGAATA	59.901	20	214	324312	324525	TTGAGCCTTACACCGGAAAC	60.11	20	GCGGGTTGAAGGAATGAATA	59.901	20	287	324239	324525	CCGAAAGTGACTGCCCTAAG	59.869	20	GCGGGTTGAAGGAATGAATA	59.901	20	242	324284	324525
PT-324554-324561	TATTCATTCCTTCAACCCGC	59.901	20	TTCGTAAATTCCCGTCTTGC	60.074	20	246	324506	324751	TATTCATTCCTTCAACCCGC	59.901	20	ATTGTGGAGTGAACGAAGCC	60.119	20	181	324506	324686	TATTCATTCCTTCAACCCGC	59.901	20	GAGTGAACGAAGCCAAGTCC	59.851	20	175	324506	324680
PT-324601-324601	TATTCATTCCTTCAACCCGC	59.901	20	TTCGTAAATTCCCGTCTTGC	60.074	20	246	324506	324751	TATTCATTCCTTCAACCCGC	59.901	20	ATTGTGGAGTGAACGAAGCC	60.119	20	181	324506	324686	TATTCATTCCTTCAACCCGC	59.901	20	GAGTGAACGAAGCCAAGTCC	59.851	20	175	324506	324680
PT-324637-324640	TATTCATTCCTTCAACCCGC	59.901	20	TTCGTAAATTCCCGTCTTGC	60.074	20	246	324506	324751	TATTCATTCCTTCAACCCGC	59.901	20	ATTGTGGAGTGAACGAAGCC	60.119	20	181	324506	324686	TATTCATTCCTTCAACCCGC	59.901	20	GAGTGAACGAAGCCAAGTCC	59.851	20	175	324506	324680
PT-325639-325645	TCAGCTGCACATGAATAGGC	59.979	20	GTTTTGGATGCGCTTCTCTC	59.962	20	232	325470	325701	TCAGCTGCACATGAATAGGC	59.979	20	CGCTTCTCTCTTTCCTCCCT	60.088	20	222	325470	325691	TCAGCTGCACATGAATAGGC	59.979	20	TTGGATGCGCTTCTCTCTTT	60.096	20	229	325470	325698
PT-326002-326005	TCTCTTCCTATTCCCACCCC	60.264	20	CAAAGGTGGAGCTTACTCGC	60.015	20	186	325973	326158	TCTCTTCCTATTCCCACCCC	60.264	20	GAACCGGAGATGGAGACAAA	60.05	20	202	325973	326174	GACAACAGATGCGGATGAAA	59.654	20	CTACTGGGGTCTGCTTGCTC	60.012	20	193	325903	326095
PT-326951-326956	TCCCAAACCTTGGTCTATCG	59.926	20	CGAAGAAGAGCCATCTTTGC	60.096	20	252	326804	327055	GTAACATGGTCAGTGTGCCG	60.032	20	TAAAAGTCGCGAAATGGAGG	60.202	20	298	326723	327020	TCCCAAACCTTGGTCTATCG	59.926	20	TAAAAGTCGCGAAATGGAGG	60.202	20	217	326804	327020
PT-327773-327779	GCTGTTGTTAGCTTGGGCTC	60.022	20	GTCTCGCGCCATATTTGATT	60.067	20	218	327698	327915	TTAGCTTGGGCTCGGTTAGA	59.975	20	GTCTCGCGCCATATTTGATT	60.067	20	211	327705	327915	ATAATTAGGGGTTGGAGGCG	60.164	20	CCCAAGCATGGTTGATCTTT	59.933	20	265	327541	327805
PT-328884-328885	GAGCAAAAGCGTACTTTGGG	59.883	20	GAGTCGGAAAATAGGCCCTC	60.039	20	173	328807	328979	GGTGGTCGACATTGCTTCTT	60.119	20	GAGTCGGAAAATAGGCCCTC	60.039	20	220	328760	328979	TGGTCGACATTGCTTCTTTG	59.84	20	GAGTCGGAAAATAGGCCCTC	60.039	20	218	328762	328979
PT-330188-330188	GAGACGAACGCAGTGATTGA	59.992	20	AGAAAGGAACGGGAAAGGAA	60.046	20	268	330094	330361	GGCTACTCACGAAGGAGACG	60.012	20	AGAAAGGAACGGGAAAGGAA	60.046	20	282	330080	330361	GAACGCAGTGATTGAGCGTA	60.019	20	AGAAAGGAACGGGAAAGGAA	60.046	20	263	330099	330361
PT-330346-330352	AACTCCGCTCAAGTGTTCGT	59.914	20	CAGTCCGAGATCCGTAAAGG	59.688	20	300	330183	330482	GAAAGGCAAGTAATCGTCCG	59.708	20	GCAGTCCGAGATCCGTAAAG	59.836	20	217	330267	330483	AACTCCGCTCAAGTGTTCGT	59.914	20	AGTCCGAGATCCGTAAAGGG	60.455	20	299	330183	330481
PT-330585-330585	AGACCGGTTGCAGTTGAATC	60.119	20	GGGTAGACGAACGGAGTGAA	60.111	20	280	330409	330688	TTCCTTTCCCGTTCCTTTCT	60.046	20	TTTTAATCGCTTTCTCCCGA	59.789	20	274	330342	330615	CTTTACGGATCTCGGACTGC	59.836	20	GGGTAGACGAACGGAGTGAA	60.111	20	225	330464	330688
PT-331058-331058	TATGACAGTTCGTTGCCAGC	59.871	20	CCGTACCACTCCATCGATCT	59.95	20	291	330842	331132	GGCTACAGATGCTTTCGCTC	60.125	20	CATCCACAATGAAGCCAATG	59.924	20	256	331021	331276	GGCTACAGATGCTTTCGCTC	60.125	20	ACAGGGGTGACATCCACAAT	60.096	20	266	331021	331286
PT-333379-333379	CACAGAACGTCATCCACAGG	60.154	20	GACATTCCCCCAACTCAGAA	59.903	20	248	333345	333592	TCATCCACAGGACACTCTCG	59.82	20	GACATTCCCCCAACTCAGAA	59.903	20	239	333354	333592	CACAGAACGTCATCCACAGG	60.154	20	TTAGACGGATCCAAAGCAGG	60.206	20	160	333345	333504
PT-334401-334401	TGAAATGAATTGGTGCCTGA	60.049	20	GCTTCCCTCGGGTTTTAGAC	60.074	20	182	334298	334479	AAATGAATTGGTGCCTGAGC	60.081	20	GCTTCCCTCGGGTTTTAGAC	60.074	20	180	334300	334479	CAGCAGGAGTTGGTATCGGT	60.134	20	TGGAGATCTTTCCCCATCAC	59.862	20	290	334334	334623
PT-335514-335519	CTGGAGAGACGAAACAAGCC	59.989	20	AAATACCGACAGCATGAGGC	60.103	20	233	335327	335559	TGTCCACAGTTCGTGCTTTC	59.88	20	CACAAACGAAAAAGGGCAAT	59.975	20	268	335479	335746	GTCCACAGTTCGTGCTTTCA	59.88	20	CACAAACGAAAAAGGGCAAT	59.975	20	267	335480	335746
PT-346578-346583	AATGCGAGTGACTTTTTGGG	60.11	20	AACAATTGAGAATGGGGCAG	59.933	20	292	346554	346845	AAGCTGGTGTTGGAACTGCT	59.914	20	GGCTTGGCATTAAGACTTCG	59.845	20	293	346498	346790	AGCTGGTGTTGGAACTGCTT	59.914	20	GGCTTGGCATTAAGACTTCG	59.845	20	292	346499	346790
PT-368145-368150	TGCTTTGGTTCTCCGATACC	60.074	20	AGGGGAAGTCAAGGACCAGT	59.968	20	156	368119	368274	CCTGCTTTGGTTCTCCGATA	60.206	20	AGGGGAAGTCAAGGACCAGT	59.968	20	158	368117	368274	CAAACCAGACATCTCGCCTT	60.255	20	AGGGGAAGTCAAGGACCAGT	59.968	20	190	368085	368274
PT-368297-368301	ACTGGTCCTTGACTTCCCCT	59.968	20	AGATTCCTTCCCGAACCACT	59.935	20	218	368255	368472	ACTGGTCCTTGACTTCCCCT	59.968	20	GCTCCCTCCTATTACTGGGG	59.919	20	271	368255	368525	ACTGGTCCTTGACTTCCCCT	59.968	20	TTCTTCCTGCCTCCCAGTTA	59.807	20	189	368255	368443
PT-368975-368981	CGGACTCCTCATTGGAAAAA	60.044	20	CAAAGATCGATGGCTGTGAA	59.799	20	277	368773	369049	CGGACTCCTCATTGGAAAAA	60.044	20	TTCAAAGATCGATGGCTGTG	59.799	20	279	368773	369051	TGGAAAAAGAATGGCAAAGG	60.046	20	CAAAGATCGATGGCTGTGAA	59.799	20	265	368785	369049
PT-369949-369950	ACGAGGAAGCAAGAACTGGA	59.989	20	GCCTCCTCGCTATTGACAAG	59.978	20	242	369757	369998	CAAGCAAAGCTGGACATTCA	59.988	20	GCCTCCTCGCTATTGACAAG	59.978	20	212	369787	369998	CAAGCAAAGCTGGACATTCA	59.988	20	TTCCTATTGCCTCCTCGCTA	59.938	20	220	369787	370006
PT-370644-370644	ACTTCAACCTTCGGTCATGG	59.966	20	TTCTTTCAGTCTCACGGGCT	59.989	20	282	370568	370849	AACCTTCGGTCATGGAACAG	59.966	20	TTCTTTCAGTCTCACGGGCT	59.989	20	277	370573	370849	AACCTTCGGTCATGGAACAG	59.966	20	CTTCTTTCAGTCTCACGGGC	59.989	20	278	370573	370850
PT-370762-370792	ACTTCAACCTTCGGTCATGG	59.966	20	TTCTTTCAGTCTCACGGGCT	59.989	20	282	370568	370849	AACCTTCGGTCATGGAACAG	59.966	20	TTCTTTCAGTCTCACGGGCT	59.989	20	277	370573	370849	AACCTTCGGTCATGGAACAG	59.966	20	CTTCTTTCAGTCTCACGGGC	59.989	20	278	370573	370850
PT-370913-370938	GCCCGTGAGACTGAAAGAAG	59.989	20	CAGAGGAGTTCGGTTGCATT	60.255	20	177	370831	371007	AGCCCGTGAGACTGAAAGAA	59.989	20	CAGAGGAGTTCGGTTGCATT	60.255	20	178	370830	371007	AGCCCGTGAGACTGAAAGAA	59.989	20	GACTGAAGACCGGGCACTTA	60.255	20	273	370830	371102
PT-371234-371234	TAGGCGGATTCATGTTGTCA	60.073	20	TGACCCTTTCTCTTGTGCCT	59.844	20	198	371166	371363	TAGGCGGATTCATGTTGTCA	60.073	20	GACCCTTTCTCTTGTGCCTG	59.844	20	197	371166	371362	TAGGCGGATTCATGTTGTCA	60.073	20	AATTTTATGCCTAGCCCCGT	59.829	20	154	371166	371319
PT-371422-371437	GCTCAATTCCAAAGCGTAGC	59.988	20	CAAAGGCGAGGTTCTGAAAG	59.986	20	260	371278	371537	CTGGTCTGCTTGGGTAGCTC	60.012	20	CAAAGGCGAGGTTCTGAAAG	59.986	20	276	371262	371537	GCTCAATTCCAAAGCGTAGC	59.988	20	TCTGAAAGAAAGCAAGCGGT	60.132	20	248	371278	371525
PT-371813-371813	AGATGCCCTGCCCTTCTAAT	60.06	20	GTTGCTTGTGCCTGCTGTTA	60.058	20	230	371642	371871	AGATGCCCTGCCCTTCTAAT	60.06	20	TTGCTTGTGCCTGCTGTTAC	60.058	20	229	371642	371870	CCTTCGACACAGGAGAAAGG	59.837	20	ACAAAGGCTGAGAAAGCCAA	59.993	20	294	371790	372083
PT-371914-371914	TAACAGCAGGCACAAGCAAC	60.058	20	ACAAAGGCTGAGAAAGCCAA	59.993	20	232	371852	372083	GTAACAGCAGGCACAAGCAA	60.058	20	ACAAAGGCTGAGAAAGCCAA	59.993	20	233	371851	372083	TAACAGCAGGCACAAGCAAC	60.058	20	AACAAAGGCTGAGAAAGCCA	59.993	20	233	371852	372084
PT-371947-371982	TAACAGCAGGCACAAGCAAC	60.058	20	ACAAAGGCTGAGAAAGCCAA	59.993	20	232	371852	372083	GTAACAGCAGGCACAAGCAA	60.058	20	ACAAAGGCTGAGAAAGCCAA	59.993	20	233	371851	372083	TAACAGCAGGCACAAGCAAC	60.058	20	AACAAAGGCTGAGAAAGCCA	59.993	20	233	371852	372084
PT-372027-372029	TAACAGCAGGCACAAGCAAC	60.058	20	ACAAAGGCTGAGAAAGCCAA	59.993	20	232	371852	372083	GTAACAGCAGGCACAAGCAA	60.058	20	ACAAAGGCTGAGAAAGCCAA	59.993	20	233	371851	372083	TAACAGCAGGCACAAGCAAC	60.058	20	AACAAAGGCTGAGAAAGCCA	59.993	20	233	371852	372084
PT-372090-372090	TGGCTTTCTCAGCCTTTGTT	59.993	20	TTCGCTTCCTTCGTCTCATT	59.955	20	294	372065	372358	TTGGCTTTCTCAGCCTTTGT	59.993	20	TTCGCTTCCTTCGTCTCATT	59.955	20	295	372064	372358	TGGCTTTCTCAGCCTTTGTT	59.993	20	GAAGGACAGGACCTCAGTCG	59.835	20	269	372065	372333
PT-372240-372240	TGGCTTTCTCAGCCTTTGTT	59.993	20	TTCGCTTCCTTCGTCTCATT	59.955	20	294	372065	372358	TTGGCTTTCTCAGCCTTTGT	59.993	20	TTCGCTTCCTTCGTCTCATT	59.955	20	295	372064	372358	GATTCTCACTGGGTTTCCGA	60.05	20	TTCGCTTCCTTCGTCTCATT	59.955	20	181	372178	372358
PT-372318-372327	TGGCTTTCTCAGCCTTTGTT	59.993	20	TTCGCTTCCTTCGTCTCATT	59.955	20	294	372065	372358	TTGGCTTTCTCAGCCTTTGT	59.993	20	TTCGCTTCCTTCGTCTCATT	59.955	20	295	372064	372358	GATTCTCACTGGGTTTCCGA	60.05	20	TTCGCTTCCTTCGTCTCATT	59.955	20	181	372178	372358
PT-372496-372497	CCCCCTCTACTCTAGGGTGC	60.088	20	CGGATTCACAGCTTGAGGTT	60.255	20	199	372455	372653	AATGAGACGAAGGAAGCGAA	59.955	20	TGATCTGAGGGAAGCAGTCC	60.349	20	274	372339	372612	GCTCTGGACTAGGATGGTGC	59.834	20	CGGATTCACAGCTTGAGGTT	60.255	20	253	372401	372653
PT-373844-373844	TCCACAGTTTCGTCACATCC	59.525	20	AGTAGGGGTTTCGCTTTGGT	59.998	20	230	373817	374046	CCGATCGGATGGATAAGAGA	59.991	20	GTTCAACGGGTTAGGAGGCT	60.496	20	285	373647	373931	TCCACAGTTTCGTCACATCC	59.525	20	TTCGCTTTGGTGCTATCCTT	59.845	20	221	373817	374037
PT-373927-374103	TGCGTTACATGAAATGAGGG	59.542	20	AAAGGGCCAAAGAGGAAAAA	60.048	20	294	373872	374165	TGCGTTACATGAAATGAGGG	59.542	20	AAAAGGGCCAAAGAGGAAAA	60.048	20	295	373872	374166	TGCGTTACATGAAATGAGGG	59.542	20	AAAAAGGGCCAAAGAGGAAA	60.048	20	296	373872	374167
PT-374138-374239	TGAAGCTCAAGGACGAATGA	59.522	20	GAAGAGCCAGCAGGTCAAAC	59.997	20	262	374108	374369	TGAAGCTCAAGGACGAATGA	59.522	20	GAGGGAGCAGTAGATCGTCG	59.973	20	285	374108	374392	TGAAGCTCAAGGACGAATGA	59.522	20	ATCGTCGATTGAAGAGCCAG	60.362	20	272	374108	374379
PT-374325-374335	TTTCCTCTTTGGCCCTTTTT	60.048	20	GAAGAGCCAGCAGGTCAAAC	59.997	20	222	374148	374369	TTTTCCTCTTTGGCCCTTTT	60.048	20	GAAGAGCCAGCAGGTCAAAC	59.997	20	223	374147	374369	TTTCCTCTTTGGCCCTTTTT	60.048	20	GAGGGAGCAGTAGATCGTCG	59.973	20	245	374148	374392
PT-374430-374431	TCGACGATCTACTGCTCCCT	59.973	20	ATATCCTCACCGACCGACTG	59.95	20	290	374372	374661	CGACGATCTACTGCTCCCTC	59.973	20	ATATCCTCACCGACCGACTG	59.95	20	289	374373	374661	CGACGATCTACTGCTCCCTC	59.973	20	ATTCCAAGAGCCAATGTTCG	60.074	20	230	374373	374602
PT-374480-374550	TCGACGATCTACTGCTCCCT	59.973	20	ATATCCTCACCGACCGACTG	59.95	20	290	374372	374661	CGACGATCTACTGCTCCCTC	59.973	20	ATATCCTCACCGACCGACTG	59.95	20	289	374373	374661	CGACGATCTACTGCTCCCTC	59.973	20	ATTCCAAGAGCCAATGTTCG	60.074	20	230	374373	374602
PT-374612-374636	TCGACGATCTACTGCTCCCT	59.973	20	ATATCCTCACCGACCGACTG	59.95	20	290	374372	374661	CGACGATCTACTGCTCCCTC	59.973	20	ATATCCTCACCGACCGACTG	59.95	20	289	374373	374661	CGAACATTGGCTCTTGGAAT	60.074	20	TGCACCATATGGATAAGCGA	60.058	20	227	374583	374809
PT-374691-374702	CGAACATTGGCTCTTGGAAT	60.074	20	TGCACCATATGGATAAGCGA	60.058	20	227	374583	374809	ATTCGAACATTGGCTCTTGG	60.074	20	TGCACCATATGGATAAGCGA	60.058	20	230	374580	374809	AAGCCATGAATCAGTCGGTC	60.081	20	TGCACCATATGGATAAGCGA	60.058	20	179	374631	374809
PT-374736-374795	AAGCCATGAATCAGTCGGTC	60.081	20	CTAGCTTTGTCCGAGTTGGG	59.869	20	292	374631	374922	TCCAACTCCCCTTGCTTCTA	59.807	20	CTAGCTTTGTCCGAGTTGGG	59.869	20	244	374679	374922	AAGCCATGAATCAGTCGGTC	60.081	20	CGAGTTGGGCAGAAGCTAGT	59.639	20	281	374631	374911
PT-374837-374837	AAGCCATGAATCAGTCGGTC	60.081	20	CTAGCTTTGTCCGAGTTGGG	59.869	20	292	374631	374922	TCCAACTCCCCTTGCTTCTA	59.807	20	CTAGCTTTGTCCGAGTTGGG	59.869	20	244	374679	374922	AAGCCATGAATCAGTCGGTC	60.081	20	CGAGTTGGGCAGAAGCTAGT	59.639	20	281	374631	374911
PT-374875-374875	AAGCCATGAATCAGTCGGTC	60.081	20	CTAGCTTTGTCCGAGTTGGG	59.869	20	292	374631	374922	TCCAACTCCCCTTGCTTCTA	59.807	20	CTAGCTTTGTCCGAGTTGGG	59.869	20	244	374679	374922	AAGCCATGAATCAGTCGGTC	60.081	20	CGAGTTGGGCAGAAGCTAGT	59.639	20	281	374631	374911
PT-375147-375175	AAAGTGTGCCAGTTTCGCTT	59.92	20	AGCTCTACCACCTTCTGCCA	60.012	20	220	374979	375198	TGACTTGCGAATGAATGGAG	59.799	20	GCTCGAGAGACCTGAACCTG	60.135	20	246	375050	375295	GTGACTTGCGAATGAATGGA	59.654	20	AGCTCTACCACCTTCTGCCA	60.012	20	150	375049	375198
PT-375248-375256	TGACTTGCGAATGAATGGAG	59.799	20	GCTCGAGAGACCTGAACCTG	60.135	20	246	375050	375295	GTAACAGCAAGGGTTAGCGG	59.769	20	GCTCGAGAGACCTGAACCTG	60.135	20	158	375138	375295	GGTAACAGCAAGGGTTAGCG	59.769	20	GCTCGAGAGACCTGAACCTG	60.135	20	159	375137	375295
PT-375326-375326	GTGGCAGAAGGTGGTAGAGC	59.874	20	AGTTTCCGAAAGAGGAAGGG	59.685	20	287	375178	375464	TACACAGTGGCAGAAGGTGG	59.745	20	AGTTTCCGAAAGAGGAAGGG	59.685	20	293	375172	375464	CACAGTGGCAGAAGGTGGTA	59.745	20	AGTTTCCGAAAGAGGAAGGG	59.685	20	291	375174	375464
PT-375768-375794	CGCTTAGCCGTCTACAAAGG	60.032	20	TTGAATCCATAAACCGCTCC	59.901	20	299	375602	375900	AGGCTCTTCCATTGGTTGTG	60.111	20	CCCAGAAAAGATGGGTTGAA	59.903	20	185	375731	375915	AGGCTCTTCCATTGGTTGTG	60.111	20	TTGAATCCATAAACCGCTCC	59.901	20	170	375731	375900
PT-375985-375985	AAGCCCAATCTGTGGTTTTG	59.971	20	CCGACACAGGGACCCTATTA	59.807	20	263	375925	376187	TCTGAGAGTCATTGGACCCC	60.048	20	AAGACGAGAGGATTGGGCTT	60.212	20	227	375859	376085	TTCAACCCATCTTTTCTGGG	59.903	20	CCGACACAGGGACCCTATTA	59.807	20	292	375896	376187
PT-376190-376190	TATCCACCGATGGGTCTTGT	60.195	20	GCTATATCGAAGCCCAATGC	59.671	20	242	376043	376284	TATCCACCGATGGGTCTTGT	60.195	20	AATCCAAGACCAGGAAAGCA	59.67	20	263	376043	376305	TATCCACCGATGGGTCTTGT	60.195	20	ATCCAAGACCAGGAAAGCAA	59.67	20	262	376043	376304
PT-376319-376319	TGCTTTCCTGGTCTTGGATT	59.67	20	GCGTTACAAGGAATTTTGGG	59.451	20	231	376286	376516	TTGCTTTCCTGGTCTTGGAT	59.67	20	GCGTTACAAGGAATTTTGGG	59.451	20	232	376285	376516	TGCTTTCCTGGTCTTGGATT	59.67	20	CGTTACAAGGAATTTTGGGC	59.451	20	230	376286	376515
PT-376913-376913	CCCCATATCGTGTTGTGCTA	59.42	20	GCCATCTCCGATGTCAATCT	60.042	20	281	376714	376994	TGTGGACGTTCAGATTGCAT	60.12	20	ACAGGAAGCGTCACAGCCTA	60.996	20	251	376771	377021	TCTGTGGACGTTCAGATTGC	59.837	20	ACAGGAAGCGTCACAGCCTA	60.996	20	253	376769	377021
PT-376979-376990	TGTGGACGTTCAGATTGCAT	60.12	20	ACAGGAAGCGTCACAGCCTA	60.996	20	251	376771	377021	TCTGTGGACGTTCAGATTGC	59.837	20	ACAGGAAGCGTCACAGCCTA	60.996	20	253	376769	377021	TGTGGACGTTCAGATTGCAT	60.12	20	CAGGAAGCGTCACAGCCTA	60.144	19	250	376771	377020
PT-377062-377062	CTGTGACGCTTCCTGTTGAG	59.616	20	AGCAGACCAGCCCACTTTTA	59.875	20	283	377006	377288	CTGCAGATTGACATCGGAGA	59.942	20	CTTTCTCGGTTGATGGATGG	60.452	20	224	376971	377194	CTGCAGATTGACATCGGAGA	59.942	20	CGGTTGATGGATGGGATAAA	60.523	20	218	376971	377188
PT-377230-377231	CCATCCATCAACCGAGAAAG	60.452	20	AGGTTGCGTTTCATTCCAAC	59.978	20	253	377175	377427	CCATCCATCAACCGAGAAAG	60.452	20	AATTATGTTCCGAGGTTGCG	59.96	20	265	377175	377439	CTGTGACGCTTCCTGTTGAG	59.616	20	AGCAGACCAGCCCACTTTTA	59.875	20	283	377006	377288
PT-377405-377424	ATGGAACAAGGCGTTTTGAA	60.481	20	TCGATCCCTTACCTTGATGC	60.036	20	282	377373	377654	AACAAGGCGTTTTGAACCAT	59.476	20	TCGATCCCTTACCTTGATGC	60.036	20	278	377377	377654	TAAAAGTGGGCTGGTCTGCT	59.875	20	TAGCTACACGAGGGAAAGCG	60.534	20	274	377269	377542
PT-377478-377505	GTTGGAATGAAACGCAACCT	59.978	20	TCGATCCCTTACCTTGATGC	60.036	20	247	377408	377654	GTTGGAATGAAACGCAACCT	59.978	20	CTTTCAACCAACCCCTTTGA	59.942	20	293	377408	377700	GTTGGAATGAAACGCAACCT	59.978	20	TCAACCAACCCCTTTGATTC	59.767	20	290	377408	377697
PT-377585-377614	GTTGGAATGAAACGCAACCT	59.978	20	TCGATCCCTTACCTTGATGC	60.036	20	247	377408	377654	GTTGGAATGAAACGCAACCT	59.978	20	CTTTCAACCAACCCCTTTGA	59.942	20	293	377408	377700	GTTGGAATGAAACGCAACCT	59.978	20	TCAACCAACCCCTTTGATTC	59.767	20	290	377408	377697
PT-377651-377683	ATTTCGCAGATTCTTGCCAT	59.674	20	GGTGGCTCCTCACATGAAAT	59.934	20	280	377590	377869	ATTTCGCAGATTCTTGCCAT	59.674	20	GTTCAGCGGTCTAAACCCAA	60.11	20	214	377590	377803	ATTTCGCAGATTCTTGCCAT	59.674	20	TTCAGCGGTCTAAACCCAAG	60.241	20	213	377590	377802
PT-377902-377909	GGGCTTTGAATTTGGACAGA	60.051	20	CTGAGTCGTCAAATGAGCCA	59.984	20	270	377876	378145	ATTTCATGTGAGGAGCCACC	59.934	20	CTGAGTCGTCAAATGAGCCA	59.984	20	296	377850	378145	TCAAAGGGGTTGGTTGAAAG	59.942	20	GAGCCCTACCCATCATCAAA	59.894	20	269	377681	377949
PT-378024-378024	GGGCTTTGAATTTGGACAGA	60.051	20	CTGAGTCGTCAAATGAGCCA	59.984	20	270	377876	378145	ATTTCATGTGAGGAGCCACC	59.934	20	CTGAGTCGTCAAATGAGCCA	59.984	20	296	377850	378145	GGGCTTTGAATTTGGACAGA	60.051	20	CACGTTAAGAAAGCCCAAGC	59.883	20	252	377876	378127
PT-378206-378232	TGGCTCATTTGACGACTCAG	59.984	20	GGATGGCAAGCACAATTCTT	60.081	20	239	378126	378364	GCTTGGGCTTTCTTAACGTG	59.883	20	GGATGGCAAGCACAATTCTT	60.081	20	257	378108	378364	GTGGCTCATTTGACGACTCA	59.837	20	GGATGGCAAGCACAATTCTT	60.081	20	240	378125	378364
PT-378317-378320	TGGCTCATTTGACGACTCAG	59.984	20	GGATGGCAAGCACAATTCTT	60.081	20	239	378126	378364	GCTTGGGCTTTCTTAACGTG	59.883	20	GGATGGCAAGCACAATTCTT	60.081	20	257	378108	378364	GTGGCTCATTTGACGACTCA	59.837	20	GGATGGCAAGCACAATTCTT	60.081	20	240	378125	378364
PT-378356-378356	AGAGCCAGCCAGTTTTTCAC	59.478	20	TGCAGGATTGATGACCAGAA	60.201	20	210	378274	378483	AGAGCCAGCCAGTTTTTCAC	59.478	20	TTGCAGGATTGATGACCAGA	60.201	20	211	378274	378484	GAGCCAGCCAGTTTTTCACT	59.478	20	TGCAGGATTGATGACCAGAA	60.201	20	209	378275	378483
PT-378394-378427	AAGAATTGTGCTTGCCATCC	60.081	20	AGGTGGAGAAAGACGGGAGT	60.111	20	233	378345	378577	AAGAATTGTGCTTGCCATCC	60.081	20	CCACGTCACGCTAGGATTTT	60.132	20	274	378345	378618	AAGAATTGTGCTTGCCATCC	60.081	20	ACGTCACGCTAGGATTTTGG	60.132	20	272	378345	378616
PT-378465-378467	AAGAATTGTGCTTGCCATCC	60.081	20	AGGTGGAGAAAGACGGGAGT	60.111	20	233	378345	378577	AAGAATTGTGCTTGCCATCC	60.081	20	CCACGTCACGCTAGGATTTT	60.132	20	274	378345	378618	AAGAATTGTGCTTGCCATCC	60.081	20	ACGTCACGCTAGGATTTTGG	60.132	20	272	378345	378616
PT-378625-378641	AAAATCCTAGCGTGACGTGG	60.132	20	AGAAAGCCTGTTTGCAGCAT	60.022	20	272	378599	378870	AAAATCCTAGCGTGACGTGG	60.132	20	AGCAATTGCAGAAAGCCTGT	60.022	20	281	378599	378879	ACTCCCGTCTTTCTCCACCT	60.111	20	TACGAATTGTATGGCTGGCA	60.096	20	186	378558	378743
PT-378701-378701	AAAATCCTAGCGTGACGTGG	60.132	20	AGAAAGCCTGTTTGCAGCAT	60.022	20	272	378599	378870	AAAATCCTAGCGTGACGTGG	60.132	20	AGCAATTGCAGAAAGCCTGT	60.022	20	281	378599	378879	ACTCCCGTCTTTCTCCACCT	60.111	20	TACGAATTGTATGGCTGGCA	60.096	20	186	378558	378743
PT-378734-378734	AAAATCCTAGCGTGACGTGG	60.132	20	AGAAAGCCTGTTTGCAGCAT	60.022	20	272	378599	378870	AAAATCCTAGCGTGACGTGG	60.132	20	AGCAATTGCAGAAAGCCTGT	60.022	20	281	378599	378879	CCTTCCAAAATCCTAGCGTG	59.702	20	AGAAAGCCTGTTTGCAGCAT	60.022	20	278	378593	378870
PT-378794-378799	AAAATCCTAGCGTGACGTGG	60.132	20	AGAAAGCCTGTTTGCAGCAT	60.022	20	272	378599	378870	AAAATCCTAGCGTGACGTGG	60.132	20	AGCAATTGCAGAAAGCCTGT	60.022	20	281	378599	378879	CTCAGATTGTGCCAGCCATA	59.823	20	AGAAAGCCTGTTTGCAGCAT	60.022	20	156	378715	378870
PT-378895-378944	CTCAGATTGTGCCAGCCATA	59.823	20	TTCCTTGCAGGATCCATTGT	60.461	20	260	378715	378974	CTCAGATTGTGCCAGCCATA	59.823	20	TCCTTGCAGGATCCATTGTT	60.461	20	259	378715	378973	ATGCTGCAAACAGGCTTTCT	60.022	20	CACAATTAGGGCTTCCTGCT	59.336	20	215	378851	379065
PT-379022-379035	ATGCTGCAAACAGGCTTTCT	60.022	20	CACAATTAGGGCTTCCTGCT	59.336	20	215	378851	379065	TATGGCTATGGATGCTGCAA	60.201	20	CACAATTAGGGCTTCCTGCT	59.336	20	226	378840	379065	GGGCAATTGCAAAATCAAAT	59.779	20	CACAATTAGGGCTTCCTGCT	59.336	20	177	378889	379065
PT-379077-379084	AGCAGGAAGCCCTAATTGTG	59.336	20	CCAGGGGTTTTACCATACCA	59.541	20	261	379046	379306	GGAGCAGGAAGCCCTAATTG	61.08	20	CCAGGGGTTTTACCATACCA	59.541	20	263	379044	379306	GGGATTTGGAGAAGAGACTGC	60.205	21	CCAGGGGTTTTACCATACCA	59.541	20	297	379010	379306
PT-379240-379252	AATTGTGCGTGCTGTCACTC	59.912	20	CCAGGGGTTTTACCATACCA	59.541	20	248	379059	379306	AGCAGGAAGCCCTAATTGTG	59.336	20	CCAGGGGTTTTACCATACCA	59.541	20	261	379046	379306	AATTGTGCGTGCTGTCACTC	59.912	20	CCAGGGGTTTTACCATACCAT	59.822	21	248	379059	379306
PT-379305-379332	ACTCAGGTGCCTACTGGAGA	57.447	20	TCATCATAGGTAAGGCAAAGCA	59.742	22	252	379213	379464	GGTCACCGGGGAGACTAGA	60.056	19	TTGTAGTAATTCTGGGAAAAAGGC	59.912	24	298	379081	379378	TCCGTCGACTCTTTTGAGTTT	58.969	21	CCCACCTTTTTCTAAAAGTGCT	58.865	22	291	379109	379399
PT-379500-379511	TGGTATGGTAAAACCCCTGG	59.541	20	TTCTTTTGAGAAAAGCCCCC	60.534	20	255	379287	379541	ATGGTATGGTAAAACCCCTGG	59.822	21	TTCTTTTGAGAAAAGCCCCC	60.534	20	256	379286	379541	TGGTATGGTAAAACCCCTGGT	60.338	21	TTCTTTTGAGAAAAGCCCCC	60.534	20	255	379287	379541
PT-379560-379560	TGCTTTGCCTTACCTATGATGA	59.742	22	GGAGGTGCGAAGTGGATAAA	60.074	20	170	379443	379612	TGCTTTGCCTTACCTATGATGA	59.742	22	TTGGGCCAAGGAAACATAAC	59.801	20	201	379443	379643	TGCTTTGCCTTACCTATGATGA	59.742	22	GTTGGGCCAAGGAAACATAA	59.801	20	202	379443	379644
PT-379605-379617	TGACCATGAATTGAACGAACTC	59.978	22	ATGATACGAAGGGGATGTGG	59.629	20	236	379544	379779	TGCTTTGCCTTACCTATGATGA	59.742	22	TTGGGCCAAGGAAACATAAC	59.801	20	201	379443	379643	TGCTTTGCCTTACCTATGATGA	59.742	22	GTTGGGCCAAGGAAACATAA	59.801	20	202	379443	379644
PT-379746-379755	TTTATCCACTTCGCACCTCC	60.074	20	GCCTTGTGTCGAGTGATGAA	59.837	20	266	379593	379858	TTTATCCACTTCGCACCTCC	60.074	20	TGGCTCCTGGGTGAAGTTAG	60.246	20	299	379593	379891	TTTATCCACTTCGCACCTCC	60.074	20	ATGCCTTGTGTCGAGTGATG	59.707	20	268	379593	379860
PT-379823-379823	TTTATCCACTTCGCACCTCC	60.074	20	GCCTTGTGTCGAGTGATGAA	59.837	20	266	379593	379858	TTTATCCACTTCGCACCTCC	60.074	20	TGGCTCCTGGGTGAAGTTAG	60.246	20	299	379593	379891	TTTATCCACTTCGCACCTCC	60.074	20	ATGCCTTGTGTCGAGTGATG	59.707	20	268	379593	379860
PT-379864-379873	TTCATCACTCGACACAAGGC	59.837	20	TTGGGGAAAATCTCCTTCCT	59.875	20	298	379839	380136	TTCATCACTCGACACAAGGC	59.837	20	TTTGGGGAAAATCTCCTTCC	60.237	20	299	379839	380137	CATCACTCGACACAAGGCAT	59.707	20	TTGGGGAAAATCTCCTTCCT	59.875	20	296	379841	380136
PT-379929-379976	TTCATCACTCGACACAAGGC	59.837	20	TTGGGGAAAATCTCCTTCCT	59.875	20	298	379839	380136	CTAACTTCACCCAGGAGCCA	60.246	20	TTGGGGAAAATCTCCTTCCT	59.875	20	265	379872	380136	TTCATCACTCGACACAAGGC	59.837	20	TTTGGGGAAAATCTCCTTCC	60.237	20	299	379839	380137
PT-380035-380081	ACGTTCCTGCCGAATAATTG	59.96	20	TTGGGGAAAATCTCCTTCCT	59.875	20	209	379928	380136	ACGTTCCTGCCGAATAATTG	59.96	20	CAAACCATACCCAATCGAGG	60.184	20	276	379928	380203	ACGTTCCTGCCGAATAATTG	59.96	20	TTTGGGGAAAATCTCCTTCC	60.237	20	210	379928	380137
PT-380203-380203	AGATTCGAACCCTGTCGATG	60.073	20	ACGCTTTTCCATCTAAGCGA	59.982	20	279	380144	380422	ATTCGCCTATTCGCATGAGT	59.696	20	GATCTAGCGGTGCTCTGACC	59.981	20	171	380092	380262	ATTCGAACCCTGTCGATGAA	60.461	20	ACGCTTTTCCATCTAAGCGA	59.982	20	277	380146	380422
PT-380774-380780	ATTATTGAGCGTCTGGGCAC	60.103	20	GAGCAGAACATGGCATCGTA	59.83	20	200	380750	380949	CTAAGACGGCTCGCCTAAGA	59.747	20	GAGCAGAACATGGCATCGTA	59.83	20	297	380653	380949	TAAGACGGCTCGCCTAAGAC	59.615	20	GAGCAGAACATGGCATCGTA	59.83	20	296	380654	380949
PT-380883-380883	ATTATTGAGCGTCTGGGCAC	60.103	20	GAGCAGAACATGGCATCGTA	59.83	20	200	380750	380949	CTAAGACGGCTCGCCTAAGA	59.747	20	GAGCAGAACATGGCATCGTA	59.83	20	297	380653	380949	GTTGTAGTTCTCCATCCCGC	59.556	20	ACTTCCACCCAACAACAAGC	60.012	20	262	380837	381098
PT-380952-380953	GTTGTAGTTCTCCATCCCGC	59.556	20	ACTTCCACCCAACAACAAGC	60.012	20	262	380837	381098	GTTGTAGTTCTCCATCCCGC	59.556	20	ACAACAAGCCCCAAAAACAA	60.378	20	251	380837	381087	GTTGTAGTTCTCCATCCCGC	59.556	20	AACAACAAGCCCCAAAAACA	60.378	20	252	380837	381088
PT-381085-381173	ACTAGGCTTGTTTTTGGGGC	60.483	20	GGCCTTAGGAGCCCTTATGT	59.576	20	279	381061	381339	ACTAGGCTTGTTTTTGGGGC	60.483	20	AGGAGCCCTTATGTGGATGA	59.508	20	273	381061	381333	CTAGGCTTGTTTTTGGGGCT	60.603	20	GGCCTTAGGAGCCCTTATGT	59.576	20	278	381062	381339
PT-381306-381377	TCCCCTAACGCTAGACTGACA	59.883	21	CGGTTTCTGGTTTGCCTTTA	60.103	20	217	381279	381495	TCCCCTAACGCTAGACTGACA	59.883	21	CTGTGCAGATCAACACTCGG	60.463	20	253	381279	381531	CCCCTAACGCTAGACTGACAA	59.387	21	CGGTTTCTGGTTTGCCTTTA	60.103	20	216	381280	381495
PT-381500-381558	TAAAGGCAAACCAGAAACCG	60.103	20	GACTAACGGCGTACCTGAGC	59.904	20	154	381476	381629	TAAAGGCAAACCAGAAACCG	60.103	20	GTTCCGCTCTTCGTGATTGT	60.263	20	229	381476	381704	GAATTCCGATGATGTTTGCC	60.282	20	GACTAACGGCGTACCTGAGC	59.904	20	213	381417	381629
PT-381658-381709	CAGGCATGAGTGCTCAGGTA	60.008	20	ATGTGTCGCTCGAGGTCTCT	60.017	20	259	381599	381857	GCTCAGGTACGCCGTTAGTC	59.904	20	ATGTGTCGCTCGAGGTCTCT	60.017	20	248	381610	381857	GCTCAGGTACGCCGTTAGTC	59.904	20	CTCGAGCCTCCTGTTGTACC	59.867	20	230	381610	381839
PT-381806-381806	CAGGCATGAGTGCTCAGGTA	60.008	20	ATGTGTCGCTCGAGGTCTCT	60.017	20	259	381599	381857	GCTCAGGTACGCCGTTAGTC	59.904	20	ATGTGTCGCTCGAGGTCTCT	60.017	20	248	381610	381857	CAGCCTGTCGTAACAACGAA	59.904	20	TTCAGGGGGAGGACTTTCTT	60.045	20	209	381748	381956
PT-382728-382733	CGTAAACGTCACAACCGATG	60.027	20	GCCTTGGTACGGCCTATACA	59.982	20	288	382618	382905	CCCTCTCAGCAGCTATCCAC	59.973	20	TCTCAAGGCTGCTACCGATT	59.978	20	248	382533	382780	ACCCTCTCAGCAGCTATCCA	59.973	20	TCTCAAGGCTGCTACCGATT	59.978	20	249	382532	382780
PT-383331-383335	AGCATCCACCGGTAATGTGT	60.263	20	TTGGGTAGAAGGTGACGACC	59.966	20	261	383185	383445	AGCATCCACCGGTAATGTGT	60.263	20	TTCCTTCATCGTTATTGCCC	59.901	20	193	383185	383377	CGGTAATGTGTGGAAGAGGG	60.366	20	TTGGGTAGAAGGTGACGACC	59.966	20	252	383194	383445
PT-383968-383968	TCTATTGCCTGCCGGTTATC	60.06	20	AGTCGAACTCGCTCTCTTGC	59.898	20	211	383943	384153	TCTATTGCCTGCCGGTTATC	60.06	20	CGAGTCGAACTCGCTCTCTT	59.891	20	213	383943	384155	AACTTATGACCTCGCGGATG	60.096	20	GCGATTCGTACTACCGGAAA	60.096	20	243	383749	383991
PT-384705-384710	ATCCACGTGTTCCTAGTCGG	59.989	20	AGGGCAAGCAGCTTTCATTA	59.982	20	179	384573	384751	TAGTCGGGCCTAAATGGATG	59.916	20	AGGGCAAGCAGCTTTCATTA	59.982	20	166	384586	384751	ATCCACGTGTTCCTAGTCGG	59.989	20	GATAGCCCGGTTTTGATTGA	59.901	20	286	384573	384858
PT-385993-386000	TGCCTTGGGTAAATGCCTAC	59.96	20	GAAGTCTGGGGACAACGGTA	59.966	20	252	385820	386071	GTGCCTTGGGTAAATGCCTA	59.96	20	GAAGTCTGGGGACAACGGTA	59.966	20	253	385819	386071	ATGCCTACCTTCGGGAGAAT	59.925	20	GAAGTCTGGGGACAACGGTA	59.966	20	240	385832	386071
PT-387384-387390	GAGGGGGACTTGTTCTGTGA	60.088	20	CATTTTGTTCGCCCACTCTT	60.11	20	189	387349	387537	TGACTGAGGGGGACTTGTTC	60.088	20	CATTTTGTTCGCCCACTCTT	60.11	20	194	387344	387537	TGCTCAGGATGAGTGTCTGG	59.98	20	AGGGTGGTTAGAATCAGGGG	60.183	20	300	387213	387512
PT-388169-388174	GAGATGTCTTTGGGAGCAGC	59.957	20	GGAACCCCTTTCTCTTACGG	59.934	20	242	388044	388285	TTTGGGAGCAGCTAAAGGAA	59.953	20	GGAACCCCTTTCTCTTACGG	59.934	20	234	388052	388285	GAGATGTCTTTGGGAGCAGC	59.957	20	ATGCAGGAACCCCTTTCTCT	60.074	20	247	388044	388290
PT-388295-388301	TTCCTTCTCAATCAATGCCC	60.014	20	TCGGATGCTTTATCCAATCC	59.862	20	226	388174	388399	CCGTAAGAGAAAGGGGTTCC	59.934	20	GTCAGGTCCAGAACAAGGGA	60.088	20	264	388266	388529	CCGTAAGAGAAAGGGGTTCC	59.934	20	TCAGGTCCAGAACAAGGGAC	60.088	20	263	388266	388528
PT-388543-388548	GGATTGGATAAAGCATCCGA	59.862	20	ATTACACCCCAAGGGAAACC	59.919	20	262	388380	388641	GGATTGGATAAAGCATCCGA	59.862	20	AGCAGCGAAGAGCCATTAAA	60.117	20	242	388380	388621	GATAAAGCATCCGAGTTCGC	59.813	20	ATTACACCCCAAGGGAAACC	59.919	20	256	388386	388641
PT-388635-388641	TCCCTTGTTCTGGACCTGAC	60.088	20	AAGGCTAGTAAGTTCGGGGC	59.747	20	156	388510	388665	TTTAATGGCTCTTCGCTGCT	60.117	20	TGATTGAGGTTGGGAAAACC	59.767	20	233	388602	388834	CTTTAATGGCTCTTCGCTGC	60.117	20	TGATTGAGGTTGGGAAAACC	59.767	20	234	388601	388834
PT-389345-389350	CAGGCTGAGGAATCCCATTA	60.029	20	GGAATCGTACCTTCGGACAA	59.933	20	296	389186	389481	TATGGGTGAGGGATAGCTCG	60.051	20	GGAATCGTACCTTCGGACAA	59.933	20	257	389225	389481	CAGGCTGAGGAATCCCATTA	60.029	20	GATGGGGAATGAACTCCAGA	59.862	20	265	389186	389450
PT-389600-389600	TTGTCCGAAGGTACGATTCC	59.933	20	AAAACAAGCATCCATCTCGG	60.074	20	300	389462	389761	GTAAGGGCAATCAAAGCCAA	60.074	20	AAAACAAGCATCCATCTCGG	60.074	20	224	389538	389761	TTTCTTTCGAGGGTTGAGGA	59.784	20	AAAACAAGCATCCATCTCGG	60.074	20	254	389508	389761
PT-391274-391275	TTCCGTTCCCTCGTTTACTG	60.103	20	GCAGAAAAGCATTCCACCTC	59.82	20	297	391136	391432	TTCCGTTCCCTCGTTTACTG	60.103	20	ATTCAAGTTAGCCCAAGCCA	59.708	20	239	391136	391374	TTTCCCTTGACTCGCCTCTA	59.948	20	TAGCTGCCAGTGATGATGGA	60.376	20	282	391063	391344
PT-392583-392635	GCAGTTCTGGGCAGTCTTTC	59.997	20	CGCTCACTGGAGAAAGGAAG	60.126	20	261	392440	392700	GCAGTTCTGGGCAGTCTTTC	59.997	20	CTAAAAGCCCTCGCTCACTG	60.147	20	272	392440	392711	GCAGTTCTGGGCAGTCTTTC	59.997	20	CTTCTAAAAGCCCTCGCTCA	59.724	20	275	392440	392714
PT-392814-392815	CTTCCTTTCTCCAGTGAGCG	60.126	20	GAAGGAAGACCAGGAAAGGG	60.045	20	207	392681	392887	CAGTGAGCGAGGGCTTTTAG	60.147	20	GAAGGAAGACCAGGAAAGGG	60.045	20	196	392692	392887	CTTCCTTTCTCCAGTGAGCG	60.126	20	CAGGAAAGGGCCTACAACAA	60.103	20	197	392681	392877
PT-393129-393129	TCCGGTAGTTAAGCGAGGAA	59.839	20	CCTGAAACAAACGACGGACT	60.149	20	158	393078	393235	TCCGGTAGTTAAGCGAGGAA	59.839	20	AAACGACGGACTTGATTGCT	59.74	20	150	393078	393227	GAAGCTTCGTCTTGAGCTGG	60.277	20	CCTGAAACAAACGACGGACT	60.149	20	247	392989	393235
PT-393286-393286	AGTCCGTCGTTTGTTTCAGG	60.149	20	TACCGATCCGTTAAAGGCAG	60.089	20	292	393216	393507	AGCAATCAAGTCCGTCGTTT	59.74	20	TACCGATCCGTTAAAGGCAG	60.089	20	300	393208	393507	AGCAATCAAGTCCGTCGTTT	59.74	20	CTTGCCGCAACTAACAACAA	59.911	20	219	393208	393426
PT-393393-393393	AGTCCGTCGTTTGTTTCAGG	60.149	20	TACCGATCCGTTAAAGGCAG	60.089	20	292	393216	393507	AGCAATCAAGTCCGTCGTTT	59.74	20	TACCGATCCGTTAAAGGCAG	60.089	20	300	393208	393507	AGCAATCAAGTCCGTCGTTT	59.74	20	CTTGCCGCAACTAACAACAA	59.911	20	219	393208	393426
PT-393539-393539	GGAGGTAGCTTCCCCATAGC	60.06	20	ACATGGAGGAAGAGCATTGG	60.073	20	220	393377	393596	CTTCTTTCGCCCTAGGGAAT	59.682	20	ACATGGAGGAAGAGCATTGG	60.073	20	266	393331	393596	TGTTGTTAGTTGCGGCAAGA	60.436	20	ACATGGAGGAAGAGCATTGG	60.073	20	189	393408	393596
PT-393593-393593	TGTTGTAGTCCCCTTCTGCC	60.111	20	TTTCTTCCCGATACAGTGCC	60.074	20	293	393539	393831	TGTTGTAGTCCCCTTCTGCC	60.111	20	CCGATACAGTGCCACTCCTT	60.134	20	286	393539	393824	TGTTGTAGTCCCCTTCTGCC	60.111	20	GCCACTCCTTTCATCTTTGG	59.67	20	276	393539	393814
PT-393706-393706	CCAATGCTCTTCCTCCATGT	60.073	20	TTTCTTCCCGATACAGTGCC	60.074	20	255	393577	393831	TGTTGTAGTCCCCTTCTGCC	60.111	20	TTTCTTCCCGATACAGTGCC	60.074	20	293	393539	393831	CCAATGCTCTTCCTCCATGT	60.073	20	CCGATACAGTGCCACTCCTT	60.134	20	248	393577	393824
PT-394046-394046	GGCACTGTATCGGGAAGAAA	60.074	20	TTGGAAACCAAATCCATCGT	60.17	20	262	393812	394073	CAGTCACTCGCCCATTCTTT	60.255	20	ATTGGACACCCAAGACGAAG	59.966	20	196	393954	394149	CAGTCACTCGCCCATTCTTT	60.255	20	CAACCAGCCTATCCGTCATT	59.955	20	213	393954	394166
PT-394329-394329	CTTCGTCTTGGGTGTCCAAT	59.966	20	CCACGGGATGAATACTGACC	60.195	20	254	394130	394383	CTTCGTCTTGGGTGTCCAAT	59.966	20	GTGCACAAGCGTATACCACG	60.203	20	269	394130	394398	AATGACGGATAGGCTGGTTG	59.955	20	CCACGGGATGAATACTGACC	60.195	20	237	394147	394383
PT-394367-394372	CTTCGTCTTGGGTGTCCAAT	59.966	20	GTGCACAAGCGTATACCACG	60.203	20	269	394130	394398	AATGACGGATAGGCTGGTTG	59.955	20	GTGCACAAGCGTATACCACG	60.203	20	252	394147	394398	CAATGACGGATAGGCTGGTT	59.955	20	GTGCACAAGCGTATACCACG	60.203	20	253	394146	394398
PT-394425-394425	GTTTGCTACGTTGGACCCAT	59.859	20	AACGGACCTATCCACGTCAC	59.851	20	244	394285	394528	GGTCAGTATTCATCCCGTGG	60.195	20	AACGGACCTATCCACGTCAC	59.851	20	165	394364	394528	GGTCAGTATTCATCCCGTGG	60.195	20	CTTGGCAAGCCATACCTCTC	59.836	20	222	394364	394585
PT-394641-394641	GTGACGTGGATAGGTCCGTT	59.851	20	GTCTTCGGCTTCGAGAAATG	59.955	20	285	394509	394793	GTGACGTGGATAGGTCCGTT	59.851	20	TCTTCGGCTTCGAGAAATGT	59.955	20	284	394509	394792	GTGACGTGGATAGGTCCGTT	59.851	20	GTTCAGATGGGAATGCGTCT	60.081	20	223	394509	394731
PT-394863-394868	CATTTCTCGAAGCCGAAGAC	59.955	20	GACGGACGGACCTAGTTCAA	60.111	20	252	394774	395025	ACATTTCTCGAAGCCGAAGA	59.955	20	GACGGACGGACCTAGTTCAA	60.111	20	253	394773	395025	CATTTCTCGAAGCCGAAGAC	59.955	20	TCAACATGTTAACCGAGCCA	60.111	20	236	394774	395009
PT-394911-394911	CATTTCTCGAAGCCGAAGAC	59.955	20	GACGGACGGACCTAGTTCAA	60.111	20	252	394774	395025	ACATTTCTCGAAGCCGAAGA	59.955	20	GACGGACGGACCTAGTTCAA	60.111	20	253	394773	395025	CATTTCTCGAAGCCGAAGAC	59.955	20	TCAACATGTTAACCGAGCCA	60.111	20	236	394774	395009
PT-394946-394946	CATTTCTCGAAGCCGAAGAC	59.955	20	GACGGACGGACCTAGTTCAA	60.111	20	252	394774	395025	ACATTTCTCGAAGCCGAAGA	59.955	20	GACGGACGGACCTAGTTCAA	60.111	20	253	394773	395025	CATTTCTCGAAGCCGAAGAC	59.955	20	TCAACATGTTAACCGAGCCA	60.111	20	236	394774	395009
PT-395194-395217	AAGCTCAGCTCGCGTACTTC	59.927	20	CTATCAAAAGATTGGGCGGA	60.031	20	293	395057	395349	AAGCTCAGCTCGCGTACTTC	59.927	20	ATTGGGCGGAACTTTTTCTT	59.945	20	283	395057	395339	AAGCTCAGCTCGCGTACTTC	59.927	20	AAGATTGGGCGGAACTTTTT	59.945	20	286	395057	395342
PT-395362-395362	TCCGCCCAATCTTTTGATAG	60.031	20	GCATCAGTCGACTCTGTGGA	59.988	20	279	395330	395608	AAGAAAAAGTTCCGCCCAAT	59.945	20	GCATCAGTCGACTCTGTGGA	59.988	20	289	395320	395608	AAGGTGGAGGATAGGTGGCT	59.957	20	TCGTCTGATCGGAATCACTG	59.787	20	208	395183	395390
PT-395659-395659	TGATCAGCAGAACTGGCATC	59.95	20	CTGGAGGAGAGAAGCCTGAA	59.673	20	295	395396	395690	TGATCAGCAGAACTGGCATC	59.95	20	TGGAGGAGAGAAGCCTGAAG	59.673	20	294	395396	395689	TTCGTCGAATTCACCTCTCC	60.195	20	CATTTGACCGAGTGGAGACA	59.676	20	252	395486	395737
PT-395753-395753	TGTCTCCACTCGGTCAAATG	59.676	20	CACCAGAGCAAGCACCAATA	59.864	20	183	395718	395900	CTTCAGGCTTCTCTCCTCCA	59.673	20	CACCAGAGCAAGCACCAATA	59.864	20	231	395670	395900	TTCAGGCTTCTCTCCTCCAG	59.673	20	CACCAGAGCAAGCACCAATA	59.864	20	230	395671	395900
PT-395800-395801	TGTCTCCACTCGGTCAAATG	59.676	20	CACCAGAGCAAGCACCAATA	59.864	20	183	395718	395900	CTTCAGGCTTCTCTCCTCCA	59.673	20	CACCAGAGCAAGCACCAATA	59.864	20	231	395670	395900	TTCAGGCTTCTCTCCTCCAG	59.673	20	CACCAGAGCAAGCACCAATA	59.864	20	230	395671	395900
PT-395841-395841	TGTCTCCACTCGGTCAAATG	59.676	20	CACCAGAGCAAGCACCAATA	59.864	20	183	395718	395900	CTTCAGGCTTCTCTCCTCCA	59.673	20	CACCAGAGCAAGCACCAATA	59.864	20	231	395670	395900	TTCAGGCTTCTCTCCTCCAG	59.673	20	CACCAGAGCAAGCACCAATA	59.864	20	230	395671	395900
PT-395926-395944	TATTGGTGCTTGCTCTGGTG	59.864	20	GCATTCTCCTTCCTTCCCTC	60.154	20	240	395881	396120	TGCTATTGGTGCTTGCTCTG	60.157	20	GCATTCTCCTTCCTTCCCTC	60.154	20	243	395878	396120	CAACTGCTATTGGTGCTTGC	59.493	20	GCATTCTCCTTCCTTCCCTC	60.154	20	247	395874	396120
PT-396031-396050	TATTGGTGCTTGCTCTGGTG	59.864	20	GCATTCTCCTTCCTTCCCTC	60.154	20	240	395881	396120	TGCTATTGGTGCTTGCTCTG	60.157	20	GCATTCTCCTTCCTTCCCTC	60.154	20	243	395878	396120	CAACTGCTATTGGTGCTTGC	59.493	20	GCATTCTCCTTCCTTCCCTC	60.154	20	247	395874	396120
PT-396177-396183	GAGGGAAGGAAGGAGAATGC	60.154	20	AGTGGTTATTGAGTTCGCGG	60.132	20	262	396101	396362	GAGGGAAGGAAGGAGAATGC	60.154	20	AGTTCGCGGAACACAAACTT	59.78	20	251	396101	396351	GAGGGAAGGAAGGAGAATGC	60.154	20	CCCAATTCAACTACATCCGC	60.331	20	295	396101	396395
PT-396270-396275	AAACTTCAAGCGAGCAGAGG	59.757	20	CCATTCATCTCGATTTGGCT	60.036	20	292	396211	396502	GAGGGAAGGAAGGAGAATGC	60.154	20	AGTGGTTATTGAGTTCGCGG	60.132	20	262	396101	396362	TCAAGCGAGCAGAGGAAACT	60.277	20	CCATTCATCTCGATTTGGCT	60.036	20	287	396216	396502
PT-396418-396418	CCGCGAACTCAATAACCACT	60.132	20	CCATTCATCTCGATTTGGCT	60.036	20	160	396343	396502	AAACTTCAAGCGAGCAGAGG	59.757	20	CCATTCATCTCGATTTGGCT	60.036	20	292	396211	396502	TGTGTTCCGCGAACTCAATA	60.257	20	CCATTCATCTCGATTTGGCT	60.036	20	166	396337	396502
PT-396822-396827	TGAATTTGATTAGCCCCTGC	60.038	20	GCAAGGCCTTTTCTCCTCTT	59.962	20	175	396761	396935	CCCTGCAGGAATTGAACCTA	60.066	20	GCAAGGCCTTTTCTCCTCTT	59.962	20	161	396775	396935	TGAATTTGATTAGCCCCTGC	60.038	20	CAGCTCCAAGCTGAAAGGAC	60.134	20	264	396761	397024
PT-396967-396967	CTTCGATTCCACCCACTGAT	59.927	20	TCAGAACTTGCAGGCCTTTT	59.993	20	214	396876	397089	TGAATTTGATTAGCCCCTGC	60.038	20	CAGCTCCAAGCTGAAAGGAC	60.134	20	264	396761	397024	TGAATTTGATTAGCCCCTGC	60.038	20	CAAACTCGCCAAACAGATCA	59.84	20	291	396761	397051
PT-397009-397013	CTTCGATTCCACCCACTGAT	59.927	20	TCAGAACTTGCAGGCCTTTT	59.993	20	214	396876	397089	TGAATTTGATTAGCCCCTGC	60.038	20	CAAACTCGCCAAACAGATCA	59.84	20	291	396761	397051	GCCACCTGATTCGGAGTAGA	60.218	20	TCAGAACTTGCAGGCCTTTT	59.993	20	249	396841	397089
PT-397058-397058	CTTCGATTCCACCCACTGAT	59.927	20	TCAGAACTTGCAGGCCTTTT	59.993	20	214	396876	397089	GCCACCTGATTCGGAGTAGA	60.218	20	TCAGAACTTGCAGGCCTTTT	59.993	20	249	396841	397089	TTTCAGCTTGGAGCTGGAGT	60.134	20	CCCTGCTGCTACAAATGGAT	60.096	20	253	397009	397261
PT-397142-397142	GGCCTGCAAGTTCTGACTTC	59.997	20	AGTGAGCGGACCTACTCGAA	60.012	20	260	397074	397333	AAAAGGCCTGCAAGTTCTGA	59.993	20	GTGAGCGGACCTACTCGAAG	60.012	20	263	397070	397332	AAAAGGCCTGCAAGTTCTGA	59.993	20	AGTGAGCGGACCTACTCGAA	60.012	20	264	397070	397333
PT-397240-397240	GGCCTGCAAGTTCTGACTTC	59.997	20	AGTGAGCGGACCTACTCGAA	60.012	20	260	397074	397333	AAAAGGCCTGCAAGTTCTGA	59.993	20	GTGAGCGGACCTACTCGAAG	60.012	20	263	397070	397332	AAAAGGCCTGCAAGTTCTGA	59.993	20	AGTGAGCGGACCTACTCGAA	60.012	20	264	397070	397333
PT-397351-397351	CTTCGAGTAGGTCCGCTCAC	60.012	20	CTCTCCACCGACGTACCATT	59.989	20	218	397313	397530	TTCGAGTAGGTCCGCTCACT	60.012	20	CTCTCCACCGACGTACCATT	59.989	20	217	397314	397530	CTTCGAGTAGGTCCGCTCAC	60.012	20	ATTGAAGCAGGAATGCAACC	60.081	20	201	397313	397513
PT-397422-397422	CTTCGAGTAGGTCCGCTCAC	60.012	20	CTCTCCACCGACGTACCATT	59.989	20	218	397313	397530	TTCGAGTAGGTCCGCTCACT	60.012	20	CTCTCCACCGACGTACCATT	59.989	20	217	397314	397530	ATCGCTTTTCGGCTGTTCTA	59.982	20	CTCTCCACCGACGTACCATT	59.989	20	153	397378	397530
PT-397484-397484	CTTCGAGTAGGTCCGCTCAC	60.012	20	CTCTCCACCGACGTACCATT	59.989	20	218	397313	397530	TTCGAGTAGGTCCGCTCACT	60.012	20	CTCTCCACCGACGTACCATT	59.989	20	217	397314	397530	ATCGCTTTTCGGCTGTTCTA	59.982	20	CTCTCCACCGACGTACCATT	59.989	20	153	397378	397530
PT-397589-397589	AATGGTACGTCGGTGGAGAG	59.989	20	CCACGTGGAGGAACCAGTAT	59.844	20	193	397511	397703	AGGGCGGTATATGCAATGAG	59.945	20	CCACGTGGAGGAACCAGTAT	59.844	20	293	397411	397703	GGTTGCATTCCTGCTTCAAT	60.081	20	CCACGTGGAGGAACCAGTAT	59.844	20	210	397494	397703
PT-398144-398150	GATGCACCGATTGAGCCTAT	60.066	20	AAAACCTGCATGGTCCACTC	59.973	20	218	398080	398297	GATGCACCGATTGAGCCTAT	60.066	20	CCTGAGAGCCAATGAAGAGG	59.943	20	278	398080	398357	GATGCACCGATTGAGCCTAT	60.066	20	ATGGTCCACTCGTGAAGAGG	60.112	20	209	398080	398288
PT-398186-398225	GATGCACCGATTGAGCCTAT	60.066	20	AAAACCTGCATGGTCCACTC	59.973	20	218	398080	398297	GATGCACCGATTGAGCCTAT	60.066	20	CCTGAGAGCCAATGAAGAGG	59.943	20	278	398080	398357	GATGCACCGATTGAGCCTAT	60.066	20	ATGGTCCACTCGTGAAGAGG	60.112	20	209	398080	398288
PT-398487-398487	ACTTGAAATCCGCCACTGAC	60.119	20	CACCCAGAATGGCATAATCC	60.155	20	296	398381	398676	GAGTGGACCATGCAGGTTTT	59.973	20	AGTAGGCACGGATGTTCGAT	59.579	20	249	398278	398526	CCTCTTCATTGGCTCTCAGG	59.943	20	AGTAGGCACGGATGTTCGAT	59.579	20	189	398338	398526
PT-398549-398549	ACTTGAAATCCGCCACTGAC	60.119	20	CACCCAGAATGGCATAATCC	60.155	20	296	398381	398676	GACCATTGTTGGTTTTCGGT	59.694	20	CAGAAATGACTCCCATGGCT	60.073	20	274	398481	398754	ACCATTGTTGGTTTTCGGTC	59.694	20	CAGAAATGACTCCCATGGCT	60.073	20	273	398482	398754
PT-400231-400239	GAACCTTCGGACAAGGAACA	60.088	20	GCGCTCCTTCCTCATCTGTA	60.504	20	231	400069	400299	ATTCGCGCACCTACCATTAG	60.117	20	GCGCTCCTTCCTCATCTGTA	60.504	20	300	400000	400299	AATGACAGGTCTTGGCCCTA	59.55	20	CAATAGGTCTCTCCAGGGCA	60.21	20	257	400154	400410
PT-400306-400318	ATTTGTTCTTCCCGCCTTTC	60.431	20	CAATAGGTCTCTCCAGGGCA	60.21	20	190	400221	400410	AATGACAGGTCTTGGCCCTA	59.55	20	CAATAGGTCTCTCCAGGGCA	60.21	20	257	400154	400410	CTTGGCCCTACCATCATCTC	59.508	20	CAATAGGTCTCTCCAGGGCA	60.21	20	247	400164	400410
PT-401332-401338	CACGCAGACTACTGACGGAA	60.049	20	GCTCACTCACCCCTCTCTTG	59.986	20	198	401224	401421	CACGCAGACTACTGACGGAA	60.049	20	TTGCTCACTCACCCCTCTCT	59.986	20	200	401224	401423	CACGCAGACTACTGACGGAA	60.049	20	CTTGCTCACTCACCCCTCTC	59.986	20	201	401224	401424
PT-401730-401735	GCTTGAAGCCAACCAAGAAG	59.993	20	CTTGCTCTTGGAGTTGGGAG	59.982	20	208	401675	401882	AGCTTGAAGCCAACCAAGAA	59.993	20	CTTGCTCTTGGAGTTGGGAG	59.982	20	209	401674	401882	CTTGAAGCCAACCAAGAAGG	59.846	20	CTTGCTCTTGGAGTTGGGAG	59.982	20	207	401676	401882
PT-402295-402295	GCTAGCCAACGAAGACCATC	59.843	20	GGGTGGTGGTCAACTGTCTT	59.859	20	254	402134	402387	GCTTCAAGCAGCTAGCCAAC	60.3	20	CCTTTGCCTTCGCTTTGTAG	60.011	20	220	402124	402343	GCTAGCCAACGAAGACCATC	59.843	20	CCTCTGTGTCCTTTGCCTTC	59.844	20	219	402134	402352
PT-403675-403678	CTTCCTACGTGCCTTTGAGC	60.015	20	CAAAGCCTTAAGGGAGGACC	60.068	20	232	403618	403849	CCCCACAGACGGTCATAACT	59.844	20	GGTAAGGAAGTGAATGCGGA	60.074	20	255	403498	403752	TAAAGGAGGGACAGAAGGCA	59.807	20	GGTAAGGAAGTGAATGCGGA	60.074	20	298	403455	403752
PT-405003-405003	TCCGCTCTTCTCTTGCTTTC	59.836	20	GTTCTTCGTTCCGTCCTTGA	60.232	20	287	404966	405252	TCCGCTCTTCTCTTGCTTTC	59.836	20	TTCTTCGTTCCGTCCTTGAC	60.232	20	286	404966	405251	CTATCGGAAAGCTAGCACCG	59.996	20	ACAGCGCAGTTCACGTTACA	60.517	20	297	404819	405115
PT-405151-405151	CGCTGTGCTCATCAAAGTGT	60.056	20	TGGCTCGGAATTCTAGTGCT	59.978	20	241	405110	405350	TTCTCCGGGGAAAATTTCTT	59.882	20	GTTCTTCGTTCCGTCCTTGA	60.232	20	260	404993	405252	TTCTCCGGGGAAAATTTCTT	59.882	20	TTCTTCGTTCCGTCCTTGAC	60.232	20	259	404993	405251
PT-405649-405654	TGAGGATTCCGACCTTGAAC	60.05	20	TCCCCTTTGAGAGGGATTCT	60.008	20	217	405568	405784	TGAGGATTCCGACCTTGAAC	60.05	20	CCCCTTTGAGAGGGATTCTC	60.008	20	216	405568	405783	TGAGGATTCCGACCTTGAAC	60.05	20	ATTCTCGTGCCAACCATAGG	59.955	20	202	405568	405769
PT-407625-407625	CTTCCTGAAGATCGCTTTCG	60.088	20	AGCCAGAAGGACAGTGGAGA	59.986	20	271	407489	407759	CTTTCGCTTCCTGAAGATCG	60.088	20	AGCCAGAAGGACAGTGGAGA	59.986	20	277	407483	407759	CGCTACTGCCTTATTCGGAC	59.867	20	AGCCAGAAGGACAGTGGAGA	59.986	20	212	407548	407759
PT-408659-408665	TCCTCCCTGCTAGCTCGATA	60.074	20	GGGGGCTAGGAAACAACTTC	59.94	20	204	408623	408826	TCCGTTTCCTTGTCCTATGG	59.926	20	GGGGGCTAGGAAACAACTTC	59.94	20	250	408577	408826	TCCGTTTCCTTGTCCTATGG	59.926	20	TAAGACAATCGGGCTTACCG	60.089	20	296	408577	408872
PT-408946-408951	CCGTCTTATGACTGGGCATT	59.955	20	CCGCCCAACTCTTACACAAT	59.993	20	269	408758	409026	GAAGTTGTTTCCTAGCCCCC	59.94	20	CCGCCCAACTCTTACACAAT	59.993	20	220	408807	409026	CCGTCTTATGACTGGGCATT	59.955	20	AGCAACATCAACTCATCCCC	59.934	20	288	408758	409045
PT-410519-410519	TACGTTACCACCAGTTGCCA	60.027	20	TTTCAGTGATCCCGTCACAA	60.088	20	277	410288	410564	TACGTTACCACCAGTTGCCA	60.027	20	AATGCAACACGCTTTCAGTG	59.911	20	289	410288	410576	TACGTTACCACCAGTTGCCA	60.027	20	TACGAATGCAACACGCTTTC	59.879	20	293	410288	410580
PT-410708-410714	TTGTGACGGGATCACTGAAA	60.088	20	GCTTATCGGAGGGCTAGGAC	60.194	20	221	410545	410765	CACTGAAAGCGTGTTGCATT	59.911	20	GCTTATCGGAGGGCTAGGAC	60.194	20	209	410557	410765	GGGATCACTGAAAGCGTGTT	60.119	20	GCTTATCGGAGGGCTAGGAC	60.194	20	214	410552	410765
PT-412756-412761	GGCACTACGTCCTAACCCAA	59.993	20	TTGCCCTTTCATCGTCTTTC	60.192	20	238	412674	412911	GGCACTACGTCCTAACCCAA	59.993	20	CCCTTTCATCGTCTTTCGAG	59.807	20	235	412674	412908	GGCACTACGTCCTAACCCAA	59.993	20	CCGGTAAGTTCGAAGAACGA	60.241	20	167	412674	412840
PT-413480-413480	AGCGAATAGGACTGCAAGGA	59.978	20	AACGGTTAGTTGCGTTACGG	60.054	20	206	413407	413612	GAGCGAATAGGACTGCAAGG	59.978	20	AACGGTTAGTTGCGTTACGG	60.054	20	207	413406	413612	AAACCACTCTGCCCTTTCCT	60.11	20	AACGGTTAGTTGCGTTACGG	60.054	20	172	413441	413612
PT-418440-418445	TCAGGAGCAGAAGCAGGATT	60.096	20	TTGGAAGGCCACACCTAGTC	60.111	20	206	418407	418612	AGGAGCAGAAGCAGGATTCA	60.096	20	TTGGAAGGCCACACCTAGTC	60.111	20	204	418409	418612	AGCAGAAGCAGGATTCAGGA	60.096	20	TTGGAAGGCCACACCTAGTC	60.111	20	201	418412	418612
PT-420401-420406	TGGATGCTCGTTGAGAGTTG	59.984	20	TGGTCTTTTCTTTCGGGATG	60.044	20	237	420250	420486	GCCCTAATTGGGGTTACGTT	60.075	20	TGGTCTTTTCTTTCGGGATG	60.044	20	215	420272	420486	TGGATGCTCGTTGAGAGTTG	59.984	20	CTTTCGGGATGAAAACAAGC	59.685	20	228	420250	420477
PT-420473-420480	GAGGTGTTCTTAGCCCCTCC	60.074	20	GGGTAGTTCAGGTGCGCTTA	60.27	20	288	420434	420721	CGATCGAGGTGTTCTTAGCC	59.836	20	GGGTAGTTCAGGTGCGCTTA	60.27	20	293	420429	420721	CCGATCGAGGTGTTCTTAGC	59.836	20	GGGTAGTTCAGGTGCGCTTA	60.27	20	294	420428	420721
PT-421323-421329	CCATTTTGGGCTTTGCTCTA	60.202	20	CCCACCCCCTATTTGAGTTT	60.046	20	159	421226	421384	CTGCTACAATTGCTTCAGCG	59.776	20	CCCACCCCCTATTTGAGTTT	60.046	20	270	421115	421384	TGGCCTTTTTGATCTCATCC	60.014	20	ATAAGAAGGGCATTTTCGGG	60.272	20	229	421277	421505
PT-422847-422852	AGAAAGAGACCCGTTCCCAC	60.489	20	TCGCTCCGTTTCTACCTTGT	59.875	20	281	422733	423013	AGAAAGAGACCCGTTCCCAC	60.489	20	AGGTTTTCTTCGCTCCGTTT	60.242	20	290	422733	423022	AGAAAGAGACCCGTTCCCAC	60.489	20	TTCGCTCCGTTTCTACCTTG	60.378	20	282	422733	423014
PT-422904-422904	CGTGGACCGATAAGAAGAGG	59.688	20	TCGCTCCGTTTCTACCTTGT	59.875	20	168	422846	423013	CGTGGACCGATAAGAAGAGG	59.688	20	AGGTTTTCTTCGCTCCGTTT	60.242	20	177	422846	423022	TCTTATCATGTCGTGGACCG	59.522	20	TCGCTCCGTTTCTACCTTGT	59.875	20	179	422835	423013
PT-423100-423106	ACAGAACGAGGCACCGATAC	60.142	20	GAGCTGCACTGGACCTAACC	59.874	20	265	423046	423310	ACAGAACGAGGCACCGATAC	60.142	20	GGAGCTGCACTGGACCTAAC	59.874	20	266	423046	423311	AGTTACAGAACGAGGCACCG	60.312	20	GAGCTGCACTGGACCTAACC	59.874	20	269	423042	423310
PT-423226-423232	ACAGAACGAGGCACCGATAC	60.142	20	GAGCTGCACTGGACCTAACC	59.874	20	265	423046	423310	ACAGAACGAGGCACCGATAC	60.142	20	GGAGCTGCACTGGACCTAAC	59.874	20	266	423046	423311	GGGTCTAGTAGGGGGTCGAA	60.319	20	GCATCAGAAATAAGAGCGGC	59.951	20	285	423130	423414
PT-424298-424298	AGAAGGAATGCCCGAAAGAT	60.039	20	GGAAGCTCTCTGATTGCAGC	60.249	20	249	424216	424464	AGAAGGAATGCCCGAAAGAT	60.039	20	TTGCGTGGTCATGGTGTATC	60.399	20	222	424216	424437	AGAAGGAATGCCCGAAAGAT	60.039	20	GATTGCGTGGTCATGGTGTA	60.399	20	224	424216	424439
PT-430482-430482	TTTTCGGTGGTAATCAAGCC	59.938	20	GTCTCTCTCTCCCCTTCCGT	59.807	20	226	430310	430535	CGGGTTCCGTCTACATCATT	59.813	20	GGGCTTTCCCTTACTTTTCG	60.068	20	293	430335	430627	TTTTCGGTGGTAATCAAGCC	59.938	20	GGTGGGTAACCCCCTACATT	59.805	20	255	430310	430564
PT-431536-431542	TTCTGTCAACAGCATCTGCC	59.992	20	CGACGAGACAGGAAAGAAGG	59.982	20	244	431330	431573	ATCGGGACTCATAGTCGGTG	59.95	20	CACTCATGGCAGCAAGAAAA	59.988	20	274	431503	431776	TTTCCAGAACGGAGTATCGG	60.066	20	CACTCATGGCAGCAAGAAAA	59.988	20	289	431488	431776
PT-431796-431802	TTTTCTTGCTGCCATGAGTG	59.988	20	ACCGATGAGGAGCTCTGTGT	59.866	20	262	431757	432018	TTTTCTTGCTGCCATGAGTG	59.988	20	AGGAACAGGATGAGGCAGAA	59.803	20	150	431757	431906	TTTTCTTGCTGCCATGAGTG	59.988	20	AGCAGCTCAGGTCTTTCGTC	59.751	20	295	431757	432051
PT-432818-432818	AGCCTGAATTTGAGCAAGGA	59.955	20	TCTATGGAAAAGGGTGTGCC	59.933	20	205	432668	432872	GAGCCTGAATTTGAGCAAGG	59.955	20	TCTATGGAAAAGGGTGTGCC	59.933	20	206	432667	432872	AGCCTGAATTTGAGCAAGGA	59.955	20	TCGGTCTATGGAAAAGGGTG	59.926	20	209	432668	432876
PT-437867-437872	GGCTCATCAAGGAAGACTCG	59.95	20	AGCTCGGACTCCAACAAGAG	59.598	20	235	437723	437957	GCTCATCAAGGAAGACTCGC	60.104	20	AGCTCGGACTCCAACAAGAG	59.598	20	234	437724	437957	GGCTCATCAAGGAAGACTCG	59.95	20	GAGCTCGGACTCCAACAAGA	60.533	20	236	437723	437958
PT-438362-438367	ATACTTGAACAGGCCATCCG	59.955	20	GCTTTAATCGGTCGCAACTC	59.851	20	265	438251	438515	GCCATCCGCTTACATTGATT	59.929	20	GCTTTAATCGGTCGCAACTC	59.851	20	253	438263	438515	ATACTTGAACAGGCCATCCG	59.955	20	CTCTTGCTTGTTGACTTGCG	59.781	20	221	438251	438471
PT-440136-440142	GGCGGGAACTGCTATAAACA	60.096	20	GCCTCGGAATAAACTAGCCC	60.061	20	165	440048	440212	GGCGGGAACTGCTATAAACA	60.096	20	GGCCTCGGAATAAACTAGCC	60.061	20	166	440048	440213	GGCGGGAACTGCTATAAACA	60.096	20	GGGCCTCGGAATAAACTAGC	60.061	20	167	440048	440214
PT-440349-440354	GGGCTAGTTTATTCCGAGGC	60.061	20	CCAACCAACCAGCTAACCAT	59.853	20	242	440193	440434	GCTAGTTTATTCCGAGGCCC	60.061	20	CCAACCAACCAGCTAACCAT	59.853	20	240	440195	440434	GCCCTCCCACTCTAGGACTT	59.699	20	CCAACCAACCAGCTAACCAT	59.853	20	224	440211	440434
PT-440457-440457	ATGGTTAGCTGGTTGGTTGG	59.853	20	TGTCCTTCATGGGGGAATAA	60.126	20	271	440415	440685	ATGGTTAGCTGGTTGGTTGG	59.853	20	CTGTCCTTCATGGGGGAATA	59.744	20	272	440415	440686	ATGGTTAGCTGGTTGGTTGG	59.853	20	TCCTTAGCGAGCCTTTCTTG	59.724	20	292	440415	440706
PT-446066-446072	ACTCAGTCCACAGATTCGGC	60.269	20	GAGAGTATTCAGGGAGGGGC	60.037	20	231	445938	446168	ACTCAGTCCACAGATTCGGC	60.269	20	TTCACGCAGGTCAGGTAGTG	59.897	20	193	445938	446130	ACTCAGTCCACAGATTCGGC	60.269	20	GCAGGTCAGGTAGTGCCATT	60.142	20	188	445938	446125
PT-446851-446856	GATGATGGTCTTCCCCCTTT	60.133	20	AACTCCCTACCTGCAAGCAA	59.875	20	298	446821	447118	CTGAACCTAAGCCGGAGTTG	59.869	20	GCTCCCTCCCTTTATCTGCT	59.811	20	279	446790	447068	CTGAACCTAAGCCGGAGTTG	59.869	20	AGCTCCCTCCCTTTATCTGC	59.811	20	280	446790	447069
PT-448768-448768	TGACATCAACTGCCTCTTCG	59.984	20	CGAAAGAAAGATGGAACCAGA	59.298	21	220	448657	448876	GCAGCATAAGACCATGCAAA	59.839	20	ACCCTTTTCTTCCTCATTCG	58.24	20	260	448535	448794	GCAGCATAAGACCATGCAAA	59.839	20	CACCCTTTTCTTCCTCATTCG	60.962	21	261	448535	448795
PT-450302-450302	TCCCATCTCCAACTGAGACC	60.048	20	GAGGAGGGGGATTCTAGCAC	60.037	20	233	450231	450463	GCTGGCAAATTCAACCATTT	59.945	20	GAGGAGGGGGATTCTAGCAC	60.037	20	292	450172	450463	GTGCAATCCCATCTCCAACT	59.934	20	GAGGAGGGGGATTCTAGCAC	60.037	20	239	450225	450463
PT-450488-450488	GTGCTAGAATCCCCCTCCTC	60.037	20	CAGCGTGCTGTAGATTCTGG	59.615	20	249	450444	450692	GTGCTAGAATCCCCCTCCTC	60.037	20	CCTGTGTCAGCGTGCTGTAG	60.674	20	256	450444	450699	GTGCTAGAATCCCCCTCCTC	60.037	20	TCACAATTATCCGCTACCCA	58.991	20	187	450444	450630
PT-450558-450582	GTGCTAGAATCCCCCTCCTC	60.037	20	CAGCGTGCTGTAGATTCTGG	59.615	20	249	450444	450692	TTAAGACGGCTACGGCTTGT	59.904	20	CAGCGTGCTGTAGATTCTGG	59.615	20	217	450476	450692	GTTAAGACGGCTACGGCTTG	59.904	20	CAGCGTGCTGTAGATTCTGG	59.615	20	218	450475	450692
PT-450645-450645	GTGCTAGAATCCCCCTCCTC	60.037	20	CAGCGTGCTGTAGATTCTGG	59.615	20	249	450444	450692	TTAAGACGGCTACGGCTTGT	59.904	20	CAGCGTGCTGTAGATTCTGG	59.615	20	217	450476	450692	GTTAAGACGGCTACGGCTTG	59.904	20	CAGCGTGCTGTAGATTCTGG	59.615	20	218	450475	450692
PT-450685-450685	GTGCTAGAATCCCCCTCCTC	60.037	20	CCCTGAAATTAATGCCCTGT	58.903	20	271	450444	450714	GTGCTAGAATCCCCCTCCTC	60.037	20	ACCCTGAAATTAATGCCCTG	58.903	20	272	450444	450715	TTAAGACGGCTACGGCTTGT	59.904	20	CCCTGAAATTAATGCCCTGT	58.903	20	239	450476	450714
PT-450719-450735	CTACAGCACGCTGACACAGG	60.674	20	TTTAGAACAAGGTGGGGCTG	60.103	20	232	450680	450911	CTACAGCACGCTGACACAGG	60.674	20	GCGCATCCGTTTTCTTTTAG	59.853	20	268	450680	450947	CTACAGCACGCTGACACAGG	60.674	20	CGCATCCGTTTTCTTTTAGC	59.853	20	267	450680	450946
PT-450959-450959	CAGCCCCACCTTGTTCTAAA	60.103	20	TTCAACCAGGGAACACATGA	59.935	20	203	450892	451094	CGCTAAAAGAAAACGGATGC	59.853	20	TTCAACCAGGGAACACATGA	59.935	20	169	450926	451094	CAGCCCCACCTTGTTCTAAA	60.103	20	ATCGGGGAGGTAGTTTTCGT	59.827	20	182	450892	451073
PT-451087-451087	ACGAAAACTACCTCCCCGAT	59.827	20	AAATAACAGCCCAGCTCCCT	60.096	20	213	451054	451266	CCCGTTGCTTGTTGCTATCT	60.27	20	AAATAACAGCCCAGCTCCCT	60.096	20	300	450967	451266	ACGAAAACTACCTCCCCGAT	59.827	20	TGGTAGAGGAAAAGGCAGGA	59.807	20	267	451054	451320
PT-451138-451138	TCATGTGTTCCCTGGTTGAA	59.935	20	AAATAACAGCCCAGCTCCCT	60.096	20	192	451075	451266	TCATGTGTTCCCTGGTTGAA	59.935	20	TGGTAGAGGAAAAGGCAGGA	59.807	20	246	451075	451320	ACGAAAACTACCTCCCCGAT	59.827	20	AAATAACAGCCCAGCTCCCT	60.096	20	213	451054	451266
PT-451254-451254	TCATGTGTTCCCTGGTTGAA	59.935	20	TGGTAGAGGAAAAGGCAGGA	59.807	20	246	451075	451320	CCTGAGAACCCGAACGATAG	59.688	20	TGTTGCGTCTTCATCTTTGC	59.995	20	290	451186	451475	CCTGAGAACCCGAACGATAG	59.688	20	GACGAGTTGTTGCGTCTTCA	60.032	20	297	451186	451482
PT-451842-451842	TCGGGTGGGATGGTATTTTA	60.009	20	ATGCGTTGGAGAGTTTGCTT	59.882	20	261	451801	452061	GGAAGGTTTAGGGTGGGAAA	60.159	20	AGCCTAGCCTTCGTCAATCA	59.978	20	273	451600	451872	AGTCCAACTTTGGGAAGGGT	59.834	20	AGCCTAGCCTTCGTCAATCA	59.978	20	251	451622	451872
PT-451999-451999	CTCTTGGTATTGACCCGGAA	59.926	20	AATGCCCATGCAACTACCTC	59.962	20	271	451900	452170	TCGGGTGGGATGGTATTTTA	60.009	20	ATGCGTTGGAGAGTTTGCTT	59.882	20	261	451801	452061	CTCTTGGTATTGACCCGGAA	59.926	20	ATGCGTTGGAGAGTTTGCTT	59.882	20	162	451900	452061
PT-452237-452237	GAGGTAGTTGCATGGGCATT	59.962	20	CGCACTCTTACAACCAAGCA	60.05	20	244	452151	452394	GAGGTAGTTGCATGGGCATT	59.962	20	TGCGCACTCTTACAACCAAG	60.05	20	246	452151	452396	GAGGTAGTTGCATGGGCATT	59.962	20	CTGCGCACTCTTACAACCAA	60.05	20	247	452151	452397
PT-452976-452976	GTTGGTAAAGCCAAAGCCAA	60.11	20	CGAAAAACCAAACCACGACT	60.008	20	202	452945	453146	GTTGGTAAAGCCAAAGCCAA	60.11	20	TGGGGTTCTTTGTTAGCACC	59.971	20	265	452945	453209	TACTCCCCGAAAATGCTCTG	60.206	20	CGAAAAACCAAACCACGACT	60.008	20	274	452873	453146
PT-453101-453101	GTTGGTAAAGCCAAAGCCAA	60.11	20	CGAAAAACCAAACCACGACT	60.008	20	202	452945	453146	GTTGGTAAAGCCAAAGCCAA	60.11	20	TGGGGTTCTTTGTTAGCACC	59.971	20	265	452945	453209	TACTCCCCGAAAATGCTCTG	60.206	20	CGAAAAACCAAACCACGACT	60.008	20	274	452873	453146
PT-453424-453437	AAGAAGGAGAGACTTCCCGC	59.957	20	GATTCCCAGGGGATTTTGTT	59.996	20	257	453280	453536	TGGAAATAGATCGCCTGTCC	60.036	20	CCCGTCCGATAAGGTAAGGT	60.2	20	285	453398	453682	TGGAAATAGATCGCCTGTCC	60.036	20	ACCCCGTCCGATAAGGTAAG	60.2	20	287	453398	453684
PT-453870-453870	ATTGGTAAACCCGACACCAA	60.088	20	GAAATCGAAGTTCCGCGTTA	60.209	20	228	453781	454008	TTGGTAAACCCGACACCAAT	60.088	20	GAAATCGAAGTTCCGCGTTA	60.209	20	227	453782	454008	TTGGTAAACCCGACACCAAT	60.088	20	GCTGGGCTGGATTGACTAAA	60.214	20	257	453782	454038
PT-453953-453953	ATTGGTAAACCCGACACCAA	60.088	20	GAAATCGAAGTTCCGCGTTA	60.209	20	228	453781	454008	TTGGTAAACCCGACACCAAT	60.088	20	GAAATCGAAGTTCCGCGTTA	60.209	20	227	453782	454008	TTGGTAAACCCGACACCAAT	60.088	20	GCTGGGCTGGATTGACTAAA	60.214	20	257	453782	454038
PT-454350-454350	CAAGCTGACAACCTTGTGGA	59.873	20	CAAGCAATCAATCAAAGCGA	59.953	20	217	454174	454390	CAAGCTGACAACCTTGTGGA	59.873	20	TCGCAAGCAATCAATCAAAG	59.953	20	220	454174	454393	CAAGCTGACAACCTTGTGGA	59.873	20	ACTTCACCGCTAACGAGCAT	59.904	20	250	454174	454423
PT-456416-456420	ACGACTCCTCTCGATGTGCT	60.017	20	CAAGCCGGACTGCTTATCTC	59.978	20	298	456229	456526	ACGACTCCTCTCGATGTGCT	60.017	20	TCAAGCCGGACTGCTTATCT	59.978	20	299	456229	456527	CCAACCTTCCTGGTGAAAAA	59.942	20	TCAAGCCGGACTGCTTATCT	59.978	20	246	456282	456527
PT-460439-460444	TTCTTCTAACCGGGGGAGTT	59.934	20	CCACTCTAAGCCTCGACCAG	60.005	20	224	460269	460492	TTTCTTCTAACCGGGGGAGT	59.934	20	CCACTCTAAGCCTCGACCAG	60.005	20	225	460268	460492	GAGGTTTCTTCTAACCGGGG	59.934	20	CCACTCTAAGCCTCGACCAG	60.005	20	229	460264	460492
PT-464544-464548	CCACGTGTTCAACCATTCAC	59.855	20	CAATTCTTACGCTGCGTTCA	60.014	20	219	464437	464655	CACGTGTTCAACCATTCACC	59.855	20	CAATTCTTACGCTGCGTTCA	60.014	20	218	464438	464655	ACCACGTGTTCAACCATTCA	59.855	20	CAATTCTTACGCTGCGTTCA	60.014	20	220	464436	464655
PT-465556-465561	GGATTTCAAGTCCTAGCCCC	59.903	20	AAGCTGCTTGCTCTTTGCTC	60.044	20	225	465499	465723	GGATTTCAAGTCCTAGCCCC	59.903	20	TCTCCTTCCTTCCCAAACCT	60.045	20	259	465499	465757	CCAAGCTGGTGACTTCCTTC	59.844	20	AAGCTGCTTGCTCTTTGCTC	60.044	20	202	465522	465723
PT-465741-465741	CATGAGCAAAGAGCAAGCAG	59.888	20	AGGAAGCCCTGGTTCAAAGT	60.11	20	257	465701	465957	TTGCATGAGCAAAGAGCAAG	60.28	20	TGGACTGCTAACGGCTTCTT	60.015	20	290	465698	465987	CTTGCATGAGCAAAGAGCAA	60.28	20	TGGACTGCTAACGGCTTCTT	60.015	20	291	465697	465987
PT-466206-466211	AAAATCTCAGTCCACGGTGC	60.119	20	ATCGGATACAAGAACGTCGC	60.103	20	192	466155	466346	AAAATCTCAGTCCACGGTGC	60.119	20	CGCAGTTAACGGAAGAGTCC	59.875	20	172	466155	466326	AAAATCTCAGTCCACGGTGC	60.119	20	CCGCAGTTAACGGAAGAGTC	59.875	20	173	466155	466327
PT-466770-466770	CGCTATGGGGCTACGTGTAT	60.003	20	GCCCCTGCAATCAAACTAAA	60.074	20	273	466642	466914	GTGACTAGCTCCGCTATGGG	59.859	20	GCCCCTGCAATCAAACTAAA	60.074	20	284	466631	466914	CCTAAATGCAGCCGTGATCT	60.235	20	CCCTAAAGTAGGTAGCCCCG	59.974	20	274	466736	467009
PT-467129-467134	CGGGGCTACCTACTTTAGGG	59.974	20	CCCTATGAGCCGTTTTACGA	60.089	20	186	466990	467175	CGGGGCTACCTACTTTAGGG	59.974	20	TCCCTATGAGCCGTTTTACG	60.089	20	187	466990	467176	GGCGTTAGCGCTTTAGTTTG	60.041	20	CCCTATGAGCCGTTTTACGA	60.089	20	292	466884	467175
PT-467647-467652	ATAGGCGTAGGGAAGAGGGA	60.053	20	CTCCTTTCTTCAGCTGGTGC	60.134	20	240	467523	467762	AATAGGCGTAGGGAAGAGGG	59.571	20	CTCCTTTCTTCAGCTGGTGC	60.134	20	241	467522	467762	ATAGGCGTAGGGAAGAGGGA	60.053	20	TGGAACCCTTTCCCCTTTTA	60.635	20	285	467523	467807
PT-468852-468852	TTCTTCGCTGAGCACAACAG	60.324	20	ATGTCGTGAGGGATGTGACC	60.818	20	296	468659	468954	GAAGGAACGAGAAAAACCGA	59.288	20	CCGAAGAGGAAGGTTTGGAT	60.434	20	260	468726	468985	ATTCGACCTATTGCTCCGC	60.192	19	AGCGACTACGCCGATCTTTA	60.003	20	232	468801	469032
PT-472009-472015	TTGCCAATTCTAATCCAGGG	59.894	20	GCTTTATAGGGAGTTGGGGG	59.793	20	294	471787	472080	TTGCCAATTCTAATCCAGGG	59.894	20	GGCTTTATAGGGAGTTGGGG	59.793	20	295	471787	472081	TTTGAACGCATATTTTCGCA	60.211	20	GCTTTATAGGGAGTTGGGGG	59.793	20	251	471830	472080
PT-472555-472561	CCTCATCCAATCCCAGAGAA	60.003	20	GTAGCAGCTATCTCCGACCG	60	20	150	472435	472584	CCTCATCCAATCCCAGAGAA	60.003	20	ACCTCTTCTGGAGCTAGGGC	59.979	20	206	472435	472640	CCTCATCCAATCCCAGAGAA	60.003	20	CCGCGTAGGTAAGTAGCAGC	60.06	20	162	472435	472596
PT-472835-472841	CCGGGCTTTAATCATTCCTT	60.272	20	GCTACTACGGAAGCGGACTG	60.037	20	279	472774	473052	CCGGGCTTTAATCATTCCTT	60.272	20	CTACTACGGAAGCGGACTGG	59.891	20	278	472774	473051	CCGGGCTTTAATCATTCCTT	60.272	20	GGACTGGGACTGTGCGTACT	60.182	20	265	472774	473038
PT-473157-473168	CCAGTCCGCTTCCGTAGTAG	59.891	20	TTACTAACCGGTGCCACTCC	59.993	20	252	473032	473283	AGTACGCACAGTCCCAGTCC	60.182	20	TTACTAACCGGTGCCACTCC	59.993	20	265	473019	473283	CAGTCCGCTTCCGTAGTAGC	60.037	20	CTTCCAGGACCACTCCTTTG	59.691	20	295	473033	473327
PT-474094-474096	CCCTTTCACAGGAGGTTTGA	60.081	20	TGTTGATCCATTGGCACTGT	59.967	20	254	473912	474165	CCCTTTCACAGGAGGTTTGA	60.081	20	GCGAGATCGTATGTGGGATT	59.923	20	282	473912	474193	CTCGGGGACATTAAAGGGAT	60.145	20	GCGAGATCGTATGTGGGATT	59.923	20	156	474038	474193
PT-475046-475046	GCTTTGGGCTTTCTCTTGTG	59.993	20	CTACATGGCTTCAGCAACGA	60.011	20	196	475001	475196	CTTTGGGCTTTCTCTTGTGG	59.846	20	CTACATGGCTTCAGCAACGA	60.011	20	195	475002	475196	GCTTTGGGCTTTCTCTTGTG	59.993	20	ATGAGCCCAGCTCTGACATT	59.834	20	274	475001	475274
PT-476316-476316	TGCGTGACCTAGAGTGTTCG	60.049	20	CATGGACTGCAGCCCTTAAT	60.096	20	193	476193	476385	TGCGTGACCTAGAGTGTTCG	60.049	20	AGGACCAACGACGATCTCAC	60.12	20	262	476193	476454	TGCGTGACCTAGAGTGTTCG	60.049	20	CCGGGTGCATCGTAAGTAAT	59.845	20	151	476193	476343
PT-476469-476469	GTGAGATCGTCGTTGGTCCT	60.12	20	GGTTCGCCTTTTTCATTCAA	60.053	20	291	476435	476725	GTGAGATCGTCGTTGGTCCT	60.12	20	CGGCTCGGTTTCAAAGTAAG	59.876	20	232	476435	476666	GCAGCTTCATGTTTGTTGGA	59.847	20	CGGCTCGGTTTCAAAGTAAG	59.876	20	279	476388	476666
PT-476847-476855	TTGAATGAAAAAGGCGAACC	60.053	20	TCGGTATACCTTCCCTGTGC	59.955	20	227	476706	476932	TTGAATGAAAAAGGCGAACC	60.053	20	CTGCCGATCTTTCTTTCCTG	59.948	20	257	476706	476962	TTGAATGAAAAAGGCGAACC	60.053	20	CTAGCTGGATCGAGAGACCG	60.111	20	174	476706	476879
PT-480982-481008	AAGAGGCCCTTAAGTCGAGC	59.983	20	CGGTTCAGAGGAAGACAAGC	59.989	20	286	480769	481054	CTAAAAAGGCGAGTTCGTGC	60.018	20	CGGTTCAGAGGAAGACAAGC	59.989	20	259	480796	481054	TAAAAAGGCGAGTTCGTGCT	60.018	20	CGGTTCAGAGGAAGACAAGC	59.989	20	258	480797	481054
PT-481096-481096	GCTTGTCTTCCTCTGAACCG	59.989	20	TCACCTCGCTAGGAAAGAGC	59.717	20	299	481035	481333	GCTTGTCTTCCTCTGAACCG	59.989	20	CCCCATCGGAGGATAGAACT	60.285	20	260	481035	481294	TCAATCAAACCACGAACCAA	59.941	20	TCACCTCGCTAGGAAAGAGC	59.717	20	263	481071	481333
PT-481313-481315	TTGACTTATGCCTCAAGCCC	60.214	20	CCCAAAGGCAAACAAAATGT	59.839	20	216	481234	481449	TCAATCAAACCACGAACCAA	59.941	20	TGCAATCAATCACCTCGCTA	60.366	20	272	481071	481342	AGTTCTATCCTCCGATGGGG	60.285	20	CCCAAAGGCAAACAAAATGT	59.839	20	175	481275	481449
PT-481689-481689	CAAAAGGATTCGAGTTCCCA	60.044	20	AAGGGAGAAAGTCACTCGCA	59.989	20	167	481634	481800	CAAAAGGATTCGAGTTCCCA	60.044	20	CACTCGCATTGCCAAAGTAA	59.872	20	155	481634	481788	CAAAAGGATTCGAGTTCCCA	60.044	20	CGTTCCATCTTCTAGGGCTG	59.83	20	250	481634	481883
PT-481745-481745	CAAAAGGATTCGAGTTCCCA	60.044	20	AAGGGAGAAAGTCACTCGCA	59.989	20	167	481634	481800	GTTGACCCAAAGCTGGTGTT	60.012	20	CAAGGGGTCAAACGAAAGAA	60.081	20	224	481714	481937	CAAAAGGATTCGAGTTCCCA	60.044	20	CACTCGCATTGCCAAAGTAA	59.872	20	155	481634	481788
PT-481825-481825	TGCGAGTGACTTTCTCCCTT	59.989	20	CAAGGGGTCAAACGAAAGAA	60.081	20	157	481781	481937	GTTGACCCAAAGCTGGTGTT	60.012	20	CAAGGGGTCAAACGAAAGAA	60.081	20	224	481714	481937	AAGCTGGTGTTGGAACTGCT	59.914	20	CAAGGGGTCAAACGAAAGAA	60.081	20	215	481723	481937
PT-481981-481981	TTCTTTCGTTTGACCCCTTG	60.081	20	CCGTGTTTTTGGCTTCAAAT	59.975	20	266	481918	482183	TTCTTTCGTTTGACCCCTTG	60.081	20	ATCCACTCCATCTTTGGCAG	60.073	20	233	481918	482150	TTCTTTCGTTTGACCCCTTG	60.081	20	TTGGCAGAGGTAACCAGGTC	60.111	20	220	481918	482137
PT-482200-482200	ATTTGAAGCCAAAAACACGG	59.975	20	GGTCAACCAAGCAAGAGAGC	59.997	20	221	482164	482384	CTGCCAAAGATGGAGTGGAT	60.073	20	GGTCAACCAAGCAAGAGAGC	59.997	20	254	482131	482384	GACCTGGTTACCTCTGCCAA	60.111	20	GGTCAACCAAGCAAGAGAGC	59.997	20	267	482118	482384
PT-482233-482238	ATTTGAAGCCAAAAACACGG	59.975	20	GGTCAACCAAGCAAGAGAGC	59.997	20	221	482164	482384	CTGCCAAAGATGGAGTGGAT	60.073	20	GGTCAACCAAGCAAGAGAGC	59.997	20	254	482131	482384	GACCTGGTTACCTCTGCCAA	60.111	20	GGTCAACCAAGCAAGAGAGC	59.997	20	267	482118	482384
PT-482627-482632	AATCCATTTCAGCAAGGGTG	59.933	20	TGGGGAGAATGAACCAGAAG	60.042	20	230	482515	482744	CAATCCATTTCAGCAAGGGT	59.933	20	TGGGGAGAATGAACCAGAAG	60.042	20	231	482514	482744	AATCCATTTCAGCAAGGGTG	59.933	20	ATAGACTAGCTGCCCCCGTT	60.117	20	179	482515	482693
PT-482950-482950	GCCCAACCAACCTTACAAGA	59.971	20	GGAAAAGCCCTTCAATAGCC	60.041	20	254	482815	483068	GCCCAACCAACCTTACAAGA	59.971	20	CGTGGAGAAGAACTCAAGGG	59.837	20	209	482815	483023	TTACAAGAACCAGCTTGCCC	60.249	20	GGAAAAGCCCTTCAATAGCC	60.041	20	242	482827	483068
PT-483844-483850	CAGGATAGCTGGGCTACGAG	59.993	20	TCCATTTCCATCTCCCACTC	59.862	20	290	483642	483931	AGGTCTTGCCACCGTACTTG	60.171	20	AAGCTCAGGAACGGGATTTT	60.074	20	290	483801	484090	TGGGTCATGGCTAAGAGGTC	60.073	20	CATCTCCCGTTTCACCATTT	59.79	20	177	483786	483962
PT-484652-484652	TTAGCGGCAAACCTTGATCT	59.845	20	TGTGTCAAACGTTGTTTCCG	60.587	20	262	484428	484689	TCTTAGCGGCAAACCTTGAT	59.845	20	TGTGTCAAACGTTGTTTCCG	60.587	20	264	484426	484689	GGCTGCTAGCGGTTATAGGA	59.479	20	GTCAAACCCAGCCCCTTAGT	60.361	20	174	484612	484785
PT-485773-485773	TTTCAAACTACAAGCGCACG	60.052	20	GAAACGGGAATGAAAAGCAA	60.053	20	244	485559	485802	GCCCTTTCAAACTACAAGCG	59.883	20	GAAACGGGAATGAAAAGCAA	60.053	20	248	485555	485802	ATCCCTATTTGTGGAAGCCC	60.152	20	GAAACGGGAATGAAAAGCAA	60.053	20	264	485539	485802
PT-486171-486191	TCTAACTGGTCCATCCTCGG	60.065	20	GGCGAACCAAATCCTGTCTA	60.074	20	190	486026	486215	AACATGCCCTTCCCTAGCTT	60.096	20	GGCGAACCAAATCCTGTCTA	60.074	20	282	485934	486215	TCTAACTGGTCCATCCTCGG	60.065	20	TTAATCACGCGAGCCTACCT	59.867	20	213	486026	486238
PT-486247-486287	AACCCCTCTTGCAACAAATG	59.971	20	AGCCGCTCTAAATGTGGTGT	59.763	20	249	486162	486410	AACCCCTCTTGCAACAAATG	59.971	20	AAGGTGAGTCTTCCCTGCCT	60.252	20	204	486162	486365	AACCCCTCTTGCAACAAATG	59.971	20	AGGTGAGTCTTCCCTGCCTT	60.252	20	203	486162	486364
PT-486374-486396	AGGCAGGGAAGACTCACCTT	60.252	20	GCCCTGATCAATTCGTCTGT	60.081	20	288	486346	486633	AGGCAGGGAAGACTCACCTT	60.252	20	TCATTCGCTTATGATTCCCC	59.862	20	250	486346	486595	AGGCAGGGAAGACTCACCTT	60.252	20	TGATCAATTCGTCTGTCCGA	60.201	20	284	486346	486629
PT-486464-486478	AGGCAGGGAAGACTCACCTT	60.252	20	GCCCTGATCAATTCGTCTGT	60.081	20	288	486346	486633	AGGCAGGGAAGACTCACCTT	60.252	20	TCATTCGCTTATGATTCCCC	59.862	20	250	486346	486595	AGGCAGGGAAGACTCACCTT	60.252	20	TGATCAATTCGTCTGTCCGA	60.201	20	284	486346	486629
PT-486509-486535	AGGCAGGGAAGACTCACCTT	60.252	20	GCCCTGATCAATTCGTCTGT	60.081	20	288	486346	486633	AGGCAGGGAAGACTCACCTT	60.252	20	TCATTCGCTTATGATTCCCC	59.862	20	250	486346	486595	AGGCAGGGAAGACTCACCTT	60.252	20	TGATCAATTCGTCTGTCCGA	60.201	20	284	486346	486629
PT-486679-486679	AGGGCTCAGGGTGAAAGAAT	60.074	20	GGCAAAGCAATCCCAAAGTA	60.074	20	295	486629	486923	ACAGACGAATTGATCAGGGC	60.081	20	GCAATTCTTGCCTTCGGTAG	59.845	20	174	486614	486787	CGAATGAACTCCTCCCTCAG	59.797	20	TCAGAGAGAAAGCCTTGGGA	60.065	20	150	486589	486738
PT-486828-486878	TCCCAAGGCTTTCTCTCTGA	60.065	20	GGCAAAGCAATCCCAAAGTA	60.074	20	205	486719	486923	AGGGCTCAGGGTGAAAGAAT	60.074	20	GGCAAAGCAATCCCAAAGTA	60.074	20	295	486629	486923	GGTCCTATCCCAAGGCTTTC	59.903	20	GGCAAAGCAATCCCAAAGTA	60.074	20	212	486712	486923
PT-486925-486925	CCTACCGAAGGCAAGAATTG	59.702	20	CCGTACTTGGAGCTGTAGCC	59.898	20	286	486767	487052	TCCCAAGGCTTTCTCTCTGA	60.065	20	AGTTGCGGGAACTGTGTTTT	59.639	20	267	486719	486985	AAGAACAGATTTGGCAGGGA	59.67	20	CCGTACTTGGAGCTGTAGCC	59.898	20	236	486817	487052
PT-486962-486962	TACTTTGGGATTGCTTTGCC	60.074	20	AGCTTTGAAGCCGTAGCTTG	59.791	20	300	486904	487203	CCTACCGAAGGCAAGAATTG	59.702	20	CCGTACTTGGAGCTGTAGCC	59.898	20	286	486767	487052	TACTTTGGGATTGCTTTGCC	60.074	20	GGCATTTTCGGCTCATCTAC	59.674	20	168	486904	487071
PT-487079-487090	GGCTACAGCTCCAAGTACGG	59.898	20	ACGAACCCTGAATTTTGTGC	59.978	20	256	487033	487288	TACTTTGGGATTGCTTTGCC	60.074	20	AGCTTTGAAGCCGTAGCTTG	59.791	20	300	486904	487203	GCTTTGCCAAACAATCCTTC	59.691	20	AGCTTTGAAGCCGTAGCTTG	59.791	20	288	486916	487203
PT-487121-487138	GGCTACAGCTCCAAGTACGG	59.898	20	ACGAACCCTGAATTTTGTGC	59.978	20	256	487033	487288	TGCCACTGGTAAGGTAGGCT	59.757	20	ACGAACCCTGAATTTTGTGC	59.978	20	221	487068	487288	TGCCACTGGTAAGGTAGGCT	59.757	20	TGCATATCCCCCTCTTCTTG	60.029	20	296	487068	487363
PT-487224-487306	TGCCACTGGTAAGGTAGGCT	59.757	20	TGCATATCCCCCTCTTCTTG	60.029	20	296	487068	487363	TGCCACTGGTAAGGTAGGCT	59.757	20	ATCCCCCTCTTCTTGCTGTT	60.074	20	291	487068	487358	CGAAAATGCCACTGGTAAGG	60.493	20	ATCCCCCTCTTCTTGCTGTT	60.074	20	297	487062	487358
PT-487351-487352	GCACAAAATTCAGGGTTCGT	59.978	20	CCCGGATATCAAAACCCTTT	60.013	20	228	487269	487496	GCACAAAATTCAGGGTTCGT	59.978	20	GCGTAGTTCCCTCTACGCTG	60.037	20	201	487269	487469	GCACAAAATTCAGGGTTCGT	59.978	20	CGTAGTTCCCTCTACGCTGC	60.037	20	200	487269	487468
PT-487639-487639	TATTCTGCCGCCTATGCTTT	59.838	20	GCGCACTTTAGTATCCGACTC	59.013	21	242	487551	487792	AAGAATCAAAGTCCAGGCGA	59.813	20	GCGCACTTTAGTATCCGACTC	59.013	21	287	487506	487792	TATTCTGCCGCCTATGCTTT	59.838	20	AGCGCACTTTAGTATCCGACTC	59.94	22	243	487551	487793
PT-488085-488085	TACGAAGGAAACTGGTTGGC	60.11	20	GGAAGCAAGCTTTGAGTTGG	59.993	20	222	487991	488212	TACGAAGGAAACTGGTTGGC	60.11	20	GGGAAGCAAGCTTTGAGTTG	59.993	20	223	487991	488213	TACGAAGGAAACTGGTTGGC	60.11	20	ATATTGCTTTTGGCGTTTCG	60.095	20	288	487991	488278
PT-488290-488290	CAACTCAAAGCTTGCTTCCC	59.993	20	GCGTACGTACCAGAATCCGT	60.022	20	166	488194	488359	CCAACTCAAAGCTTGCTTCC	59.993	20	GCGTACGTACCAGAATCCGT	60.022	20	167	488193	488359	TCTGGACTGGCTAGAGCGAT	60.119	20	GCGTACGTACCAGAATCCGT	60.022	20	237	488123	488359
PT-488686-488686	TCAATTACGAAGACGGGGAC	59.933	20	CAATTCCAAGATCCGCTCTC	59.773	20	213	488528	488740	TCAATTACGAAGACGGGGAC	59.933	20	GAGGAACCTCCCGCTAAAGT	59.713	20	267	488528	488794	TTTTGTTGCTAAGCCAAGCC	60.376	20	GACTTCAAGTTCAGCAGCCC	59.997	20	258	488653	488910
PT-488950-488950	GCCTATATCCGATTACGCGA	60.047	20	CAATGGCCGATAGACTTGGT	59.955	20	284	488915	489198	TCCGATTACGCGAAATAACC	59.928	20	CAATGGCCGATAGACTTGGT	59.955	20	277	488922	489198	GCCTATATCCGATTACGCGA	60.047	20	AGTAACGATGGACTCACGGC	60.142	20	210	488915	489124
PT-489584-489617	CGACTGGCTGTTGAACGTAA	59.904	20	TCACTACGACTTGACCTGCG	60.049	20	257	489423	489679	TGGCTGTTGAACGTAACGAG	59.904	20	TCACTACGACTTGACCTGCG	60.049	20	253	489427	489679	CTGGCTGTTGAACGTAACGA	59.904	20	TCACTACGACTTGACCTGCG	60.049	20	254	489426	489679
PT-489688-489717	GAGTTCCCCTTTCGTTCCAT	60.306	20	AGAGGACTACCATCATGCCG	60.096	20	250	489532	489781	AAGGAGTTCCCCTTTCGTTC	59.553	20	AGAGGACTACCATCATGCCG	60.096	20	253	489529	489781	CAAGGAGTTCCCCTTTCGTT	60.467	20	AGAGGACTACCATCATGCCG	60.096	20	254	489528	489781
PT-489804-489804	CGGCATGATGGTAGTCCTCT	60.096	20	AAAGCACATCTGGCCACTTT	59.74	20	211	489762	489972	CGGCATGATGGTAGTCCTCT	60.096	20	AAGCACATCTGGCCACTTTC	60.263	20	210	489762	489971	CGGCATGATGGTAGTCCTCT	60.096	20	CTTTATTTTGCAGCCCCATC	59.547	20	299	489762	490060
PT-489837-489840	CGGCATGATGGTAGTCCTCT	60.096	20	AAAGCACATCTGGCCACTTT	59.74	20	211	489762	489972	CGGCATGATGGTAGTCCTCT	60.096	20	AAGCACATCTGGCCACTTTC	60.263	20	210	489762	489971	CGGCATGATGGTAGTCCTCT	60.096	20	CTTTATTTTGCAGCCCCATC	59.547	20	299	489762	490060
PT-489874-489889	CGGCATGATGGTAGTCCTCT	60.096	20	AAAGCACATCTGGCCACTTT	59.74	20	211	489762	489972	CGGCATGATGGTAGTCCTCT	60.096	20	AAGCACATCTGGCCACTTTC	60.263	20	210	489762	489971	CGGCATGATGGTAGTCCTCT	60.096	20	CTTTATTTTGCAGCCCCATC	59.547	20	299	489762	490060
PT-489932-489932	CGGCATGATGGTAGTCCTCT	60.096	20	AAAGCACATCTGGCCACTTT	59.74	20	211	489762	489972	CGGCATGATGGTAGTCCTCT	60.096	20	AAGCACATCTGGCCACTTTC	60.263	20	210	489762	489971	CGGCATGATGGTAGTCCTCT	60.096	20	CTTTATTTTGCAGCCCCATC	59.547	20	299	489762	490060
PT-490043-490043	AAAGTGGCCAGATGTGCTTT	59.74	20	AAATAGCGCCCCTCTCTGAT	60.194	20	181	489953	490133	AAGTGGCCAGATGTGCTTTT	59.74	20	AAATAGCGCCCCTCTCTGAT	60.194	20	180	489954	490133	GAAAGTGGCCAGATGTGCTT	60.263	20	AAATAGCGCCCCTCTCTGAT	60.194	20	182	489952	490133
PT-490081-490098	TGGGGCTGCAAAATAAAGAG	60.202	20	GAGCCTGCTGGCTATTTGAC	59.985	20	262	490043	490304	TGGGGCTGCAAAATAAAGAG	60.202	20	GCCTGCTGGCTATTTGACTC	59.985	20	260	490043	490302	TGGGGCTGCAAAATAAAGAG	60.202	20	AGAGCCTGCTGGCTATTTGA	60.118	20	263	490043	490305
PT-490175-490175	ATCAGAGAGGGGCGCTATTT	60.194	20	GAGCCTGCTGGCTATTTGAC	59.985	20	191	490114	490304	ATCAGAGAGGGGCGCTATTT	60.194	20	GCCTGCTGGCTATTTGACTC	59.985	20	189	490114	490302	TGGGGCTGCAAAATAAAGAG	60.202	20	GAGCCTGCTGGCTATTTGAC	59.985	20	262	490043	490304
PT-490675-490675	AAGCTAGGAAGGCGAGGAAC	59.983	20	TACCACCTCCCAATTATCCG	59.64	20	293	490504	490796	AGGAAAGCTAGGAAGGCGAG	60.11	20	TACCACCTCCCAATTATCCG	59.64	20	297	490500	490796	AAGCTAGGAAGGCGAGGAAC	59.983	20	GGCTCATCTTGAAGCGCTAA	60.626	20	225	490504	490728
PT-490842-490842	TAGCGCTTCAAGATGAGCCT	60.257	20	CACCCGCTGTACAAGTGAGA	59.897	20	258	490710	490967	CGGATAATTGGGAGGTGGTA	59.64	20	AATGATGGCTGGTGTAAGGC	59.962	20	283	490777	491059	CGGATAATTGGGAGGTGGTA	59.64	20	GCTGGTGTAAGGCCAATCAT	59.962	20	276	490777	491052
PT-490898-491010	CGGATAATTGGGAGGTGGTA	59.64	20	AATGATGGCTGGTGTAAGGC	59.962	20	283	490777	491059	CGGATAATTGGGAGGTGGTA	59.64	20	GCTGGTGTAAGGCCAATCAT	59.962	20	276	490777	491052	TGGGTTGTTTATCGGCCTTA	60.315	20	TATGCCCGTAGGGAGGTATG	59.801	20	292	490873	491164
PT-491045-491045	CTGCGCACCTTATATGGGTT	59.982	20	ATGCCTCAAACAAGGAATGC	60.081	20	294	491000	491293	CTGCGCACCTTATATGGGTT	59.982	20	TATGCCCGTAGGGAGGTATG	59.801	20	165	491000	491164	GCGCACCTTATATGGGTTGT	59.851	20	ATGCCTCAAACAAGGAATGC	60.081	20	292	491002	491293
PT-491091-491091	CTGCGCACCTTATATGGGTT	59.982	20	ATGCCTCAAACAAGGAATGC	60.081	20	294	491000	491293	GCCTTACACCAGCCATCATT	59.962	20	ATGCCTCAAACAAGGAATGC	60.081	20	254	491040	491293	ATGATTGGCCTTACACCAGC	59.962	20	ATGCCTCAAACAAGGAATGC	60.081	20	261	491033	491293
PT-491297-491297	GCATTCCTTGTTTGAGGCAT	60.081	20	GCAGCCTTGCAGATGTATGA	59.979	20	275	491274	491548	GCATTCCTTGTTTGAGGCAT	60.081	20	GATAGTAACGACCGACCGGA	59.955	20	198	491274	491471	GCCTTACACCAGCCATCATT	59.962	20	CATGGGGATTACAACAACCC	59.91	20	294	491040	491333
PT-491644-491644	GTTGGTTCTCTGCTTCCAGC	59.997	20	ATGAAGCCCGTAGACAATGG	59.955	20	212	491599	491810	TCATACATCTGCAAGGCTGC	59.979	20	ATGAAGCCCGTAGACAATGG	59.955	20	282	491529	491810	GTTGGTTCTCTGCTTCCAGC	59.997	20	GCCCGTAGACAATGGCTTTA	60.096	20	207	491599	491805
PT-492199-492199	CACGAAGTCAGGCTTTGTCA	60.025	20	GGCTACAGACCAAGTCCCAA	60.111	20	251	492004	492254	GGCAGTAACGGTGAGGAAAA	60.11	20	TACATCGTCTCCCAAAAGCC	60.074	20	272	492093	492364	GGCAGTAACGGTGAGGAAAA	60.11	20	GGCTACAGACCAAGTCCCAA	60.111	20	162	492093	492254
PT-492268-492270	GGCAGTAACGGTGAGGAAAA	60.11	20	TACATCGTCTCCCAAAAGCC	60.074	20	272	492093	492364	CTTGCCCTCCATCTTACAGC	59.836	20	TACATCGTCTCCCAAAAGCC	60.074	20	187	492178	492364	GCTTGCCCTCCATCTTACAG	59.836	20	TACATCGTCTCCCAAAAGCC	60.074	20	188	492177	492364
PT-492640-492646	CCACTCCTTCGCTTGTCAAT	60.255	20	TTATACCAAAGCTCGGCACC	60.096	20	268	492584	492851	GTCTTTCACCCACTCCTTCG	59.697	20	TTATACCAAAGCTCGGCACC	60.096	20	277	492575	492851	CCACTCCTTCGCTTGTCAAT	60.255	20	CGAAAGCAAAGGCTAAGTCG	60.145	20	220	492584	492803
PT-492744-492744	TCAAAATGCTTCGCTCCTTT	59.96	20	TCCCTCCGCTGAAAGATAGA	59.91	20	234	492674	492907	CAAAATGCTTCGCTCCTTTC	59.96	20	TTATACCAAAGCTCGGCACC	60.096	20	177	492675	492851	TCAAAATGCTTCGCTCCTTT	59.96	20	TTATACCAAAGCTCGGCACC	60.096	20	178	492674	492851
PT-493071-493071	GGTGCCGAGCTTTGGTATAA	60.096	20	TATGGCAGGCACAGAGTCAG	60.008	20	263	492832	493094	GGTGCCGAGCTTTGGTATAA	60.096	20	CCCCTTTCTTAAAGTTCCCG	59.933	20	295	492832	493126	GGTGCCGAGCTTTGGTATAA	60.096	20	TTATGGCAGGCACAGAGTCA	60.413	20	264	492832	493095
PT-493471-493487	CCTGTCGCAGGAGATTCATT	60.218	20	GTGGGGTGACGAAGACAACT	60.009	20	208	493357	493564	TCTTTTCCCGGTTCACTCTG	60.224	20	GTGGGGTGACGAAGACAACT	60.009	20	250	493315	493564	ACCTGTCGCAGGAGATTCAT	59.685	20	GTGGGGTGACGAAGACAACT	60.009	20	209	493356	493564
PT-493793-493793	AGTTGTCTTCGTCACCCCAC	60.009	20	GGGTAACATGGCTGAGCTGT	60.142	20	281	493545	493825	GGACATGGGCATCTCTGTCT	60.08	20	GGGTAACATGGCTGAGCTGT	60.142	20	164	493662	493825	GGACATGGGCATCTCTGTCT	60.08	20	CAGGTCAAGGGTGCTAGGAA	60.246	20	286	493662	493947
PT-493826-493826	GGACATGGGCATCTCTGTCT	60.08	20	CAGGTCAAGGGTGCTAGGAA	60.246	20	286	493662	493947	CTCGTGATCCGACAGATGAA	59.787	20	CAGGTCAAGGGTGCTAGGAA	60.246	20	243	493705	493947	TGTCTTAAAGGTTTTCGGCG	60.236	20	CAGGTCAAGGGTGCTAGGAA	60.246	20	271	493677	493947
PT-494509-494521	AGGAACACGGCAACCTACAC	60.035	20	TGGTTCCTGAAGTTTGGTCC	59.943	20	289	494341	494629	TCGGACCATTTGAAACAACA	59.941	20	TGGTTCCTGAAGTTTGGTCC	59.943	20	199	494431	494629	AACAACAGCCAACGGCTATC	60.14	20	TTAGACTGTGGGTTCCAGGG	59.959	20	258	494444	494701
PT-494593-494593	GCAAGAAGTCACGGGAGAAG	59.989	20	TTAGACTGTGGGTTCCAGGG	59.959	20	183	494519	494701	CAAGAAGTCACGGGAGAAGC	59.989	20	TTAGACTGTGGGTTCCAGGG	59.959	20	182	494520	494701	GCAAGAAGTCACGGGAGAAG	59.989	20	TGACTTCTCTCCCCATCACC	60.048	20	268	494519	494786
PT-495117-495118	GTGGTAGCGGTAGCATGGTT	60.022	20	TCGACATCCAGGTACGAGAA	59.241	20	238	495072	495309	AGCATGGTTAACGGTTGCAT	60.395	20	CCCAAGATTTGATGAGACGG	60.452	20	292	495083	495374	GCCTTCTGTGGTAGCGGTAG	59.898	20	TCGACATCCAGGTACGAGAA	59.241	20	245	495065	495309
PT-495365-495367	TGTCGAGCACGAAAGAAAGA	59.716	20	GAAGGGATCATTGGAAAGCA	60.014	20	267	495304	495570	TGTCGAGCACGAAAGAAAGA	59.716	20	TTAATTGAATCTCCCGCGAC	60.038	20	290	495304	495593	TGTCGAGCACGAAAGAAAGA	59.716	20	TCAAGCTCGGGAGAGGAATA	59.91	20	213	495304	495516
PT-495432-495432	ATCGAAATGTGCTTTACGGG	59.96	20	GAAGGGATCATTGGAAAGCA	60.014	20	171	495400	495570	ATCGAAATGTGCTTTACGGG	59.96	20	GCTTACCGACTTCATCTCGC	59.985	20	214	495400	495613	ATCGAAATGTGCTTTACGGG	59.96	20	TTAATTGAATCTCCCGCGAC	60.038	20	194	495400	495593
PT-495524-495551	ATCGAAATGTGCTTTACGGG	59.96	20	GCTTACCGACTTCATCTCGC	59.985	20	214	495400	495613	ATCGAAATGTGCTTTACGGG	59.96	20	TTAATTGAATCTCCCGCGAC	60.038	20	194	495400	495593	TCAGACGGAATCCTACCCTG	60.065	20	GCTTACCGACTTCATCTCGC	59.985	20	238	495376	495613
PT-495699-495701	GCGAGATGAAGTCGGTAAGC	59.985	20	GGGCTAGTCATAGAAGGGGC	60.06	20	201	495594	495794	TATTCCTCTCCCGAGCTTGA	59.91	20	GGGCTAGTCATAGAAGGGGC	60.06	20	298	495497	495794	TGCTTTCCAATGATCCCTTC	60.014	20	GAAATCCGTTTGGTTCCCTT	60.166	20	278	495551	495828
PT-496920-496920	GACTTCCCTGCGCTAACAAC	59.882	20	ACTCCTTCTGTTGCCGAAGA	59.989	20	160	496882	497041	GACTTCCCTGCGCTAACAAC	59.882	20	CTGTTGCCGAAGAACAATCA	59.84	20	153	496882	497034	GACTTCCCTGCGCTAACAAC	59.882	20	CCGTCTGTCCCGATATTGAT	59.773	20	197	496882	497078
PT-499294-499298	AAAAGCCTCGCAATCAGCTA	60.117	20	AGTCCCGTAACGACAGATGG	59.989	20	268	499124	499391	AAAAGCCTCGCAATCAGCTA	60.117	20	CCAGTCCCGTAACGACAGAT	59.989	20	270	499124	499393	AAAAGCCTCGCAATCAGCTA	60.117	20	CCTGCGAATGAGCTAGAACC	59.978	20	205	499124	499328
PT-500512-500517	CGGAAGCACTCTCCTCATTC	59.95	20	CGCGCGTACTCTTCCTCTAT	59.637	20	230	500359	500588	TCGGAAGCACTCTCCTCATT	59.95	20	CGCGCGTACTCTTCCTCTAT	59.637	20	231	500358	500588	TTCGGAAGCACTCTCCTCAT	59.95	20	CGCGCGTACTCTTCCTCTAT	59.637	20	232	500357	500588
PT-501086-501091	CCAAACAAAAACCCCCTTTT	60.062	20	TTTTTAGCGAAGCGTCAAGC	60.639	20	169	500948	501116	TGCTACTGCTAGCTGCCAAA	59.918	20	TTTTTAGCGAAGCGTCAAGC	60.639	20	184	500933	501116	CCAAACAAAAACCCCCTTTT	60.062	20	AGAACGGATTGAAACGAAGC	59.316	20	264	500948	501211
PT-501323-501329	ATCGGAAGAAGTCATCCACG	60.073	20	ATTGCATTCCTTTTGCTTGG	60.074	20	214	501232	501445	ATCGGAAGAAGTCATCCACG	60.073	20	TTGCTTGGTCCTTTTGTTCC	60.088	20	202	501232	501433	ATCGGAAGAAGTCATCCACG	60.073	20	CGATTGCATTCCTTTTGCTT	60.209	20	216	501232	501447
PT-505137-505142	CACACGAAAGATCGGATGTG	60.112	20	TTCTCTATATGCCGCCTGCT	59.967	20	289	505041	505329	CACACGAAAGATCGGATGTG	60.112	20	TCTCTATATGCCGCCTGCTT	59.967	20	288	505041	505328	CACACGAAAGATCGGATGTG	60.112	20	CTTCTCTATATGCCGCCTGC	59.967	20	290	505041	505330
PT-506000-506001	TAACTCGATCACCGGGCTAC	60.096	20	AAGATTCGACCCATTCTCCC	60.272	20	300	505903	506202	TAACTCGATCACCGGGCTAC	60.096	20	ATTCTCCCGCATTGAAAAGA	59.645	20	288	505903	506190	TAACTCGATCACCGGGCTAC	60.096	20	TCTCCCGCATTGAAAAGAAT	59.645	20	286	505903	506188
PT-507259-507259	CACAGTTCGCTTACCCGATT	60.132	20	CTGTCCGGAGTCTCTATCGC	59.973	20	264	507194	507457	CACAGTTCGCTTACCCGATT	60.132	20	GCTGTCCGGAGTCTCTATCG	59.973	20	265	507194	507458	ACAGTTCGCTTACCCGATTG	60.132	20	CTGTCCGGAGTCTCTATCGC	59.973	20	263	507195	507457
PT-507819-507825	GACCAATCAAGACCGCTTGT	60.119	20	AAAGACTTCTTCCCTTCCCG	59.685	20	273	507592	507864	CCTTTGGGACATGATGGAAC	60.173	20	AAAGACTTCTTCCCTTCCCG	59.685	20	299	507566	507864	TTGGGACATGATGGAACGTA	59.774	20	AAAGACTTCTTCCCTTCCCG	59.685	20	296	507569	507864
PT-508226-508234	ACAGTTTCGACTTCCATCGG	60.111	20	GAAAGAAAGGAACGAAGGGG	60.046	20	248	508059	508306	CAGTTTCGACTTCCATCGGT	60.111	20	GAAAGAAAGGAACGAAGGGG	60.046	20	247	508060	508306	ACAGTTTCGACTTCCATCGG	60.111	20	AAAGAAAGGAACGAAGGGGA	60.046	20	247	508059	508305
PT-510447-510452	CCCTTAGTGCCTGCTGAGAC	60.012	20	ATAAATGATGCCATTCCCGA	60.117	20	284	510314	510597	CGTCTCTAAGCTTCCCCCTT	59.842	20	ATAAATGATGCCATTCCCGA	60.117	20	299	510299	510597	CCCTTAGTGCCTGCTGAGAC	60.012	20	AATAAATGATGCCATTCCCG	59.621	20	285	510314	510598
PT-511492-511494	GGGCAAAAGACAGACTCAGC	59.997	20	CATTCATCGGGTAGCGTCTT	60.096	20	161	511440	511600	ACGTTCCAAGTGACCTGACC	60.009	20	CATTCATCGGGTAGCGTCTT	60.096	20	210	511391	511600	GTGAGCAGCGATTGAACTGA	60.144	20	CATTCATCGGGTAGCGTCTT	60.096	20	230	511371	511600
PT-511994-511999	ACCGCTCAGACATACATCCC	59.957	20	ATAACCGAATGCCAAAATCG	59.795	20	260	511776	512035	CGCTCAGACATACATCCCCT	60.096	20	ATAACCGAATGCCAAAATCG	59.795	20	258	511778	512035	TTCCGAAGTTTTCAAGACCG	60.22	20	ATAACCGAATGCCAAAATCG	59.795	20	289	511747	512035
PT-512900-512909	GCGAGTAAGCGATTGTAGGC	60.01	20	AAGCCTGAGAAGAAGGAGGG	59.95	20	269	512821	513089	GCGAGTAAGCGATTGTAGGC	60.01	20	GGTATGACCAGGAAGCCTGA	60.073	20	281	512821	513101	GCGAGTAAGCGATTGTAGGC	60.01	20	CGTTAAGAAGCCCGGTATGA	60.089	20	294	512821	513114
PT-514776-514781	CACTTCGACGTTTCCCATTT	59.971	20	GAGACATCCGATCCTTTGGA	60.011	20	189	514665	514853	CACTTCGACGTTTCCCATTT	59.971	20	AGGAGAGTCCCTTCGCTAGG	59.972	20	163	514665	514827	CGTTTCCCATTTTCCGTAGA	59.931	20	GAGACATCCGATCCTTTGGA	60.011	20	181	514673	514853
PT-514892-514898	TCCAAAGGATCGGATGTCTC	60.011	20	CCCTAGGGAAGAATTCTCGG	60.025	20	176	514834	515009	TCCAAAGGATCGGATGTCTC	60.011	20	TCGCCCTTTCTTTCTCTCAA	60.066	20	262	514834	515095	TTTTTGTTCCAAAGGATCGG	59.91	20	CCCTAGGGAAGAATTCTCGG	60.025	20	183	514827	515009
PT-514977-514983	TCCAAAGGATCGGATGTCTC	60.011	20	CCCTAGGGAAGAATTCTCGG	60.025	20	176	514834	515009	TCCAAAGGATCGGATGTCTC	60.011	20	TCGCCCTTTCTTTCTCTCAA	60.066	20	262	514834	515095	TTTTTGTTCCAAAGGATCGG	59.91	20	CCCTAGGGAAGAATTCTCGG	60.025	20	183	514827	515009
PT-515045-515051	TCCAAAGGATCGGATGTCTC	60.011	20	TCGCCCTTTCTTTCTCTCAA	60.066	20	262	514834	515095	TTTTTGTTCCAAAGGATCGG	59.91	20	TCGCCCTTTCTTTCTCTCAA	60.066	20	269	514827	515095	TCAATGATCCTAGCGAAGGG	60.17	20	TCGCCCTTTCTTTCTCTCAA	60.066	20	296	514800	515095
PT-515798-515804	CCCTTTACTCGTTCCCACAA	59.964	20	GAGACTCGAAACAACTCGGC	59.997	20	257	515734	515990	CCCTTTACTCGTTCCCACAA	59.964	20	GGCACTCGTATCGGTGAAAT	59.962	20	240	515734	515973	CCCTTTACTCGTTCCCACAA	59.964	20	ACTCGAAACAACTCGGCACT	59.914	20	254	515734	515987
PT-522203-522209	CCAGGGACAGCTTCAAGAAC	59.844	20	TCCAATCGGAAGACTTGCTT	59.813	20	298	522084	522381	CCAGGGACAGCTTCAAGAAC	59.844	20	CAGAGGGAGGAAAAGCAATG	59.807	20	151	522084	522234	CCAGGGACAGCTTCAAGAAC	59.844	20	GGAGAGAACACGAGGGATGA	60.199	20	241	522084	522324
PT-523404-523404	GCCATAGTGCTGACGAACAA	59.871	20	TGGGGTTATTACCTGCTTGC	59.96	20	206	523233	523438	CCAGAACTGGTGGATATGGG	60.187	20	TGGGGTTATTACCTGCTTGC	59.96	20	160	523279	523438	GTTTCCACACCCACCAGAAC	60.261	20	TGGGGTTATTACCTGCTTGC	59.96	20	173	523266	523438
PT-524919-524920	GGCTGCTGCTTGTAGGATTC	59.985	20	TGCCATTGACTCATCTCTGG	59.787	20	296	524860	525155	AAGAACGAGCCAACGCTCTA	60.154	20	GTTCCAAAGGAACAAGCTGC	59.859	20	213	524786	524998	GAACGAGCCAACGCTCTAGT	59.644	20	GTTCCAAAGGAACAAGCTGC	59.859	20	211	524788	524998
PT-525410-525410	TGGCCTGTAGACTTGACGTG	59.897	20	GTTCTTCCTTGATGACCGGA	60.05	20	251	525356	525606	ATTGGATGGTGTTGTCCGTT	60.096	20	TTTCTTGATTTCCGGAATGG	59.872	20	193	525337	525529	TGGCCTGTAGACTTGACGTG	59.897	20	TTTCTTGATTTCCGGAATGG	59.872	20	174	525356	525529
PT-526807-526812	GTTGTGGTAACGCCCTCCTA	59.993	20	ACTCCCCTGTCTGTTTCCCT	59.968	20	289	526565	526853	GTTGTGGTAACGCCCTCCTA	59.993	20	TTACAGCCAACTCCCCTGTC	60.111	20	298	526565	526862	GGATGGGGATCAACCTCTTT	60.133	20	CTCTTTTTGATCAGGAGCGG	59.948	20	296	526742	527037
PT-527475-527475	GCCGCTTTCTTTCATAGCAG	60.117	20	CCACCACTTCTCCGTTCATT	59.966	20	261	527303	527563	CTGCCGCTTTCTTTCATAGC	60.117	20	CCACCACTTCTCCGTTCATT	59.966	20	263	527301	527563	GCCGCTTTCTTTCATAGCAG	60.117	20	GGTCCGAAATTCGAAGTGAA	60.051	20	199	527303	527501
PT-528254-528254	CATTTGACGGAAATGGAAGG	60.301	20	CAGATCCCCCTAAAAACCGT	60.18	20	280	528168	528447	GCACTACTGGCAAAGACCGT	60.321	20	CCTGTCTGTCGTACCGTTGA	59.745	20	258	528047	528304	CATTTGACGGAAATGGAAGG	60.301	20	TTTAGACTGCTCGACCTCGG	60.529	20	180	528168	528347
PT-529849-529854	ACGATACGCTTTGGTTACCG	60.018	20	CACTTCAATTCAAGCGCAAA	59.992	20	179	529756	529934	AAGTACCAAAGTGGTTGCGG	60.03	20	CACTTCAATTCAAGCGCAAA	59.992	20	201	529734	529934	ACGATACGCTTTGGTTACCG	60.018	20	ATATTGGAAAAATGGCAGCG	59.928	20	289	529756	530044
PT-529912-529917	AAACAGCTCGCCCTACTGAA	60.015	20	GTCACCCATAACACGGCTCT	59.997	20	250	529856	530105	TTCAAACAGCTCGCCCTACT	60.015	20	GTCACCCATAACACGGCTCT	59.997	20	253	529853	530105	AAACAGCTCGCCCTACTGAA	60.015	20	ATATTGGAAAAATGGCAGCG	59.928	20	189	529856	530044
PT-531358-531364	TGAAATAGGTGGCTGGGTTC	59.933	20	ACGCAAAAGGAATGTGGTTC	59.978	20	214	531263	531476	CGTCCCCCTATCCCTTATGT	60.032	20	TCCTTTCCTTGTTTGTTGGG	59.942	20	259	531321	531579	TGAAATAGGTGGCTGGGTTC	59.933	20	AATGTGGTTCTGGTTGAGGC	59.973	20	204	531263	531466
PT-533021-533022	CACAGTAAGGTGCGAAGCAA	60.05	20	AAAGTGGCCTGCTTGAAAGA	59.993	20	224	532989	533212	CACAGTAAGGTGCGAAGCAA	60.05	20	GGTTACGGTTATCCCGGACT	60.074	20	255	532989	533243	CACAGTAAGGTGCGAAGCAA	60.05	20	AAAAAGTGGCCTGCTTGAAA	59.861	20	226	532989	533214
PT-535467-535472	GTATTCACGAGGGGTGCTGT	59.997	20	GCAGCTTCTTGAGTTGGGAC	59.997	20	180	535333	535512	ATAGGCGCGCAGACCTAGTA	60.025	20	GCAGCTTCTTGAGTTGGGAC	59.997	20	292	535221	535512	GAAATTGCAAGCAGCATTGA	59.96	20	GCAGCTTCTTGAGTTGGGAC	59.997	20	235	535278	535512
PT-535650-535650	CCAGCTGCAGAATACGAACA	60.011	20	GAGCGTCGAAAGAAAGGTTG	59.993	20	218	535626	535843	CCAGCTGCAGAATACGAACA	60.011	20	CGAAAGAAAGGTTGCGGATA	60.202	20	212	535626	535837	TAGCCAGCTGCAGAATACGA	59.735	20	GAGCGTCGAAAGAAAGGTTG	59.993	20	221	535623	535843
PT-553050-553050	CGAGACTGATCCCGTTCCTA	60.21	20	CGTTGGCCATCTTCTTTACTG	59.755	21	285	552902	553186	CGAGACTGATCCCGTTCCTA	60.21	20	ATTCGTTGGCCATCTTCTTT	58.647	20	288	552902	553189	CGAGACTGATCCCGTTCCTA	60.21	20	TTCGTTGGCCATCTTCTTTA	58.361	20	287	552902	553188
PT-553125-553130	CGAGACTGATCCCGTTCCTA	60.21	20	CGTTGGCCATCTTCTTTACTG	59.755	21	285	552902	553186	CGAGACTGATCCCGTTCCTA	60.21	20	ATTCGTTGGCCATCTTCTTT	58.647	20	288	552902	553189	CGAGACTGATCCCGTTCCTA	60.21	20	TTCGTTGGCCATCTTCTTTA	58.361	20	287	552902	553188
PT-553360-553360	TGGGATAGGGCTGTTTTCTG	60.066	20	TCGCGATAACCTTACCCTTG	60.089	20	290	553329	553618	AGCTGGGATAGGGCTGTTTT	60.096	20	TCGCGATAACCTTACCCTTG	60.089	20	293	553326	553618	GATAATGCTTTCGAGCTGGC	59.951	20	GTCCGGCAACTCTCCTCATA	60.218	20	285	553295	553579
PT-553682-553683	GGAGAGTTGCCGGACTATGA	60.218	20	AATCCCTTATGGAGGGAAGC	59.379	20	178	553565	553742	TATGAGGAGAGTTGCCGGAC	60.218	20	AATCCCTTATGGAGGGAAGC	59.379	20	183	553560	553742	CTATGAGGAGAGTTGCCGGA	60.353	20	AATCCCTTATGGAGGGAAGC	59.379	20	184	553559	553742
PT-554105-554105	GATGTGCTCATTTTCGCAGA	59.955	20	CAAGAGGAGGAGACAGTCGG	59.978	20	243	554037	554279	GATGTGCTCATTTTCGCAGA	59.955	20	CCAAGAGGAGGAGACAGTCG	59.978	20	244	554037	554280	AAATATTCAGCCGGCCTTTT	59.936	20	GCCGAGAATGATAGGGAACA	60.036	20	214	553936	554149
PT-554200-554200	TGTTCCCTATCATTCTCGGC	60.036	20	CAAGAGGAGGAGACAGTCGG	59.978	20	150	554130	554279	TGTTCCCTATCATTCTCGGC	60.036	20	CCAAGAGGAGGAGACAGTCG	59.978	20	151	554130	554280	GATGTGCTCATTTTCGCAGA	59.955	20	CAAGAGGAGGAGACAGTCGG	59.978	20	243	554037	554279
PT-554269-554269	TGTTCCCTATCATTCTCGGC	60.036	20	AATTGCTAATTCGGCGATTG	60.061	20	178	554130	554307	GATGTGCTCATTTTCGCAGA	59.955	20	AATTGCTAATTCGGCGATTG	60.061	20	271	554037	554307	CATTCTCGGCCACCAGTTAT	59.955	20	AATTGCTAATTCGGCGATTG	60.061	20	168	554140	554307
PT-554873-554873	CGGTAATGGAAGATGTGGCT	59.955	20	GCTGAGAGACCAAACGATCC	59.81	20	293	554704	554996	TAATGGAAACAGGTCTCCCG	59.926	20	TCTGCCTAATGAGGGCTGTT	59.836	20	213	554827	555039	CGGTAATGGAAGATGTGGCT	59.955	20	CATTCTGCGGTTAGGAGGAA	60.206	20	209	554704	554912
PT-555025-555031	TAATGGAAACAGGTCTCCCG	59.926	20	AATTTGTTCCAAACGATGCC	59.807	20	256	554827	555082	CCCGGACCATGCTCTAGTAA	60.088	20	AATTTGTTCCAAACGATGCC	59.807	20	240	554843	555082	GATCGTTTGGTCTCTCAGCC	59.81	20	CCCACGATTGACCACTTTTT	59.83	20	278	554978	555255
PT-556023-556023	ATTGGTCTCTCTTCCCCGAT	59.896	20	CAAAACGTCGGCCATAGAAT	59.96	20	252	555830	556081	ATTGGTCTCTCTTCCCCGAT	59.896	20	TGTCCCAGGTCAAACATCAA	59.935	20	294	555830	556123	ATTGGTCTCTCTTCCCCGAT	59.896	20	TTGTCCCAGGTCAAACATCA	59.935	20	295	555830	556124
PT-556597-556602	AGAGTCCGGCCTTTCGTAAT	60.096	20	GGCTTCTAGGGAACCTGCTT	59.848	20	263	556504	556766	AGAGTCCGGCCTTTCGTAAT	60.096	20	CTCCGGTAGGCAATCAAGAG	59.83	20	200	556504	556703	AGAGTCCGGCCTTTCGTAAT	60.096	20	TCTTAGGTCTCCGGTAGGCA	59.83	20	208	556504	556711
PT-557011-557017	GTGGAACTGCCATCCTTGAT	59.934	20	CACTGGGAAGGAGCAAAGAG	59.982	20	158	556916	557073	GTGGAACTGCCATCCTTGAT	59.934	20	AAGCCAAACCTGAAACGAGA	59.853	20	285	556916	557200	GTGGAACTGCCATCCTTGAT	59.934	20	AGTTCACTGGGAAGGAGCAA	59.844	20	162	556916	557077
PT-561971-561976	TGGATCTCCTACCTGTTCCG	60.065	20	TTGCCAATATGTTGGGGAAT	60.016	20	255	561848	562102	TGGATCTCCTACCTGTTCCG	60.065	20	TTTCCCTTGATAGTCCGCAG	60.206	20	177	561848	562024	TGGATCTCCTACCTGTTCCG	60.065	20	CTTTCCCTTGATAGTCCGCA	60.206	20	178	561848	562025
PT-562623-562628	CTCGGCTAGCAAGAGAAGGA	59.853	20	GGGTTCGGTCCGTTATAGGT	60.074	20	233	562423	562655	TCGGCTAGCAAGAGAAGGAA	60.227	20	GGGTTCGGTCCGTTATAGGT	60.074	20	232	562424	562655	GCTAACGCGCACCCTATCTA	60.384	20	GGGTTCGGTCCGTTATAGGT	60.074	20	167	562489	562655
PT-562777-562782	ACCTATAACGGACCGAACCC	60.074	20	CTTCCGTTTCAAACTTTCGC	59.861	20	242	562636	562877	ACCTATAACGGACCGAACCC	60.074	20	GCTTCCGTTTCAAACTTTCG	59.861	20	243	562636	562878	GCAGTGCGATGTCGTACCTA	59.895	20	CTTCCGTTTCAAACTTTCGC	59.861	20	257	562621	562877
PT-563537-563542	GCGACAGGAAAAGCTACCAC	59.882	20	GAGTGAAAGCAAGCGTAGGG	60.015	20	233	563459	563691	GCGACAGGAAAAGCTACCAC	59.882	20	TTCCCTGGCTTAGGTTCCTT	60.068	20	191	563459	563649	GCGACAGGAAAAGCTACCAC	59.882	20	ACCCCTACGCCTAGGAAGAA	60.089	20	170	563459	563628
PT-563705-563711	CCCTACGCTTGCTTTCACTC	60.015	20	TGAACACCAACCCAATCTCA	59.935	20	231	563672	563902	AAGGAACCTAAGCCAGGGAA	60.068	20	AAAACATCGCCGATCTCATC	60.043	20	188	563630	563817	CCCTACGCTTGCTTTCACTC	60.015	20	AGGGAAACTGCAAAACATCG	60.11	20	157	563672	563828
PT-564551-564551	TACTTTTGGGGCAGTGGAAC	59.971	20	GCTCGAATATCGCAGTAGGC	59.973	20	243	564428	564670	CTTACTTTTGGGGCAGTGGA	60.103	20	GCTCGAATATCGCAGTAGGC	59.973	20	245	564426	564670	TCCTTACTTTTGGGGCAGTG	60.103	20	GCTCGAATATCGCAGTAGGC	59.973	20	247	564424	564670
PT-565140-565160	GCAGAGCGCTCCTTATATGC	60.11	20	AACACCGAGTGGGATCAAAG	59.966	20	281	565094	565374	GCAGAGCGCTCCTTATATGC	60.11	20	CTTGGTTCTCTCGCTCCTTG	60.126	20	197	565094	565290	CGCTCCTTATATGCGGGTAG	59.72	20	AACACCGAGTGGGATCAAAG	59.966	20	275	565100	565374
PT-565227-565227	GCAGAGCGCTCCTTATATGC	60.11	20	AACACCGAGTGGGATCAAAG	59.966	20	281	565094	565374	GCAGAGCGCTCCTTATATGC	60.11	20	CTTGGTTCTCTCGCTCCTTG	60.126	20	197	565094	565290	CGCTCCTTATATGCGGGTAG	59.72	20	AACACCGAGTGGGATCAAAG	59.966	20	275	565100	565374
PT-569925-569926	TTCTTTTCCTGCTACACCCG	60.241	20	GTGATTTCTGCGGGTCCTTA	60.074	20	259	569770	570028	GTTCCGTCTTCCGTTCAGTC	59.703	20	GTGATTTCTGCGGGTCCTTA	60.074	20	182	569847	570028	TTCTTTTCCTGCTACACCCG	60.241	20	TGATTTCTGCGGGTCCTTAG	60.206	20	258	569770	570027
PT-570014-570023	CAAGCCCGGTGAAGAAATTA	60.067	20	ACCTTTTTCGTCGTGTTTGC	60.154	20	182	569906	570087	CAAGCCCGGTGAAGAAATTA	60.067	20	ATTTCAACATTTTCGGTGCC	59.807	20	273	569906	570178	CAAGCCCGGTGAAGAAATTA	60.067	20	GGAAATGTTGGCATGAGGTT	59.797	20	299	569906	570204
PT-571377-571390	TTATGCTGCCACAGAACTGC	60.019	20	GGGTGACCTGCAAAAGAAAA	60.088	20	261	571348	571608	CTAGTGAATGCCTCCTCCCA	60.21	20	AAGCAATCTTGTGGCAGCTT	60.022	20	252	571293	571544	CAAGCAACCCCTTTTCTTCA	60.22	20	AAGCAATCTTGTGGCAGCTT	60.022	20	234	571311	571544
PT-572320-572320	CCGACTCTCATGGCACCTAT	60.096	20	GATAGGGTCCGACTTGGTCA	59.927	20	269	572274	572542	CCGACTCTCATGGCACCTAT	60.096	20	TGATAGGGTCCGACTTGGTC	59.927	20	270	572274	572543	CCGACTCTCATGGCACCTAT	60.096	20	TGCACTGGATGAGCGAGTAG	60.16	20	244	572274	572517
PT-572496-572496	TATTGGTGTTCTCCTTGCCC	59.933	20	GATAGGGTCCGACTTGGTCA	59.927	20	199	572344	572542	TATTGGTGTTCTCCTTGCCC	59.933	20	TGATAGGGTCCGACTTGGTC	59.927	20	200	572344	572543	CCGACTCTCATGGCACCTAT	60.096	20	GATAGGGTCCGACTTGGTCA	59.927	20	269	572274	572542
PT-574955-574955	CCCATTGGCAATACGTTAGG	60.202	20	AGTTAGGATCCGGAAGGCAT	59.925	20	165	574893	575057	TTGGGCGTTGTAAGCCTAGT	59.769	20	AGTTAGGATCCGGAAGGCAT	59.925	20	264	574794	575057	CCCATTGGCAATACGTTAGG	60.202	20	AGCAAATCAAGGGTTTGCAC	60.118	20	192	574893	575084
PT-575450-575450	ACACTTCCAAATGCCACCTC	59.973	20	TTGATTGGGAAAGCTGGTTC	60.051	20	190	575303	575492	ACACTTCCAAATGCCACCTC	59.973	20	TTCAATTTAGACGATCCGGG	59.894	20	285	575303	575587	CACTTCCAAATGCCACCTCT	60.111	20	TTGATTGGGAAAGCTGGTTC	60.051	20	189	575304	575492
PT-577137-577143	GGAACTCGAAAGCGTCAGTC	59.997	20	TGCAATGAACGGAGCTACAG	60.011	20	218	576999	577216	AAAGGAACTCGAAAGCGTCA	59.993	20	TGCAATGAACGGAGCTACAG	60.011	20	221	576996	577216	GGAACTCGAAAGCGTCAGTC	59.997	20	CATCAAAATGCAATGAACGG	59.93	20	226	576999	577224
PT-578828-578834	ACGCCCTTTCATCACACTTC	60.119	20	GCACCACCAGCTACAGGAAT	60.142	20	180	578738	578917	ACGCCCTTTCATCACACTTC	60.119	20	GTGAAAGAAGGCAAGGACCA	60.232	20	222	578738	578959	ACGCCCTTTCATCACACTTC	60.119	20	GGACCAGGGACATGGTACAG	60.238	20	208	578738	578945
PT-580191-580192	CAGAAAGAAAGGAAGCTGCG	60.262	20	AATGTTGAGGAACGAATGCC	59.939	20	234	580123	580356	CAGAAAGAAAGGAAGCTGCG	60.262	20	AAGCAGAACGCGGAACTCTA	60.154	20	299	580123	580421	CAGAAAGAAAGGAAGCTGCG	60.262	20	CTGAACGTACAGCGAGACGA	60.199	20	162	580123	580284
PT-582543-582543	ACAGTGGGGTAAGGCACAAG	60.028	20	CGCATAAGGGCTTAGACGAG	59.996	20	200	582415	582614	GGGGTAAGGCACAAGAACAA	59.971	20	CGCATAAGGGCTTAGACGAG	59.996	20	195	582420	582614	ACAGTGGGGTAAGGCACAAG	60.028	20	TCTCAGCCAAGACCGCTAAT	59.978	20	170	582415	582584
PT-584262-584266	CTTGTCGACTCTTCATGGCA	59.984	20	GGTCAACACCAAGGCAAGAT	59.973	20	239	584062	584300	CGGGAATGAGAACAAAAGGA	60.044	20	GGTCAACACCAAGGCAAGAT	59.973	20	211	584090	584300	CTGCTATATCATCCGCAGCA	59.96	20	GCCAAAGGGCTGATTCAATA	60.038	20	159	584206	584364
PT-587326-587331	GTCAGGGTTCTTCCCTCTCC	60.05	20	ATCAGAAGGAAGCGGGCTAT	60.194	20	244	587214	587457	GGGTTCTTCCCTCTCCTGTC	60.05	20	ATCAGAAGGAAGCGGGCTAT	60.194	20	240	587218	587457	CAGGCTCAAAGTCAGGGTTC	59.844	20	ATCAGAAGGAAGCGGGCTAT	60.194	20	254	587204	587457
PT-588338-588344	AGCCACGACACCTTTACCAG	60.171	20	GTTTATGACCTTGTCGCGGT	60	20	168	588221	588388	AGCCACGACACCTTTACCAG	60.171	20	AGTTTATGACCTTGTCGCGG	60.132	20	169	588221	588389	CCTTTGTTACAGGGTCAGGC	59.592	20	GTTTATGACCTTGTCGCGGT	60	20	214	588175	588388
PT-589528-589528	ACAAGCCGACTAAGAAGCCA	60.015	20	TTCATAGGCAAAATGAGGGG	59.894	20	232	589390	589621	AGCCAATGGTCCAACAGTTC	59.973	20	TTCATAGGCAAAATGAGGGG	59.894	20	217	589405	589621	GAAGCCAATGGTCCAACAGT	59.973	20	TTCATAGGCAAAATGAGGGG	59.894	20	219	589403	589621
PT-589686-589691	GAGGTTGCCAATCACGACTT	60.119	20	GCTGCTAGCTATCGGGTGAC	60.007	20	188	589540	589727	CCCCTCATTTTGCCTATGAA	59.894	20	GTCACATCGCTTCTCCATCA	59.794	20	299	589602	589900	GAATCAAAGCTCTCCCCCTC	60.154	20	GTCACATCGCTTCTCCATCA	59.794	20	239	589662	589900
PT-593990-593990	ACGTTCGGGCACCATAGATA	60.352	20	GGCATATTCGGTGCAAAAGT	59.967	20	201	593949	594149	GGGGATTGAATCGGTTGATA	59.581	20	GGCATATTCGGTGCAAAAGT	59.967	20	278	593872	594149	ACGTTCGGGCACCATAGATA	60.352	20	GGCATAGACAAAGACGGCAT	60.103	20	216	593949	594164
PT-597054-597054	CAATAGGGCCTCTTCATCCA	60.029	20	AAGGGCTCTCTCTCTCCCAG	60.088	20	270	596963	597232	CAATAGGGCCTCTTCATCCA	60.029	20	CTCCCAGACAATGAGAAGGC	59.803	20	257	596963	597219	GAGAAGAGAAGCAAGGCGTG	60.277	20	AAGGGCTCTCTCTCTCCCAG	60.088	20	205	597028	597232
PT-597658-597658	TAGTCCCGTTCTTGCTCGTT	59.875	20	CCGGGTATTCACTGGATTTG	60.184	20	233	597578	597810	TTGGGTTCGACTCCCATAAC	59.79	20	CCGGGTATTCACTGGATTTG	60.184	20	190	597621	597810	CTTGCTCGTTCTTTATGGGG	59.702	20	CCGGGTATTCACTGGATTTG	60.184	20	223	597588	597810
PT-598325-598328	AAATGGTTGAATTTGCCAGC	59.945	20	GAAATCAATCGAACCGAGGA	60.014	20	254	598295	598548	GGTCTCAGTTGGAGATGGGA	60.048	20	GGTCGAACTATTGGGAGCAA	60.074	20	157	598236	598392	GATGAGATCGGTCGAGTGGT	60.08	20	TTGGGAGCAAATGGAAAAAG	60.046	20	164	598219	598382
PT-598934-598934	TCCTCTTCTACTGGCGTTGG	60.388	20	ACGGTGCCGAATAAGTTCAC	60	20	285	598909	599193	TCGTCCGTAAACCAACCAGT	60.41	20	CTCTTCCAATGCTCCCCATA	60.029	20	210	598804	599013	TCGTCCGTAAACCAACCAGT	60.41	20	CCAATGCTCCCCATATGACT	59.773	20	205	598804	599008
PT-599254-599254	GTGAACTTATTCGGCACCGT	60	20	TCTTTCAGAGCGGACCAGTT	59.989	20	242	599174	599415	GTGAACTTATTCGGCACCGT	60	20	TTTCAGAGCGGACCAGTTTT	59.853	20	240	599174	599413	GTGAACTTATTCGGCACCGT	60	20	GTTTCCATCTTTCAGAGCGG	59.813	20	249	599174	599422
PT-599733-599738	TGATTGGTTTAGGTAGGGCG	59.953	20	CAACGTACACGCTTCCCTTT	60.168	20	293	599588	599880	TGATTGGTTTAGGTAGGGCG	59.953	20	GACAACGTACACGCTTCCCT	60.179	20	295	599588	599882	GGAATGGAGAGGGGAAACAT	60.133	20	AAGGCAGGGAGTGTGACAAC	60.159	20	206	599691	599896
PT-602040-602046	GATGGTCCTTCCGAGACAAG	59.655	20	TGCCGGTAGAAAATGGAGTC	60.074	20	289	601827	602115	TAGGATGATGGTCCTTCCGA	60.417	20	TGCCGGTAGAAAATGGAGTC	60.074	20	295	601821	602115	ATGATGGTCCTTCCGAGACA	60.475	20	TGCCGGTAGAAAATGGAGTC	60.074	20	291	601825	602115
PT-602442-602447	TCGTTCTTATGTTCCCGAGG	60.066	20	TACCGATTGGCTCTCACACA	60.263	20	164	602329	602492	TCGTTCTTATGTTCCCGAGG	60.066	20	CGATTGGCTCTCACACATTG	60.263	20	161	602329	602489	TCTTTAGGTGTCGCGAGGTT	59.875	20	GACAGTTTCGCTGGGGACTA	60.255	20	240	602394	602633
PT-603220-603226	CGAAGAGAAGGAACGAACCA	60.366	20	AAATACAATGCGATCGGAGC	60.067	20	277	603124	603400	CGGTAAATTCGCAAGGAGAA	60.202	20	CGAACGATTCAGAGAAGGGA	60.331	20	226	603093	603318	TCGAAGAGAAGGAACGAACC	59.405	20	AAATACAATGCGATCGGAGC	60.067	20	278	603123	603400
PT-603518-603523	CCGTAACCGCACTGAGTTTT	60.168	20	ACTGGATATCGATCCAACGG	59.773	20	299	603492	603790	TCCGATCGCATTGTATTTGA	60.035	20	TCCACTTGCGAGCCTATACA	59.444	20	190	603383	603572	GCTCCGATCGCATTGTATTT	60.067	20	TCCACTTGCGAGCCTATACA	59.444	20	192	603381	603572
PT-603961-603967	CCCGTAGGCAATCCAACTTA	59.953	20	TGGCCTGTATTCGGAGTTTC	60.074	20	199	603873	604071	AGCTGCTTACCTGGAACCAA	59.875	20	TTAGGTTGGCCTGTATTCGG	59.953	20	239	603839	604077	AGCTGCTTACCTGGAACCAA	59.875	20	TGGCCTGTATTCGGAGTTTC	60.074	20	233	603839	604071
PT-604601-604607	CTTGGGAATCACCTCCTTCA	60.042	20	TAAGTTTTCTCCTCGCCCAG	59.448	20	219	604459	604677	CAAGAAAGTCGTAACCCGGA	60.103	20	TAAGTTTTCTCCTCGCCCAG	59.448	20	201	604477	604677	CTTGGGAATCACCTCCTTCA	60.042	20	TTCGTCCTTTTCCTCTTTGG	59.284	20	258	604459	604716
PT-604831-604831	GCTGGCACTTCGGACTAGAA	60.538	20	TCAGGGAAGGAATCAACTGG	60.042	20	275	604610	604884	CTGGGCGAGGAGAAAACTTA	59.448	20	TCAGGGAAGGAATCAACTGG	60.042	20	227	604658	604884	CCAAAGAGGAAAAGGACGAA	59.284	20	TCAGGGAAGGAATCAACTGG	60.042	20	188	604697	604884
PT-608385-608391	TTGTCCTCAGGGATAGGGTG	59.92	20	CGAATGGACTTTCGGTCAAT	59.933	20	247	608308	608554	TTGTCCTCAGGGATAGGGTG	59.92	20	TAGGTCCAGCGAATTTGGTC	60.074	20	212	608308	608519	TCCTTCTTTGTCCTCAGGGA	59.773	20	CGAATGGACTTTCGGTCAAT	59.933	20	254	608301	608554
PT-609265-609272	CTATGTTCCTGTCGGCGATT	60.096	20	TCAACCTCTACCAACCTGGG	59.959	20	152	609239	609390	GGATTTCGCTGACATGGATT	59.9	20	TCCTTTGAAGGTATGGGCTG	60.066	20	288	609019	609306	GGATTTCGCTGACATGGATT	59.9	20	CCTTTGAAGGTATGGGCTGA	60.066	20	287	609019	609305
PT-611589-611594	CGATTTGTGGCATCTTTCCT	60.074	20	GGGATCACTCCTTTGGTTCA	59.903	20	251	611533	611783	GAATCCGATTTGTGGCATCT	59.9	20	GGGATCACTCCTTTGGTTCA	59.903	20	256	611528	611783	AGAATCCGATTTGTGGCATC	59.9	20	GGGATCACTCCTTTGGTTCA	59.903	20	257	611527	611783
PT-612032-612038	TGCCTTTTTCCCTGTTATCG	60.067	20	AAATGTCAGTCCCTTGTCCG	59.966	20	260	611975	612234	TGTTTTTGCCTTTTTCCCTG	60.081	20	AAATGTCAGTCCCTTGTCCG	59.966	20	266	611969	612234	TGCCTTTTTCCCTGTTATCG	60.067	20	TCCCTTGTCCGATTCTGTTC	60.05	20	251	611975	612225
PT-613485-613489	TACATTCTCCACCCCTTTCG	59.926	20	CAGATGAGTGGTGGGAGGTT	59.962	20	298	613460	613757	TACATTCTCCACCCCTTTCG	59.926	20	ACCCGATTCAACTGAGGATG	59.927	20	256	613460	613715	ACCAACAGCACCTGTTTTCC	60.012	20	CACGACAAGCAGAGTAGGCA	60.199	20	195	613414	613608
PT-614714-614719	GGATCTTTCCGAAAAGGAGG	60.011	20	AGTTAAAAATCCCGCCGAAC	60.312	20	289	614536	614824	GGATCTTTCCGAAAAGGAGG	60.011	20	GGGAAGAAATCAATTCGCAG	59.645	20	266	614536	614801	GGATCTTTCCGAAAAGGAGG	60.011	20	TAGTTAAAAATCCCGCCGAA	59.56	20	290	614536	614825
PT-614793-614799	GGATCTTTCCGAAAAGGAGG	60.011	20	AGTTAAAAATCCCGCCGAAC	60.312	20	289	614536	614824	GGATCTTTCCGAAAAGGAGG	60.011	20	TAGTTAAAAATCCCGCCGAA	59.56	20	290	614536	614825	GGATCTTTCCGAAAAGGAGG	60.011	20	TTAGTTAAAAATCCCGCCGA	59.56	20	291	614536	614826
PT-615129-615129	CATCTTTCTCCCCTCCCAAT	60.264	20	GTGGGTAGAACGAGAGTGGC	59.727	20	281	615019	615299	CCCAATAAAGCCAGCGATAG	59.699	20	GTGGGTAGAACGAGAGTGGC	59.727	20	267	615033	615299	TTCTCCCCTCCCAATAAAGC	60.391	20	GTGGGTAGAACGAGAGTGGC	59.727	20	276	615024	615299
PT-615909-615917	ATGGTAGTTCGCTGGGATTG	59.955	20	GGCCTTTGCTTCCTCTTCTT	59.962	20	194	615754	615947	ATGGTAGTTCGCTGGGATTG	59.955	20	AGAGCAGTCGTGTGGAAGGT	59.907	20	222	615754	615975	ATGGTAGTTCGCTGGGATTG	59.955	20	AGCAGTCGTGTGGAAGGTCT	59.907	20	220	615754	615973
PT-616198-616198	GCCGCACTATTTTTAGCCAC	59.748	20	TCGCCGTAGTGTGAGAAGTG	60.049	20	295	616175	616469	GTGCCGCACTATTTTTAGCC	59.748	20	TCGCCGTAGTGTGAGAAGTG	60.049	20	297	616173	616469	CAGTTTGGGCACTAGGCAGT	60.312	20	GCATGGGACTGTAGGTTGCT	60.142	20	247	616034	616280
PT-616416-616416	AGCAACCTACAGTCCCATGC	60.142	20	TCGCCGTAGTGTGAGAAGTG	60.049	20	209	616261	616469	GCCGCACTATTTTTAGCCAC	59.748	20	TCGCCGTAGTGTGAGAAGTG	60.049	20	295	616175	616469	GTGCCGCACTATTTTTAGCC	59.748	20	TCGCCGTAGTGTGAGAAGTG	60.049	20	297	616173	616469
PT-616971-616971	GCAACTTCAATCTCAGGGGA	60.195	20	GGTTACGGGTGAGCTACGAG	59.757	20	263	616849	617111	GCAACTTCAATCTCAGGGGA	60.195	20	GGACTCCAGCGCTTAGAAGA	59.717	20	222	616849	617070	GCAACTTCAATCTCAGGGGA	60.195	20	ACGAGCAGGCTTGATACCAC	60.285	20	248	616849	617096
PT-625205-625205	CACTCGCTCGAATGTGGTTA	59.864	20	GATTAGAGGGGCAGCAGATG	59.797	20	274	625166	625439	TCCGGTCTTGTTCTACCAGG	60.103	20	ACAGATGGACCCACTGCTTT	59.579	20	258	624993	625250	GCTCCGGTCTTGTTCTACCA	60.255	20	ACAGATGGACCCACTGCTTT	59.579	20	260	624991	625250
PT-628073-628086	GAGAGCCAGCCATTAAGCAC	59.985	20	GGAACCCTTCAACGGAAAAT	60.166	20	291	627958	628248	TACTGAGGAGAGCCAGCCAT	59.973	20	GGAACCCTTCAACGGAAAAT	60.166	20	298	627951	628248	GAGAGCCAGCCATTAAGCAC	59.985	20	TGTTATGCATCCTTGCTCCA	60.22	20	194	627958	628151
PT-628136-628180	TAATTGTGAACGAAGCAGCG	60.014	20	GGAACCCTTCAACGGAAAAT	60.166	20	171	628078	628248	GAGAGCCAGCCATTAAGCAC	59.985	20	GGAACCCTTCAACGGAAAAT	60.166	20	291	627958	628248	TACTGAGGAGAGCCAGCCAT	59.973	20	GGAACCCTTCAACGGAAAAT	60.166	20	298	627951	628248
PT-631377-631377	CCATTTTCAATGGGCTTTGT	59.801	20	TTCCAAGAAGCCCCCTATTT	59.903	20	238	631349	631586	CCATTTTCAATGGGCTTTGT	59.801	20	CCCCCTATTTCGAAGGAGTC	59.897	20	228	631349	631576	CCATTTTCAATGGGCTTTGT	59.801	20	CTCTGCACCCACACTCAAAA	59.873	20	151	631349	631499
PT-631576-631576	TTTTGAGTGTGGGTGCAGAG	59.873	20	TTGCTGAGAGGGAGCTTGAT	60.096	20	296	631480	631775	CTTTCTCTTCCGGGACCTTC	60.183	20	TTGCTGAGAGGGAGCTTGAT	60.096	20	270	631506	631775	CCATTTTCAATGGGCTTTGT	59.801	20	TGCCCCTTCCATCTCTGTAT	59.508	20	268	631349	631616
PT-631997-632001	TAGAGTGGAGCACAGCGAAA	59.74	20	CGTTCCTTCATTAGCTCCCA	60.206	20	268	631963	632230	GAGCTGGACACCCACCTAGA	60.261	20	CGTTCCTTCATTAGCTCCCA	60.206	20	284	631947	632230	ATCAAGCTCCCTCTCAGCAA	60.096	20	AGAGTAGGGGCCGTGTTTTC	60.496	20	292	631756	632047
PT-640139-640145	CCATAATAGGCATGATGGGG	59.994	20	TGCAATTATGCTCCTTGCAG	59.976	20	152	640041	640192	CAGGATCTCACCACCCAGTT	59.962	20	TGCAATTATGCTCCTTGCAG	59.976	20	195	639998	640192	AGGATCTCACCACCCAGTTG	59.962	20	TGCAATTATGCTCCTTGCAG	59.976	20	194	639999	640192
PT-640287-640293	TGCAAGGAGCATAATTGCAG	59.976	20	TGGAAGAGAGAGAATCGGGA	59.879	20	276	640174	640449	CGACGATCGATAACCGAACT	60.096	20	TGGAAGAGAGAGAATCGGGA	59.879	20	295	640155	640449	ACGATCGATAACCGAACTGC	60.103	20	TGGAAGAGAGAGAATCGGGA	59.879	20	293	640157	640449
PT-641094-641100	AGGTTTTGCAGTTCCCCTCT	60.11	20	TGCGAGAATAGGAAGGAGGA	59.91	20	246	641029	641274	TTCTCTCCAACACAGCAACG	60.025	20	TGCCGTCGATGATGAACTTA	60.22	20	230	640913	641142	AGGGAAACTATGGGCGAGAT	59.925	20	TGCCGTCGATGATGAACTTA	60.22	20	181	640962	641142
PT-641874-641880	TTTCGTCTCTGCAAACATGG	59.84	20	ACTCCGAAACAATCCCTCCT	59.935	20	246	641821	642066	TTAGCTAGGCGAGCGTTAGG	59.779	20	CAGTGGAGACAAAGCAACGA	60.025	20	173	641784	641956	TTAGCTAGGCGAGCGTTAGG	59.779	20	TCAGTGGAGACAAAGCAACG	60.025	20	174	641784	641957
PT-642485-642490	CCTCTTACAACCTTGAGCGG	59.869	20	ATGGAGGAGTCCATTGTTGC	59.934	20	232	642392	642623	AAGCTTAACCTCTCCAGGGC	59.848	20	ATGGAGGAGTCCATTGTTGC	59.934	20	258	642366	642623	CCTCTTACAACCTTGAGCGG	59.869	20	TGACCGGTACCCTAATGGAG	59.807	20	246	642392	642637
PT-646043-646045	AGTAGCTCCCCGGTTAGAGC	59.87	20	AAGAAGGTCAGGATCAGCGA	59.95	20	269	645914	646182	CCGGTTAGAGCACGATAGGA	60.227	20	AAGAAGGTCAGGATCAGCGA	59.95	20	260	645923	646182	AGTAGCTCCCCGGTTAGAGC	59.87	20	AGGTAGCTGCTCCGTCTCAA	60.156	20	287	645914	646200
PT-646592-646597	GAATATCGGGACTTGGCTGA	60.036	20	GGCTGGACAGCTGAGGTAAG	60.012	20	196	646515	646710	GGGACGAGTCAATCAACCAT	59.786	20	GGCTGGACAGCTGAGGTAAG	60.012	20	252	646459	646710	GGGACGAGTCAATCAACCAT	59.786	20	ATAAGAGGCAACAGCCGAGA	59.978	20	216	646459	646674
PT-647440-647440	TGCTTGGGACAGAACTGATG	59.831	20	GATGAATTTGAGCAATGGGG	60.274	20	246	647377	647622	TGCTTGGGACAGAACTGATG	59.831	20	GGATGAATTTGAGCAATGGG	60.274	20	247	647377	647623	TGCTTGGGACAGAACTGATG	59.831	20	AGCGGATGAATTTGAGCAAT	59.674	20	250	647377	647626
PT-650082-650082	AAAGAAACCACTCACCCACG	60.005	20	TCCGTCTTTGTCGAGCTTCT	60.134	20	161	650056	650216	AAAGAAACCACTCACCCACG	60.005	20	CTCCGTCTTTGTCGAGCTTC	60.134	20	162	650056	650217	AAAGAAACCACTCACCCACG	60.005	20	TCTCCGTCTTTGTCGAGCTT	60.134	20	163	650056	650218
PT-655699-655705	AATTCCCTTTCCCGCTCTTA	60.034	20	TCGCCAGCTAGTCTTGGAAT	59.978	20	237	655581	655817	TTGATTCCCGAAAAGGACAC	59.91	20	TCGCCAGCTAGTCTTGGAAT	59.978	20	288	655530	655817	TCGAGTAAATCCCTCCCCTT	59.897	20	TCGCCAGCTAGTCTTGGAAT	59.978	20	158	655660	655817
PT-656189-656189	AGCGTCTTCCTCCCTTCTTC	59.957	20	CAAGGCTTCCTCGTGCTAAG	60.147	20	298	655929	656226	CGGTCACCCCTTGACTTCTA	60.103	20	CAAGGCTTCCTCGTGCTAAG	60.147	20	264	655963	656226	GTCACTTTCCTTTTCCGCTG	59.853	20	CAAGGCTTCCTCGTGCTAAG	60.147	20	228	655999	656226
PT-656310-656322	CTTAGCACGAGGAAGCCTTG	60.147	20	ATGGAGGGAACCAAGAATCC	60.133	20	237	656207	656443	AAGGAAACCTAGCTCCTCGG	59.842	20	ATGGAGGGAACCAAGAATCC	60.133	20	277	656167	656443	CTACTTGCCTGAGCCCCATA	60.227	20	ATGGAGGGAACCAAGAATCC	60.133	20	205	656239	656443
PT-658068-658075	CCACCAGTCATAGCGGAACT	60.134	20	CCCATTAAGAGACCGACCAA	59.926	20	179	657927	658105	CAGCACACCTAGCAGCCATA	60.035	20	CACCCGAATCCCTTTGTTTA	59.795	20	151	658042	658192	TGCTCATTTGGAGGCCTATC	60.177	20	CCCATTAAGAGACCGACCAA	59.926	20	276	657830	658105
PT-660142-660148	CCTTTGCCCAGGACTTCATA	60.066	20	TCTCTGAGATGCTTAGCGCA	59.995	20	151	660111	660261	CCTTTGCCCAGGACTTCATA	60.066	20	TCCTCGACTTCCTCGTCCTA	59.943	20	187	660111	660297	CCCTTAGGATCTCCTCTGCC	60.169	20	TCTCTGAGATGCTTAGCGCA	59.995	20	233	660029	660261
PT-660687-660692	TTTCTTTCGAGGGTTGAGGA	59.784	20	CTCGAAAGCCATCTAGCACC	59.978	20	225	660599	660823	TTTCGAGGGTTGAGGACAAG	60.224	20	CTCGAAAGCCATCTAGCACC	59.978	20	221	660603	660823	CTTTCGAGGGTTGAGGACAA	60.224	20	CTCGAAAGCCATCTAGCACC	59.978	20	222	660602	660823
PT-663648-663648	GAGAGAGGCTGTCGGCTATG	60.119	20	GACAGCCGCCTAAAACTCTG	60.015	20	241	663484	663724	TAGGCTTTCAGGTGCCTTGT	59.875	20	AGCTTCAGTCCCAGCGTAAA	60.015	20	296	663561	663856	GTAGGCTTTCAGGTGCCTTG	59.875	20	AGCTTCAGTCCCAGCGTAAA	60.015	20	297	663560	663856
PT-664293-664299	ACAGCCGTCTGATGGAAAAC	60.119	20	ATAGCAATCGGGCTACCCTT	59.951	20	297	664183	664479	ACAGCCGTCTGATGGAAAAC	60.119	20	AATAGCAATCGGGCTACCCT	59.951	20	298	664183	664480	ACAGCCGTCTGATGGAAAAC	60.119	20	GCTACCCTTGATGAAAAGCG	59.845	20	286	664183	664468
PT-664839-664839	TTCGATCCATTGGGTTCTTC	59.871	20	AGACAAAGAGAACCGGGCTT	60.247	20	279	664738	665016	TTCGATCCATTGGGTTCTTC	59.871	20	AAGACAAAGAGAACCGGGCT	60.247	20	280	664738	665017	CCCCTTCACCTACAAAACGA	59.964	20	GTTCACCAAGAAATGACCCG	60.353	20	230	664635	664864
PT-666382-666388	CGTTGGCCCCTAGTTCAATA	59.953	20	CAAGGCGATCAGTGATTTGA	59.799	20	185	666231	666415	CCGTCATGGCCGTTACTAAT	59.845	20	CAAGGCGATCAGTGATTTGA	59.799	20	225	666191	666415	CGTTGGCCCCTAGTTCAATA	59.953	20	AGATTAGAACGGAGCGCAAG	59.615	20	201	666231	666431
PT-666739-666739	GGAAAGCATGGGAGAAAGAA	59.244	20	CCGTCGACTTATTGGGAAAA	59.931	20	288	666611	666898	AAAAAGCAATCAAAGTGCCC	59.205	20	CCGTCGACTTATTGGGAAAA	59.931	20	256	666643	666898	TTTACCAACGGAAAGCATGG	60.856	20	CCGTCGACTTATTGGGAAAA	59.931	20	297	666602	666898
PT-670396-670402	ATTACCTCAAGGAAGGCGGT	59.962	20	TACCAAGTGGTTCCCCTCAG	59.959	20	275	670349	670623	ATTACCTCAAGGAAGGCGGT	59.962	20	GTTACGTCTCCGTGGGCTTA	60.132	20	237	670349	670585	ATTACCTCAAGGAAGGCGGT	59.962	20	GTGTTAGCCGGGAAGTTACG	59.632	20	251	670349	670599
PT-671863-671888	TTTGATTAAGTTGCTCGGGG	60.067	20	CCAAAAGGATGGAAGCAAGA	60.184	20	175	671775	671949	TTTGATTAAGTTGCTCGGGG	60.067	20	TCCAAAAGGATGGAAGCAAG	60.184	20	176	671775	671950	TTTGATTAAGTTGCTCGGGG	60.067	20	CTTCCAAAAGGATGGAAGCA	60.184	20	178	671775	671952
PT-673316-673316	CTAAACGACCAAGAGCGAGC	60.154	20	GGATTCATAGACGCACGGAT	59.923	20	267	673198	673464	CTAAACGACCAAGAGCGAGC	60.154	20	TTGGGAGTGAAAGAGATCGG	60.187	20	168	673198	673365	CTAAACGACCAAGAGCGAGC	60.154	20	TTTGGATTCATAGACGCACG	59.688	20	270	673198	673467
PT-673783-673788	GAGTACTGCCCAAAAGCTGC	60.022	20	GCCGATGGTGCTATCGTATT	59.951	20	220	673661	673880	GAGTACTGCCCAAAAGCTGC	60.022	20	GGTTTCCGCAAAGAAAATCA	60.053	20	277	673661	673937	ATTCCCTTCAAAGCCCAAGT	59.94	20	GCCGATGGTGCTATCGTATT	59.951	20	242	673639	673880
PT-675263-675269	AAGCAGAACCAGGAAGACGA	59.989	20	TCCAGTGCAAGTTCCCTACC	60.111	20	236	675153	675388	AAGCAGAACCAGGAAGACGA	59.989	20	ATGAAATCCATCCAGTGGGA	60.135	20	166	675153	675318	AAGCAGAACCAGGAAGACGA	59.989	20	ATGGCAGTTGCCAATTATCC	59.791	20	209	675153	675361
PT-676290-676297	GTGGCTTAGTTGGGCATGTT	60	20	CTGGTTGCTTACCACCACCT	60.028	20	295	676048	676342	GTGGCTTAGTTGGGCATGTT	60	20	ACTGGTTGCTTACCACCACC	59.891	20	296	676048	676343	GCACTGTTGCCCTTGAAACT	60.299	20	CTCAACCCTTGAGCCAGAAG	59.982	20	297	676078	676374
PT-676870-676875	CGACCCCATAGGATAGAGCA	60.051	20	CGCTAGGGTAGAGGGTAGGG	60.102	20	277	676842	677118	CGACCCCATAGGATAGAGCA	60.051	20	CCGCTAGGGTAGAGGGTAGG	60.102	20	278	676842	677119	CGACCCCATAGGATAGAGCA	60.051	20	TAGTTTCCTCCAGCAAGGGA	59.807	20	244	676842	677085
PT-677139-677139	CTCCAACATCGAGGTGAGGT	60.112	20	TCCTGGGTTATCCTGACGAG	60.065	20	198	676979	677176	CCAACATCGAGGTGAGGTCT	60.112	20	TCCTGGGTTATCCTGACGAG	60.065	20	196	676981	677176	CTCCAACATCGAGGTGAGGT	60.112	20	CCTGGGTTATCCTGACGAGA	60.065	20	197	676979	677175
PT-677569-677575	AGTTCCAAGACCCCTTCGAT	59.935	20	TTGAGCGGTACCTCATAGGG	60.088	20	219	677511	677729	TGAGTCAGTTCCAAGACCCC	60.088	20	TTGAGCGGTACCTCATAGGG	60.088	20	225	677505	677729	AGTTCCAAGACCCCTTCGAT	59.935	20	CCTCATAGGGCTACTGCTGG	59.853	20	209	677511	677719
PT-677929-677934	TACCCCATCCCTAACAACCA	60.044	20	AAGCATCAAAGCCCATAACG	60.096	20	255	677798	678052	TACCCCATCCCTAACAACCA	60.044	20	TCCAAAGAATGATTCCCCAA	60.244	20	175	677798	677972	TACCCCATCCCTAACAACCA	60.044	20	TTCCAAAGAATGATTCCCCA	60.244	20	176	677798	677973
PT-678796-678801	TAATCCATGCAGGTATGCCA	59.914	20	ATTAGAGCCTTTGCGCCTTT	60.352	20	275	678616	678890	ACGAGGGGGAAGTCAAGAGT	60.111	20	ATTAGAGCCTTTGCGCCTTT	60.352	20	185	678706	678890	TAATCCATGCAGGTATGCCA	59.914	20	CCTTTGCGCCTTTCCTAGTT	60.731	20	268	678616	678883
PT-679720-679726	TGTGTTCTTTGGCAGGACAG	59.873	20	GCCTAGGAGGGATCGAGTCT	59.801	20	179	679643	679821	CCAAGCAAGTAAAGGCGAAG	60.011	20	TTTGTAATGACGGGGTTGCT	60.365	20	298	679695	679992	CCAAGCAAGTAAAGGCGAAG	60.011	20	CTTTGTAATGACGGGGTTGC	60.365	20	299	679695	679993
PT-680296-680301	ACCGGGGAATCTCTCGTACT	59.957	20	TGAAGGGACCTATCGTGACC	59.927	20	200	680160	680359	ACCGGGGAATCTCTCGTACT	59.957	20	ATGGCCTTTTGCATTTGAAG	60.074	20	215	680160	680374	GACGAAGATGCATCGACAGA	59.95	20	TGAAGGGACCTATCGTGACC	59.927	20	233	680127	680359
PT-683177-683183	TTCCTGCATCGGTTAGTTCC	60.074	20	AAGTTAACGAACGGGTGGTG	59.891	20	195	683075	683269	TTCCTGCATCGGTTAGTTCC	60.074	20	ACAAGTTAACGAACGGGTGG	59.891	20	197	683075	683271	TTCCTGCATCGGTTAGTTCC	60.074	20	CAAGTTAACGAACGGGTGGT	59.891	20	196	683075	683270
PT-683472-683478	AGAAGCGACCTTGCTTTCAA	60.132	20	TGGTATGGAATCTTCCTCGG	59.887	20	215	683440	683654	TCCAGCGCTTCTTATTTTGG	60.335	20	TCCCTAATGTGTCGTCCTCC	59.927	20	299	683273	683571	CCAGCGCTTCTTATTTTGGA	60.335	20	TCCCTAATGTGTCGTCCTCC	59.927	20	298	683274	683571
PT-684397-684402	CCCTTACAGGGAACAACAGC	59.592	20	CGAATCCTGGCTGTGAGTAAG	59.883	21	274	684157	684430	CCCTTACAGGGAACAACAGC	59.592	20	CGAATCCTGGCTGTGAGTAA	58.874	20	274	684157	684430	CCCTTACAGGGAACAACAGC	59.592	20	CCGAATCCTGGCTGTGAGTA	61.196	20	275	684157	684431
PT-685503-685508	ATGATTTGTGAAAGGGAGCG	60.074	20	AGCATTTCTGAAACCGTGCT	59.882	20	294	685322	685615	ATGATTTGTGAAAGGGAGCG	60.074	20	ACAACCAAACCAAGGGACAG	59.861	20	256	685322	685577	ATGATTTGTGAAAGGGAGCG	60.074	20	TTCCAAGTTAGGCTGCTGCT	60.154	20	228	685322	685549
PT-685564-685569	AGCAGCAGCCTAACTTGGAA	60.154	20	AAGAAAGGCGATGTTCGCTA	59.982	20	192	685530	685721	AGCAGCAGCCTAACTTGGAA	60.154	20	TAAGAAAGGCGATGTTCGCT	59.982	20	193	685530	685722	ATGATTTGTGAAAGGGAGCG	60.074	20	AGCATTTCTGAAACCGTGCT	59.882	20	294	685322	685615
PT-686722-686729	GGAATTTTCTGCTCGCTACG	59.982	20	AGCCGGAATTCCATTAAGGT	59.799	20	239	686522	686760	GGAATTTTCTGCTCGCTACG	59.982	20	GCATAGCCCAGGTGCTTTTA	60.23	20	263	686522	686784	GAATTTTCTGCTCGCTACGC	60.124	20	AGCCGGAATTCCATTAAGGT	59.799	20	238	686523	686760
PT-688432-688432	TTACATCGTCCGAGAGAGGC	60.362	20	CCATGGGAGCTACCTTTTCA	60.066	20	234	688250	688483	TCCAGAGGCATCTTCCATTC	60.158	20	GGGAGCTACCTTTTCAGGGT	59.576	20	196	688284	688479	AGTTCCAGAGGCATCTTCCA	59.803	20	GGGAGCTACCTTTTCAGGGT	59.576	20	199	688281	688479
PT-688482-688482	AAATTTCTTGGAACGGGGTC	60.166	20	CAAGGTGCGCATAAGTTTCA	59.872	20	227	688432	688658	AAATTTCTTGGAACGGGGTC	60.166	20	GACAAGCGGATGACTTTCGT	60.263	20	293	688432	688724	AAATTTCTTGGAACGGGGTC	60.166	20	AAGCGGATGACTTTCGTGAG	60.397	20	290	688432	688721
PT-688542-688570	AAATTTCTTGGAACGGGGTC	60.166	20	CAAGGTGCGCATAAGTTTCA	59.872	20	227	688432	688658	AAATTTCTTGGAACGGGGTC	60.166	20	GACAAGCGGATGACTTTCGT	60.263	20	293	688432	688724	AAATTTCTTGGAACGGGGTC	60.166	20	AAGCGGATGACTTTCGTGAG	60.397	20	290	688432	688721
PT-690476-690477	GGTTCTCGCTCATCTCTTGG	59.95	20	ACCAACCGACAAATCCGTAG	59.853	20	232	690379	690610	GTTCTCGCTCATCTCTTGGG	59.95	20	ACCAACCGACAAATCCGTAG	59.853	20	231	690380	690610	TTGGAGGTTCTCGCTCATCT	59.95	20	ACCAACCGACAAATCCGTAG	59.853	20	237	690374	690610
PT-691051-691051	ATGAACAACAGTTCTCCGCC	60.119	20	TCCTGTCAAGTATGCTCCCC	60.073	20	157	690955	691111	ATGAACAACAGTTCTCCGCC	60.119	20	AATCGAAGTGGGGGATCTCT	59.896	20	195	690955	691149	ATGAACAACAGTTCTCCGCC	60.119	20	GGATCTCTTTACCGCCTGTG	59.694	20	183	690955	691137
PT-692915-692915	CTCGCTTTCTCTCAGCCACT	59.891	20	TAATCAATGAACCCCCGAAA	60.124	20	261	692759	693019	CTCGCTTTCTCTCAGCCACT	59.891	20	ACCAAGCCTAACTGGTCACG	60.171	20	220	692759	692978	AGGCGCGCTACAACTAACAT	59.933	20	TTGAGTTGGAGGGACTTTCG	60.224	20	298	692643	692940
PT-697066-697066	CCCTCTTCAATTCCCAATGA	59.864	20	TGATTCCAGCCGAGAAGACT	59.95	20	257	696915	697171	TTCTCCCCTCTTCAATTCCC	60.38	20	TGATTCCAGCCGAGAAGACT	59.95	20	262	696910	697171	TCCCCTCTTCAATTCCCAAT	60.632	20	TGATTCCAGCCGAGAAGACT	59.95	20	259	696913	697171
PT-697303-697303	AGTCTTCTCGGCTGGAATCA	59.95	20	AACTTCCATTTTGAGACCGC	59.174	20	223	697152	697374	AGTCTTCTCGGCTGGAATCA	59.95	20	AGCGGCCCTAAAATACCTTT	59.145	20	261	697152	697412	AGTCTTCTCGGCTGGAATCA	59.95	20	ACTTCGATTATGAGTCGGGG	59.006	20	292	697152	697443
PT-698389-698390	CCCGATCATGATATTGAGGG	60.111	20	TGATTTGGAAGCTTGCTGTG	59.988	20	222	698276	698497	CCCGATCATGATATTGAGGG	60.111	20	TGTGTGAACCTCAGCGAGTC	60.03	20	180	698276	698455	AAAATGGCTGGAACAGCAAC	60.118	20	TGTGTGAACCTCAGCGAGTC	60.03	20	250	698206	698455
PT-699763-699768	GCGCTTACTCTGCCATCTCT	59.746	20	CAAGCAAGTCATGCCCCTAT	60.096	20	289	699677	699965	TTATCTGGGTGAAGGGATGG	59.744	20	CAAGCAAGTCATGCCCCTAT	60.096	20	236	699730	699965	TATCTGGGTGAAGGGATGGA	60.272	20	CAAGCAAGTCATGCCCCTAT	60.096	20	235	699731	699965
PT-700671-700673	TAGCGCCCTAGGCTATTTGA	59.964	20	CTCAACGGATGGAGAGAAGC	59.95	20	238	700590	700827	GCCCCCTTTATGAGTAAGCC	59.93	20	CTCAACGGATGGAGAGAAGC	59.95	20	180	700648	700827	TAGCGCCCTAGGCTATTTGA	59.964	20	TTACTTAGGCAATGCCGACC	60.096	20	199	700590	700788
PT-702901-702901	ACGAAGAAGTGGGCTCAAGA	59.989	20	CCCAGACCCATCCTTACTCA	59.92	20	201	702737	702937	GAGGCCATCCAAAAGAATGA	60.014	20	AAGACCGTAGCCAAAAGCAA	59.883	20	287	702843	703129	GAGGCCATCCAAAAGAATGA	60.014	20	AAAGACCGTAGCCAAAAGCA	59.883	20	288	702843	703130
PT-703251-703256	TGCTTTTGGCTACGGTCTTT	59.883	20	GCGCAAGCTAGGGACATTAC	59.873	20	191	703111	703301	TTGCTTTTGGCTACGGTCTT	59.883	20	GCGCAAGCTAGGGACATTAC	59.873	20	192	703110	703301	AACAAGGCCGGAAGAAAGTT	60.11	20	GGTGATAGGACAGGGTTCCA	59.779	20	181	703164	703344
PT-703740-703740	CCAAAAAGCTAACCCAACCA	59.968	20	GCTTCGATGAGCCCTAGATG	59.939	20	266	703543	703808	ATCAATCCCAGATCCATCCA	60.096	20	CCGATAGAGGGCATCGTAAA	60.053	20	197	703708	703904	TCAATCCCAGATCCATCCAT	60.096	20	CCGATAGAGGGCATCGTAAA	60.053	20	196	703709	703904
PT-706628-706630	TGAATGAATCCCATCCCCTA	60.088	20	TTCTCAGCCCCCTAACCTTT	60.068	20	280	706585	706864	AATGAATCCCATCCCCTAGC	60.117	20	TTCTCAGCCCCCTAACCTTT	60.068	20	278	706587	706864	TGAATGAATCCCATCCCCTA	60.088	20	GAAGCTGGCTGCTCTGCTAT	59.888	20	192	706585	706776
PT-710524-710524	TTCCCTCTAAAGCAGGGGTT	60.068	20	AAAGAGAAGGGGAAGAAGCG	59.955	20	296	710345	710640	TTCCCTTCGTTCCACTCATC	60.05	20	AATCACTTGAGATGCTGGGG	60.073	20	181	710370	710550	TTCCCTCTAAAGCAGGGGTT	60.068	20	AATCACTTGAGATGCTGGGG	60.073	20	206	710345	710550
PT-710655-710664	CGCTTCTTCCCCTTCTCTTT	59.955	20	GAGCTGCCAACCCTAGTCAG	60.012	20	191	710621	710811	CCCCAGCATCTCAAGTGATT	60.073	20	GAGCTGCCAACCCTAGTCAG	60.012	20	281	710531	710811	CGCTTCTTCCCCTTCTCTTT	59.955	20	GTCAGCAAGCTGAAAAAGCC	60.14	20	176	710621	710796
PT-713144-713144	TAACCTTCCCCGATTGACAG	59.926	20	GAAAAGGAAGTGATCGAGCG	59.955	20	202	712996	713197	TCTCCAGGTGTTGTCACCAA	60.129	20	GAAAAGGAAGTGATCGAGCG	59.955	20	222	712976	713197	GCAGCTTTCAAGGTCTCGTC	60.142	20	GAAAAGGAAGTGATCGAGCG	59.955	20	155	713043	713197
PT-714259-714265	AGCTTTGAAGCCGTAGCTTG	59.791	20	CAACCGAGACCCCGTTAGTA	59.986	20	157	714222	714378	CGTAGCTTGCTGGTTTTTCC	59.883	20	CTGCGCTCTTTGGACTTTTC	60.132	20	211	714233	714443	CGTAGCTTGCTGGTTTTTCC	59.883	20	TCTGCGCTCTTTGGACTTTT	60.132	20	212	714233	714444
PT-714656-714661	TCCATGGATCACAGACGGTA	59.918	20	CCGGTAGATCCGTTCTGAAA	60.066	20	238	714483	714720	CATCCAATGCATGATTTTCG	59.891	20	TTTTAGCCTTCCCTGCTTCA	59.953	20	280	714559	714838	CATCCAATGCATGATTTTCG	59.891	20	CCGGTAGATCCGTTCTGAAA	60.066	20	162	714559	714720
PT-714927-714927	TGAAGCAGGGAAGGCTAAAA	59.953	20	CAAGAAGTGCATCTTTGCCA	59.988	20	275	714819	715093	TGAAGCAGGGAAGGCTAAAA	59.953	20	CTTGCTACCGAAACCAGAGC	60.015	20	215	714819	715033	TGAAGCAGGGAAGGCTAAAA	59.953	20	TGCTACCGAAACCAGAGCTT	60.015	20	213	714819	715031
PT-715853-715853	TCCCAGCGCTAGGTTAAAGA	59.975	20	AAGGTGTCCTCACTTTCCGA	59.697	20	185	715701	715885	TCCCAGCGCTAGGTTAAAGA	59.975	20	GAAGGTGTCCTCACTTTCCG	59.697	20	186	715701	715886	TCCCAGCGCTAGGTTAAAGA	59.975	20	ATACCAAGGGCGAAGACTGA	59.694	20	263	715701	715963
PT-716689-716689	CCTGTAATGGGGCAAAGAAA	59.931	20	CCAAGCCGAGCTATCAAGTC	59.978	20	300	716606	716905	GGCAAAGAAAGTAAGCACCG	59.883	20	CCAAGCCGAGCTATCAAGTC	59.978	20	290	716616	716905	CTCCTGTAATGGGGCAAAGA	60.066	20	ATGCCAAGGACTGGTAGACG	60.134	20	263	716604	716866
PT-716762-716762	CCTGTAATGGGGCAAAGAAA	59.931	20	CCAAGCCGAGCTATCAAGTC	59.978	20	300	716606	716905	GGCAAAGAAAGTAAGCACCG	59.883	20	CCAAGCCGAGCTATCAAGTC	59.978	20	290	716616	716905	GTGTTCATTGGAATGGAGGG	60.173	20	CCAAGCCGAGCTATCAAGTC	59.978	20	180	716726	716905
PT-716915-716932	GACTTGATAGCTCGGCTTGG	59.978	20	GCTTCCTATCCCGACATTGA	60.036	20	270	716886	717155	GACTTGATAGCTCGGCTTGG	59.978	20	CCTATCCCGACATTGAGGAA	59.887	20	266	716886	717151	GACTTGATAGCTCGGCTTGG	59.978	20	TTCCTATCCCGACATTGAGG	59.887	20	268	716886	717153
PT-717020-717026	GACTTGATAGCTCGGCTTGG	59.978	20	GCTTCCTATCCCGACATTGA	60.036	20	270	716886	717155	GACTTGATAGCTCGGCTTGG	59.978	20	CCTATCCCGACATTGAGGAA	59.887	20	266	716886	717151	GACTTGATAGCTCGGCTTGG	59.978	20	TTCCTATCCCGACATTGAGG	59.887	20	268	716886	717153
PT-717335-717335	AAGGAAGGAAGAGAGGCAGG	59.95	20	TAACCTCGGACGATTCTGCT	59.836	20	152	717302	717453	AAGGAAGGAAGAGAGGCAGG	59.95	20	AACCTCGGACGATTCTGCTA	59.836	20	151	717302	717452	AAGGAAGGAAGAGAGGCAGG	59.95	20	TTAACCTCGGACGATTCTGC	60.214	20	153	717302	717454
PT-717378-717378	AAGGAAGGAAGAGAGGCAGG	59.95	20	TAACCTCGGACGATTCTGCT	59.836	20	152	717302	717453	AAGGAAGGAAGAGAGGCAGG	59.95	20	AACCTCGGACGATTCTGCTA	59.836	20	151	717302	717452	AAGGAAGGAAGAGAGGCAGG	59.95	20	TTAACCTCGGACGATTCTGC	60.214	20	153	717302	717454
PT-717447-717447	AAGGCAGATCGGGAAGAAGT	60.212	20	TCCCATCTGAGACTGCCTCT	59.945	20	256	717218	717473	AGGCAGATCGGGAAGAAGTT	60.212	20	TCCCATCTGAGACTGCCTCT	59.945	20	255	717219	717473	GCCGCTCTCTTATAGCAGGA	59.713	20	TCCCATCTGAGACTGCCTCT	59.945	20	153	717321	717473
PT-717557-717557	AGCAGAATCGTCCGAGGTTA	59.836	20	GCTCTCATCCCGTGAATTGT	60.081	20	184	717434	717617	TAGCAGAATCGTCCGAGGTT	59.836	20	GCTCTCATCCCGTGAATTGT	60.081	20	185	717433	717617	AGCAGAATCGTCCGAGGTTA	59.836	20	ATAGATTCCCCGCATGACTG	59.917	20	291	717434	717724
PT-717590-717590	AGCAGAATCGTCCGAGGTTA	59.836	20	GCTCTCATCCCGTGAATTGT	60.081	20	184	717434	717617	TAGCAGAATCGTCCGAGGTT	59.836	20	GCTCTCATCCCGTGAATTGT	60.081	20	185	717433	717617	AGCAGAATCGTCCGAGGTTA	59.836	20	ATAGATTCCCCGCATGACTG	59.917	20	291	717434	717724
PT-717646-717647	ACAATTCACGGGATGAGAGC	60.081	20	AAGCATGGTATTTGCAAGGG	59.96	20	159	717598	717756	ACAATTCACGGGATGAGAGC	60.081	20	TGTAGCTATGGGCATCCCTC	60.059	20	250	717598	717847	ACAATTCACGGGATGAGAGC	60.081	20	TCGCATGTGTGTTATGAGCA	59.859	20	232	717598	717829
PT-717941-717941	GAGGGATGCCCATAGCTACA	60.059	20	TTTGCACGCCATGACATATT	59.96	20	236	717828	718063	TGCTCATAACACACATGCGA	59.859	20	TTTGCACGCCATGACATATT	59.96	20	254	717810	718063	CGCTTGAGGTCCTTCATTTC	59.813	20	TTTGCACGCCATGACATATT	59.96	20	174	717890	718063
PT-718067-718067	AATATGTCATGGCGTGCAAA	59.96	20	ATCTCTTGATGTTGGACCCG	59.927	20	235	718044	718278	AAATATGTCATGGCGTGCAA	59.96	20	ATCTCTTGATGTTGGACCCG	59.927	20	236	718043	718278	GAGGGATGCCCATAGCTACA	60.059	20	GTTGTGACTAGGGTCGCGTT	60.179	20	293	717828	718120
PT-718204-718205	ATATGTCATGGCGTGCAAAA	59.96	20	ATCTCTTGATGTTGGACCCG	59.927	20	234	718045	718278	AATATGTCATGGCGTGCAAA	59.96	20	ATCTCTTGATGTTGGACCCG	59.927	20	235	718044	718278	AAATATGTCATGGCGTGCAA	59.96	20	ATCTCTTGATGTTGGACCCG	59.927	20	236	718043	718278
PT-718480-718493	TGCTAATGAGGCTTCCCACT	59.836	20	TCCACTTTGGGAATGAAAGC	60.051	20	232	718331	718562	GCTAATGAGGCTTCCCACTG	59.836	20	TCCACTTTGGGAATGAAAGC	60.051	20	231	718332	718562	ATGAGGCTTCCCACTGAAGA	59.803	20	TCCACTTTGGGAATGAAAGC	60.051	20	227	718336	718562
PT-718610-718610	GCTTTCATTCCCAAAGTGGA	60.051	20	TGCTAGAACATGACGGAACG	59.864	20	215	718543	718757	TCAGACCCATAAGCCTTTGC	60.214	20	CGGGAATAAACTCCCCATTT	60.013	20	297	718586	718882	AAGAGGATTTTATGCGTGCG	60.23	20	TTAATTCCTCCGTTTGCTGG	60.067	20	189	718465	718653
PT-718642-718642	GCTTTCATTCCCAAAGTGGA	60.051	20	TGCTAGAACATGACGGAACG	59.864	20	215	718543	718757	TCAGACCCATAAGCCTTTGC	60.214	20	CGGGAATAAACTCCCCATTT	60.013	20	297	718586	718882	TCAGACCCATAAGCCTTTGC	60.214	20	TGCTAGAACATGACGGAACG	59.864	20	172	718586	718757
PT-718746-718755	TCAGACCCATAAGCCTTTGC	60.214	20	CGGGAATAAACTCCCCATTT	60.013	20	297	718586	718882	CTTAGACCCTGACTCCACGG	59.715	20	CGGGAATAAACTCCCCATTT	60.013	20	229	718654	718882	GCTTTCATTCCCAAAGTGGA	60.051	20	AAGCGGGACCAAACTATCAA	59.569	20	256	718543	718798
PT-718912-718945	GTTCCAGGAAATGGGGAGTT	60.169	20	AGGGCTCAGAAGGGAGAAAG	59.95	20	191	718855	719045	GTTCCAGGAAATGGGGAGTT	60.169	20	ACTCCCGTAACCCAAGTCCT	59.856	20	229	718855	719083	GTTCCAGGAAATGGGGAGTT	60.169	20	GGGCTCAGAAGGGAGAAAGT	59.817	20	190	718855	719044
PT-719025-719025	GTTCCAGGAAATGGGGAGTT	60.169	20	ACTCCCGTAACCCAAGTCCT	59.856	20	229	718855	719083	ATGGGGAACACACAGAGGAA	60.363	20	CAATGATCCAACGTCTGGTG	59.96	20	259	718918	719176	TGGGGAACACACAGAGGAAT	60.363	20	CAATGATCCAACGTCTGGTG	59.96	20	258	718919	719176
PT-719150-719150	CTTTCTCCCTTCTGAGCCCT	59.95	20	CAATGATCCAACGTCTGGTG	59.96	20	151	719026	719176	CTTTCTCCCTTCTGAGCCCT	59.95	20	TTAGGTGACCCTCTGATGGC	60.073	20	170	719026	719195	CTTTCTCCCTTCTGAGCCCT	59.95	20	GACCCTCTGATGGCAATGAT	59.893	20	164	719026	719189
PT-719220-719220	CACCAGACGTTGGATCATTG	59.96	20	CTCTAGCGGGTCATGAAAGC	59.978	20	261	719157	719417	GCCATCAGAGGGTCACCTAA	60.073	20	CTCTAGCGGGTCATGAAAGC	59.978	20	242	719176	719417	CACCAGACGTTGGATCATTG	59.96	20	CAAGCAAGGGTTCGGAATAA	60.067	20	240	719157	719396
PT-719344-719344	CACCAGACGTTGGATCATTG	59.96	20	CTCTAGCGGGTCATGAAAGC	59.978	20	261	719157	719417	GCCATCAGAGGGTCACCTAA	60.073	20	CTCTAGCGGGTCATGAAAGC	59.978	20	242	719176	719417	CACCAGACGTTGGATCATTG	59.96	20	CAAGCAAGGGTTCGGAATAA	60.067	20	240	719157	719396
PT-719483-719483	GACCCGCTAGAGAGGATGTG	59.827	20	ACCTGAGATTACGGTGCTGG	60.134	20	276	719406	719681	TGACCCGCTAGAGAGGATGT	59.827	20	ACCTGAGATTACGGTGCTGG	60.134	20	277	719405	719681	AGGATGTGGTTGGGAGTTCA	60.363	20	ACCTGAGATTACGGTGCTGG	60.134	20	264	719418	719681
PT-719734-719735	ATCTCAGGTGATGGGACCAG	59.92	20	TAAGCCCTCAAGCTACGCAT	60.003	20	249	719673	719921	ATCTCAGGTGATGGGACCAG	59.92	20	GTACGAAGCGGCATCTAAGC	60.01	20	264	719673	719936	CCAGCACCGTAATCTCAGGT	60.134	20	TAAGCCCTCAAGCTACGCAT	60.003	20	260	719662	719921
PT-720193-720215	ATGCGTAAGAGAGCCCTTCA	59.978	20	AGACTTAGCCCTCTCCCAGC	59.979	20	242	720069	720310	ATGCGTAAGAGAGCCCTTCA	59.978	20	GCTAAGGGCATGCAGGATAG	59.829	20	207	720069	720275	ATGCGTAAGAGAGCCCTTCA	59.978	20	AGCTAAGGGCATGCAGGATA	59.829	20	208	720069	720276
PT-720297-720297	GCTATCCTGCATGCCCTTAG	59.829	20	AGGGACGAGCGTAACAGCTA	60.037	20	179	720255	720433	CTATCCTGCATGCCCTTAGC	59.829	20	GGCCGGTAGCTAACTAAGCC	60.244	20	277	720256	720532	GCTATCCTGCATGCCCTTAG	59.829	20	GGCCGGTAGCTAACTAAGCC	60.244	20	278	720255	720532
PT-720480-720480	TAGCTGTTACGCTCGTCCCT	60.037	20	CCGAGGAGAGTTTGCAGTTC	59.989	20	192	720414	720605	CTATCCTGCATGCCCTTAGC	59.829	20	GGCCGGTAGCTAACTAAGCC	60.244	20	277	720256	720532	GCTATCCTGCATGCCCTTAG	59.829	20	GGCCGGTAGCTAACTAAGCC	60.244	20	278	720255	720532
PT-722165-722165	ACCAATAGCAGTTGATCGGG	59.955	20	AGACCAGGAGCCATTGATTG	60.073	20	265	721978	722242	ACCAATAGCAGTTGATCGGG	59.955	20	GAAGGGACCAATGGGTATGA	59.605	20	225	721978	722202	ACCAATAGCAGTTGATCGGG	59.955	20	ACCAGGAGCCATTGATTGAA	60.461	20	263	721978	722240
PT-725202-725202	TAAAGACAAAGAAGGGCGGA	59.817	20	GAAAGACGCACAAAGAAGGG	59.853	20	163	725110	725272	GAGGAGCTTGATCAAAACGG	59.813	20	GAAAGACGCACAAAGAAGGG	59.853	20	212	725061	725272	GGAGGAGCTTGATCAAAACG	59.813	20	GAAAGACGCACAAAGAAGGG	59.853	20	213	725060	725272
PT-725383-725383	CCCTTCTTTGTGCGTCTTTC	59.853	20	GAGGAAAAGGCATGACCAGA	60.195	20	265	725253	725517	CCCTTCTTTGTGCGTCTTTC	59.853	20	TGATTCCCTCCAGACAGCTT	59.803	20	188	725253	725440	TGCGTCTTTCTTTCTCCCAT	59.813	20	GAGGAAAAGGCATGACCAGA	60.195	20	255	725263	725517
PT-725439-725443	CCCTTCTTTGTGCGTCTTTC	59.853	20	GAGGAAAAGGCATGACCAGA	60.195	20	265	725253	725517	TGCGTCTTTCTTTCTCCCAT	59.813	20	GAGGAAAAGGCATGACCAGA	60.195	20	255	725263	725517	AAAGAGACCGCCCTTGATCT	60.212	20	GAGGAAAAGGCATGACCAGA	60.195	20	300	725218	725517
PT-725478-725478	CCCTTCTTTGTGCGTCTTTC	59.853	20	GAGGAAAAGGCATGACCAGA	60.195	20	265	725253	725517	TGCGTCTTTCTTTCTCCCAT	59.813	20	GAGGAAAAGGCATGACCAGA	60.195	20	255	725263	725517	AAAGAGACCGCCCTTGATCT	60.212	20	GAGGAAAAGGCATGACCAGA	60.195	20	300	725218	725517
PT-729156-729156	GCTCTTGGTCACAAAAGGGA	60.232	20	AATGAGAATTTGCGCGTAGC	60.372	20	284	729021	729304	AGCGAAAACAAAGCAAGGAG	59.632	20	AATGAGAATTTGCGCGTAGC	60.372	20	188	729117	729304	GCTCTTGGTCACAAAAGGGA	60.232	20	CAATGAGAATTTGCGCGTAG	59.467	20	285	729021	729305
PT-733465-733474	GTTGAAAAAGGGGCTTCCTC	60.053	20	GAGAACTCACTCGGGCACTC	59.993	20	263	733420	733682	AAAAAGGGGCTTCCTCACAT	59.94	20	GAGAACTCACTCGGGCACTC	59.993	20	259	733424	733682	GGCTTCCTCACATACCCTCA	60.073	20	GAGAACTCACTCGGGCACTC	59.993	20	252	733431	733682
PT-735111-735117	CTCATATGTGTGGACCTGCG	60.136	20	TGGATGGCAATATGCTTTCA	60.035	20	289	735069	735357	CTCATATGTGTGGACCTGCG	60.136	20	TTTCAACGAGAGTATGGCCC	60.074	20	154	735069	735222	CTCATATGTGTGGACCTGCG	60.136	20	TGTGGTTTGCCAATCAGAAA	60.088	20	269	735069	735337
PT-742154-742159	CTTCGGTTTGAGAGCAGGAG	60.126	20	GCGCATGATTGGTGTATGTC	59.963	20	222	742096	742317	CGTCCCTCTTACCAGTCTGC	59.867	20	GCGCATGATTGGTGTATGTC	59.963	20	249	742069	742317	CTTCGGTTTGAGAGCAGGAG	60.126	20	GTGCTGGGAAAACGATGATT	59.939	20	285	742096	742380
PT-742418-742418	AATCATCGTTTTCCCAGCAC	59.939	20	TTTTGTCAGGATGGGCTTTC	60.051	20	164	742361	742524	GATTGCCGAAAATCATCGTT	59.907	20	TTTTGTCAGGATGGGCTTTC	60.051	20	174	742351	742524	AATCATCGTTTTCCCAGCAC	59.939	20	TCCTAAACGGGTTGTGTTCC	59.83	20	260	742361	742620
PT-744822-744828	TTCGACATCTGCTTCAGTGG	59.984	20	CAACTCGGGAAATCAAGGAA	60.044	20	289	744680	744968	TGCTTCAGTGGATGCTTCTG	60.136	20	CAACTCGGGAAATCAAGGAA	60.044	20	280	744689	744968	TGCTTCAGTGGATGCTTCTG	60.136	20	GGGAATTCACCGAAGAACAA	59.91	20	255	744689	744943
PT-753229-753229	ATGACGGAACGAAAGACCAA	60.495	20	ACCGGATGATGGGAATAACA	60.014	20	194	753068	753261	ATGACGGAACGAAAGACCAA	60.495	20	ATCCTGCCACCTTTCTTGTG	60.111	20	229	753068	753296	ATGACGGAACGAAAGACCAA	60.495	20	CTGCCACCTTTCTTGTGGAT	60.111	20	226	753068	753293
PT-754506-754512	GCTATCGTGCCTCTTCCTTG	59.978	20	TACCTAAGAAGCCGAGGCAA	59.975	20	215	754412	754626	GCTATCGTGCCTCTTCCTTG	59.978	20	GCCGGTTCCTCATGTACCTA	59.955	20	229	754412	754640	GATCTTCGCTATCGTGCCTC	59.946	20	GCCGGTTCCTCATGTACCTA	59.955	20	236	754405	754640
PT-754871-754876	CTTTCCGGAATTCCAAGTGA	60.044	20	GGTCTTAACCCTCGGAGGAC	59.935	20	296	754714	755009	CTTTCCGGAATTCCAAGTGA	60.044	20	GATCTAAAGGGGGTGTGCAA	59.933	20	214	754714	754927	CTTTCCGGAATTCCAAGTGA	60.044	20	TAAAAATAGCGGACCGATGG	59.922	20	260	754714	754973
PT-755000-755005	TTCCAAATGAACCGAACCTC	59.91	20	GCCCCAACCAAGTGAAACTA	59.971	20	210	754853	755062	TTCCAAATGAACCGAACCTC	59.91	20	TATATTCGGTGGAAGGCAGG	59.916	20	240	754853	755092	TTCCAAATGAACCGAACCTC	59.91	20	GAAGGCAGGCTGAAACTCTG	60.134	20	229	754853	755081
PT-755354-755354	GAAAACTATTGCACACGCCC	60.511	20	CTAGTTCCTTGGGCACTGGA	60.246	20	281	755232	755512	GAAAACTATTGCACACGCCC	60.511	20	ACGCAAGGTGCAGGAACTAC	60.321	20	193	755232	755424	GAAAACTATTGCACACGCCC	60.511	20	TAGTTCCTTGGGCACTGGAT	59.55	20	280	755232	755511
PT-756370-756375	CTTCGCTGAGGTGAACATGA	59.984	20	TGTAGTTTCGAGGCTGGCTT	60.015	20	280	756130	756409	TCGCTGAGGTGAACATGAAG	59.984	20	TGTAGTTTCGAGGCTGGCTT	60.015	20	278	756132	756409	TCAAAGGGAACCAACCAAAG	59.942	20	GGACGACTAAGTCAGCTCGG	60.012	20	287	756326	756612
PT-757939-757944	AGCGTCCATTACAGCACCTT	59.763	20	TGAGGGCTGACTTTGTAGGG	60.246	20	209	757895	758103	AGCGTCCATTACAGCACCTT	59.763	20	AGGGCTGACTTTGTAGGGCT	60.268	20	207	757895	758101	AGCGTCCATTACAGCACCTT	59.763	20	GGAGATAGCACAACCTTGCC	59.7	20	181	757895	758075
PT-763974-763979	TTAGCTTCACCCTTGGAACG	60.241	20	GCTTGGTACGGTGAGTTGCT	60.321	20	163	763905	764067	CGTTAGCTTCACCCTTGGAA	60.241	20	GCTTGGTACGGTGAGTTGCT	60.321	20	165	763903	764067	AGCTTCACCCTTGGAACGTA	59.734	20	GCTTGGTACGGTGAGTTGCT	60.321	20	161	763907	764067
PT-764877-764877	TTTAGTTCCAGACGCAGCCT	60.015	20	GAATGGTTCCCATTTAGCGA	59.901	20	163	764790	764952	AGTTCCAGACGCAGCCTAAA	60.015	20	GAATGGTTCCCATTTAGCGA	59.901	20	160	764793	764952	TTGGGAATTCCTCCAGTGAG	60.042	20	GAATGGTTCCCATTTAGCGA	59.901	20	279	764674	764952
PT-765495-765501	CAATAGCACGGCATGAGAGA	59.972	20	GGCTGTGTTGCTTGATGAAA	59.847	20	220	765449	765668	TCGAACAACCCACTTTGACA	60.128	20	ATTCGGATGAAGGTGAGTGG	59.927	20	298	765279	765576	ACTTCCTGCAGCCCAAGTAA	59.875	20	GGCTGTGTTGCTTGATGAAA	59.847	20	199	765470	765668
PT-765828-765829	TTTCATCAAGCAACACAGCC	59.847	20	GTTCTTTTCTTTGCCAAGCG	59.996	20	212	765649	765860	ATTGGTCAATTTCGGGTCAG	59.79	20	GTTCTTTTCTTTGCCAAGCG	59.996	20	167	765694	765860	TTTCATCAAGCAACACAGCC	59.847	20	CAGAGTACCGCCCTGACAAT	60.134	20	253	765649	765901
PT-766568-766568	GTGCGAAGGATCAAACCCTA	60.074	20	ATTTCGGAAACCCAAGGACT	59.805	20	150	766522	766671	GCAACTTCCATACTGCACGA	59.871	20	GGCAGATGCAGATACGTGAA	59.83	20	177	766418	766594	GCAACTTCCATACTGCACGA	59.871	20	ATTTCGGAAACCCAAGGACT	59.805	20	254	766418	766671
PT-767647-767648	TTCATTTGGAATCTGGGCTC	60.014	20	TATTTCGTACCCCTCGCTCA	60.597	20	172	767577	767748	AAACATATGCGGCTCCAATC	59.929	20	TATTTCGTACCCCTCGCTCA	60.597	20	287	767462	767748	TTCATTTGGAATCTGGGCTC	60.014	20	CCCTCGCTCAATGAGAAAAT	59.269	20	162	767577	767738
PT-768504-768510	TGCCTGTTAGGCAAGAGGAT	59.836	20	GATACGGATCAACCCCCTCT	60.154	20	292	768418	768709	TGCCTGTTAGGCAAGAGGAT	59.836	20	CTTGCGCCAAAGATCTTACC	59.845	20	271	768418	768688	CAACATGGATTCTGGCAATG	59.924	20	CCTTTGAGACCCCGAAAAAT	60.291	20	263	768337	768599
PT-768554-768554	TGCCTGTTAGGCAAGAGGAT	59.836	20	GATACGGATCAACCCCCTCT	60.154	20	292	768418	768709	TGCCTGTTAGGCAAGAGGAT	59.836	20	CTTGCGCCAAAGATCTTACC	59.845	20	271	768418	768688	CAACATGGATTCTGGCAATG	59.924	20	CCTTTGAGACCCCGAAAAAT	60.291	20	263	768337	768599
PT-769792-769798	CACGGGTCGTGAACTTCTTT	60.149	20	GGGATTTGACGGCAGACTTA	60.074	20	171	769751	769921	CACGGGTCGTGAACTTCTTT	60.149	20	GAAATTCCCTCTGCCCCTAC	59.903	20	238	769751	769988	GTAGCTGGTCCGAGAGGATG	59.827	20	ATCATTCCGGATAACGCTTG	59.923	20	256	769617	769872
PT-770566-770571	GTCAAGTCATCATGCCCCTT	59.934	20	CAGTCACTAGCCCTGCCTTC	60.012	20	295	770501	770795	AGTCATCATGCCCCTTATGC	59.923	20	CAGTCACTAGCCCTGCCTTC	60.012	20	291	770505	770795	GTCAAGTCATCATGCCCCTT	59.934	20	CCTTGCGGTTAAGGTAACGA	60.124	20	264	770501	770764
PT-771046-771074	CTTCTTTCGTTTCTCGACGG	59.986	20	AAAAGCGAGAGAAACCCCAT	60.074	20	163	770949	771111	TGGATCACCTCCTTTTCAGG	60.042	20	AAAAGCGAGAGAAACCCCAT	60.074	20	275	770837	771111	ACCCCAAAAGAAGGGAGCTA	60.068	20	AAAAGCGAGAGAAACCCCAT	60.074	20	211	770901	771111
PT-771415-771416	ACTTTCGATTCACTCGTGGG	60.111	20	TCTTGGTCTGTGAAGATGCG	59.984	20	179	771383	771561	CATGGCGTACTCCTCCTGTT	60.134	20	TCTTGGTCTGTGAAGATGCG	59.984	20	275	771287	771561	CCTGACCCTGAGATGTGGAT	59.92	20	GCGTTGTTAGGTGCTCCATT	60.14	20	295	771250	771544
PT-771617-771618	CGCATCTTCACAGACCAAGA	59.984	20	TCGTAGTGACTGAGGGGGTC	60.112	20	273	771542	771814	CGCATCTTCACAGACCAAGA	59.984	20	CCAAGCATTCTTCTTACGGC	59.845	20	227	771542	771768	CGCATCTTCACAGACCAAGA	59.984	20	CGGCTAGATCCAATCTCCTG	59.79	20	211	771542	771752
PT-773007-773008	ATGGGATTCCAACTCAGCAC	59.934	20	GAACCGCCAAATCTGAAAAA	60.053	20	266	772917	773182	ATGGGATTCCAACTCAGCAC	59.934	20	CATAGATCGAACCGCCAAAT	59.923	20	274	772917	773190	ATGGGATTCCAACTCAGCAC	59.934	20	CGAGTTGGAGATAAGCGGAC	59.836	20	208	772917	773124
PT-773135-773135	ATGGGATTCCAACTCAGCAC	59.934	20	GAACCGCCAAATCTGAAAAA	60.053	20	266	772917	773182	ATGGGATTCCAACTCAGCAC	59.934	20	CATAGATCGAACCGCCAAAT	59.923	20	274	772917	773190	CGAGTCCGCTTATCTCCAAC	59.836	20	ATCCACCGTAAGCCTTTCCT	59.962	20	198	773102	773299
PT-774870-774877	GTTCGAGTACCAGGCGCTAC	59.904	20	CGGAGACCTGTGTTTTTGGT	60.005	20	259	774822	775080	GTTCGAGTACCAGGCGCTAC	59.904	20	TTTTTGGTAAACAGTCGCCC	59.975	20	247	774822	775068	GTTCGAGTACCAGGCGCTAC	59.904	20	CCCCCATACATGGTCTTACG	60.066	20	285	774822	775106
PT-775431-775432	TTACTGTTCCCTGGGATTGG	59.784	20	TTGCAGTCAAGCTCCCTTCT	60.134	20	281	775360	775640	TTACTGTTCCCTGGGATTGG	59.784	20	CTTGCAGTCAAGCTCCCTTC	60.134	20	282	775360	775641	TTACTGTTCCCTGGGATTGG	59.784	20	TCTTGCAGTCAAGCTCCCTT	60.134	20	283	775360	775642
PT-776937-776937	GCAGTTGGCAGATCACAGAA	59.992	20	TCCGAGGACTGCATTTAACC	60.074	20	213	776764	776976	GCAGTTGGCAGATCACAGAA	59.992	20	CGAGGACTGCATTTAACCGT	60.132	20	211	776764	776974	CGCACAACGTCCTATCTTCA	59.864	20	TCCGAGGACTGCATTTAACC	60.074	20	253	776724	776976
PT-777591-777597	GCATAGCAAGGCTACGTGGT	60.3	20	CCAAGCCAGGAAAGCTAGTG	60.008	20	237	777519	777755	AACCGATTCGATGTCAAAGG	59.933	20	GCAATAACCGCAACGAGAGT	60.278	20	282	777342	777623	CAAAGGAAAGGCGACAAAAG	59.855	20	GCAATAACCGCAACGAGAGT	60.278	20	261	777363	777623
PT-778471-778477	CCCCTTGAAAACAGACTCCA	60.081	20	GCTAACTCGCTTCCTCTCCA	59.717	20	276	778419	778694	CCCCTTGAAAACAGACTCCA	60.081	20	TGCTAACTCGCTTCCTCTCC	59.717	20	277	778419	778695	GCAAGTAGGCGAAAAAGACG	60.018	20	CTTTCATTAGCAGTCGGGCT	59.476	20	292	778222	778513
PT-778708-778708	GAGAGAGAGCGTTGGATTGG	59.95	20	TGTCCGTCCTAGCTATTGGC	60.235	20	271	778530	778800	GAGAGAGAGCGTTGGATTGG	59.95	20	AACTTGCGGTTGGAAGTCTG	60.291	20	299	778530	778828	GAGAGAGAGCGTTGGATTGG	59.95	20	TCCGTCCTAGCTATTGGCTG	60.365	20	269	778530	778798
PT-780860-780865	GCCTTGAATCTCTCAGCACC	59.957	20	CGACGGATAGATGGCCTAAA	60.053	20	272	780701	780972	GGCCTTGAATCTCTCAGCAC	59.957	20	CGACGGATAGATGGCCTAAA	60.053	20	273	780700	780972	AGGCCTTGAATCTCTCAGCA	60.096	20	CGACGGATAGATGGCCTAAA	60.053	20	274	780699	780972
PT-782235-782240	TTCGTTACTGTACCCCGGTC	59.853	20	CCGGAATAGACGGTTTTGAA	59.931	20	188	782142	782329	TTCGTTACTGTACCCCGGTC	59.853	20	CGCATACCAACCATTCCTTT	59.823	20	298	782142	782439	TTCGTTACTGTACCCCGGTC	59.853	20	GTTCCCGGAATAGACGGTTT	60.187	20	192	782142	782333
PT-784155-784155	GTTCCTTCTCCTTTTTCGGG	60.046	20	AAAGATTAGGCGGAGGCATT	60.061	20	201	784119	784319	GTTCCTTCTCCTTTTTCGGG	60.046	20	TGAGAGGCTCTGATACGGCT	60.119	20	246	784119	784364	GTTCCTTCTCCTTTTTCGGG	60.046	20	GAGAGGCTCTGATACGGCTG	60.119	20	245	784119	784363
PT-786221-786222	CCCATCAATCATCCAACACA	60.177	20	GTAGTCGCCGTTTCTGGTGT	60.179	20	265	786141	786405	CCCATCAATCATCCAACACA	60.177	20	CGAGGAATTGCCCTATTGAG	59.662	20	210	786141	786350	TTTAAGCTCGTTTCAAGCCG	60.5	20	GTTTGTCGTTGGGGCTAAAA	59.975	20	245	786040	786284
PT-788468-788474	ATCAGCAGGCCCTTTCTTTT	60.208	20	TCATTGTGGGGAGGGTAAAG	59.784	20	298	788311	788608	ATCAGCAGGCCCTTTCTTTT	60.208	20	GGCCTTTCATTCCCTTGTTT	60.299	20	261	788311	788571	ATCAGCAGGCCCTTTCTTTT	60.208	20	GTGGGGAGGGTAAAGAGCAT	60.328	20	293	788311	788603
PT-790393-790394	CCCTGAACAAGAAGGAGCTG	59.982	20	ACGTAGTCCGTCGGTCAAAC	60.035	20	274	790298	790571	AGAAGGAGCTGCTCTCGATG	59.851	20	ACGTAGTCCGTCGGTCAAAC	60.035	20	265	790307	790571	GAAGGAGCTGCTCTCGATGT	59.709	20	ACGTAGTCCGTCGGTCAAAC	60.035	20	264	790308	790571
PT-791207-791213	GGCCAAGTTGCATAATCGTT	59.967	20	CCTAGTCGCTCGGACTCTTG	60.149	20	254	791038	791291	TCATCTTCTATCCTGCGCCT	59.939	20	CCTAGTCGCTCGGACTCTTG	60.149	20	287	791005	791291	GGCCAAGTTGCATAATCGTT	59.967	20	GTGAGCCTTGAAAGTACCCG	59.734	20	227	791038	791264
PT-792098-792098	CGATCTACGGGCATTCATCT	60.059	20	ACATTGACCTCTCGCAGACC	60.269	20	167	791981	792147	CTCGATCTACGGGCATTCAT	60.059	20	ACATTGACCTCTCGCAGACC	60.269	20	169	791979	792147	CTACGGGCATTCATCTCCAT	59.917	20	ACATTGACCTCTCGCAGACC	60.269	20	163	791985	792147
PT-793163-793174	ACGGTAAGCGGGTTCTTTCT	60.13	20	CGGCTCTTTACTCTGTTCGG	60.008	20	200	793093	793292	ACGGTAAGCGGGTTCTTTCT	60.13	20	CCGGCTCTTTACTCTGTTCG	60.008	20	201	793093	793293	ACGGTAAGCGGGTTCTTTCT	60.13	20	TGCCGGCTCTTTACTCTGTT	60.015	20	203	793093	793295
PT-793802-793807	GTAAGGGCGGTAGGCTTTTC	60.095	20	GTTTTCTGTCTACGAGCGCC	60.022	20	245	793615	793859	GTAAGGGCGGTAGGCTTTTC	60.095	20	AGCGCTTTTCGAAACAAGAA	60.131	20	300	793615	793914	GTAAGGGCGGTAGGCTTTTC	60.095	20	GCGCTTTTCGAAACAAGAAG	60.131	20	299	793615	793913
PT-794584-794584	CGTGCTAGTTCCGCTACTCC	60.037	20	CTCTTTTGAGGGCTTTCGTG	59.986	20	295	794416	794710	AGAGGGGCTCACTTGACAGA	59.986	20	GGCCTGGAACAAAAACTTCA	60.088	20	241	794378	794618	GAGGGGCTCACTTGACAGAG	59.986	20	GGCCTGGAACAAAAACTTCA	60.088	20	240	794379	794618
PT-794668-794668	CGTGCTAGTTCCGCTACTCC	60.037	20	CTCTTTTGAGGGCTTTCGTG	59.986	20	295	794416	794710	CTTTGGTAGCTTTGGGCAAG	59.876	20	CTCTTTTGAGGGCTTTCGTG	59.986	20	203	794508	794710	TCCGCTACTCCAGTTCCAGT	59.867	20	CTCTTTTGAGGGCTTTCGTG	59.986	20	286	794425	794710
PT-795740-795740	TAATTGCTGTTGTCGCCTTG	59.872	20	ATCTCTTTCTCGCAGCTCGT	59.337	20	260	795638	795897	TGTCCGCCGTTCTCTTATCT	59.836	20	ATCTCTTTCTCGCAGCTCGT	59.337	20	242	795656	795897	GTCCGCCGTTCTCTTATCTG	59.836	20	ATCTCTTTCTCGCAGCTCGT	59.337	20	241	795657	795897
PT-796052-796059	ATCGCCACTCTCGATTCAAC	60.226	20	GATCCAGGCTCAAGGCAATA	60.177	20	206	795918	796123	ATCGCCACTCTCGATTCAAC	60.226	20	TCCAGGCTCAAGGCAATAAC	60.214	20	204	795918	796121	TTGAAAGTCGGATCTTGCCT	59.813	20	TAGTCGATCCAGGCTCAAGG	60.353	20	169	795960	796128
PT-796256-796256	GTTATTGCCTTGAGCCTGGA	60.214	20	CTATGAGACGAATCGGCACC	60.624	20	276	796102	796377	TTATTGCCTTGAGCCTGGAT	59.668	20	CTATGAGACGAATCGGCACC	60.624	20	275	796103	796377	CCTTGAGCCTGGATCGACTA	60.353	20	CTATGAGACGAATCGGCACC	60.624	20	269	796109	796377
PT-796579-796579	AAGGCAAGCAGTAGCGGATA	60.003	20	CATGCAGCGTACCTCTCAAA	60.011	20	259	796512	796770	AAGGCAAGCAGTAGCGGATA	60.003	20	GATGATCGAGCGAGAGAAGG	60.057	20	203	796512	796714	AAGGCAAGCAGTAGCGGATA	60.003	20	GGATGATCGAGCGAGAGAAG	60.057	20	204	796512	796715
PT-796716-796721	AAGGCAAGCAGTAGCGGATA	60.003	20	CATGCAGCGTACCTCTCAAA	60.011	20	259	796512	796770	TAGTCCATCTACATCGGGGC	59.917	20	CATGCAGCGTACCTCTCAAA	60.011	20	210	796561	796770	AAGGCAAGCAGTAGCGGATA	60.003	20	AGGCTTGAATTGATCATGGG	59.894	20	285	796512	796796
PT-797375-797375	CAGCTGTCCACATTGCATCT	59.862	20	TAACACTCCCCCTCAAGCTG	60.246	20	228	797316	797543	ATAACCAGGCAGCTGTCCAC	60.142	20	TAACACTCCCCCTCAAGCTG	60.246	20	237	797307	797543	ATGCTGCAAGAACTTGGGAT	59.7	20	TAACACTCCCCCTCAAGCTG	60.246	20	289	797255	797543
PT-798016-798021	GGGGGATATGGATTTAGCGT	60.006	20	TTGCAACCAGACGTGCTAAC	59.911	20	272	797879	798150	GGGGGATATGGATTTAGCGT	60.006	20	GTTGCAACCAGACGTGCTAA	59.911	20	273	797879	798151	CTGCCTGCATCCTTAGCTTC	60.118	20	TTGCAACCAGACGTGCTAAC	59.911	20	217	797934	798150
PT-799135-799136	CACTTCGCTTTTAGCGTTCC	60.018	20	CCAGTTCCTATCCGCCTGTA	60.088	20	280	799002	799281	GTTGGCACTTCGCTTTTAGC	60.025	20	CCAGTTCCTATCCGCCTGTA	60.088	20	285	798997	799281	CACTTCGCTTTTAGCGTTCC	60.018	20	CGATTTGGGCAACTTTCACT	60.11	20	211	799002	799212
PT-799590-799596	CCCATAGCTTGGTGTGGTTT	59.853	20	AAAGGGAAGGGTAGTGGGTG	60.218	20	157	799468	799624	CCCATAGCTTGGTGTGGTTT	59.853	20	CACGTACGTAAAGGGAAGGG	59.489	20	166	799468	799633	GCCTTCTTGGAATAGCTGGA	59.41	20	AAAGGGAAGGGTAGTGGGTG	60.218	20	282	799343	799624
PT-799729-799729	AACCTACCCCACCCACTACC	59.972	20	CCCAAAGTTCTAGGAACGGA	59.167	20	294	799596	799889	AACCTACCCCACCCACTACC	59.972	20	CCCCAAAGTTCTAGGAACGG	60.836	20	295	799596	799890	CTACCCCACCCACTACCCTT	60.103	20	CCCAAAGTTCTAGGAACGGA	59.167	20	291	799599	799889
PT-800025-800031	GTTGGGCCGAACAACTTAAA	59.975	20	GTGTGCTTTTGGTAGCAGCA	60.058	20	214	799970	800183	GTTGGGCCGAACAACTTAAA	59.975	20	CTTTTGGTAGCAGCAGCCAT	60.407	20	209	799970	800178	GTTGGGCCGAACAACTTAAA	59.975	20	TAGCAGCAGCCATACCAACA	60.423	20	202	799970	800171
PT-800338-800344	GCTGCTCAAAACGGTCTTTC	60	20	AGTACTGAACAGGGCATGGG	59.989	20	189	800300	800488	TGCTGCTACCAAAAGCACAC	60.058	20	CTACTGCTGCTAAATCCGCC	60.003	20	229	800164	800392	ACTGCTGCTCAAAACGGTCT	60.058	20	AGTACTGAACAGGGCATGGG	59.989	20	192	800297	800488
PT-802463-802468	CACAGTTTTCGGGTTATCGG	60.357	20	AAGCCCGTCTCAATAGCTCA	59.978	20	223	802405	802627	CCACAGTTTTCGGGTTATCG	60.357	20	AAGCCCGTCTCAATAGCTCA	59.978	20	224	802404	802627	CACAGTTTTCGGGTTATCGG	60.357	20	TGTGCGTCGATTTAGCAAAC	59.879	20	255	802405	802659
PT-803325-803330	TGTGACATCAGTTCTTCCGC	59.837	20	CGGAATCGGAAGTCAGAAAG	59.807	20	281	803093	803373	GACATCAGTTCTTCCGCTCC	59.81	20	CGGAATCGGAAGTCAGAAAG	59.807	20	278	803096	803373	TTCTTTCGTTTCTTCGTCGG	60.357	20	GGCAGTCATCGTTTCCATCT	60.081	20	272	803279	803550
PT-803485-803490	CTTTCTGACTTCCGATTCCG	59.807	20	GGCAGTCATCGTTTCCATCT	60.081	20	197	803354	803550	CTTTCTGACTTCCGATTCCG	59.807	20	ATTTCGGCAGTCATCGTTTC	60.081	20	202	803354	803555	CTTTCTGACTTCCGATTCCG	59.807	20	GATTTCGGCAGTCATCGTTT	60.081	20	203	803354	803556
PT-803808-803813	AGAAGGAACCGAAGAAAGCC	59.827	20	GACTTCCCAAGAAACCGACA	60.088	20	190	803722	803911	GTTCCAGCGCTCTACGAAAG	60.154	20	ATTGCCCTGGAACTGTTCTG	60.111	20	168	803765	803932	AGAAGGAACCGAAGAAAGCC	59.827	20	ATTGCCCTGGAACTGTTCTG	60.111	20	211	803722	803932
PT-804186-804187	GCGGTGGTCGCATATTTAGT	59.988	20	GGGCTTTCCTTGCTTTCTCT	59.962	20	250	804097	804346	GCGGTGGTCGCATATTTAGT	59.988	20	ATCCGCCTTGTTGTGATAGG	59.955	20	272	804097	804368	GCGGTGGTCGCATATTTAGT	59.988	20	GCTTTCTCTGAAGAGGGGCT	60.096	20	239	804097	804335
PT-805329-805334	TGCCTGCTGACATCAAACTC	59.992	20	AAATAAAGGGCGAGGGAAGA	60.034	20	294	805298	805591	GCCTGCTGACATCAAACTCA	59.992	20	AAATAAAGGGCGAGGGAAGA	60.034	20	293	805299	805591	TGCCTGCTGACATCAAACTC	59.992	20	CTCGGAAGCAATGGGTTAAA	60.067	20	253	805298	805550
PT-805493-805498	TGCCTGCTGACATCAAACTC	59.992	20	AAATAAAGGGCGAGGGAAGA	60.034	20	294	805298	805591	GCCTGCTGACATCAAACTCA	59.992	20	AAATAAAGGGCGAGGGAAGA	60.034	20	293	805299	805591	TGCCTGCTGACATCAAACTC	59.992	20	CTCGGAAGCAATGGGTTAAA	60.067	20	253	805298	805550
PT-805834-805840	GAAGAATAGGCACATGCGGT	60.103	20	ATAATCCGGGAAAGATTCCG	60.109	20	264	805701	805964	AGAATAGGCACATGCGGTTC	60.103	20	ATAATCCGGGAAAGATTCCG	60.109	20	262	805703	805964	AGAATAGGCACATGCGGTTC	60.103	20	TACCACTTCCCGCTCTGTCT	59.867	20	232	805703	805934
PT-807931-807936	CTTCGAGTCCAACTTCAGCC	59.989	20	ATCCTAGCCCTATGCTCCGT	60.081	20	219	807741	807959	CTTCGAGTCCAACTTCAGCC	59.989	20	CTTGTCTCTTTCTTCGCGCT	59.898	20	255	807741	807995	GGTTGGTTCAGGAAAGGTGA	59.943	20	ATCCTAGCCCTATGCTCCGT	60.081	20	253	807707	807959
PT-808243-808248	ACTTTAGGACCTGGCTTCCC	59.576	20	AGGATAAATTCACATCGGCG	59.923	20	269	808080	808348	GCGGCGTCAAGGACATATAG	60.626	20	AGGATAAATTCACATCGGCG	59.923	20	289	808060	808348	ACTTTAGGACCTGGCTTCCC	59.576	20	AGTCAGTTTGTTCTTCGCGG	60.431	20	297	808080	808376
PT-811043-811043	TAGTGGTGGCCACGTCTCTT	60.711	20	CTTTTGGTGCCTACTCTCGC	60.015	20	184	810963	811146	TAGTGGTGGCCACGTCTCTT	60.711	20	GCTTTTGGTGCCTACTCTCG	60.015	20	185	810963	811147	TAGTGGTGGCCACGTCTCTT	60.711	20	GGTGCCTACTCTCGCAGAAC	60.02	20	179	810963	811141
PT-811728-811733	TATCCATGCCAGTAGGGAGG	59.91	20	TGATGAGGAAGGATCCCAAG	60.003	20	235	811574	811808	TATCCATGCCAGTAGGGAGG	59.91	20	CTTGATGAGGAAGGATCCCA	60.003	20	237	811574	811810	TATCCATGCCAGTAGGGAGG	59.91	20	CGAAGCTATGCATGAGTGGA	59.972	20	265	811574	811838
PT-812476-812476	TCGTTGGACGATTCCAAACT	60.495	20	TCCCAAAGGATCTGGATCTG	60.003	20	196	812380	812575	CGTTGGACGATTCCAAACTC	60.495	20	TCCCAAAGGATCTGGATCTG	60.003	20	195	812381	812575	CGTTGGACGATTCCAAACTC	60.495	20	GCCGACAAACTAATTCCCAA	59.938	20	209	812381	812589
PT-812765-812770	CAGGCTCTAACATCCGAAGC	59.978	20	GATTCCTCCCCACTCCTAGC	60.037	20	209	812690	812898	GCAGGCTCTAACATCCGAAG	59.978	20	GATTCCTCCCCACTCCTAGC	60.037	20	210	812689	812898	GCTCTAACATCCGAAGCCAG	59.978	20	GATTCCTCCCCACTCCTAGC	60.037	20	206	812693	812898
PT-814399-814404	ATTTCTTTCATTTGGCGGTG	59.938	20	AAGGGTGTCTGCTCAATGCT	59.874	20	155	814318	814472	CATTTCTTTCATTTGGCGGT	59.938	20	AAGGGTGTCTGCTCAATGCT	59.874	20	156	814317	814472	AGCCGGATTTCCATTTCTTT	59.909	20	AAGGGTGTCTGCTCAATGCT	59.874	20	167	814306	814472
PT-817023-817023	CACTTATTTCGTTTCGGGGA	59.931	20	GACTATAAGGGGCTGGAGGC	60.06	20	218	816829	817046	TCACTTATTTCGTTTCGGGG	59.931	20	GACTATAAGGGGCTGGAGGC	60.06	20	219	816828	817046	TCACTTATTTCGTTTCGGGG	59.931	20	GGCACCTGCCAACTGACTAT	60.142	20	233	816828	817060
PT-818246-818246	CCTCTTCCAGATCCCCATTT	60.264	20	GAGACTTTCAGCCCTGTTGC	59.997	20	203	818191	818393	CTCCTCTTCCAGATCCCCAT	60.412	20	GAGACTTTCAGCCCTGTTGC	59.997	20	205	818189	818393	ATCTCCTCTTCCAGATCCCC	59.449	20	GAGACTTTCAGCCCTGTTGC	59.997	20	207	818187	818393
PT-818477-818477	GCAACAGGGCTGAAAGTCTC	59.997	20	CCAAGCCCCTTGACTCATAA	60.066	20	294	818374	818667	GCAACAGGGCTGAAAGTCTC	59.997	20	AATCTCCAAGCCCCTTGACT	60.074	20	299	818374	818672	GCAACAGGGCTGAAAGTCTC	59.997	20	AATGAAGGGAACAAGCAACG	60.11	20	276	818374	818649
PT-820588-820594	TAGTGCCCACGGGACTTTAC	59.993	20	AGAGGTTCACCTCCTGCAAA	59.844	20	150	820468	820617	TAGTGCCCACGGGACTTTAC	59.993	20	AAGAGGTTCACCTCCTGCAA	59.844	20	151	820468	820618	AGGCCCTCATCTCTTCCATT	60.037	20	CAGCAGTTGCAAAAGCAAAG	59.792	20	163	820532	820694
PT-820879-820884	GATCGAGAGCCCATTGTTGT	60.081	20	GAGACAAAGGCTTCAGCACC	59.997	20	232	820829	821060	GATCGAGAGCCCATTGTTGT	60.081	20	CCGAGTTTCAGAAGCACTCC	59.989	20	191	820829	821019	AGATCGAGAGCCCATTGTTG	60.218	20	GAGACAAAGGCTTCAGCACC	59.997	20	233	820828	821060
PT-821467-821467	ATCGAACCGAACACCTGTCT	59.579	20	TTCGTAACGTAAACAGCCCC	59.996	20	214	821442	821655	GGTCGCTATCGCCTTAGTTG	59.867	20	GCGCTTTCGACGTTAGACTT	59.66	20	269	821236	821504	GATCGAACCGAACACCTGTC	60.52	20	TTCGTAACGTAAACAGCCCC	59.996	20	215	821441	821655
PT-826994-826995	CAGCTTGGAGCATTTCACAA	59.988	20	AACTTGATCTGGTGGTTCGG	59.966	20	267	826937	827203	CAGCTTGGAGCATTTCACAA	59.988	20	ATCTGGTGGTTCGGAGATTG	59.927	20	261	826937	827197	AATCTTTCATCCTTGGGCCT	59.903	20	AACTTGATCTGGTGGTTCGG	59.966	20	244	826960	827203
PT-829600-829600	GGGGATACCTTTGACCGATT	60.017	20	TGTTCCTCCTTTCGTGGTTC	60.088	20	226	829473	829698	GGGGATACCTTTGACCGATT	60.017	20	ATCCGCTTGACATCATTTCC	59.9	20	270	829473	829742	GATTGCTTGCCCCTTCATTA	60.038	20	TGTTCCTCCTTTCGTGGTTC	60.088	20	210	829489	829698
PT-832742-832747	TGTGTTCATGTTGGCGATTT	59.972	20	GAGCGGGGCCTTACTTATTC	60.061	20	172	832611	832782	TTGTGTTCATGTTGGCGATT	59.972	20	GAGCGGGGCCTTACTTATTC	60.061	20	173	832610	832782	TTTGTGTTCATGTTGGCGAT	59.972	20	GAGCGGGGCCTTACTTATTC	60.061	20	174	832609	832782
PT-832979-832979	ATCATAAAGCCCCCTGATCC	60.117	20	CCGTACCGACGCCTTACTAC	59.654	20	295	832719	833013	AAAAGAAAGGGAGGCTGAGG	59.821	20	GCGTAGTCTCGGTCCACAGT	60.329	20	258	832893	833150	GCGAAGGCCTATGCTACAGT	59.504	20	GCACCTGAGCCTCGTTAGAC	60.02	20	293	832828	833120
PT-834293-834300	AATAGATAGGGCGGAGCCAG	60.562	20	TCGAAGAGCTTTCTTCGCAT	60.235	20	281	834210	834490	GCGCCCCTTATTGAAAACTA	59.212	20	TCGAAGAGCTTTCTTCGCAT	60.235	20	242	834249	834490	AATAGATAGGGCGGAGCCAG	60.562	20	AGAGCTTTCTTCGCATGCTT	59.364	20	277	834210	834486
PT-834567-834573	CGCGTTAGCGCTTTAGTTTG	61.041	20	TATAGGGTTCCAAACCTGCG	59.953	20	264	834345	834608	GCTCAAGCATGCGAAGAAAG	61.188	20	TAGTAGACAGCGAGCGAGCA	60.058	20	282	834463	834744	CTCAAGCATGCGAAGAAAGC	61.188	20	TAGTAGACAGCGAGCGAGCA	60.058	20	281	834464	834744
PT-835495-835501	CCCGAGTAGTTTACCGGACA	59.986	20	CTTTTCTTGACTTGGCCTGC	59.993	20	248	835363	835610	GGAGCCCCGAGTAGTTTACC	59.962	20	CTTTTCTTGACTTGGCCTGC	59.993	20	253	835358	835610	GGGAGCCCCGAGTAGTTTAC	59.962	20	CTTTTCTTGACTTGGCCTGC	59.993	20	254	835357	835610
PT-835676-835681	GCAGGCCAAGTCAAGAAAAG	59.993	20	AAAATCGATCTCGCCATCAG	60.177	20	177	835591	835767	GAGAGACCTCCACAAGGCAG	59.986	20	AAAATCGATCTCGCCATCAG	60.177	20	294	835474	835767	GCAGGCCAAGTCAAGAAAAG	59.993	20	CGAGAAGGTATTAGCCACCG	59.724	20	264	835591	835854
PT-835823-835828	GCAGGCCAAGTCAAGAAAAG	59.993	20	CGAGAAGGTATTAGCCACCG	59.724	20	264	835591	835854	CAGGCCAAGTCAAGAAAAGG	59.846	20	CGAGAAGGTATTAGCCACCG	59.724	20	263	835592	835854	TTGAAGCCTTAAGAAAGCGG	59.603	20	CGAGAAGGTATTAGCCACCG	59.724	20	200	835655	835854
PT-836872-836877	TTCAAAGTCGTGTTGAAGCG	60.027	20	TGAACTACGTGGGAGGAACC	59.966	20	248	836845	837092	TTCAAAGTCGTGTTGAAGCG	60.027	20	ACGGACTCTAAGGAACGGCT	60.268	20	179	836845	837023	TTGAAAAGGACGAGAGGACG	60.366	20	TGAACTACGTGGGAGGAACC	59.966	20	282	836811	837092
PT-837398-837398	CACTACGAAAGGTGTCCCGT	60.028	20	TGGATGCTCTCTCCTTGCTT	60.096	20	254	837221	837474	ACTACGAAAGGTGTCCCGTG	60.028	20	TGGATGCTCTCTCCTTGCTT	60.096	20	253	837222	837474	GCTAACGCACCCCTTATTGA	60.096	20	GACAAACAGGCCAGGAAAGA	60.232	20	185	837352	837536
PT-838612-838612	CCTAAAGTCTGCTCCGTTCG	60.008	20	TCTTTCTTGTTGTCGGGGAG	60.224	20	290	838374	838663	CCTAAAGTCTGCTCCGTTCG	60.008	20	CTCTTTCTTGTTGTCGGGGA	60.224	20	291	838374	838664	GTTGTACGGCTTCTGGGAAA	60.11	20	GCAGCTCCGAAATACAGGTC	59.843	20	221	838532	838752
PT-839228-839234	ATGGTAGAGGCGCTTGAGAA	59.978	20	TCATCCCAAAATAAGCTGGC	60.038	20	291	839164	839454	ATGGTAGAGGCGCTTGAGAA	59.978	20	GAAGTGCTTCTTTGCTCGCT	59.904	20	202	839164	839365	ATGGTAGAGGCGCTTGAGAA	59.978	20	AGAAGTGCTTCTTTGCTCGC	59.904	20	203	839164	839366
PT-840443-840444	GAGAGCATCTGAAGGGTTGC	59.957	20	ACAGGAATCCCTAAATCCCG	60.145	20	285	840206	840490	GGAGAGCATCTGAAGGGTTG	59.803	20	ACAGGAATCCCTAAATCCCG	60.145	20	286	840205	840490	GAAGGGTTGCTTCACCAAAG	59.711	20	ACAGGAATCCCTAAATCCCG	60.145	20	275	840216	840490
PT-840862-840869	GAGGCTTCCCCCTTGTAAAT	59.42	20	ACCGCTTACAGCACCTTCAT	59.763	20	270	840834	841103	GAGGCTTCCCCCTTGTAAAT	59.42	20	CCGCTTACAGCACCTTCATT	60.27	20	269	840834	841102	AGGAGCGGACTGAGTCGATA	59.973	20	CGTCTTGCTACTTCGGAACTG	60.06	21	298	840781	841078
PT-841126-841132	ATGAAGGTGCTGTAAGCGGT	59.763	20	TACCGCTTTTTCATTCCCAC	59.938	20	283	841084	841366	ATGAAGGTGCTGTAAGCGGT	59.763	20	GTACCGCTTTTTCATTCCCA	59.938	20	284	841084	841367	AATGAAGGTGCTGTAAGCGG	60.27	20	TACCGCTTTTTCATTCCCAC	59.938	20	284	841083	841366
PT-841650-841650	AGCCTTTCACCTGGCTAACA	59.875	20	ATAGAGAATCAGGCTCGGCA	59.939	20	289	841552	841840	AGCCTTTCACCTGGCTAACA	59.875	20	CATAGAGAATCAGGCTCGGC	59.939	20	290	841552	841841	AGCCTTTCACCTGGCTAACA	59.875	20	TTGATAGAGAATGCTCCCCG	60.17	20	230	841552	841781
PT-851360-851364	TCCAAGGGATCGAGTGATTC	60.011	20	TACCGAGCCTTTTGTGCTCT	60.015	20	260	851254	851513	TCCAAGGGATCGAGTGATTC	60.011	20	ACCGAGCCTTTTGTGCTCTA	60.015	20	259	851254	851512	GAATCTTCCCCTTTGCATGA	60.014	20	TACCGAGCCTTTTGTGCTCT	60.015	20	187	851327	851513
PT-855937-855942	CCAGACAGCTTCACACCTGA	60.022	20	GACCAATGGTAGGGAAGGGT	60.052	20	215	855813	856027	TACGAGGGATGTTTCCAAGC	60.074	20	CTAGCAGGGGATTTCCATGA	60.029	20	276	855905	856180	AGGGATGTTTCCAAGCACAG	60.111	20	CTAGCAGGGGATTTCCATGA	60.029	20	272	855909	856180
PT-856222-856222	AGCATCGATGGGTACTGGTC	59.957	20	TTCTCTGGCCGGAGCTATTA	59.938	20	299	856179	856477	AGCATCGATGGGTACTGGTC	59.957	20	TGAAAGCCAAAGGAAAAGGA	59.795	20	201	856179	856379	AGCATCGATGGGTACTGGTC	59.957	20	CCCGCAATCAATCCATCTAC	60.296	20	156	856179	856334
PT-856931-856937	AGCCTGCTATGCATCCTTGT	59.866	20	CATTGAAAGCCCAGGGAATA	59.894	20	164	856827	856990	GGAACCCTTCAACGGAAAAT	60.166	20	CATTGAAAGCCCAGGGAATA	59.894	20	255	856736	856990	TGCTATGCATCCTTGTTCCA	60.22	20	CATTGAAAGCCCAGGGAATA	59.894	20	160	856831	856990
PT-876145-876151	GCCAGTCGAGCCAGATAAAG	59.978	20	TGCGGACATGGTTGGTACT	59.976	19	267	876020	876286	CTGAGGCTGGAACGAAGAAG	60.126	20	TGCGGACATGGTTGGTACT	59.976	19	294	875993	876286	AGAACTTCTGCCAGTCGAGC	59.751	20	TGCGGACATGGTTGGTACT	59.976	19	276	876011	876286
PT-876636-876642	TTGCAATCCTGAATTAGCCC	60.038	20	AAGTTAACACGGATGGCAGC	60.14	20	283	876440	876722	TATTTGCTGAGCCCACATTG	59.688	20	TTTGGGCTAACAGGAACAGG	60.103	20	287	876603	876889	TATTTGCTGAGCCCACATTG	59.688	20	CCTTTGGGCTAACAGGAACA	60.103	20	289	876603	876891
PT-878834-878834	AGGTTCAGGGTTTCCGTTCT	59.972	20	AAACACCAACAGACATGGCA	60.008	20	204	878748	878951	TTGTAGGTTCAGGGTTTCCG	59.964	20	AAACACCAACAGACATGGCA	60.008	20	208	878744	878951	TTGTAGGTTCAGGGTTTCCG	59.964	20	GAGTACGACGGCGAAGAAAG	60.015	20	263	878744	879006
PT-879050-879056	TGCCATGTCTGTTGGTGTTT	60.008	20	TCCAATATTCAAAGCCTCCG	60.031	20	275	878932	879206	CTTTCTTCGCCGTCGTACTC	60.015	20	TCCAATATTCAAAGCCTCCG	60.031	20	220	878987	879206	TGCCATGTCTGTTGGTGTTT	60.008	20	ATATTCAAAGCCTCCGGGAC	60.286	20	271	878932	879202
PT-880628-880633	TATCCTGTGAGGCGAGTCCT	59.827	20	TCTCTATCGCCCCTTCCTTT	60.166	20	201	880479	880679	TATCCTGTGAGGCGAGTCCT	59.827	20	TTCTCTATCGCCCCTTCCTT	60.166	20	202	880479	880680	TGAGGCTCGTTCCTGAACTT	59.989	20	TTCCCAACGAACTTCTCGAT	59.67	20	300	880553	880852
PT-883566-883566	CGGGAAGCCAAGTGTCTTAG	59.869	20	CGGACTCGCTCCTTACTGAC	60.012	20	182	883423	883604	CGGGAAGCCAAGTGTCTTAG	59.869	20	AACTCCTTAATGCCCGGACT	59.962	20	196	883423	883618	CGGGAAGCCAAGTGTCTTAG	59.869	20	TACCAACTCCTTAATGCCCG	59.953	20	200	883423	883622
PT-885198-885198	GGAGCAGGAAACAGAAGCAC	59.997	20	TTTTCGGGGACTAGCCCTAT	59.924	20	253	885054	885306	GGAGCAGGAAACAGAAGCAC	59.997	20	AAGAAAACCCCAACGAAACC	60.2	20	284	885054	885337	GGAGCAGGAAACAGAAGCAC	59.997	20	CCTTATTGGGGCTTAGCCTT	59.588	20	208	885054	885261
PT-888930-888930	CTGACCCCAGAAGTTGGGTA	59.959	20	GAGCCAACTGCTTTCTTTGG	59.993	20	244	888783	889026	TCAATGGTCCGCTCTTCTCT	59.95	20	GAGCCAACTGCTTTCTTTGG	59.993	20	278	888749	889026	CAATGGTCCGCTCTTCTCTC	59.95	20	GAGCCAACTGCTTTCTTTGG	59.993	20	277	888750	889026
PT-889339-889344	ATTTAGTGGACGGTTTTGCG	59.996	20	ACCTAGCGCCTACAGACTGC	59.668	20	270	889110	889379	GTTCCTGTAAGCCAAGCAGC	60.022	20	ACCTAGCGCCTACAGACTGC	59.668	20	187	889193	889379	ATCGTCGTTTGGCGTTTTAG	60.131	20	ACCTAGCGCCTACAGACTGC	59.668	20	241	889139	889379
PT-889661-889661	GGTTGGGGAAGCTAGGAAAG	60.068	20	ACTCTTAGACGCAAGGCTGC	59.786	20	179	889594	889772	CTAGCTGGTTGGGGAAGCTA	59.471	20	TCTCTTCTCCTGCCTTGCTC	59.827	20	241	889588	889828	CTAGCTGGTTGGGGAAGCTA	59.471	20	ACTCTTAGACGCAAGGCTGC	59.786	20	185	889588	889772
PT-891519-891519	CCCTGTGAAAGCCATCTCAT	60.073	20	TCATGTGGCCCTCTTACTCC	60.073	20	277	891341	891617	GGTGATTACGTCCTGGGAAA	59.79	20	TCATGTGGCCCTCTTACTCC	60.073	20	256	891362	891617	TCCTGGGAAAACGAGAGAAA	59.784	20	TCATGTGGCCCTCTTACTCC	60.073	20	246	891372	891617
PT-893654-893660	TCAACGACACAAGCAAGGAG	60.025	20	CATAGTACGGCCGCTCATCT	60.257	20	300	893572	893871	GTTGACAAAGGAGAGCAGCC	59.997	20	ACCATAGCCGGAAGGGATAG	60.299	20	220	893591	893810	GTTGACAAAGGAGAGCAGCC	59.997	20	CCATAGCCGGAAGGGATAGT	60.299	20	219	893591	893809
PT-893937-893937	ACGCGCTACACACAAGAATG	59.935	20	TGATCCGTTCAGATTCCACA	60.048	20	277	893894	894170	CACGCGCTACACACAAGAAT	59.935	20	TGATCCGTTCAGATTCCACA	60.048	20	278	893893	894170	ACGCGCTACACACAAGAATG	59.935	20	GCCTGTTTTGGACGGTAGAA	60.11	20	200	893894	894093
PT-897604-897610	GGCAGACATCCCAGCATTAT	59.923	20	TCAGGGTATTGCTGCTCCTC	60.362	20	291	897344	897634	TTTTGCTTCAAGGGGTCATT	59.546	20	TCAAAGGAATGGGGACTCAG	60.042	20	188	897489	897676	TTTTGCTTCAAGGGGTCATT	59.546	20	CAAAGGAATGGGGACTCAGA	60.042	20	187	897489	897675
PT-902049-902054	TGATTAGATCTCCTTGGCCG	60.17	20	CGAACCAAAGGTTGACCAGT	60.005	20	210	901981	902190	CAGAAAGAGCCTTGTGGGTC	59.844	20	TGTTGCAGAATTTTACCCCC	59.801	20	300	901862	902161	TGATTAGATCTCCTTGGCCG	60.17	20	TGTTGCAGAATTTTACCCCC	59.801	20	181	901981	902161
PT-902149-902149	TGATTAGATCTCCTTGGCCG	60.17	20	CGAACCAAAGGTTGACCAGT	60.005	20	210	901981	902190	GGTCCGCTTGACTCAAAAAG	59.853	20	CAGCTTGAAGAGCGGCTATC	60.257	20	267	902047	902313	GGTCCGCTTGACTCAAAAAG	59.853	20	ATCAGCTTGAAGAGCGGCTA	60.257	20	269	902047	902315
PT-908288-908288	TTGCCTCTCTTGAGCCAAAT	59.955	20	CTTGGTCAAGCGCTTTCTTC	60.132	20	294	908046	908339	GCTTTCCTACCCTGCCTACC	60.096	20	CTTGGTCAAGCGCTTTCTTC	60.132	20	257	908083	908339	TTGCTTTCCTACCCTGCCTA	59.839	20	CTTGGTCAAGCGCTTTCTTC	60.132	20	259	908081	908339
PT-908642-908647	GGATCCCAAAACTACCGGAT	60.017	20	AAAGGCCCTGCAATCTTTCT	60.208	20	231	908458	908688	ACCAGTCAGTTTGACCAGGC	60.159	20	ACCCCGCTAACTCCTCTTGT	60.132	20	283	908539	908821	ACCAGTCAGTTTGACCAGGC	60.159	20	TATGCTGCAAATGAATCCGA	60.179	20	220	908539	908758
PT-909436-909436	CAATTCCTTGCTTGGTGGAT	59.933	20	GAAGAATCTTTGGCGCGTAG	59.982	20	210	909317	909526	CAATTCCTTGCTTGGTGGAT	59.933	20	AAGAATCTTTGGCGCGTAGA	59.982	20	209	909317	909525	AAGCTGCTAGGCCTTATCCC	59.841	20	GAAGAATCTTTGGCGCGTAG	59.982	20	289	909238	909526
PT-909968-909972	AATCGATGAACCTCGGTCAG	60.073	20	GGTGGTTGAGGACCAAAAAC	59.284	20	152	909844	909995	AATCGATGAACCTCGGTCAG	60.073	20	ATTGTTTGAGAGCCGAATCC	59.129	20	257	909844	910100	AATCGATGAACCTCGGTCAG	60.073	20	CGGGCTGAGCAGTAAATGAG	60.924	20	238	909844	910081
PT-911244-911244	CAATTATGAGTTGGGCGCTT	60.096	20	CCGGTTCTGATCCTCATTGT	59.927	20	217	911216	911432	CAATTATGAGTTGGGCGCTT	60.096	20	CCTAACCTTCCGAGAGCCTT	59.842	20	278	911216	911493	GCAGGAATCGAACCTACGAA	60.214	20	CCGGTTCTGATCCTCATTGT	59.927	20	242	911191	911432
PT-912476-912476	CCGATCATGCTTGTTAGGGT	59.955	20	AATCGTAGCAAAGCGCAGAT	60.01	20	277	912410	912686	CCGATCATGCTTGTTAGGGT	59.955	20	CTGTCAAGTTCCGCTCTTCC	59.989	20	209	912410	912618	CCGATCATGCTTGTTAGGGT	59.955	20	CCTGTCAAGTTCCGCTCTTC	59.989	20	210	912410	912619
PT-915456-915456	TGGTCCTTTTGCTTGTGAAA	59.293	20	CGAACAAGAATGGTGACGAA	59.691	20	272	915271	915542	TTGGTCCTTTTGCTTGTGAA	59.293	20	CGAACAAGAATGGTGACGAA	59.691	20	273	915270	915542	TGTCCGCATTCTTAGCAATC	58.872	20	GGCTATTGCAGATTTTGGGA	60.038	20	282	915349	915630
PT-915746-915746	CCACTTCCAGCGATTCTAGC	59.978	20	AGGAAAGACGCTGACCAGAA	59.989	20	160	915669	915828	TCCCAAAATCTGCAATAGCC	60.038	20	AGGAAAGACGCTGACCAGAA	59.989	20	218	915611	915828	AAAATCTGCAATAGCCGGTG	60.096	20	AGGAAAGACGCTGACCAGAA	59.989	20	214	915615	915828
PT-917791-917797	AGTCCCCCTATGTGGGGTAG	60.067	20	TATGTTCCGCATTCAAACGA	60.073	20	251	917763	918013	AGTCCCCCTATGTGGGGTAG	60.067	20	CGGAACCATTGAACCCTAGA	59.926	20	201	917763	917963	AGTCCCCCTATGTGGGGTAG	60.067	20	CTCGGAACCATTGAACCCTA	59.926	20	203	917763	917965
PT-919721-919727	AATGAACGGGAAGGGCTACT	59.962	20	CTTAAAGTCCGGCTGTCCTG	59.869	20	226	919648	919873	AATGAACGGGAAGGGCTACT	59.962	20	TTACCACTAACAGGACCCCG	59.846	20	165	919648	919812	AATGAACGGGAAGGGCTACT	59.962	20	GGATGGCCTTGATCTTGCTA	60.177	20	256	919648	919903
PT-921681-921687	AGAGGGAACCGTAGCCAAGT	60.132	20	TGCACAAGAAGTCTGTTCCG	60.025	20	217	921578	921794	TCCGGCATCTCTTATTCCTG	60.17	20	TGCACAAGAAGTCTGTTCCG	60.025	20	288	921507	921794	AAGCATTCCGGCATCTCTTA	59.807	20	TGCACAAGAAGTCTGTTCCG	60.025	20	294	921501	921794
PT-922310-922310	AGCCCGAAATTCCAGTTTTT	59.945	20	AACCCACTAGCATGGGCATA	60.352	20	220	922163	922382	AGCCCGAAATTCCAGTTTTT	59.945	20	GCTGGAAGAACCCACTAGCA	60.397	20	228	922163	922390	AGCCCGAAATTCCAGTTTTT	59.945	20	TGCTGGAAGAACCCACTAGC	60.397	20	229	922163	922391
PT-924987-924987	TAGCGATTGTTGAATCAGCG	59.976	20	GCTTCGCACCTTTTGTCTTC	60	20	300	924866	925165	TCTCGATGCGAAAGATGTTG	59.948	20	GCTTCGCACCTTTTGTCTTC	60	20	259	924907	925165	GCGTTCTCATCCAGGAAAAA	60.192	20	GCTTCGCACCTTTTGTCTTC	60	20	206	924960	925165
PT-925561-925561	CCAGTTCTTTCTTTGAGCCG	59.986	20	ACCCACCTACGTTCGTCAAG	60.028	20	215	925417	925631	AGTTCGCTCAGTGACCCAGT	59.907	20	ACCCACCTACGTTCGTCAAG	60.028	20	230	925402	925631	GATAGGGTTGATGCCAGGAA	59.894	20	CGTTCCCATCTGTTTCCCTA	59.926	20	239	925538	925776
PT-927325-927325	CAGGCGGGAGGATTACATTA	59.916	20	CCGCAACTTGGTACTCCATT	59.993	20	248	927115	927362	GAGGAGCATCCGTTCTTTTG	59.813	20	CCGCAACTTGGTACTCCATT	59.993	20	200	927163	927362	AGGAGCATCCGTTCTTTTGA	59.813	20	CCGCAACTTGGTACTCCATT	59.993	20	199	927164	927362
PT-930275-930280	CTCAACCCGTGGTTCTCCTA	60.103	20	TTCATCATTGAGGGAGGGAG	60.003	20	245	930116	930360	GGTTTGATCATGCCCTTTGT	59.797	20	TTCATCATTGAGGGAGGGAG	60.003	20	266	930095	930360	CTCAACCCGTGGTTCTCCTA	60.103	20	CATTCATCATTGAGGGAGGG	60.272	20	247	930116	930362
PT-931879-931879	CCTTACGTTTTTCAGCAGGC	59.883	20	GCGAGCCAAAGACTTGAAAC	60	20	282	931816	932097	GCCCTTACGTTTTTCAGCAG	59.883	20	GCGAGCCAAAGACTTGAAAC	60	20	284	931814	932097	GCCCTTACGTTTTTCAGCAG	59.883	20	AGCGAGCCAAAGACTTGAAA	60.132	20	285	931814	932098
PT-933611-933612	GTCGCATAGCAAGCGATGTA	60.006	20	GCTACTACCAAGCCCACTGC	59.904	20	215	933571	933785	GTCGCATAGCAAGCGATGTA	60.006	20	TCGGGTACCACAGTGAGACA	60.154	20	277	933571	933847	GTCGCATAGCAAGCGATGTA	60.006	20	GAGACAGTGATCCCTACGCC	59.685	20	263	933571	933833
PT-935206-935212	GACATTCGATTTCGTTCCGT	59.939	20	TGGTTGCTCTATTGTGCTCG	60.011	20	245	935018	935262	ACATTCGATTTCGTTCCGTC	59.939	20	TGGTTGCTCTATTGTGCTCG	60.011	20	244	935019	935262	GGCGATCCTCGTTATCATGT	59.923	20	TGGTTGCTCTATTGTGCTCG	60.011	20	224	935039	935262
PT-936497-936503	ATAACGTCCGTCCCATGAAG	59.813	20	AGGAAAAGACAGACGGCAGA	59.989	20	216	936369	936584	ATAACGTCCGTCCCATGAAG	59.813	20	GAAAGCAATCCTTCCAACCA	60.051	20	198	936369	936566	GTCGGGTGTCTTGGTATTGG	60.232	20	AGGAAAAGACAGACGGCAGA	59.989	20	295	936290	936584
PT-938777-938785	GAAAGGCATTCCAGCTTCAG	59.955	20	AAGCCCTTTCCAGATGGAGT	60.074	20	187	938668	938854	AACTTTTCGATTCCTCGGGT	59.94	20	AAGCCCTTTCCAGATGGAGT	60.074	20	218	938637	938854	CCTACTCGAAGCACTCCACC	59.867	20	GCAGTTCAAGGGCACTCTTC	59.997	20	276	938740	939015
PT-939715-939725	TCGACGATCTACTGCTCCCT	59.973	20	GGCTGCTCAAGAAGTTGGAC	59.997	20	228	939603	939830	CGACGATCTACTGCTCCCTC	59.973	20	GGCTGCTCAAGAAGTTGGAC	59.997	20	227	939604	939830	AGATGCCCATGCTTTGATTC	60.043	20	GGCTGCTCAAGAAGTTGGAC	59.997	20	199	939632	939830
PT-939964-939964	TACACCGGTTAATGATGCGA	59.953	20	CTGCAAATGATGGGAATCCT	59.894	20	292	939930	940221	TACACCGGTTAATGATGCGA	59.953	20	TGTTCGTCAACGATGAAAGC	59.847	20	220	939930	940149	TACACCGGTTAATGATGCGA	59.953	20	GCCGCTGAACTTAAGACTCG	60.154	20	202	939930	940131
PT-941337-941342	GCAGATTTTGACCGGATTGT	59.939	20	CAAAACACGTGCATCCAAAC	60.011	20	190	941189	941378	GCAGATTTTGACCGGATTGT	59.939	20	ACAAAACACGTGCATCCAAA	60.011	20	191	941189	941379	GCAGATTTTGACCGGATTGT	59.939	20	AAAACACGTGCATCCAAACA	60.011	20	189	941189	941377
PT-942826-942831	GTTTGGAACCCAGTGCAAGT	60.012	20	TAAAAATCGGCGGATCACTC	60.038	20	221	942746	942966	GTTTGGAACCCAGTGCAAGT	60.012	20	GATGATCTCGGCTTGTCCAT	60.042	20	240	942746	942985	GTTTGGAACCCAGTGCAAGT	60.012	20	AAGCGTAAGCAATGTCTGGG	60.27	20	188	942746	942933
PT-942948-942953	GTTTGGAACCCAGTGCAAGT	60.012	20	GATGATCTCGGCTTGTCCAT	60.042	20	240	942746	942985	GTTTGGAACCCAGTGCAAGT	60.012	20	GAATCAACCTCTTCCCGGAT	60.272	20	294	942746	943039	GTTTGGAACCCAGTGCAAGT	60.012	20	TATCGCAGAATCCGAAAAGC	60.31	20	273	942746	943018
PT-943177-943182	GAGTGATCCGCCGATTTTTA	60.038	20	CACGAGCAAATCAATGTTCG	60.257	20	290	942947	943236	GAGTGATCCGCCGATTTTTA	60.038	20	AGTCCTGTCCACGAGCAAAT	59.727	20	299	942947	943245	TGATTGGACTTCGAACATCG	59.648	20	GAGTTAATGCGAAAGCAGGC	59.988	20	283	943111	943393
PT-943397-943402	GCCTGCTTTCGCATTAACTC	59.988	20	CCGCTTAGCAAACTCCAAAG	60.011	20	222	943374	943595	GCCTGCTTTCGCATTAACTC	59.988	20	CGAAGAACCGCTTAGCAAAC	60.018	20	229	943374	943602	GCCTGCTTTCGCATTAACTC	59.988	20	GTTGCGACATTAGCTCGTGA	60.019	20	154	943374	943527
PT-945974-945980	GTAACCGGCTTTGGTGAAAA	59.975	20	CAGAAGAGGCCAAGTGGAAG	59.982	20	289	945949	946237	TAACCGGCTTTGGTGAAAAC	59.975	20	CAGAAGAGGCCAAGTGGAAG	59.982	20	288	945950	946237	ATCGGGACGCATTACGATAG	59.945	20	CGAAATCGGTTCCACTTCAT	59.933	20	167	945842	946008
PT-948947-948952	GGAATCTGTCAATCGGAGGA	60.011	20	TATGCTGGATGGGATTGGAT	60.118	20	266	948915	949180	GGAATCTGTCAATCGGAGGA	60.011	20	TGAGTGAACTCTACCCGCCT	59.867	20	285	948915	949199	CCCCTCATTCAAAACCTCAA	59.903	20	TGGAAGACATTGAGAAGGGC	60.195	20	244	948755	948998
PT-949276-949281	CGCTATCTGCCTTGTTGTGA	60.011	20	CTCCCCAGGATCTCATTCAA	60.003	20	165	949250	949414	TGCTCACCTTTCCGCTATCT	59.978	20	CTCCCCAGGATCTCATTCAA	60.003	20	177	949238	949414	CTCACCTTTCCGCTATCTGC	59.978	20	CTCCCCAGGATCTCATTCAA	60.003	20	175	949240	949414
PT-950590-950590	CTTCGTTCGGGTTTGATTGT	59.971	20	TGCCGTTTTTATTCTTTGGC	60.075	20	228	950451	950678	CTTCGTTCGGGTTTGATTGT	59.971	20	GCCGTTTTTATTCTTTGGCA	60.075	20	227	950451	950677	CTTCGTTCGGGTTTGATTGT	59.971	20	CTTTGGCACAACTCGATGAA	59.84	20	215	950451	950665
PT-950687-950696	CATTGCTGATATTGACCCCC	60.155	20	CTATTCATTGCGGGTTGGTT	59.823	20	269	950516	950784	ATTGCTGATATTGACCCCCA	60.155	20	CTATTCATTGCGGGTTGGTT	59.823	20	268	950517	950784	CATTGCTGATATTGACCCCC	60.155	20	TCATTGCGGGTTGGTTATTT	60.188	20	265	950516	950780
PT-950735-950774	GCCAAAGAATAAAAACGGCA	60.075	20	CTCAGCATGTCTGGAAGCAG	59.726	20	219	950659	950877	TGCCAAAGAATAAAAACGGC	60.075	20	CTCAGCATGTCTGGAAGCAG	59.726	20	220	950658	950877	GCCAAAGAATAAAAACGGCA	60.075	20	GGGAAAACGTTCTTTTGCTG	59.724	20	199	950659	950857
PT-951182-951222	CTGACACAGCAACGCAATTT	59.911	20	ACCATGAAAAGGGGCTTTCT	59.94	20	277	951032	951308	TTCTTCTGACACAGCAACGC	60.183	20	ACCATGAAAAGGGGCTTTCT	59.94	20	282	951027	951308	CTGACACAGCAACGCAATTT	59.911	20	AGGGGCTTTCTAGATTTCGC	59.82	20	268	951032	951299
PT-951436-951453	AGAAAGCCCCTTTTCATGGT	59.94	20	AGGCATGAGGGAGCTAAATC	58.36	20	246	951289	951534	AGAAAGCCCCTTTTCATGGT	59.94	20	GCATGAGGGAGCTAAATCAAA	59.31	21	244	951289	951532	GCGAAATCTAGAAAGCCCCT	59.82	20	AGGCATGAGGGAGCTAAATC	58.36	20	255	951280	951534
PT-951491-951526	AGAAAGCCCCTTTTCATGGT	59.94	20	TGAGGTTATAATTAAAGCCGCTAGT	58.933	25	297	951289	951585	GAAAGCCCCTTTTCATGGTT	60.299	20	TGAGGTTATAATTAAAGCCGCTAGT	58.933	25	296	951290	951585	GCCCCTTTTCATGGTTGTAG	59.429	20	TGAGGTTATAATTAAAGCCGCTAGT	58.933	25	292	951294	951585
PT-951559-951583	TGATTTAGCTCCCTCATGCC	60.177	20	TCTCAATGACCAAGAATTGGC	60.066	21	225	951514	951738	TGATTTAGCTCCCTCATGCC	60.177	20	TCCGAATTGCCATAAATCTCA	60.409	21	241	951514	951754	TGATTTAGCTCCCTCATGCC	60.177	20	CCGAATTGCCATAAATCTCA	58.576	20	240	951514	951753
PT-951622-951622	TGATTTAGCTCCCTCATGCC	60.177	20	TCTCAATGACCAAGAATTGGC	60.066	21	225	951514	951738	TGATTTAGCTCCCTCATGCC	60.177	20	TCCGAATTGCCATAAATCTCA	60.409	21	241	951514	951754	TGATTTAGCTCCCTCATGCC	60.177	20	CCGAATTGCCATAAATCTCA	58.576	20	240	951514	951753
PT-951666-951710	TGATTTAGCTCCCTCATGCC	60.177	20	TCTCAATGACCAAGAATTGGC	60.066	21	225	951514	951738	TGATTTAGCTCCCTCATGCC	60.177	20	TCCGAATTGCCATAAATCTCA	60.409	21	241	951514	951754	TGATTTAGCTCCCTCATGCC	60.177	20	CCGAATTGCCATAAATCTCA	58.576	20	240	951514	951753
PT-951741-951767	TTGCCAATTCTTGGTCATTG	59.518	20	CCAACTGATCACCACGTCTG	60.154	20	197	951716	951912	ATTGCCAATTCTTGGTCATTG	59.815	21	CCAACTGATCACCACGTCTG	60.154	20	198	951715	951912	TTGCCAATTCTTGGTCATTG	59.518	20	TCCAACTGATCACCACGTCT	59.101	20	198	951716	951913
PT-951803-951803	TTGCCAATTCTTGGTCATTG	59.518	20	CCAACTGATCACCACGTCTG	60.154	20	197	951716	951912	GCCAATTCTTGGTCATTGAGA	60.066	21	CCAACTGATCACCACGTCTG	60.154	20	195	951718	951912	TTGAGATTTATGGCAATTCGG	59.914	21	CCAACTGATCACCACGTCTG	60.154	20	180	951733	951912
PT-951842-951842	TTGCCAATTCTTGGTCATTG	59.518	20	CCAACTGATCACCACGTCTG	60.154	20	197	951716	951912	GCCAATTCTTGGTCATTGAGA	60.066	21	CCAACTGATCACCACGTCTG	60.154	20	195	951718	951912	TTGAGATTTATGGCAATTCGG	59.914	21	CCAACTGATCACCACGTCTG	60.154	20	180	951733	951912
PT-951899-951899	TTGCCAATTCTTGGTCATTG	59.518	20	TGAATTTGACCTCCTGTGGA	59.059	20	269	951716	951984	TTGCCAATTCTTGGTCATTG	59.518	20	TCTGAATTTGACCTCCTGTGG	60.096	21	271	951716	951986	TTGCCAATTCTTGGTCATTG	59.518	20	CTGAATTTGACCTCCTGTGGA	60.096	21	270	951716	951985
PT-951932-952038	CAGACGTGGTGATCAGTTGG	60.154	20	CAGTTCGGTAGAACGTGGGT	60.028	20	213	951893	952105	CAGACGTGGTGATCAGTTGG	60.154	20	TTCGGTAGAACGTGGGTCTC	60.111	20	210	951893	952102	CAGACGTGGTGATCAGTTGG	60.154	20	CAAAACCCGATGTCGTAGGT	59.853	20	190	951893	952082
PT-952305-952311	CTCGTTACTGCCCAGAGGAG	60.005	20	AGGACGATGTGGAAAACAGG	59.966	20	161	952247	952407	CTCGTTACTGCCCAGAGGAG	60.005	20	GGCGGGATGATGATGAGTAT	59.739	20	236	952247	952482	CTCGTTACTGCCCAGAGGAG	60.005	20	ATGGAGGACGATGTGGAAAA	60.317	20	165	952247	952411
PT-953028-953028	CTGGGAAGAATTGCAGGAAA	60.184	20	CGATTCTGCTAGTCCTTGGG	59.83	20	223	952920	953142	CTGGGAAGAATTGCAGGAAA	60.184	20	AACCCATTGAGATGACCCAA	60.173	20	257	952920	953176	CTGGGAAGAATTGCAGGAAA	60.184	20	ACCCATTGAGATGACCCAAG	59.779	20	256	952920	953175
